# Supplementary material
Source: Royal Society of Chemistry journal article supplement (doi:10.1039/d6py00565a)
Supplement: d6py00565a1.pdf [file d6py00565a1.pdf]

## Supporting information

### **Deciphering the chain propagation mechanism in regioselective polymerization via alkene difunctionalization**

*Malavika R S, Rositha Kuniyil\**

Department of Chemistry, Indian Institute of Technology Palakkad, Kanjikode (P.O), 678623  
Palakkad, Kerala, India.

# Contents

|             |                                                                               |            |
|-------------|-------------------------------------------------------------------------------|------------|
| <b>I.</b>   | <b>Computational methodology</b>                                              | <b>S3</b>  |
| <b>II.</b>  | <b>Other possible mechanistic pathways</b>                                    |            |
| 1.          | Direct transmetalation in the absence of base                                 | S4         |
| 2.          | Competing $\beta$ -hydride elimination vs transmetalation                     | S5         |
| 3.          | Ligand-free reductive elimination                                             | S6         |
| 4.          | Competing Reductive elimination vs $\beta$ -hydride elimination               | S7         |
| 5.          | Pathways for the first chain propagation                                      |            |
| a.          | First propagation via the chain-end mechanism and monomer-initiated mechanism | S8         |
| b.          | First propagation via the step-growth mechanism                               | S10        |
| 6.          | Different possibilities of the second propagation                             |            |
| a.          | Propagation via the step-growth mechanism and chain-end mechanism             | S11        |
| b.          | Propagation via coupling of the P2 unit with P1 via a step-growth mechanism   | S12        |
| c.          | Propagation via a monomer-initiated mechanism                                 | S13        |
| 7.          | Potential formation of a side product                                         | S14        |
| <b>III.</b> | <b>Distortion-Interaction/Activation-Strain (DI-AS) Analysis</b>              | <b>S15</b> |
| <b>IV.</b>  | <b>Energy Decomposition Analysis</b>                                          | <b>S18</b> |
| <b>V.</b>   | <b>NBO analysis</b>                                                           | <b>S19</b> |
| <b>VI.</b>  | <b>References</b>                                                             | <b>S24</b> |
| <b>VII.</b> | <b>Cartesian coordinates of the optimized geometries</b>                      | <b>S27</b> |

## I. Computational Methodology

All calculations were performed using the Gaussian 16 (Revision C.01) suite of quantum chemical program.<sup>1</sup> The geometries of all stationary points were optimised at the B3LYP<sup>2</sup> level of theory with Grimme's dispersion correction<sup>3</sup> and the Becke–Johnson damping scheme<sup>4</sup>. For geometry optimisations, the Stuttgart–Dresden double- $\zeta$  basis set (SDD)<sup>5</sup> was used for Ni and Br, while the 6-31G(d,p) basis set was employed for all other atoms.<sup>6</sup> Frequency analysis was performed to verify whether each optimised geometry corresponded to a minimum or a transition state. Additionally, intrinsic reaction coordinate (IRC) calculations were carried out to confirm that each transition state connects to the corresponding minima on both sides of the reaction pathway.<sup>7</sup> Single-point energy calculations were performed using the M06-L<sup>8</sup> functional with the larger 6-311++G(d,p)<sup>9</sup> basis set for all atoms except Ni and Br, for which the SDD basis set was retained. Solvent effects were included during the single-point calculations using the SMD implicit solvation model, with toluene as the continuum dielectric ( $\epsilon = 2.37$ ).<sup>10</sup>

Activation strain analysis was performed to understand the effect of the distortion and interaction energy in the transition states.<sup>11</sup> The activation strain energy was decomposed into two components: the distortion energy ( $\Delta E_{dist}$ ), which corresponds to the energy required to deform the individual fragments from their equilibrium geometries to the transition state geometry, and the interaction energy ( $\Delta E_{int}$ ), which represents the interaction between the distorted fragments.

$$\Delta E_{act}^{\ddagger} = \Delta E_{dist} + \Delta E_{int}$$

Further partitioning of the interaction energy was carried out using the second-generation Energy Decomposition Analysis (EDA), based on the absolutely localised molecular orbital (ALMO-EDA)<sup>12</sup> method, as implemented in Q-Chem 6.2.<sup>13</sup> The interaction energy between the reacting fragments can be further dissected as:

$$\Delta E_{int} = \Delta E_{pauli} + \Delta E_{elstat} + \Delta E_{pol} + \Delta E_{ct} + \Delta E_{disp}$$

According to the above equation, the interaction energy  $\Delta E_{int}$  constitutes of Pauli repulsion ( $\Delta E_{pauli}$ ), electrostatic interaction ( $\Delta E_{elstat}$ ), polarisation ( $\Delta E_{pol}$ ), charge

transfer ( $\Delta E_{ct}$ ) and dispersion ( $\Delta E_{disp}$ ). The ALMO-EDA calculations were performed incorporating the solvent effects, at the M06-L/6-311G(d,p)/SDD level of theory. Natural Bond Orbital (NBO) analysis was conducted on key transition states to characterize donor–acceptor orbital interactions and to obtain the corresponding second-order perturbation stabilisation energies using NBO 7.0.<sup>14</sup> Space-filling models of the key transition states were generated using UCSF Chimera.<sup>15</sup> The transition state geometries were generated using CYL view<sup>16</sup>, and NBO plots were generated using Chemcraft software.<sup>17</sup>

## II. Other possible mechanistic pathways

### 1. Direct transmetalation in the absence of base

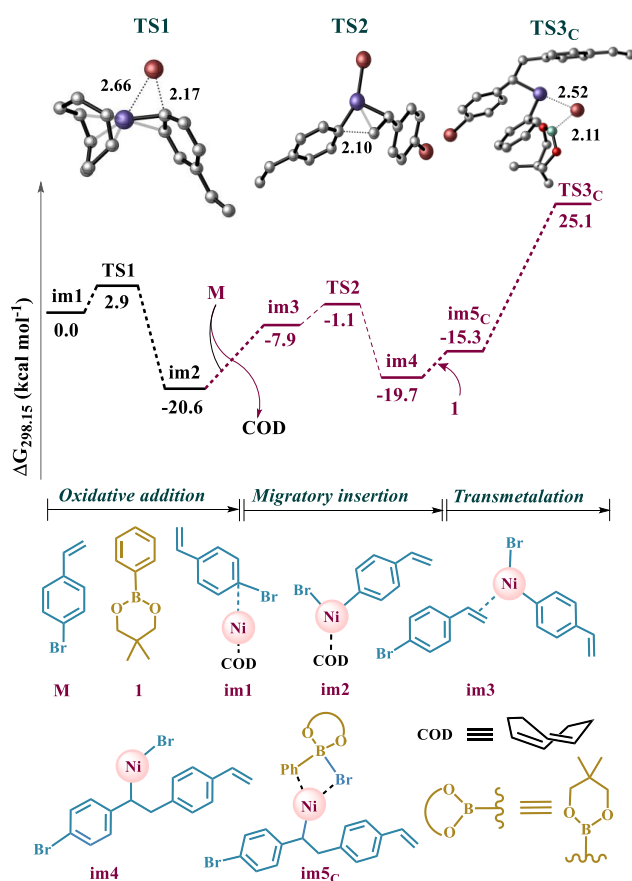

**Fig. S1.** Computed Gibbs free energy profile diagram for the direct transmetalation in the absence of base KOEt, in kcal/mol, at the SMD/M06L/6-311++G(d,p),SDD(Ni,Br)/B3LYP-D3BJ/6-31G(d),SDD(Ni,Br) level of theory. Key intermediates are provided. The bond length in the transition states is given in Å

A base-free direct transmetalation was evaluated via a transition state of **TS3<sub>C</sub>** (Fig. S1). This pathway exhibits a higher activation barrier of 45.7 kcal/mol with respect to the stable intermediate **im2**, rendering it highly unfavourable compared to the base-assisted transmetalation, involving potassium ethoxide (Figure 1a).

## 2. Competing $\beta$ -hydride elimination vs transmetalation

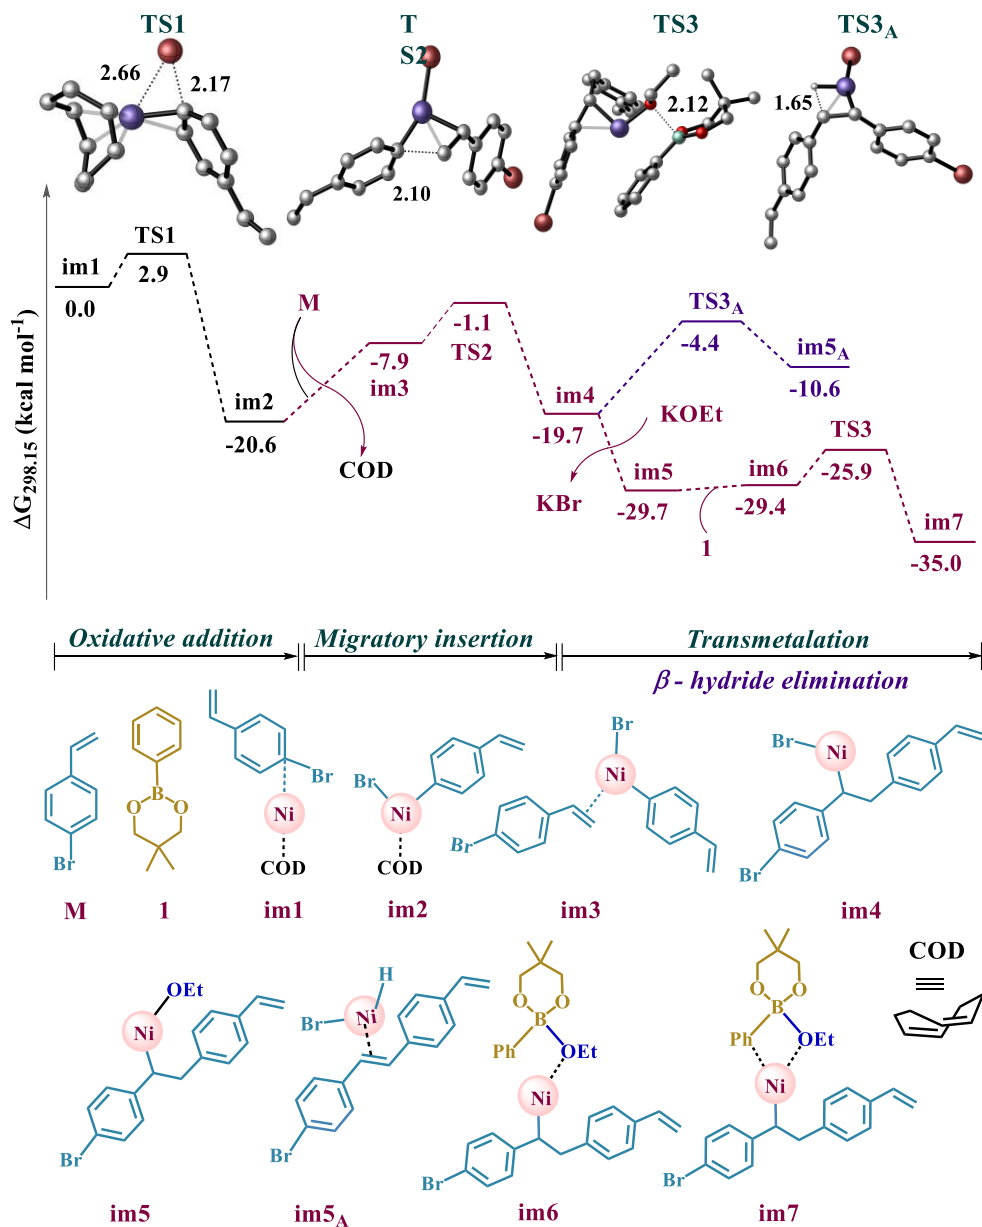

**Fig. S2.** Computed Gibbs free energy profile diagram of competing  $\beta$ -hydride elimination and transmetalation, in kcal/mol, at the SMD/M06L/6-311++G(d,p),SDD(Ni,Br)//B3LYP-D3BJ/6-31G(d),SDD(Ni,Br) level of theory. Key intermediates are provided. The bond length in the transition states is given in Å

After migratory insertion, there is a possibility of competing  $\beta$ -hydride elimination alongside transmetalation (Fig. S2). The  $\beta$ -hydride elimination occurs via a 4-membered transition state, **TS3<sub>A</sub>**, with an energy barrier of 16.2 kcal/mol relative to stable intermediate **im2**, which is higher than that of the competing base-assisted transmetalation. The resulting Ni-alkene  $\pi$  intermediate is unstable when compared to the biaryl precursor obtained from transmetalation, making the  $\beta$ -hydride elimination less favourable.

### 3. Ligand-free reductive elimination (Absence of COD)

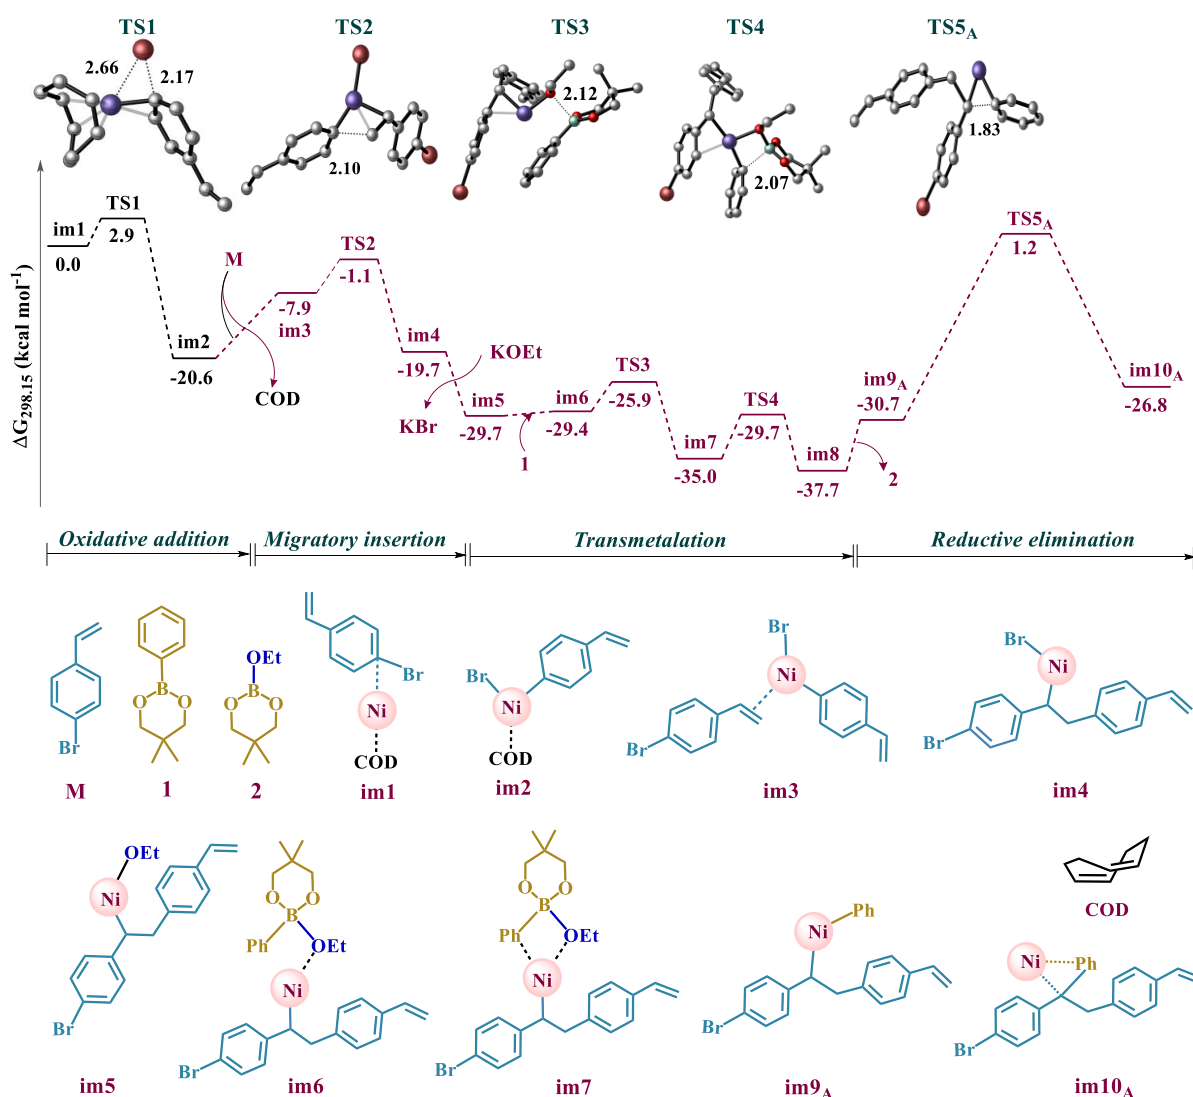

**Fig. S3.** Computed Gibbs free energy profile diagram for the alkene difunctionalisation of 4-bromostyrene, highlighting reductive elimination in the absence of COD ligand, in kcal/mol at the SMD/M06L/6-311++G(d,p),SDD(Ni,Br)//B3LYP-D3BJ/6-31G(d),SDD(Ni,Br) level of theory. Key intermediates are provided. The bond length in the transition states is given in Å

To investigate the role of ligand in assisting reductive elimination, a ligand-free pathway was examined (Fig. S3). The computed transition state **TS5<sub>A</sub>** has an activation energy of 38.9 kcal/mol with respect to the stable intermediate **im8**, which is significantly higher than the ligand-assisted reductive elimination. This highlights the importance of the ligand in the C-C bond formation during reductive elimination.

#### 4. Competing Reductive elimination vs $\beta$ -hydride elimination

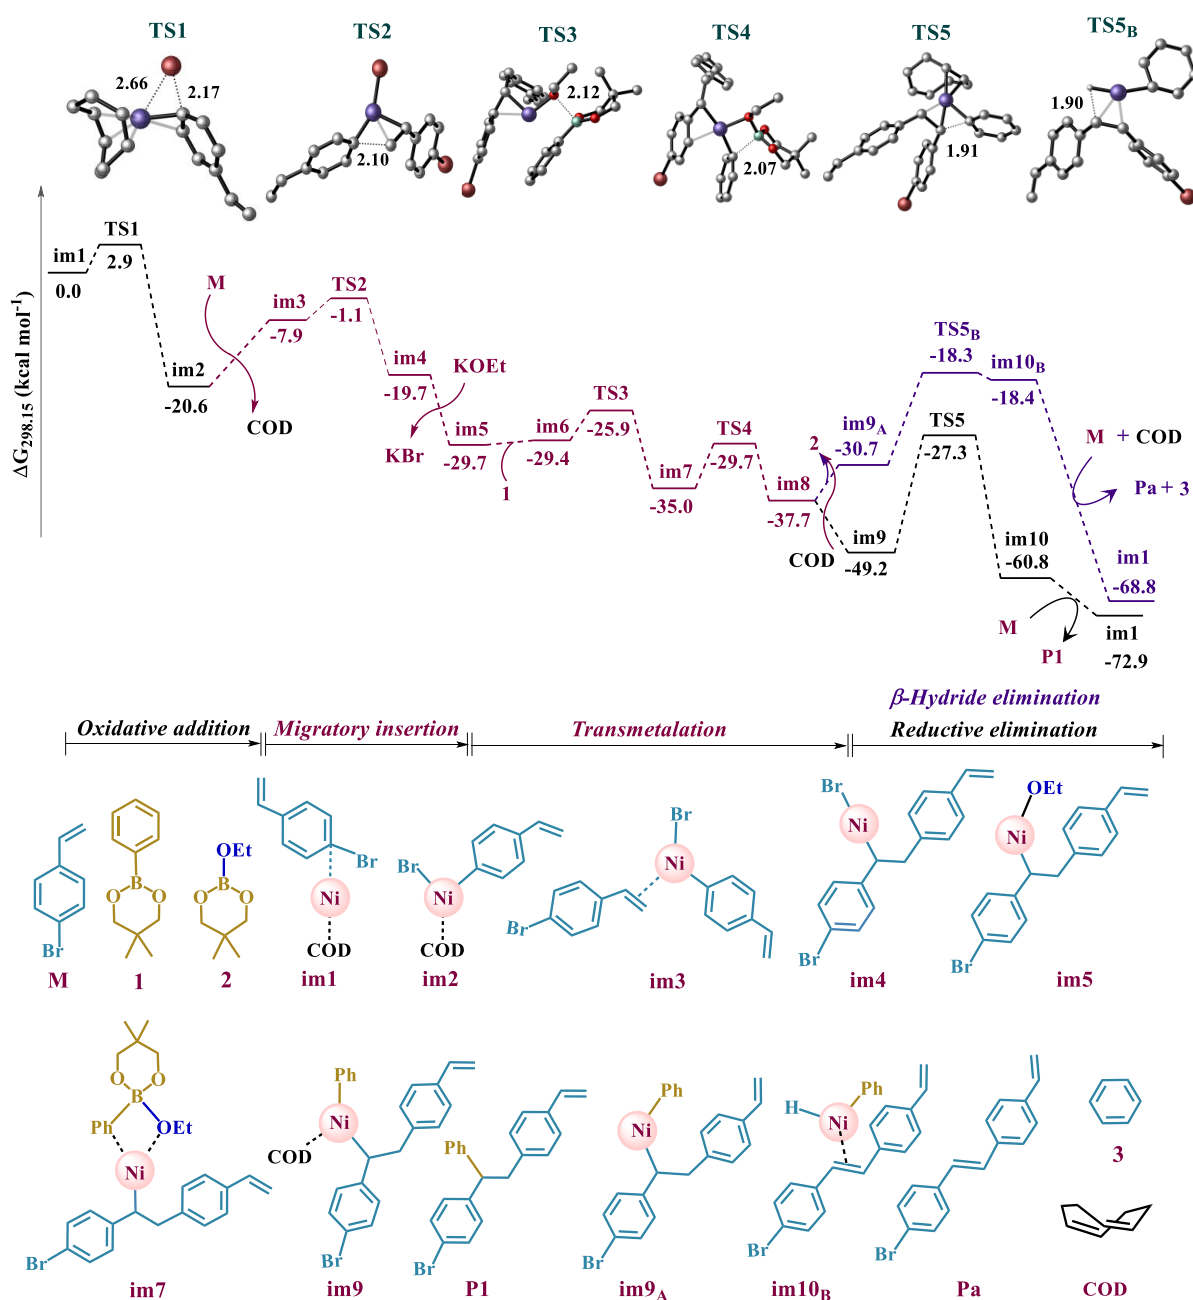

**Fig. S4.** Computed Gibbs free energy profile diagram for the alkene difunctionalisation of 4-bromostyrene, highlighting reductive elimination and the competing  $\beta$ -hydride elimination, in

kcal/mol at the SMD/M06L/6-311++G(d,p),SDD(Ni,Br)//B3LYP-D3BJ/6-31G(d),SDD(Ni,Br) level of theory. Key intermediates are provided. The bond length in the transition states is given in Å

A competing  $\beta$ -hydride elimination can also occur from the same biaryl intermediate **im8**, via the transition state **TS5<sub>B</sub>** (Fig. S4). However, the coordination of COD makes the reductive elimination more feasible (**TS5**) for the formation of difunctionalised product **P1** instead of the Heck product **P<sub>a</sub>**.

## 5. Pathways for the first chain propagation

There are three possible pathways for the first propagation. These pathways follow the same sequence of steps: oxidative addition, migratory insertion, transmetalation and reductive elimination. The only distinction is between species that undergo oxidative addition and those that undergo migratory insertion, while the latter steps remain mechanistically similar.

### a. First propagation via the chain-end mechanism and monomer-initiated mechanism

The product formed, **P1** (Figure 1a), can propagate either via a chain-end mechanism (Path A) or via a monomer-initiated mechanism (Path B) (Fig. S5a). In Path A, the bromine end of the product **P1** undergoes oxidative addition, followed by migratory insertion of a molecule of 4-bromostyrene into the Ni-C bond. In contrast, in Path B, the monomer undergoes oxidative addition, followed by migratory insertion of the vinyl end of the product **P1** into the Ni-C bond. In both pathways, the subsequent step involves base-assisted transmetalation with phenylboronic ester, followed by a C-C bond-forming reductive elimination, to give product **P2**. In both these pathways, migratory insertion is identified as the rate-determining step. However, in Path B, the stepwise transmetalation, involving the transfer of the aryl group, occurs via a transition state **TS4<sub>b</sub>**, which has a difference in activation free energy of 15.9 kcal/mol relative to Path A.

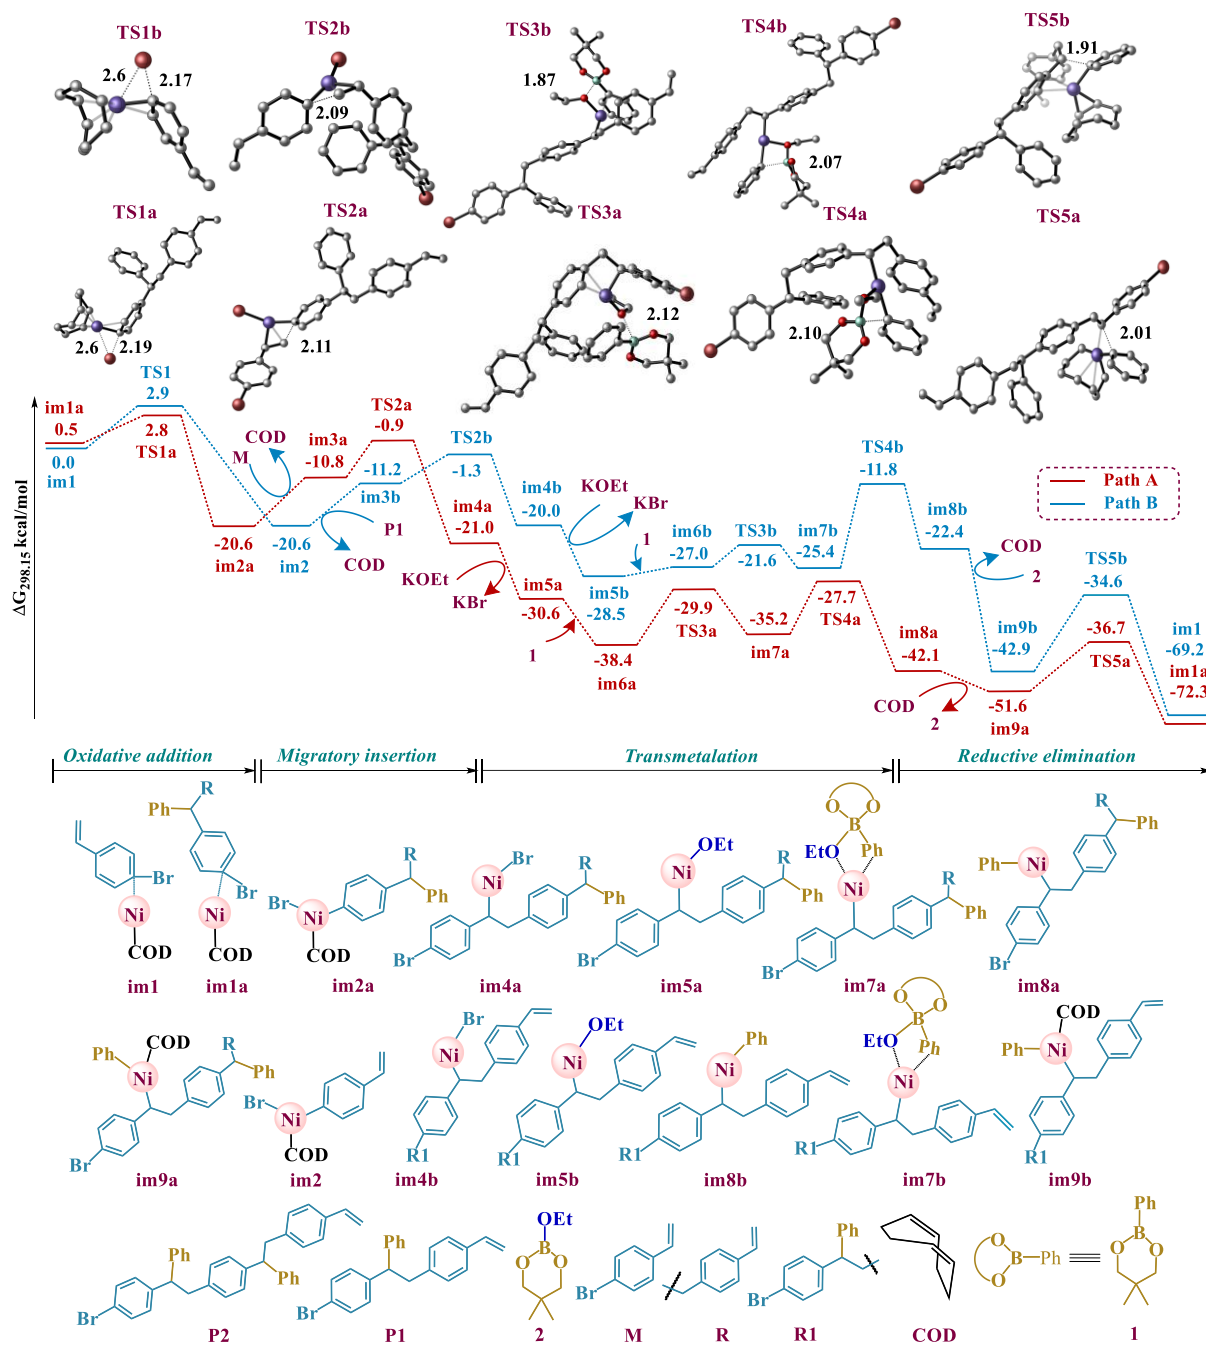

**Fig. S5a.** Computed Gibbs free energy profile diagram for the first propagation via chain-end mechanism (Path A) and monomer-initiated mechanism (Path B) in kcal/mol at the SMD/M06L/6-311++G(d,p),SDD(Ni,Br)//B3LYP-D3BJ/6-31G(d),SDD(Ni,Br) level of theory. Key intermediates are provided. The bond length in the transition states is given in Å

**b. First propagation via the step-growth mechanism**

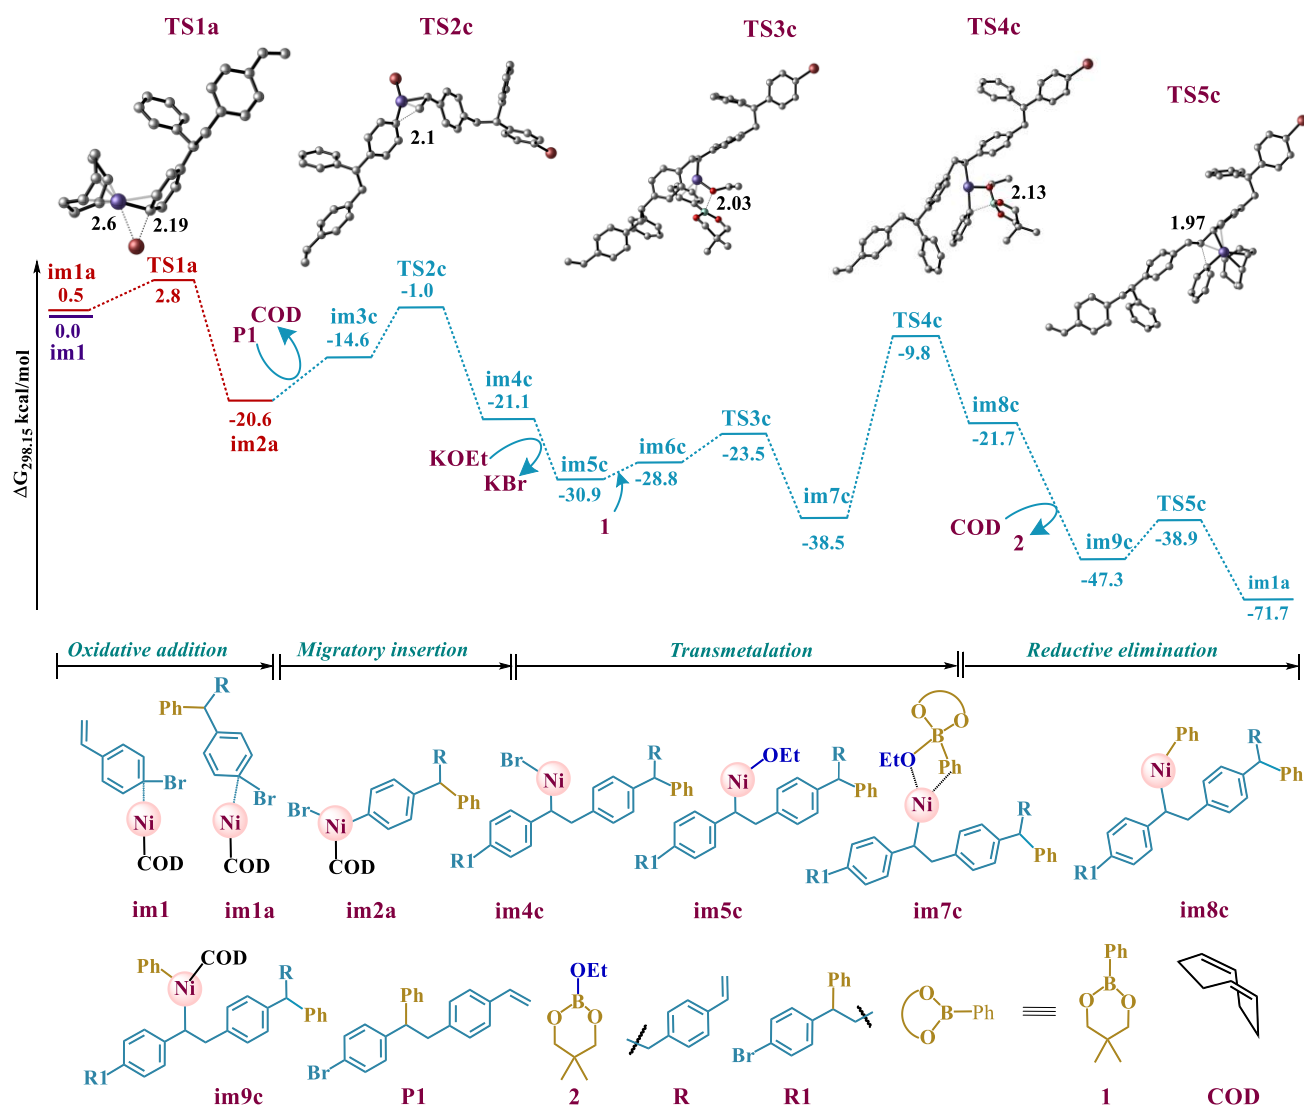

**Fig. S5b.** Computed Gibbs free energy profile diagram for the first propagation via step-growth mechanism (Path C) in kcal/mol at the SMD/M06L/6-311++G(d,p),SDD(Ni,Br)//B3LYP-D3BJ/6-31G(d),SDD(Ni,Br) level of theory. Key intermediates are provided. The bond length in the transition states is given in Å.

Another possibility of chain propagation is self-coupling of the product **P1** unit via a step-growth polymerisation mechanism (Fig. S5b). The sequence of steps remains the same. The first step involves oxidative addition of bromine to the end of **P1** unit, followed by migratory insertion of the vinyl end of the **P1** unit into the Ni-C bond. The subsequent step involves a base-assisted step-wise transmetalation with phenylboronic ester, followed by a C-C bond-forming reductive elimination resulting in a product with an increased chain length, **P2a**. In this pathway, the transmetalation step possess a very high energy barrier of 28.7 kcal/mol (relative to the stable intermediate **im7c**), making it less favourable pathway compared to Path A.

## 6. Different possibilities of the second propagation

### a. Propagation via the step-growth mechanism and chain-end mechanism

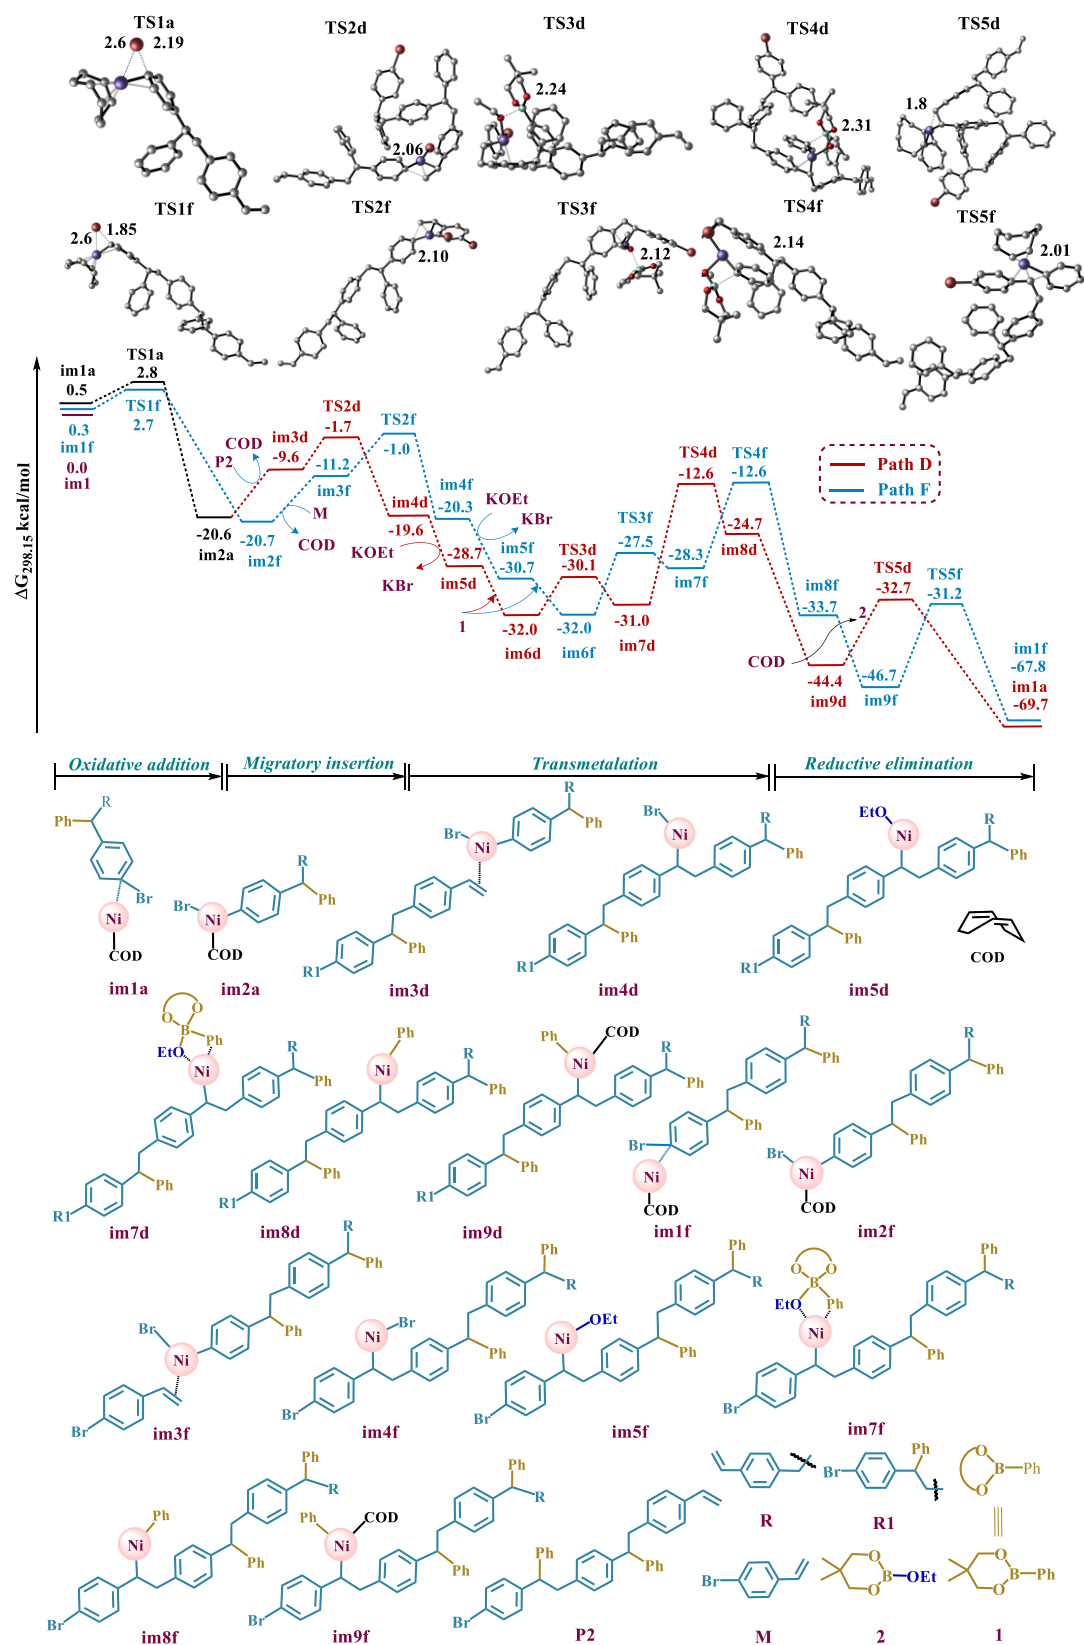

**Fig. S6a.** Computed Gibbs free energy profile diagram for the second propagation via step-growth and chain-end mechanism (Path D and Path F) in kcal/mol at the SMD/M06L/6-311++G(d,p),SDD(Ni,Br)//B3LYP-D3BJ/6-31G(d),SDD(Ni,Br) level of theory. Key intermediates are provided. The bond length in the transition states is given in Å.

There are four possible pathways for the second propagation. These pathways follow the same sequence of steps: oxidative addition, migratory insertion, transmetalation and reductive elimination. The only distinction is between the species that undergo oxidative addition and migratory insertion, while the latter steps remain mechanistically similar.

For the second propagation, we have considered all the different possibilities; among them, the more favourable pathways are the coupling of **P1** with **P2** via a step-growth mechanism (Path D) and the chain-end mechanism (Path F) (Fig. S6a). In Path D, the product **P1** undergoes oxidative addition to the Ni(COD) species, followed by migratory insertion of **P2** into the Ni-C bond. Subsequent transmetalation and reductive elimination results in the formation of the product **P3** with a greater chain length. In this pathway, migratory insertion is determined as the rate-determining step.

The chain-end type mechanism (Path F) involves the oxidative addition of **P2** with Ni(COD) followed by migratory insertion of the monomer (4-bromostyrene) to the Ni-C bond. The subsequent steps are the same as the previous ones, yielding product **P3a** characterised by a shorter chain compared to **P3**. The energy barriers for the rate-determining migratory insertion step in Paths D and F are nearly identical, suggesting both are equally favourable for the second propagation.

#### **b. Propagation via coupling of the P2 unit with P1 via a step-growth mechanism**

In Path E, which involves a coupling mechanism, the **P2** unit undergoes oxidative addition to the catalytically active Ni(COD) species, followed by migratory insertion of the **P1** unit to the Ni-C bond, resulting in the intermediate **im4e** (Fig. S6b). This is followed by the transmetalation and reductive elimination leading to the product **P3**. Here, the migratory insertion and reductive elimination have an activation energy higher compared to Path D and Path F, making it less favourable pathway.

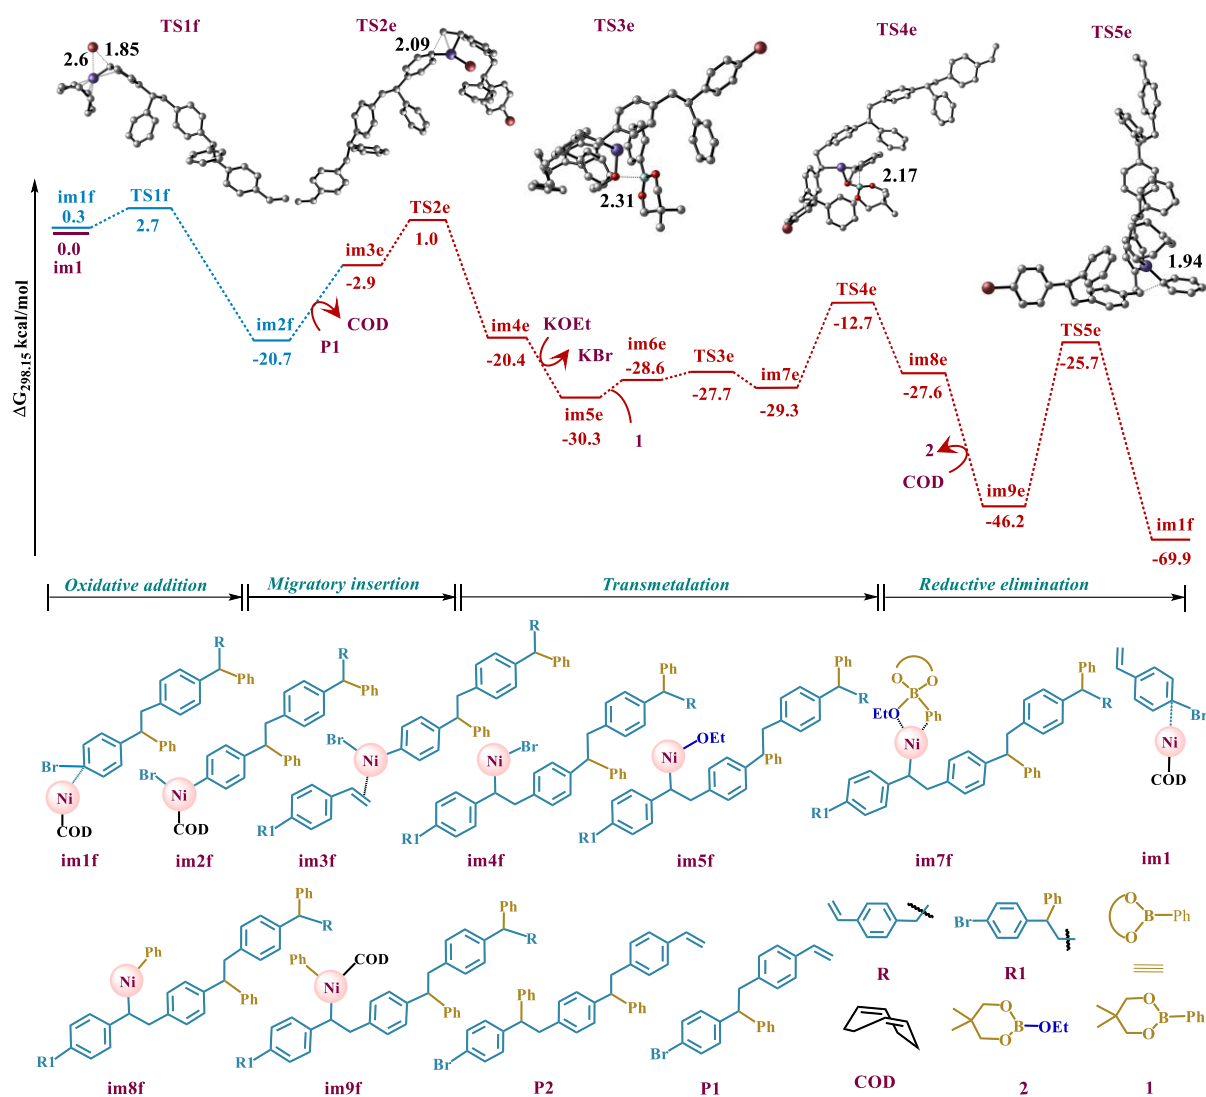

**Fig. S6b.** Computed Gibbs free energy profile diagram for the second propagation via coupling of P2 unit with P1 unit (Path E) in kcal/mol at the SMD/M06L/6-311++G(d,p),SDD(Ni,Br)//B3LYP-D3BJ/6-31G(d),SDD(Ni,Br) level of theory. Key intermediates are provided. The bond length in the transition states is given in Å.

### c. Propagation via a monomer-initiated mechanism

Path G involves a monomer-initiated mechanism; the **P2** undergoes migratory insertion to the Ni-C bond of the oxidative addition product **im2** (Figure 1a). This is followed by the transmetalation and reductive elimination leading to the product **P3a** (Fig. S6c). Here, the reductive elimination traverse through a very high energy barrier compared to Path D and Path F, making it least feasible pathway.

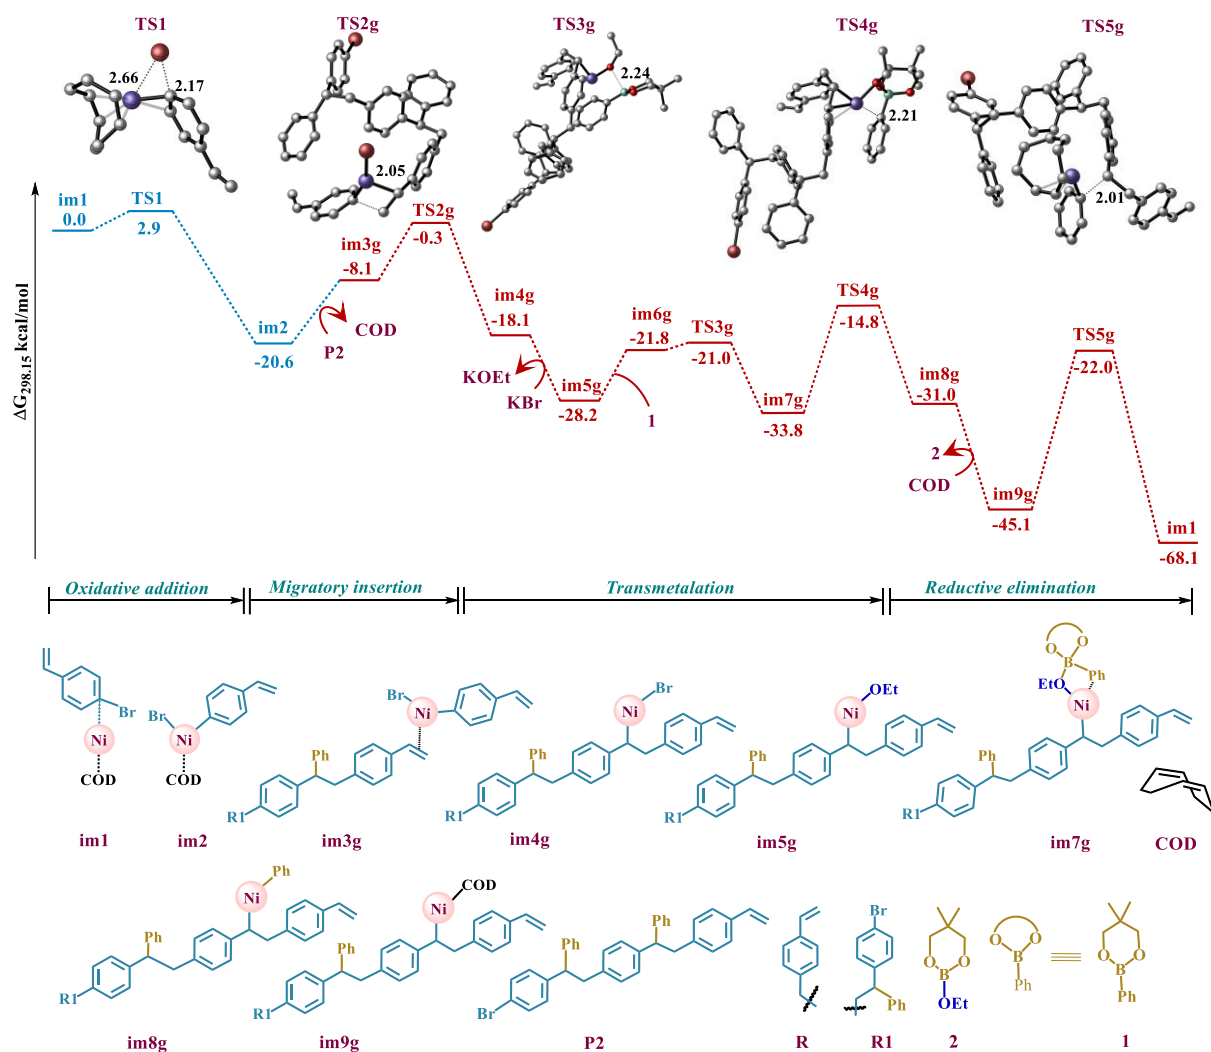

**Fig. S6c.** Computed Gibbs free energy profile diagram for the second propagation via monomer-initiated mechanism (Path G) in kcal/mol at the SMD/M06L/6-311++G(d,p),SDD (Ni,Br)//B3LYP-D3BJ/6-31G(d),SDD(Ni,Br) level of theory. Key intermediates are provided. The bond length in the transition states is given in Å.

## 7. Potential formation of a side product

We also looked into the energetics for the formation of potential side-product poly(4-bromostyrene), which occurs by an anionic polymerisation mechanism (Fig. S7). It occurs in the presence of base potassium ethoxide. The reaction proceeds via a transition state, **TSb1**, which has an energy barrier of 50.4 kcal/mol with respect to stable intermediate **im1**.

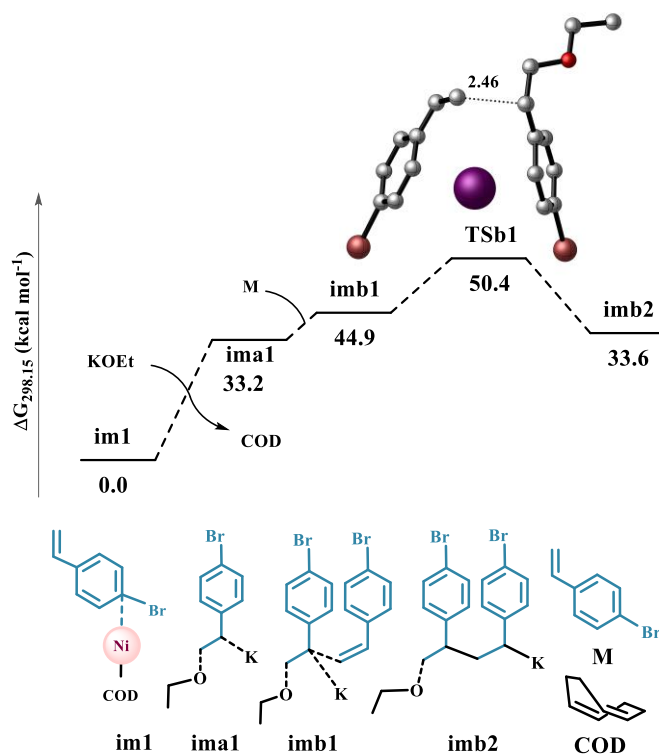

**Fig. S7.** Computed Gibbs free energy profile diagram for the formation of side-product poly(4-bromostyrene) in kcal/mol at the SMD/M06L/6-311++G(d,p),SDD(Ni,Br)//B3LYP-D3BJ/6-31G(d),SDD(Ni,Br) level of theory. Key intermediates are provided. The bond length in the transition states is given in Å.

### III. Distortion-Interaction/Activation-Strain (DI/AS) Analysis

To investigate the selectivity during the migratory insertion step, we have analysed the regioselectivity-controlling transition states **TS2** and **TS2<sub>B</sub>** using the distortion–interaction/activation-strain (DI–AS) analysis. The activation strain energy of the transition state ( $\Delta E^\ddagger$ ) is the sum of distortion ( $\Delta E_{\text{dist}}$ ) and interaction ( $\Delta E_{\text{int}}$ ) energies. As shown in Table S1, the interaction energies are similar for both pathways, and a significant difference of 5.2 kcal/mol is observed for the distortion energy. Lower distortion energy in **TS2** results in a lower activation barrier than in the competing regioselective transition state **TS2<sub>B</sub>**. Thus, the observed selectivity is governed by the geometric deformations that are required to reach the transition state.

**Table S1.** Summary of Distortion-Interaction/Activation-Strain (DI/AS) Analysis for the selectivity-determining Transition States (**TS2** and **TS2<sub>B</sub>**). The activation energies ( $\Delta E^\ddagger$ ) are decomposed into distortion ( $\Delta E_{\text{dist}}$ ) and interaction energy ( $\Delta E_{\text{int}}$ ) contributions. Energies provided are in kcal/mol.

| Transition state | Distortion energy ( $\Delta E_{\text{dist}}$ ) |        |                       | Interaction energy ( $\Delta E_{\text{int}}$ ) (d) | Activation strain $\Delta E^\ddagger$ (e) = (c) + (d) | $\Delta\Delta G^\ddagger$ |
|------------------|------------------------------------------------|--------|-----------------------|----------------------------------------------------|-------------------------------------------------------|---------------------------|
|                  | F1 (a)                                         | F2 (b) | Total (c) = (a) + (b) |                                                    |                                                       |                           |
| TS2              | 21.07                                          | 12.56  | 33.62                 | -61.88                                             | -28.26                                                | 0.0                       |
| TS2 <sub>B</sub> | 21.39                                          | 17.44  | 38.83                 | -63.84                                             | -25.01                                                | 2.8                       |

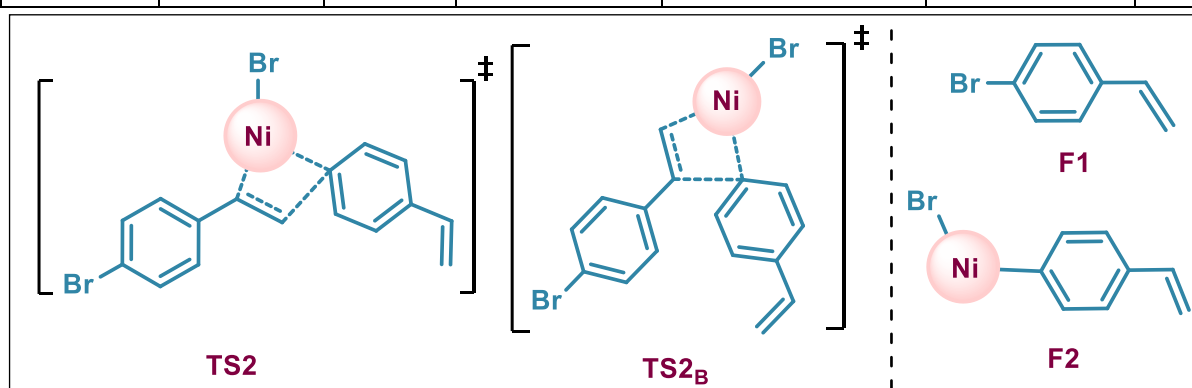

We also performed DI/AS for the migratory insertion step for the second propagation pathways (Path D – Path E) to identify factors influencing the activation barrier, and the results are summarised in Table S2. The DI/AS results highlight that the interaction energy component is the dominant factor accounting for the difference in activation free energies, whereas the distortion energies remain relatively similar. The interaction energy of the competing transition states ( $\Delta\Delta E_{\text{int}}$ ) differs by 14.9 kcal/mol. Thus, the reactivity trends are governed by the difference in the interaction between the reacting fragments.

**Table S2.** Summary of Distortion-Interaction/Activation-Strain (DI-AS) Analysis for the migratory insertion Transition States (TS2d-TS2g) of second propagation pathways. The activation energies ( $\Delta E^\ddagger$ ) are decomposed into distortion ( $\Delta E_{\text{dist}}$ ) and interaction energy ( $\Delta E_{\text{int}}$ ) contributions. Energies provided are in kcal/mol.

| Transition state | Distortion energy ( $\Delta E_{\text{dist}}$ ) |        |                       | Interaction energy ( $\Delta E_{\text{int}}$ ) (d) | Activation strain $\Delta E^\ddagger$ (e) = (c) + (d) | $\Delta\Delta G^\ddagger$ |
|------------------|------------------------------------------------|--------|-----------------------|----------------------------------------------------|-------------------------------------------------------|---------------------------|
|                  | F1 (a)                                         | F2 (b) | Total (c) = (a) + (b) |                                                    |                                                       |                           |
| TS2d             | 21.36                                          | 15.91  | 37.27                 | -76.25                                             | -38.98                                                | 0.0                       |
| TS2e             | 21.73                                          | 15.74  | 37.47                 | -66.31                                             | -28.83                                                | 2.8                       |
| TS2f             | 20.77                                          | 12.26  | 33.02                 | -61.39                                             | -28.37                                                | 0.8                       |
| TS2g             | 21.18                                          | 16.57  | 37.75                 | -72.13                                             | -34.39                                                | 1.4                       |

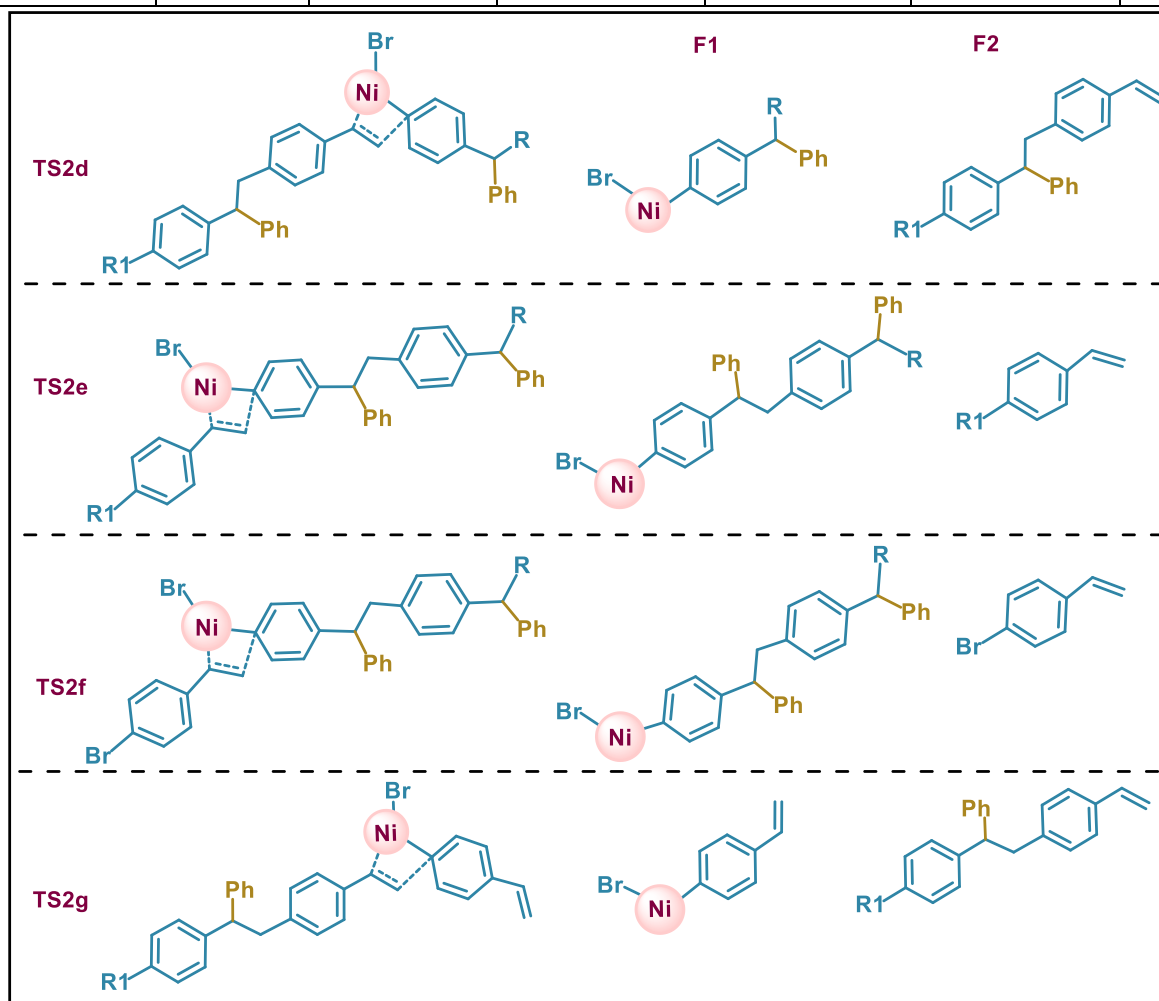

#### IV. Energy Decomposition Analysis

Energy Decomposition Analysis (EDA) was carried out on the selected transition states to obtain further understanding of the factors contributing to the interaction energy. The interaction energy is further decomposed into steric, electronic and dispersion components to identify the factors that control the observed selectivity and reactivity trends.

Although the distortion interaction analysis determines that distortion energy governs the regioselectivity, EDA helps understand the nature of the interactions between the reacting fragments. The EDA results in Table S3 reveal a large variation in the Pauli repulsion component, indicating increased steric congestion in TS2<sub>B</sub> compared to TS2. While interaction energy does not account for the observed selectivity, the EDA analysis provides a detailed description of the electronic and steric factors contributing to the interaction energy.

**Table S3.** Summary of Energy Decomposition Analysis for the selectivity-determining Transition States (TS2 and TS2<sub>B</sub>). Energies provided are in kcal/mol

| Transition state | Steric effects<br>( $\Delta E_{\text{steric}}$ ) |                                         | Electronic effects<br>( $\Delta E_{\text{elec}}$ ) |                                             |                                               | Dispersion<br>( $\Delta E_{\text{disp}}$ ) |
|------------------|--------------------------------------------------|-----------------------------------------|----------------------------------------------------|---------------------------------------------|-----------------------------------------------|--------------------------------------------|
|                  | Distortion<br>( $\Delta E_{\text{dist}}$ )       | Paulis<br>( $\Delta E_{\text{pauli}}$ ) | Electrostatics<br>( $\Delta E_{\text{elstat}}$ )   | Polarisation<br>( $\Delta E_{\text{pol}}$ ) | Charge transfer<br>( $\Delta E_{\text{ct}}$ ) |                                            |
| TS2              | 33.62                                            | 252.57                                  | -131.29                                            | -29.32                                      | -90.25                                        | -23.99                                     |
| TS2 <sub>B</sub> | 38.83                                            | 297.54                                  | -170.01                                            | -66.64                                      | -96.87                                        | -26.74                                     |

While DI/AS was performed for the different second propagation pathways, EDA was restricted to the transition states TS2d and TS2e that exhibited a large difference in activation energy. These transition states were evaluated using EDA to identify the steric and electronic factors that determine the difference in reactivity. As shown in Table S4, there are no large differences in the steric and electronic components; however, TS2d exhibits a stronger dispersion interaction ( $\Delta\Delta E_{\text{disp}} = 17.38$  kcal/mol). These results indicate that differences in attractive non-covalent interactions account for the variations in interaction energy.

The contribution of electronics, steric and dispersion interactions are shown in the Figure S8.

**Table S4.** Summary of Energy Decomposition Analysis for the migratory insertion transition states TS2d and TS2e for the second propagation pathways. Energies provided are in kcal/mol.

| Transition state | Steric effects ( $\Delta E_{\text{steric}}$ ) |                                      | Electronic effects ( $\Delta E_{\text{elec}}$ ) |                                          |                                            | Dispersion ( $\Delta E_{\text{disp}}$ ) |
|------------------|-----------------------------------------------|--------------------------------------|-------------------------------------------------|------------------------------------------|--------------------------------------------|-----------------------------------------|
|                  | Distortion ( $\Delta E_{\text{dist}}$ )       | Paulis ( $\Delta E_{\text{pauli}}$ ) | Electrostatics ( $\Delta E_{\text{elstat}}$ )   | Polarisation ( $\Delta E_{\text{pol}}$ ) | Charge transfer ( $\Delta E_{\text{ct}}$ ) |                                         |
| TS2d             | 37.37                                         | 284.81                               | -145.18                                         | -36.12                                   | -96.13                                     | -51.34                                  |
| TS2e             | 37.47                                         | 284.02                               | -143.31                                         | -43.26                                   | -93.45                                     | -33.96                                  |

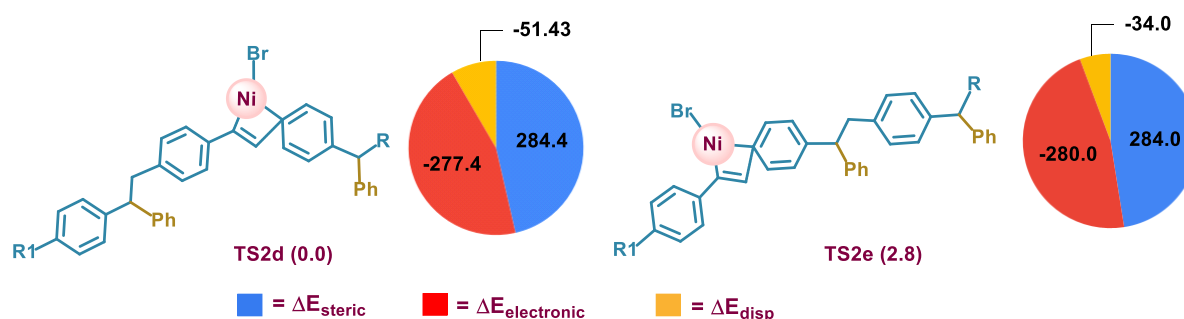

**Figure S8.** Contributions of different types of interactions (absolute values), as determined by ALMO-EDA analysis for the second propagation migratory insertion transition states TS2d and TS2e. The steric effect ( $\Delta E_{\text{steric}}$ ) comprises the sum of distortion energy ( $\Delta E_{\text{dist}}$ ) and Pauli repulsion ( $\Delta E_{\text{pauli}}$ ), while the electronic effect ( $\Delta E_{\text{electronic}}$ ) corresponds to the sum of electrostatic interaction ( $\Delta E_{\text{elstat}}$ ), polarization ( $\Delta E_{\text{pol}}$ ) and charge transfer ( $\Delta E_{\text{ct}}$ ). Relative Gibbs free energies for the second propagation migratory insertion transition states are provided in kcal mol<sup>-1</sup> (values in parentheses)

## V. NBO Analysis

### 1. For first propagation

We have conducted NBO analysis for the transmetalation transition state (TS4a-TS4c) for the different possibilities of chain propagation. Some of the significant donor-acceptor interactions are summarised in the Table S5.

**Table S5:** Summary of the favourable donor-acceptor interactions for the transmetalation step transition state (TS4a-TS4c) during the first propagation. The donor-acceptor interaction

energies are calculated using second-order perturbation theory (SOPT), and the orbitals involved in the reaction are provided

| Interactions                           | <b>TS4a</b><br><b><math>\Delta E(\text{SOPT})</math></b><br><b>kcal/mol</b> | <b>TS4b</b><br><b><math>\Delta E(\text{SOPT})</math></b><br><b>kcal/mol</b> | <b>TS4c</b><br><b><math>\Delta E(\text{SOPT})</math></b><br><b>kcal/mol</b> |
|----------------------------------------|-----------------------------------------------------------------------------|-----------------------------------------------------------------------------|-----------------------------------------------------------------------------|
| LP(O1) $\rightarrow$ LV(Ni2)           | 18.94                                                                       | 20.75                                                                       | 14.50                                                                       |
| LP(O1) $\rightarrow$ LV(B3)            | 17.89                                                                       | 17.91                                                                       | 11.16                                                                       |
| LP(O1) $\rightarrow$ LV1(B3)           | 40.93                                                                       | 68.35                                                                       | 105.34                                                                      |
| LP(O1) $\rightarrow$ LV2(B3)           | 121.78                                                                      | 99.74                                                                       | 123.77                                                                      |
| LP(O1) $\rightarrow$ LV3(B3)           | 84.43                                                                       | 70.18                                                                       | 1.35                                                                        |
| BD(C4-B3) $\rightarrow$ LV(Ni2)        | 36.28                                                                       | 23.33                                                                       | 30.17                                                                       |
| BD(C4-B3) $\rightarrow$<br>BD*(Ni2-C5) | 34.79                                                                       | 30.81                                                                       | 40.79                                                                       |
| <b>Total</b>                           | 355.04                                                                      | 331.07                                                                      | 327.08                                                                      |

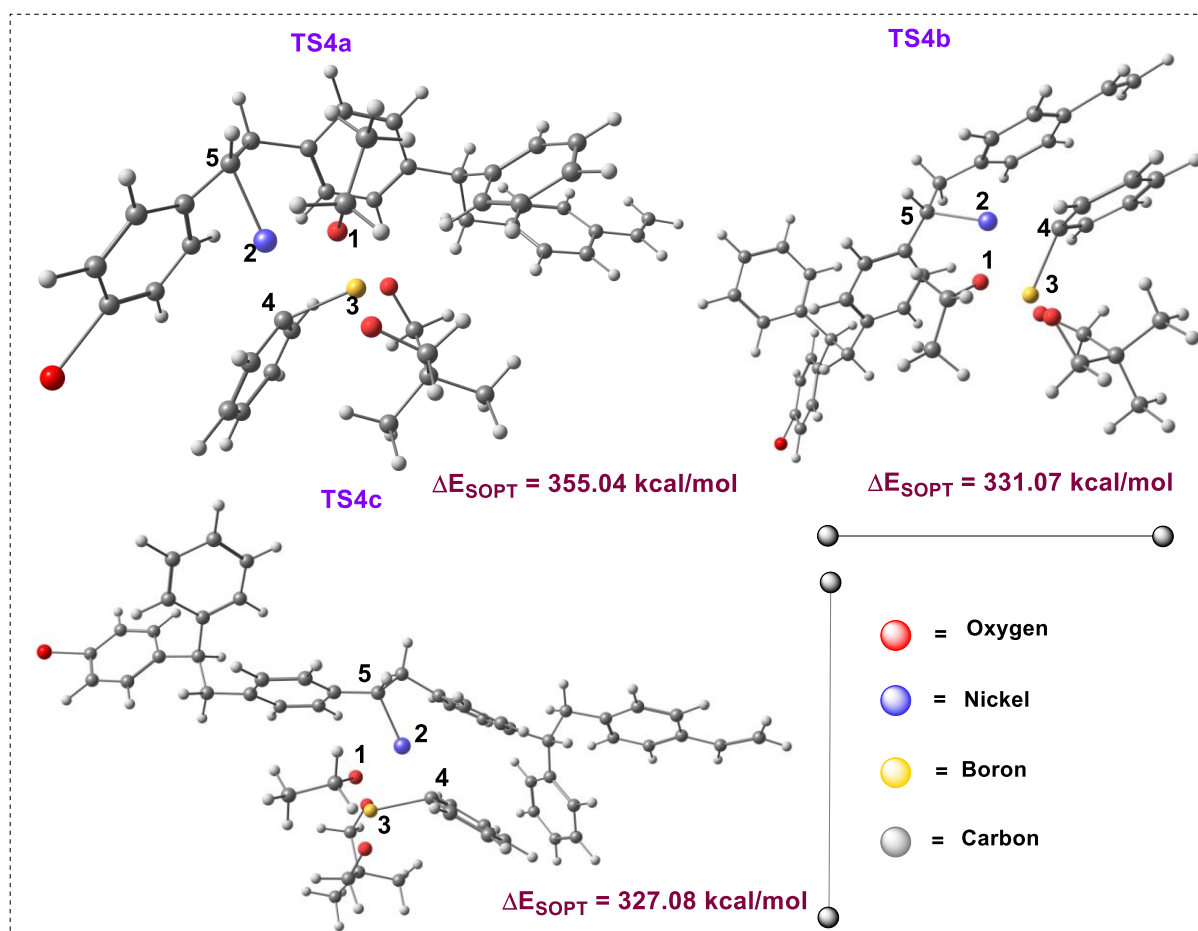

**Fig S9.** Transition states for the transmetalation steps (TS4a-4c) during the first propagation.

NBO analysis revealed that some of the significant donor-acceptor interactions are from the lone pair orbital of oxygen to the lone vacant orbital of nickel ( $LP(O1) \rightarrow LV(Ni2)$ ) and to the lone vacant orbital of boron ( $LP(O1) \rightarrow LV(B3)$ ) (Fig S9). Another interaction is from the bonding orbital of the B-C bond to the lone vacant orbital of nickel ( $BD(C4-B3) \rightarrow LV(Ni2)$ ) and to the anti-bonding orbital of the Ni-C bond ( $BD(C4-B3) \rightarrow BD^*(Ni2-C5)$ ). The overall SOPT energy is higher for TS4a, which supports a lower activation barrier for the corresponding transition state.

## 2. For the second propagation

We have also conducted NBO analysis of the reductive elimination transition state (TS5d-TS5g) for different possibilities of second propagation, due to the large variation in energy across the transition states. Some of the significant donor-acceptor interactions are summarised in the Table S6.

**Table S6:** Summary of the favourable donor-acceptor interactions for the reductive elimination transition state (TS5d-TS5g) during the first propagation. The donor-acceptor interaction

energies are calculated using second-order perturbation theory (SOPT), and the orbitals involved in the reaction are provided.

| Interactions                       | <b>TS5d</b><br><b><math>\Delta E(\text{SOPT})</math></b><br><b>kcal/mol</b> | <b>TS5e</b><br><b><math>\Delta E(\text{SOPT})</math></b><br><b>kcal/mol</b> | <b>TS5f</b><br><b><math>\Delta E(\text{SOPT})</math></b><br><b>kcal/mol</b> | <b>TS5g</b><br><b><math>\Delta E(\text{SOPT})</math></b><br><b>kcal/mol</b> |
|------------------------------------|-----------------------------------------------------------------------------|-----------------------------------------------------------------------------|-----------------------------------------------------------------------------|-----------------------------------------------------------------------------|
| BD(C1-C2) $\rightarrow$ LV(Ni3)    | 67.58                                                                       | 31.14                                                                       | 36.17                                                                       | 26.02                                                                       |
| BD(C4-C5) $\rightarrow$ LV(Ni3)    | 34.41                                                                       | 12.73                                                                       | 31.32                                                                       | 15.74                                                                       |
| LP(Ni3) $\rightarrow$ BD*(C1-C2)   | 37.18                                                                       | 21.03                                                                       | 27.60                                                                       | 16.47                                                                       |
| BD(C1-C2)<br>$\rightarrow$ RY(Ni3) | 24.96                                                                       | 16.08                                                                       | 15.86                                                                       | 7.16                                                                        |
| LP(C5) $\rightarrow$ BD*(C4-C5)    | 32.38                                                                       | -                                                                           | -                                                                           | -                                                                           |
| <b>Total</b>                       | 196.51                                                                      | 80.98                                                                       | 110.95                                                                      | 65.39                                                                       |

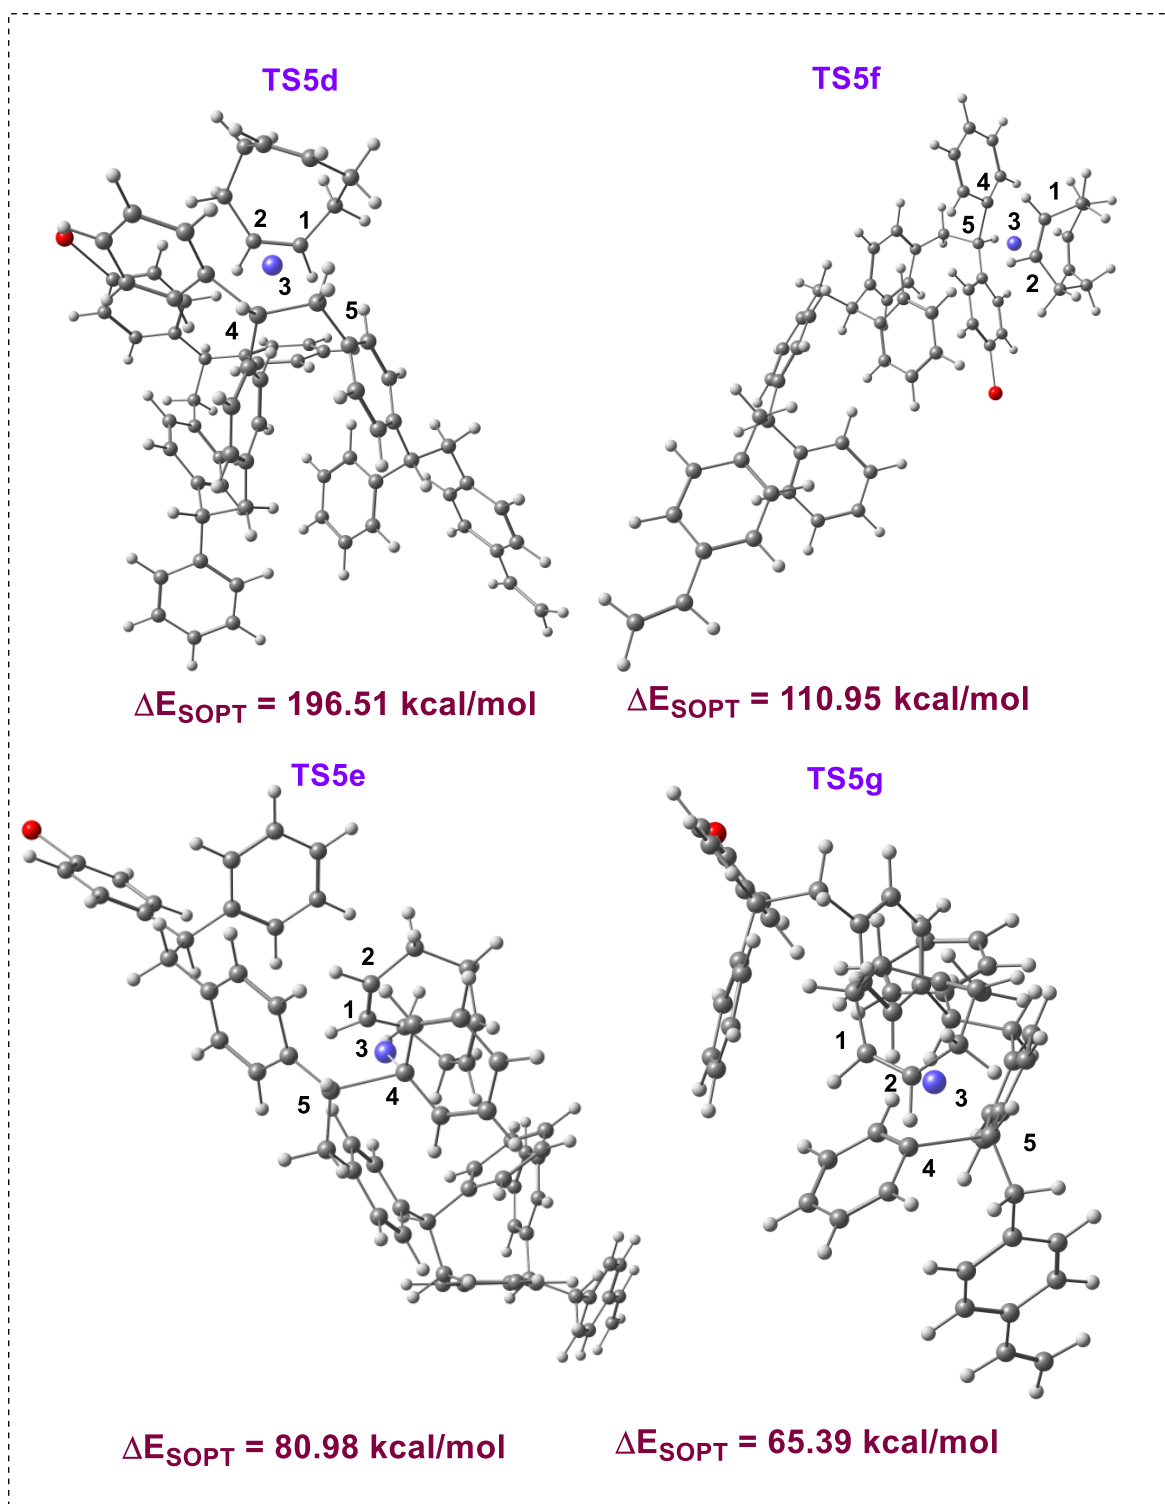

**Fig S10.** Transition states for the reductive elimination step (TS5d-TS5g) during the second propagation.

NBO analysis revealed that some of the significant donor-acceptor interactions are from the bonding orbital of the C-C bond to the lone vacant orbital of nickel ( $\text{BD}(\text{C1-C2}) \rightarrow \text{LV}(\text{Ni3})$ ),

BD(C4-C5)  $\rightarrow$  LV(Ni3)) and to the Rydberg state of nickel (BD(C1-C2)  $\rightarrow$  RY(Ni3)), for the transition states TS5d-TS5g (Figure S10). Another interaction is from the lone pair orbital of nickel to the anti-bonding orbital of the C-C bond (LP(Ni3)  $\rightarrow$  BD\*(C1-C2)). An additional interaction was observed from the lone pair orbital of the carbon atom to the lone vacant orbital of nickel (BD(C4-B3)  $\rightarrow$  LV(Ni2)) and to the anti-bonding orbital of the C-C bond (LP(C5)  $\rightarrow$  BD\*(C4-C5)). The overall SOPT energy is lowest for TS5g, which supports a higher activation barrier for the corresponding transition state, as supported by the SOPT values and space-filling model (Figure S10). The key donor-acceptor orbital interactions (BD (C1-C2)  $\rightarrow$  LV Ni) in transition states **TS5g** and space-filling model is provided in Fig S11.

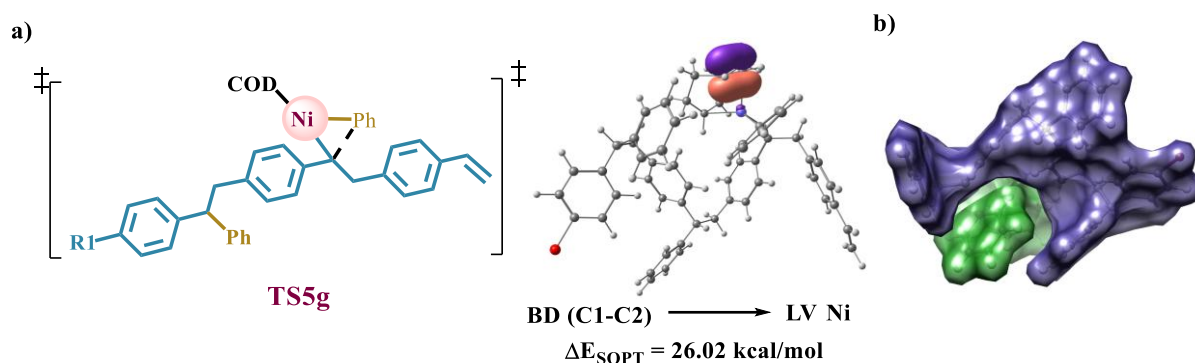

**Fig S11.** Natural Bond Orbital (NBO) analysis illustrating the key donor-acceptor orbital interactions (BD (C1-C2)  $\rightarrow$  LV Ni) in transition states **TS5g**. The interacting orbitals are visualised using isosurface plots (0.05 au), with the corresponding second-order perturbation theory (SOPT) stabilisation energy in kcal mol<sup>-1</sup> indicating the strength of the donor-acceptor interaction. BD stands for Bonding Orbital, whereas LV denotes Lone Vacant Orbital. Space-filling models of the **TS5g** is also provided. The blue surface represents the Ni-center with the aryl backbone; the green surface represents the COD ligand.

## References

1. Gaussian 16, Revision C.01, M. J. Frisch, G. W. Trucks, H. B. Schlegel, G. E. Scuseria, M. A. Robb, J. R. Cheeseman, G. Scalmani, V. Barone, G. A. Petersson, H. Nakatsuji, X. Li, M. Caricato, A. V. Marenich, J. Bloino, B. G. Janesko, R. Gomperts, B. Mennucci, H. P. Hratchian, J. V. Ortiz, A. F. Izmaylov, J. L. Sonnenberg, D. Williams-Young, F. Ding, F. Lipparini, F. Egidi, J. Goings, B. Peng, A. Petrone, T. Henderson, D. Ranasinghe, V. G. Zakrzewski, J. Gao, N. Rega, G. Zheng, W. Liang, M. Hada, M. Ehara, K. Toyota, R. Fukuda, J. Hasegawa, M. Ishida, T. Nakajima, Y. Honda, O. Kitao, H. Nakai, T. Vreven, K. Throssell, J. A. Montgomery, Jr., J. E. Peralta, F. Ogliaro, M. J. Bearpark, J. J. Heyd, E. N. Brothers, K. N. Kudin, V. N. Staroverov, T. A. Keith, R. Kobayashi, J. Normand, K. Raghavachari, A. P. Rendell, J. C. Burant, S. S. Iyengar, J. Tomasi, M. Cossi, J. M. Millam, M. Klene, C. Adamo, R. Cammi, J. W. Ochterski, R. L. Martin, K. Morokuma, O. Farkas, J. B. Foresman and D. J. Fox, Gaussian, Inc., Wallingford CT (2016).
2. A. D. Becke, *J. Chem. Phys.*, 1993, **98**, 5648–5652.
3. C. Lee, W. Yang and R. G. Parr, *Phys. Rev. B Condens. Matter*, 1988, **37**, 785–789.
4. S. Grimme, S. Ehrlich and L. Goerigk, *J. Comput. Chem.*, 2011, **32**, 1456–1465.
5. M. Dolg, U. Wedig, H. Stoll and H. Preuss, *J. Chem. Phys.*, 1987, **86**, 866–872.
6. P. C. Hariharan and J. A. Pople, *Theoret. Chim. Acta*, 1973, **28**, 213–222.
7. K. Fukui, *Acc. Chem. Res.*, 1981, **14**, 363–368.
8. Y. Zhao and D. G. Truhlar, *Theor. Chem. Acc.*, 2008, **120**, 215–241.
9. M. J. Frisch, J. A. Pople and J. S. Binkley, *J. Chem. Phys.*, 1984, **80**, 3265–3269.
10. A. V. Marenich, C. J. Cramer and D. G. Truhlar, *J. Phys. Chem. B*, 2009, **113**, 6378–6396.
11. I. Fernández and F. M. Bickelhaupt, *Chem. Soc. Rev.*, **2014**, 43, 4953–4967.
12. (a) P. R. Horn, Y. Mao and M. Head-Gordon, *Phys. Chem. Chem. Phys.*, 2016, **18**, 23067–23079. (b) M. Hopffgarten and G. Frenking, *Wiley Interdiscip. Rev. Comput. Mol. Sci.*, **2012**, 2, 43–62.
13. E. Epifanovsky, A. T. B. Gilbert, X. Feng, J. Lee, Y. Mao, N. Mardirossian, P. Pokhilko, A. F. White, M. P. Coons, A. L. Dempwolff, Z. Gan, D. Hait, P. R. Horn, L. D. Jacobson, I. Kaliman, J. Kussmann, A. W. Lange, K. U. Lao, D. S. Levine, J. Liu, S. C. McKenzie, A. F. Morrison, K. D. Nanda, F. Plasser, D. R. Rehn, M. L. Vidal, Z.-Q. You, Y. Zhu, B. Alam, B. J. Albrecht, A. Aldossary, E. Alguire, J. H. Andersen, V. Athavale, D. Barton, K. Begam, A. Behn, N. Bellonzi, Y. A. Bernard, E. J. Berquist, H. G. A. Burton, A. Carreras, K. Carter-Fenk, R. Chakraborty, A. D. Chien, K. D. Closser, V. Cofer-Shabica, S. Dasgupta, M. de Wergifosse, J. Deng, M. Diedenhofen, H. Do, S. Ehlert, P.-T. Fang, S. Fatehi, Q. Feng, T. Friedhoff, J. Gayvert, Q. Ge, G. Gidofalvi, M. Goldey, J. Gomes, C. E. González-Espinoza, S. Gulania, A. O. Gunina, M. W. D. Hanson-Heine, P. H. P. Harbach, A. Hauser, M. F. Herbst, M. Hernández Vera, M. Hodecker, Z. C. Holden, S. Houck, X. Huang, K. Hui, B. C. Huynh, M. Ivanov, A. Jász, H. Ji, H. Jiang, B. Kaduk, S. Kähler, K. Khistyayev, J. Kim, G. Kis, P. Klunzinger, Z. Koczor-Benda, J. H. Koh, D.

- Kosenkov, L. Koulias, T. Kowalczyk, C. M. Krauter, K. Kue, A. Kunitsa, T. Kus, I. Ladj'anszki, A. Landau, K. V. Lawler, D. Lefrancois, S. Lehtola, R. R. Li, Y.-P. Li, J. Liang, M. Liebenthal, H.-H. Lin, Y.-S. Lin, F. Liu, K.-Y. Liu, M. Loipersberger, A. Luenser, A. Manjanath, P. Manohar, E. Mansoor, S. F. Manzer, S.-P. Mao, A. V. Marenich, T. Markovich, S. Mason, S. A. Maurer, P. F. McLaughlin, M. F. S. J. Menger, J.-M. Mewes, S. A. Mewes, P. Morgante, J. W. Mullinax, K. J. Oosterbaan, G. Paran, A. C. Paul, S. K. Paul, F. Pavošević, Z. Pei, S. Prager, E. I. Proynov, A. Rák, E. Ramos-Cordoba, B. Rana, A. E. Rask, A. Rettig, R. M. Richard, F. Rob, E. Rossomme, T. Scheele, M. Scheurer, M. Schneider, N. Sergueev, S. M. Sharada, W. Skomorowski, D. W. Small, C. J. Stein, Y.-C. Su, E. J. Sundstrom, Z. Tao, J. Thirman, G. J. Tornai, T. Tsuchimochi, N. M. Tubman, S. P. Veccham, O. Vydrov, J. Wenzel, J. Witte, A. Yamada, K. Yao, S. Yeganeh, S. R. Yost, A. Zech, I. Y. Zhang, X. Zhang, Y. Zhang, D. Zuev, A. Aspuru-Guzik, A. T. Bell, N. A. Besley, K. B. Bravaya, B. R. Brooks, D. Casanova, J.-D. Chai, S. Coriani, C. J. Cramer, G. Cserey, A. E. DePrince, R. A. DiStasio, A. Dreuw, B. D. Dunietz, T. R. Furlani, W. A. Goddard, S. Hammes-Schiffer, T. Head-Gordon, W. J. Hehre, C.-P. Hsu, T.-C. Jagau, Y. Jung, A. Klamt, J. Kong, D. S. Lambrecht, W. Liang, N. J. Mayhall, C. W. McCurdy, J. B. Neaton, C. Ochsenfeld, J. A. Parkhill, R. Peverati, V. A. Rassolov, Y. Shao, L. V. Slipchenko, T. Stauch, R. P. Steele, J. E. Subotnik, A. J. W. Thom, A. Tkatchenko, D. G. Truhlar, T. Van Voorhis, T. A. Wesolowski, K. B. Whaley, H. L. Woodcock, P. M. Zimmerman, S. Faraji, P. M. W. Gill, M. Head-Gordon, J. M. Herbert and A. I. Krylov, Software for the Frontiers of Quantum Chemistry: An Overview of Developments in the Q-Chem 5 Package, *J. Chem. Phys.*, 2021, **155**, 084801.
14. E. D. Glendening, C. R. Landis and F. Weinhold, *J. Comput. Chem.*, 2019, **40**, 2234–2241.
15. E. F. Pettersen, T. D. Goddard, C. C. Huang, G. S. Couch, D. M. Greenblatt, E. C. Meng and T. E. Ferrin, *J. Comput. Chem.*, 2004, **25**, 1605–1612.
16. C. Y. Legault, CYLview20; Université de Sherbrooke, 2020; <http://www.cylview.org>.
17. G. A. Zhurko and D. A. Zhurko, ChemCraft, version 1.6. <http://www.chemcraftprog.com>, 2009.

## VI. Cartesian coordinates of the optimized geometries

**M**

SCF Energy (a.u.) = -322.454657

Thermal correction to Gibbs free energy (a.u.) = 0.088666

Charge = 0, Multiplicity = 1

|    |             |             |             |
|----|-------------|-------------|-------------|
| C  | 2.13306400  | 0.22546700  | 0.00009700  |
| C  | 1.32899800  | 1.37635100  | 0.00007400  |
| C  | -0.06308800 | 1.29722700  | 0.00001100  |
| C  | -0.65644600 | 0.04086300  | 0.00002900  |
| C  | 0.10391500  | -1.12675400 | 0.00014600  |
| C  | 1.49126300  | -1.02564300 | 0.00019100  |
| H  | 1.80203700  | 2.35492900  | 0.00006700  |
| H  | -0.66886000 | 2.19610100  | -0.00000900 |
| H  | -0.37835200 | -2.09760600 | 0.00022300  |
| H  | 2.07994200  | -1.93739700 | 0.00036900  |
| C  | 3.59495200  | 0.37793200  | 0.00001100  |
| C  | 4.51151900  | -0.59743900 | -0.00026000 |
| H  | 3.94163600  | 1.41083800  | 0.00022400  |
| H  | 5.57171300  | -0.36546700 | -0.00023500 |
| H  | 4.25062500  | -1.65208300 | -0.00050000 |
| Br | -2.60753700 | -0.09478100 | -0.00005500 |

**COD**

SCF Energy (a.u.) = -312.072495

Thermal correction to Gibbs free energy (a.u.) = 0.149898

Charge = 0, Multiplicity = 1

|   |             |             |             |
|---|-------------|-------------|-------------|
| C | 0.03791400  | 1.69046600  | -0.22985600 |
| C | -1.19091500 | 1.24033600  | -0.50570700 |
| C | -1.92102200 | 0.01840800  | -0.00960800 |
| C | -1.09048300 | -1.08809400 | 0.67172300  |
| C | -0.03791300 | -1.69046600 | -0.22985800 |
| C | 1.19091500  | -1.24033600 | -0.50570800 |
| C | 1.92102200  | -0.01840800 | -0.00960700 |
| C | 1.09048300  | 1.08809300  | 0.67172500  |
| H | 0.34664800  | 2.60144200  | -0.74292800 |

|   |             |             |             |
|---|-------------|-------------|-------------|
| H | -1.78131300 | 1.84073700  | -1.19934100 |
| H | -2.44545700 | -0.42443400 | -0.86877500 |
| H | -2.71958300 | 0.33657100  | 0.67942900  |
| H | -0.65545300 | -0.71179900 | 1.59972500  |
| H | -1.78489500 | -1.88198300 | 0.97258100  |
| H | -0.34664800 | -2.60144100 | -0.74293200 |
| H | 1.78131400  | -1.84073600 | -1.19934300 |
| H | 2.44545700  | 0.42443500  | -0.86877400 |
| H | 2.71958200  | -0.33657200 | 0.67943000  |
| H | 0.65545200  | 0.71179700  | 1.59972700  |
| H | 1.78489500  | 1.88198200  | 0.97258400  |

### **KBr**

SCF Energy (a.u.) = -613.387919

Thermal correction to Gibbs free energy (a.u.) = -0.024226

Charge = 0, Multiplicity = 1

|    |            |            |             |
|----|------------|------------|-------------|
| K  | 0.00000000 | 0.00000000 | -1.89524100 |
| Br | 0.00000000 | 0.00000000 | 1.02884500  |

### **KOEt**

SCF Energy (a.u.) = -754.412228

Thermal correction to Gibbs free energy (a.u.) = 0.038043

Charge = 0, Multiplicity = 1

|   |             |             |             |
|---|-------------|-------------|-------------|
| K | -1.95120600 | -0.13916700 | -0.00007400 |
| O | 0.22345200  | 0.42109800  | 0.00049000  |
| C | 1.56802400  | 0.63937000  | -0.00025800 |
| C | 2.38535800  | -0.66808100 | -0.00001500 |
| H | 1.91541000  | 1.23245500  | 0.88322300  |
| H | 1.91457400  | 1.23205400  | -0.88432200 |
| H | 3.47025400  | -0.48741800 | -0.00040200 |
| H | 2.13263300  | -1.26434200 | 0.88755900  |
| H | 2.13213200  | -1.26510100 | -0.88693500 |

### **1**

SCF Energy (a.u.) = -603.699862

Thermal correction to Gibbs free energy (a.u.) = 0.207918

Charge = 0, Multiplicity = 1

|   |             |             |             |
|---|-------------|-------------|-------------|
| C | -4.35311300 | 0.00006800  | 0.18177800  |
| C | -3.65791700 | 1.20949400  | 0.10700100  |
| C | -2.27171500 | 1.20554200  | -0.04186700 |
| C | -1.55377100 | -0.00007900 | -0.11866000 |
| C | -2.27183800 | -1.20559400 | -0.04180100 |
| C | -3.65806700 | -1.20941400 | 0.10706900  |
| H | -5.43391000 | 0.00014300  | 0.29784500  |
| H | -4.19773700 | 2.15108600  | 0.16481100  |
| H | -1.72944800 | 2.14509300  | -0.10003100 |
| H | -1.72971300 | -2.14522800 | -0.09993100 |
| H | -4.19795000 | -2.15096200 | 0.16501100  |
| C | 2.07147000  | 1.23350000  | -0.48614000 |
| C | 2.07152400  | -1.23348200 | -0.48621900 |
| C | 2.75430800  | 0.00000900  | 0.12319100  |
| H | 2.31297800  | 1.30662500  | -1.55578800 |
| H | 2.42704300  | -2.14908900 | -0.00025900 |
| B | -0.00399300 | -0.00003900 | -0.28132700 |
| O | 0.65387500  | 1.20108800  | -0.34056900 |
| O | 0.65393200  | -1.20112900 | -0.34071600 |
| H | 2.42697200  | 2.14910100  | -0.00016000 |
| H | 2.31308100  | -1.30656000 | -1.55585900 |
| C | 4.24003900  | 0.00005600  | -0.25495000 |
| H | 4.37869300  | 0.00013500  | -1.34263500 |
| H | 4.74495600  | 0.88459900  | 0.15027200  |
| H | 4.74497400  | -0.88453500 | 0.15014400  |
| C | 2.59703400  | -0.00004900 | 1.65263700  |
| H | 3.07189200  | -0.88678100 | 2.08782300  |
| H | 3.07178700  | 0.88670700  | 2.08788600  |
| H | 1.54616700  | -0.00012500 | 1.95556300  |

2

SCF Energy (a.u.) = -526.524648

Thermal correction to Gibbs free energy (a.u.) = 0.190408

Charge = 0, Multiplicity = 1

|   |             |             |             |
|---|-------------|-------------|-------------|
| C | 1.54268800  | 1.27611300  | 0.22679900  |
| C | 0.96832900  | -0.73677000 | -1.07946000 |
| C | 1.86746900  | -0.21561300 | 0.05098600  |
| H | 1.87986900  | 1.83642200  | -0.65738700 |
| H | 1.06625000  | -1.82374900 | -1.17964200 |
| B | -0.76277900 | 0.66365200  | -0.13080800 |
| O | 0.15448600  | 1.51682200  | 0.42474500  |
| O | -0.40964300 | -0.45556900 | -0.85069700 |
| H | 2.07034700  | 1.68166500  | 1.09762300  |
| H | 1.26888200  | -0.28423000 | -2.03517300 |
| C | 3.33771700  | -0.37430900 | -0.35318600 |
| H | 3.56026900  | 0.16410000  | -1.28211400 |
| H | 4.00028600  | 0.01367000  | 0.42904800  |
| H | 3.58839600  | -1.43043500 | -0.50617500 |
| C | 1.59035100  | -0.98319600 | 1.35395800  |
| H | 1.80312100  | -2.05068100 | 1.22480200  |
| H | 2.22483500  | -0.60643800 | 2.16421400  |
| H | 0.54882000  | -0.88434300 | 1.67255100  |
| O | -2.07702500 | 0.95437900  | 0.07420300  |
| C | -3.09543400 | 0.07647900  | -0.40429300 |
| C | -3.31116200 | -1.09145900 | 0.54945300  |
| H | -2.83903200 | -0.29090300 | -1.40463200 |
| H | -4.00495500 | 0.68101000  | -0.48467700 |
| H | -4.14385900 | -1.71803400 | 0.20879300  |
| H | -2.41113100 | -1.71272600 | 0.59926000  |
| H | -3.54049200 | -0.72610200 | 1.55600700  |

**im1**

SCF Energy (a.u.) = -805.560571

Thermal correction to Gibbs free energy (a.u.) = 0.258240

Charge = 0, Multiplicity = 1

|    |             |             |             |
|----|-------------|-------------|-------------|
| Ni | -0.59468300 | -0.20919000 | -0.25209600 |
|----|-------------|-------------|-------------|

|   |             |             |             |
|---|-------------|-------------|-------------|
| C | -1.77722300 | -0.51714600 | 1.52118800  |
| C | -2.48465900 | 0.22311100  | 0.60424000  |
| C | -3.48098400 | -0.29299600 | -0.41227900 |
| C | -3.10538400 | -1.65180400 | -1.06036100 |
| C | -1.62586000 | -1.76757600 | -1.36698000 |
| C | -0.67221200 | -2.29973300 | -0.53504700 |
| C | -0.88310100 | -2.83086400 | 0.86684000  |
| C | -1.88568600 | -2.01519300 | 1.72965700  |
| H | -1.20708400 | 0.03227500  | 2.26723400  |
| H | -2.44392900 | 1.30606800  | 0.70230000  |
| H | -3.56104000 | 0.46296400  | -1.20245400 |
| H | -4.48297700 | -0.36888700 | 0.03683000  |
| H | -3.41964900 | -2.47814700 | -0.41769500 |
| H | -3.67405800 | -1.75873000 | -1.99076600 |
| H | -1.32616500 | -1.53989200 | -2.38909200 |
| H | 0.31590500  | -2.48448200 | -0.95293400 |
| H | 0.09317700  | -2.82668700 | 1.36411800  |
| H | -1.20671400 | -3.88228500 | 0.83496000  |
| H | -2.90867300 | -2.34592600 | 1.53236400  |
| H | -1.69124300 | -2.24309400 | 2.78332300  |
| C | 0.69312900  | 1.16748200  | 0.01795400  |
| C | 0.98437400  | 0.56884600  | -1.26114500 |
| C | 2.13598600  | -0.26309700 | -1.38932300 |
| C | 2.91407400  | -0.61296900 | -0.30058900 |
| C | 2.57554300  | -0.05088700 | 0.97427300  |
| C | 1.54329500  | 0.83981900  | 1.12586800  |
| H | 0.54797100  | 0.99229700  | -2.16319500 |
| H | 2.40521800  | -0.62794300 | -2.37853300 |
| H | 3.17091500  | -0.31105900 | 1.84396000  |
| H | 1.34577400  | 1.29489400  | 2.09149200  |
| C | 4.05477000  | -1.51312200 | -0.48486100 |
| C | 4.89678300  | -1.96864900 | 0.45356300  |
| H | 4.21080900  | -1.83680000 | -1.51431000 |
| H | 5.71078800  | -2.63825600 | 0.19472700  |

|    |             |             |            |
|----|-------------|-------------|------------|
| H  | 4.81353300  | -1.69633300 | 1.50193500 |
| Br | -0.09538600 | 3.04902900  | 0.05761200 |

### TS1

SCF Energy (a.u.) = -805.557090

Thermal correction to Gibbs free energy (a.u.) = 0.259425

Charge = 0, Multiplicity = 1

|    |             |             |             |
|----|-------------|-------------|-------------|
| Ni | -0.70523600 | -0.06141900 | -0.26876900 |
| C  | -0.59298600 | -1.52269600 | 1.27835900  |
| C  | -1.50176100 | -0.54546700 | 1.63310100  |
| C  | -3.00082400 | -0.58375000 | 1.42249800  |
| C  | -3.43867000 | -1.20146900 | 0.06831000  |
| C  | -2.51636300 | -0.84278800 | -1.08370500 |
| C  | -1.44787400 | -1.59211200 | -1.52283700 |
| C  | -0.91074900 | -2.85891100 | -0.88925200 |
| C  | -0.94104900 | -2.86684800 | 0.66266700  |
| H  | 0.42774200  | -1.41392800 | 1.63740000  |
| H  | -1.14605800 | 0.26024000  | 2.27246300  |
| H  | -3.36046800 | 0.45024600  | 1.46783400  |
| H  | -3.50137600 | -1.11992800 | 2.24369000  |
| H  | -3.51446900 | -2.28867900 | 0.15416400  |
| H  | -4.44867400 | -0.84609300 | -0.16411500 |
| H  | -2.84521900 | -0.02506900 | -1.72430300 |
| H  | -1.02984100 | -1.34825900 | -2.49815700 |
| H  | 0.12884000  | -2.96981000 | -1.21825000 |
| H  | -1.44965400 | -3.74047700 | -1.26923400 |
| H  | -1.92013900 | -3.19822400 | 1.01887600  |
| H  | -0.22210700 | -3.61494400 | 1.01458400  |
| C  | 0.74558600  | 1.05871300  | 0.02411100  |
| C  | 1.17871200  | 0.60621600  | -1.25090900 |
| C  | 2.41649100  | -0.06888300 | -1.31467900 |
| C  | 3.23740900  | -0.20970100 | -0.19768700 |
| C  | 2.82439000  | 0.40327700  | 1.02267000  |
| C  | 1.62198400  | 1.06197500  | 1.13656300  |

|    |             |             |             |
|----|-------------|-------------|-------------|
| H  | 0.67445500  | 0.90604900  | -2.16197600 |
| H  | 2.76089300  | -0.44339700 | -2.27629100 |
| H  | 3.47018600  | 0.34172900  | 1.89338000  |
| H  | 1.30937100  | 1.50682500  | 2.07513500  |
| C  | 4.50702900  | -0.92945600 | -0.32670100 |
| C  | 5.41467100  | -1.16602800 | 0.63103500  |
| H  | 4.70788400  | -1.31163800 | -1.32769700 |
| H  | 6.32248100  | -1.71958200 | 0.41359000  |
| H  | 5.29449700  | -0.82402600 | 1.65515800  |
| Br | -0.78536300 | 2.59046500  | -0.09834200 |

## im2

SCF Energy (a.u.) = -805.594980

Thermal correction to Gibbs free energy (a.u.) = 0.259842

Charge = 0, Multiplicity = 1

|    |             |             |             |
|----|-------------|-------------|-------------|
| Ni | -0.79873800 | 0.10660400  | -0.00686100 |
| C  | -1.10782500 | -1.94611000 | -0.46420500 |
| C  | -1.00499700 | -1.75682400 | 0.90191200  |
| C  | -2.12257900 | -1.65470600 | 1.91408900  |
| C  | -3.43004800 | -1.01751400 | 1.39051700  |
| C  | -3.16554700 | 0.21626400  | 0.56139400  |
| C  | -3.02438700 | 0.27009600  | -0.78686100 |
| C  | -3.04374800 | -0.87979200 | -1.76706200 |
| C  | -2.38688900 | -2.18040900 | -1.24958300 |
| H  | -0.18343800 | -2.17915100 | -0.98573600 |
| H  | -0.01819000 | -1.89024400 | 1.33788700  |
| H  | -1.74936700 | -1.05849000 | 2.75552400  |
| H  | -2.33384600 | -2.65442000 | 2.32320400  |
| H  | -4.01062800 | -1.74620000 | 0.82088000  |
| H  | -4.04602800 | -0.73953100 | 2.25242300  |
| H  | -3.12878500 | 1.16192000  | 1.09748900  |
| H  | -2.92707000 | 1.25824900  | -1.22872300 |
| H  | -2.50995200 | -0.55103100 | -2.66586400 |
| H  | -4.07462400 | -1.08931200 | -2.08754100 |

|    |             |             |             |
|----|-------------|-------------|-------------|
| H  | -3.09479600 | -2.75139700 | -0.64357900 |
| H  | -2.14954700 | -2.81136600 | -2.11248500 |
| C  | 1.07431300  | -0.05831500 | -0.07995300 |
| C  | 1.69126600  | -0.28692000 | -1.31209800 |
| C  | 3.07457600  | -0.46495300 | -1.38336000 |
| C  | 3.87832400  | -0.42433900 | -0.23372400 |
| C  | 3.24404200  | -0.18119700 | 0.99790100  |
| C  | 1.86615400  | 0.00249100  | 1.07371100  |
| H  | 1.10560100  | -0.30959700 | -2.22819100 |
| H  | 3.54163100  | -0.63784000 | -2.35077800 |
| H  | 3.83469900  | -0.12135800 | 1.90762200  |
| H  | 1.41089500  | 0.21889200  | 2.03685500  |
| C  | 5.32700000  | -0.62944200 | -0.36643200 |
| C  | 6.23796100  | -0.67491800 | 0.61405000  |
| H  | 5.67151600  | -0.75913000 | -1.39259900 |
| H  | 7.28909900  | -0.83119000 | 0.39279700  |
| H  | 5.97890800  | -0.55857000 | 1.66283100  |
| Br | -0.53963200 | 2.43041100  | 0.01252300  |

**im3**

SCF Energy (a.u.) = -815.953499

Thermal correction to Gibbs free energy (a.u.) = 0.195257

Charge = 0, Multiplicity = 1

|    |             |             |             |
|----|-------------|-------------|-------------|
| Ni | 2.34479500  | -0.21646300 | 0.21030700  |
| C  | 1.25957900  | 1.27453000  | 0.28325500  |
| C  | 1.62839400  | 2.41620100  | 1.00035700  |
| C  | 0.94385500  | 3.61512000  | 0.79084200  |
| C  | -0.13341900 | 3.69481900  | -0.10646200 |
| C  | -0.50534100 | 2.52734800  | -0.79943700 |
| C  | 0.17063800  | 1.32810300  | -0.59848200 |
| H  | 2.45228600  | 2.38697600  | 1.70932400  |
| H  | 1.24519100  | 4.50545200  | 1.33795900  |
| H  | -1.33677300 | 2.55220800  | -1.49730700 |
| H  | -0.15417200 | 0.43805100  | -1.13127400 |
| C  | -0.82811500 | 4.97931200  | -0.27102500 |

|    |             |             |             |
|----|-------------|-------------|-------------|
| C  | -1.87718200 | 5.23806400  | -1.06164300 |
| H  | -0.42273200 | 5.79315000  | 0.32955500  |
| H  | -2.31127500 | 6.23188100  | -1.10391200 |
| H  | -2.34007500 | 4.48413400  | -1.69214800 |
| Br | 3.90131400  | -1.44249900 | -1.00714600 |
| C  | 1.22183500  | -1.57217700 | 1.28068400  |
| C  | 1.93113900  | -0.69113200 | 2.10583200  |
| H  | 2.90510700  | -0.99002500 | 2.48715900  |
| H  | 1.43060900  | 0.10746000  | 2.64245200  |
| H  | 1.72651300  | -2.48377900 | 0.96657100  |
| C  | -0.20700200 | -1.51432300 | 0.95488400  |
| C  | -1.10276400 | -0.65477800 | 1.61111300  |
| C  | -0.68781000 | -2.32430400 | -0.08703400 |
| C  | -2.43796200 | -0.59002100 | 1.23035900  |
| H  | -0.75523600 | -0.02033300 | 2.41886200  |
| C  | -2.02077800 | -2.26553800 | -0.48694200 |
| H  | -0.00161600 | -2.98882300 | -0.60489400 |
| C  | -2.87697300 | -1.39262200 | 0.17848300  |
| H  | -3.12386200 | 0.07899900  | 1.73652600  |
| H  | -2.38277300 | -2.88422200 | -1.29970700 |
| Br | -4.74285700 | -1.28783800 | -0.37389500 |

### im3<sub>A</sub>

SCF Energy (a.u.) = -1128.041760

Thermal correction to Gibbs free energy (a.u.) = 0.372335

Charge = 0, Multiplicity = 1

|    |             |             |             |
|----|-------------|-------------|-------------|
| Ni | -1.59128800 | -0.27664800 | -0.61018900 |
| C  | -2.09968900 | -1.30988900 | 1.80649300  |
| C  | -1.04817400 | -0.47869900 | 1.97828800  |
| C  | -1.01103800 | 0.82157400  | 2.74304600  |
| C  | -2.29850300 | 1.68479800  | 2.73764000  |
| C  | -2.91392100 | 1.82646200  | 1.37276400  |
| C  | -3.84094800 | 0.99365000  | 0.87146200  |
| C  | -4.45830600 | -0.17666500 | 1.59676500  |

|    |             |             |             |
|----|-------------|-------------|-------------|
| C  | -3.48706600 | -1.11889800 | 2.37446400  |
| H  | -1.91542500 | -2.25473300 | 1.30413100  |
| H  | -0.07951900 | -0.82896600 | 1.62704000  |
| H  | -0.18921600 | 1.42289300  | 2.34626900  |
| H  | -0.74583100 | 0.60095900  | 3.78825400  |
| H  | -3.03046400 | 1.27106900  | 3.43621600  |
| H  | -2.03092000 | 2.67518400  | 3.12339000  |
| H  | -2.56276600 | 2.65207300  | 0.76286200  |
| H  | -4.23441600 | 1.19429100  | -0.12337400 |
| H  | -5.00199800 | -0.77380300 | 0.86538100  |
| H  | -5.20153600 | 0.19620700  | 2.31677400  |
| H  | -3.38647200 | -0.76506300 | 3.40543900  |
| H  | -3.96727800 | -2.10044300 | 2.43333800  |
| C  | -0.48752900 | 1.26318400  | -0.55342400 |
| C  | -1.01769500 | 2.35300300  | -1.26080500 |
| C  | -0.34502500 | 3.57339500  | -1.31441500 |
| C  | 0.89572700  | 3.75035700  | -0.67860000 |
| C  | 1.43435700  | 2.64959100  | 0.00723300  |
| C  | 0.75829100  | 1.43190700  | 0.06154800  |
| H  | -1.97296700 | 2.25821200  | -1.77528000 |
| H  | -0.78372700 | 4.40402700  | -1.86332000 |
| H  | 2.39597000  | 2.73822200  | 0.50501300  |
| H  | 1.22193600  | 0.61196000  | 0.59926700  |
| C  | 1.56643900  | 5.05458100  | -0.76602800 |
| C  | 2.73303200  | 5.40784700  | -0.21159900 |
| H  | 1.03006600  | 5.79986100  | -1.35336200 |
| H  | 3.13443700  | 6.40742400  | -0.34488100 |
| H  | 3.32790300  | 4.72682600  | 0.39088000  |
| Br | -3.42565000 | -1.84363300 | -1.15757800 |
| C  | -0.20438200 | -1.54025600 | -1.65981000 |
| C  | -0.78215300 | -0.61587300 | -2.51962300 |
| H  | -1.67838800 | -0.88187400 | -3.06819700 |
| H  | -0.22713900 | 0.24711100  | -2.86794300 |
| H  | -0.74568100 | -2.46727800 | -1.48752700 |

|    |            |             |             |
|----|------------|-------------|-------------|
| C  | 1.16368800 | -1.50473500 | -1.13208200 |
| C  | 2.16305100 | -0.68002000 | -1.67166900 |
| C  | 1.48808600 | -2.32445500 | -0.03814500 |
| C  | 3.44196500 | -0.65061600 | -1.12320500 |
| H  | 1.94152200 | -0.04947000 | -2.52522800 |
| C  | 2.75745500 | -2.29733500 | 0.53379600  |
| H  | 0.72726000 | -2.97907000 | 0.37900300  |
| C  | 3.71706000 | -1.45191200 | -0.01825000 |
| H  | 4.20680500 | -0.00799400 | -1.54330900 |
| H  | 2.99543800 | -2.92252000 | 1.38649800  |
| Br | 5.49936800 | -1.39622200 | 0.77337500  |

## TS2

SCF Energy (a.u.) = -815.945221

Thermal correction to Gibbs free energy (a.u.) = 0.197789

Charge = 0, Multiplicity = 1

|    |             |             |             |
|----|-------------|-------------|-------------|
| Ni | -1.25501400 | 1.29350600  | 0.21055300  |
| C  | -2.39155100 | -0.13512800 | 0.61860700  |
| C  | -3.72256100 | 0.18810600  | 0.91943600  |
| C  | -4.74744800 | -0.65508400 | 0.49260500  |
| C  | -4.47649400 | -1.84776900 | -0.19928400 |
| C  | -3.12958800 | -2.17898400 | -0.44799800 |
| C  | -2.09698300 | -1.35042900 | -0.02793800 |
| H  | -3.96053900 | 1.09842900  | 1.46256600  |
| H  | -5.77991500 | -0.38739200 | 0.70276800  |
| H  | -2.88674900 | -3.09773900 | -0.97259600 |
| H  | -1.06560700 | -1.62810200 | -0.22606900 |
| C  | -5.59937900 | -2.69688200 | -0.61738100 |
| C  | -5.53343300 | -3.84543000 | -1.30249300 |
| H  | -6.58138900 | -2.32436600 | -0.32816900 |
| H  | -6.43464400 | -4.39195600 | -1.56092600 |
| H  | -4.59547100 | -4.28168500 | -1.63417600 |
| Br | -0.50277800 | 3.01544200  | -1.10209800 |
| C  | 0.09263800  | 1.14052200  | 1.61697100  |

|    |             |             |             |
|----|-------------|-------------|-------------|
| C  | -1.06244000 | 0.47309300  | 2.12297200  |
| H  | -1.73171300 | 1.03350100  | 2.76957100  |
| H  | -1.00580600 | -0.58086100 | 2.36866000  |
| H  | 0.23863700  | 2.18149600  | 1.89837500  |
| C  | 1.30139500  | 0.44632400  | 1.13445700  |
| C  | 1.42760400  | -0.95276900 | 1.12799500  |
| C  | 2.37431800  | 1.21478900  | 0.65104200  |
| C  | 2.58261800  | -1.56997800 | 0.65315000  |
| H  | 0.62640800  | -1.57931100 | 1.50605300  |
| C  | 3.53489300  | 0.61515500  | 0.17361400  |
| H  | 2.27949500  | 2.29567200  | 0.62128300  |
| C  | 3.62234200  | -0.77480500 | 0.18072000  |
| H  | 2.67181500  | -2.65019500 | 0.65744800  |
| H  | 4.35187300  | 1.21868600  | -0.20420000 |
| Br | 5.24444600  | -1.63111900 | -0.48461400 |

**TS2<sub>A</sub>**

SCF Energy (a.u.) = -1128.030010

Thermal correction to Gibbs free energy (a.u.) = 0.371060

Charge = 0, Multiplicity = 1

|    |             |             |             |
|----|-------------|-------------|-------------|
| Ni | 0.92229200  | 1.09127700  | -0.87740300 |
| C  | -0.62881300 | 0.91029700  | 2.10384500  |
| C  | -0.50792700 | -0.37088700 | 1.73100500  |
| C  | 0.38696400  | -1.43080300 | 2.32869600  |
| C  | 1.75709800  | -0.96663200 | 2.89268800  |
| C  | 2.50893400  | -0.00553300 | 2.00627600  |
| C  | 2.38364500  | 1.32934800  | 1.99801100  |
| C  | 1.47806700  | 2.18642000  | 2.84799300  |
| C  | 0.10232900  | 1.58305200  | 3.23819800  |
| H  | -1.31213000 | 1.53629300  | 1.53664600  |
| H  | -1.13544200 | -0.71093500 | 0.90983600  |
| H  | 0.57417400  | -2.18403700 | 1.55647300  |
| H  | -0.15031500 | -1.96294800 | 3.12881100  |
| H  | 1.61843700  | -0.52930100 | 3.88438200  |

|    |             |             |             |
|----|-------------|-------------|-------------|
| H  | 2.37040100  | -1.86370200 | 3.04291600  |
| H  | 3.21955600  | -0.45053400 | 1.31566100  |
| H  | 3.02297100  | 1.88639400  | 1.31306600  |
| H  | 1.30168300  | 3.11585600  | 2.30083400  |
| H  | 2.00378000  | 2.47026500  | 3.77281800  |
| H  | 0.22094200  | 0.88402300  | 4.07038300  |
| H  | -0.51604100 | 2.40353700  | 3.62100300  |
| C  | 1.95901200  | -0.43548500 | -1.30125300 |
| C  | 3.30396200  | -0.08969600 | -1.50468800 |
| C  | 4.31344000  | -0.98478400 | -1.15111500 |
| C  | 4.01448500  | -2.25752800 | -0.63520300 |
| C  | 2.65719000  | -2.61674300 | -0.50721900 |
| C  | 1.64729400  | -1.72974800 | -0.85112700 |
| H  | 3.56486600  | 0.88454400  | -1.91083000 |
| H  | 5.35375400  | -0.69599600 | -1.27916800 |
| H  | 2.39206100  | -3.60048400 | -0.13205200 |
| H  | 0.60924600  | -2.02664700 | -0.74203100 |
| C  | 5.11668700  | -3.15358900 | -0.26463400 |
| C  | 5.01934100  | -4.35244000 | 0.32413700  |
| H  | 6.11025400  | -2.77078000 | -0.49518800 |
| H  | 5.90637300  | -4.93204800 | 0.55841800  |
| H  | 4.06739200  | -4.79814600 | 0.59874100  |
| Br | 0.46182700  | 3.34680700  | -0.38533100 |
| C  | -0.42928300 | 0.95265300  | -2.30555100 |
| C  | 0.68458800  | 0.24146100  | -2.82379400 |
| H  | 1.37495600  | 0.77957500  | -3.46655000 |
| H  | 0.59418100  | -0.81007100 | -3.06566200 |
| H  | -0.55555300 | 1.98750300  | -2.60699200 |
| C  | -1.61799300 | 0.30250700  | -1.72123100 |
| C  | -1.84356500 | -1.08245100 | -1.78831000 |
| C  | -2.54989400 | 1.09747600  | -1.03014500 |
| C  | -2.94560600 | -1.66495100 | -1.16531900 |
| H  | -1.16294600 | -1.72284100 | -2.33949900 |
| C  | -3.65290000 | 0.53127700  | -0.39898400 |

|    |             |             |             |
|----|-------------|-------------|-------------|
| H  | -2.37394500 | 2.16597500  | -0.95305300 |
| C  | -3.83118500 | -0.84823500 | -0.46872400 |
| H  | -3.11037400 | -2.73475300 | -1.22327800 |
| H  | -4.35335800 | 1.15168100  | 0.14789400  |
| Br | -5.35937800 | -1.65818100 | 0.43397000  |

### TS2<sub>B</sub>

SCF Energy (a.u.) = -815.940063

Thermal correction to Gibbs free energy (a.u.) = 0.197036

Charge = 0, Multiplicity = 1

|    |             |             |             |
|----|-------------|-------------|-------------|
| Ni | -1.86077500 | -1.11938600 | 0.17149100  |
| C  | -1.57414400 | 0.70057600  | 0.58959400  |
| C  | -0.89967200 | 1.40984300  | -0.41858400 |
| C  | -1.33970400 | 2.67749800  | -0.78353100 |
| C  | -2.42451300 | 3.28865200  | -0.12673300 |
| C  | -3.05139300 | 2.58338700  | 0.91758700  |
| C  | -2.62465000 | 1.31235400  | 1.29127300  |
| H  | -0.04103700 | 0.97001100  | -0.91643500 |
| H  | -0.82333900 | 3.20306600  | -1.58046500 |
| H  | -3.88421800 | 3.04437800  | 1.44258000  |
| H  | -3.11780000 | 0.79142300  | 2.10779500  |
| C  | -2.91566000 | 4.62943500  | -0.47000800 |
| C  | -2.45640200 | 5.43509600  | -1.43590000 |
| H  | -3.74667300 | 4.97864300  | 0.14163800  |
| H  | -2.89982900 | 6.41119500  | -1.60400400 |
| H  | -1.63566000 | 5.16078200  | -2.09251300 |
| Br | -2.67532000 | -2.93186800 | -0.94630800 |
| C  | -0.41347600 | -0.59307900 | 1.68308800  |
| C  | -1.06186300 | -1.88002800 | 1.70648500  |
| H  | -1.83248200 | -2.05062200 | 2.45720600  |
| H  | -0.50160900 | -2.76811000 | 1.42687000  |
| H  | -0.62565400 | 0.06187300  | 2.52326600  |
| C  | 0.96020400  | -0.43347700 | 1.14072100  |
| C  | 1.44716000  | -1.24255900 | 0.10299200  |

|    |            |             |             |
|----|------------|-------------|-------------|
| C  | 1.78880800 | 0.56801100  | 1.66144600  |
| C  | 2.73703900 | -1.06650300 | -0.39324900 |
| H  | 0.81150900 | -2.00537800 | -0.33747300 |
| C  | 3.08333100 | 0.75536100  | 1.17985900  |
| H  | 1.41736700 | 1.21416800  | 2.45232800  |
| C  | 3.53860100 | -0.06845700 | 0.15538100  |
| H  | 3.10674000 | -1.69282300 | -1.19681400 |
| H  | 3.72008300 | 1.52970700  | 1.59164500  |
| Br | 5.34367100 | 0.19009200  | -0.53997600 |

#### im4

SCF Energy (a.u.) = -815.977055

Thermal correction to Gibbs free energy (a.u.) = 0.199992

Charge = 0, Multiplicity = 1

|    |            |             |             |
|----|------------|-------------|-------------|
| Ni | 0.03350100 | -1.52054800 | -0.14885000 |
| C  | 2.44953900 | 0.23147400  | 1.24025100  |
| C  | 3.00396900 | -0.01143600 | -0.02217200 |
| C  | 3.46309700 | 1.04331800  | -0.80666000 |
| C  | 3.39538500 | 2.37401900  | -0.35855500 |
| C  | 2.86137800 | 2.60638100  | 0.92124300  |
| C  | 2.40042700 | 1.55272000  | 1.70362800  |
| H  | 3.05395100 | -1.02895000 | -0.39892800 |
| H  | 3.88375000 | 0.83550300  | -1.78728100 |
| H  | 2.80485400 | 3.61877000  | 1.30884300  |
| H  | 1.97977800 | 1.75796000  | 2.68530700  |
| C  | 3.88463500 | 3.44843400  | -1.23439900 |
| C  | 3.88390200 | 4.76321700  | -0.98263100 |
| H  | 4.28448900 | 3.10645600  | -2.18856200 |
| H  | 4.27265100 | 5.47017800  | -1.70857300 |
| H  | 3.50304900 | 5.18554500  | -0.05681500 |
| Br | 1.02926400 | -3.34003200 | -1.04017000 |
| C  | 0.42899600 | -1.31153300 | 1.70629500  |
| C  | 1.85580800 | -0.89677500 | 2.04790600  |
| H  | 2.47578700 | -1.79411900 | 1.94667200  |

|    |             |             |             |
|----|-------------|-------------|-------------|
| H  | 1.87012200  | -0.62842800 | 3.11570600  |
| H  | 0.13645000  | -2.20241500 | 2.26583800  |
| C  | -0.69340300 | -0.43749000 | 1.39430500  |
| C  | -0.54019000 | 0.50848900  | 0.33171300  |
| C  | -2.02089300 | -0.75830400 | 1.81538900  |
| C  | -1.67956000 | 1.10327900  | -0.26197500 |
| H  | 0.43308900  | 0.91087700  | 0.07983800  |
| C  | -3.12063600 | -0.15851900 | 1.24429800  |
| H  | -2.15353400 | -1.49159500 | 2.60535800  |
| C  | -2.93352200 | 0.76351100  | 0.19374500  |
| H  | -1.55216500 | 1.83456900  | -1.05176500 |
| H  | -4.12173100 | -0.40133000 | 1.58175000  |
| Br | -4.50475400 | 1.58225000  | -0.61194100 |

### im5

SCF Energy (a.u.) = -957.020830

Thermal correction to Gibbs free energy (a.u.) = 0.265688

Charge = 0, Multiplicity = 1

|    |             |             |             |
|----|-------------|-------------|-------------|
| Ni | -0.13245900 | 1.53069300  | -0.12573700 |
| C  | -2.45425200 | -0.16123400 | 1.29839500  |
| C  | -2.98119700 | 0.19917800  | 0.05083100  |
| C  | -3.51353700 | -0.76957400 | -0.79509400 |
| C  | -3.54755400 | -2.12690800 | -0.42913500 |
| C  | -3.03548200 | -2.47611700 | 0.83214400  |
| C  | -2.50222500 | -1.50813700 | 1.67808900  |
| H  | -2.94372400 | 1.23720200  | -0.26881800 |
| H  | -3.91062900 | -0.47268500 | -1.76271400 |
| H  | -3.05095700 | -3.51245000 | 1.15529500  |
| H  | -2.10030500 | -1.80362600 | 2.64446200  |
| C  | -4.11233200 | -3.10600700 | -1.36877000 |
| C  | -4.22769500 | -4.42813900 | -1.19260300 |
| H  | -4.46801200 | -2.67855700 | -2.30598000 |
| H  | -4.66363600 | -5.05754300 | -1.96192300 |
| H  | -3.89903800 | -4.93240600 | -0.28800700 |

|    |             |             |             |
|----|-------------|-------------|-------------|
| C  | -0.40037200 | 1.33710600  | 1.75200100  |
| C  | -1.79241800 | 0.87456800  | 2.17685600  |
| H  | -2.42083300 | 1.77221800  | 2.21635500  |
| H  | -1.73295600 | 0.49367700  | 3.20789200  |
| H  | -0.09314300 | 2.21960000  | 2.31826200  |
| C  | 0.72565400  | 0.47923500  | 1.39668500  |
| C  | 0.55782700  | -0.48907900 | 0.36050500  |
| C  | 2.06266100  | 0.82512300  | 1.76518400  |
| C  | 1.68561700  | -1.08308700 | -0.25626800 |
| H  | -0.41720000 | -0.90927800 | 0.14485600  |
| C  | 3.15345000  | 0.23580500  | 1.16658800  |
| H  | 2.21086600  | 1.56997100  | 2.54179400  |
| C  | 2.94805700  | -0.71186500 | 0.14376700  |
| H  | 1.54179800  | -1.83545900 | -1.02328600 |
| H  | 4.16076700  | 0.50113100  | 1.46717900  |
| Br | 4.50824800  | -1.52144900 | -0.70250400 |
| O  | -1.04258700 | 2.80450200  | -0.90481000 |
| C  | -0.75882900 | 4.18337100  | -0.83405000 |
| H  | -1.08978500 | 4.58206500  | 0.13999900  |
| H  | 0.32185400  | 4.38546300  | -0.91560900 |
| C  | -1.49651900 | 4.91269900  | -1.95399800 |
| H  | -2.57492300 | 4.73852500  | -1.87262900 |
| H  | -1.31010200 | 5.99271800  | -1.90688200 |
| H  | -1.16430800 | 4.54311500  | -2.93025000 |

### im6

SCF Energy (a.u.) = -1560.749058

Thermal correction to Gibbs free energy (a.u.) = 0.502484

Charge = 0, Multiplicity = 1

|    |             |             |             |
|----|-------------|-------------|-------------|
| Ni | -0.07632100 | -0.64553900 | 1.02709800  |
| C  | 0.16478200  | 2.49504200  | 1.80732400  |
| C  | 1.17877900  | 2.16199300  | 0.90102200  |
| C  | 1.41263600  | 2.94783900  | -0.22285100 |
| C  | 0.65267200  | 4.10087100  | -0.48187200 |

|    |             |             |             |
|----|-------------|-------------|-------------|
| C  | -0.34306400 | 4.44849500  | 0.44797200  |
| C  | -0.57852800 | 3.65876200  | 1.56968600  |
| H  | 1.77006300  | 1.26588300  | 1.04698300  |
| H  | 2.19007700  | 2.64486400  | -0.91867100 |
| H  | -0.94152500 | 5.34113400  | 0.29273000  |
| H  | -1.36761100 | 3.93681300  | 2.26458300  |
| C  | 0.92723000  | 4.87861600  | -1.69813600 |
| C  | 0.26573200  | 5.95436700  | -2.14316500 |
| H  | 1.76679400  | 4.51022200  | -2.28774200 |
| H  | 0.56027900  | 6.45075100  | -3.06245000 |
| H  | -0.58539700 | 6.37936500  | -1.61814500 |
| C  | -0.71654200 | 0.20468400  | 2.61965100  |
| C  | -0.15183400 | 1.58279800  | 2.97116600  |
| H  | 0.76220500  | 1.40919500  | 3.55162900  |
| H  | -0.84973000 | 2.09361900  | 3.65133000  |
| H  | -0.66785400 | -0.46376300 | 3.48242200  |
| C  | -1.93377700 | 0.00562200  | 1.83413300  |
| C  | -2.14119800 | 0.69914600  | 0.61319300  |
| C  | -2.82640800 | -1.06433900 | 2.14167600  |
| C  | -3.22303800 | 0.37468200  | -0.22381200 |
| H  | -1.52407200 | 1.54760200  | 0.35189100  |
| C  | -3.88398300 | -1.38808900 | 1.31627700  |
| H  | -2.66625500 | -1.62625900 | 3.05753100  |
| C  | -4.06952700 | -0.65223800 | 0.13545700  |
| H  | -3.37956500 | 0.92980600  | -1.13993200 |
| H  | -4.55922000 | -2.19742100 | 1.57008400  |
| Br | -5.55197800 | -1.13114700 | -1.04389300 |
| C  | -1.82200400 | -1.35769900 | -2.35090100 |
| C  | -1.38560700 | -2.33375000 | -1.46134900 |
| C  | -0.11649500 | -2.22722500 | -0.87067700 |
| C  | 0.72708300  | -1.12540200 | -1.15110800 |
| C  | 0.23128200  | -0.12142600 | -2.01837800 |
| C  | -1.01289600 | -0.24524700 | -2.62360500 |
| H  | -2.79623400 | -1.45052600 | -2.82164700 |

|   |             |             |             |
|---|-------------|-------------|-------------|
| H | -2.01749100 | -3.18788200 | -1.23613300 |
| H | 0.26679500  | -3.03620700 | -0.25579100 |
| H | 0.85888700  | 0.73789700  | -2.23210900 |
| H | -1.36228100 | 0.52243700  | -3.30926300 |
| C | 4.29219000  | -2.43854100 | -0.62247000 |
| C | 4.33573200  | 0.03118700  | -0.48353300 |
| C | 5.02079800  | -1.18247400 | -1.12913300 |
| H | 4.51066100  | -2.59923200 | 0.43949100  |
| H | 4.74754200  | 0.96447300  | -0.88373600 |
| B | 2.25080200  | -1.14393700 | -0.73764700 |
| O | 2.88199200  | -2.35917300 | -0.79157000 |
| O | 2.93389900  | 0.05141600  | -0.73090100 |
| H | 4.63456300  | -3.32232500 | -1.17294100 |
| H | 4.50336100  | 0.02839100  | 0.60206300  |
| C | 6.48823100  | -1.23381100 | -0.68919700 |
| H | 6.57844200  | -1.28742000 | 0.40230600  |
| H | 6.99137400  | -2.11099700 | -1.11254400 |
| H | 7.03001300  | -0.34375500 | -1.03020600 |
| C | 4.92536900  | -1.08971000 | -2.66026100 |
| H | 5.42322700  | -0.18331200 | -3.02450500 |
| H | 5.40936200  | -1.95393400 | -3.12953200 |
| H | 3.88534400  | -1.06222500 | -2.99719700 |
| O | 1.55545800  | -1.26686600 | 1.53074700  |
| C | 2.14461400  | -1.02152800 | 2.77571700  |
| C | 3.42971100  | -1.83075000 | 2.94077000  |
| H | 1.45961400  | -1.29251700 | 3.59648900  |
| H | 2.38546500  | 0.04947100  | 2.90820900  |
| H | 3.82518500  | -1.71887700 | 3.95805900  |
| H | 3.23605300  | -2.89231500 | 2.75274500  |
| H | 4.20166400  | -1.49231500 | 2.24198400  |

### TS3

SCF Energy (a.u.) = -1560.742981

Thermal correction to Gibbs free energy (a.u.) = 0.502071

Charge = 0, Multiplicity = 1

|    |             |             |             |
|----|-------------|-------------|-------------|
| Ni | -0.03378400 | -0.77714600 | 0.97547100  |
| C  | 0.59126000  | 2.51269300  | 1.64785800  |
| C  | 1.24632500  | 2.11912500  | 0.47553600  |
| C  | 1.34211600  | 2.98796600  | -0.60687800 |
| C  | 0.81040000  | 4.28775000  | -0.55753900 |
| C  | 0.18678000  | 4.69014600  | 0.63639800  |
| C  | 0.08196900  | 3.81716800  | 1.71540500  |
| H  | 1.67726300  | 1.12940800  | 0.40038800  |
| H  | 1.83503700  | 2.64495900  | -1.51317600 |
| H  | -0.22425600 | 5.69155900  | 0.72252600  |
| H  | -0.42039500 | 4.14680200  | 2.62250200  |
| C  | 0.93142200  | 5.15616000  | -1.73672700 |
| C  | 0.48090700  | 6.40942600  | -1.87561800 |
| H  | 1.45040000  | 4.70002200  | -2.57978500 |
| H  | 0.62931500  | 6.95702800  | -2.80100700 |
| H  | -0.04643500 | 6.93568000  | -1.08462300 |
| C  | -0.42007100 | 0.29395900  | 2.51326300  |
| C  | 0.40608100  | 1.54191700  | 2.79408400  |
| H  | 1.38911000  | 1.18316300  | 3.12399900  |
| H  | -0.02878300 | 2.07880300  | 3.65076300  |
| H  | -0.39192000 | -0.38918700 | 3.36804800  |
| C  | -1.70405900 | 0.26197400  | 1.80899100  |
| C  | -2.22706600 | 1.29116300  | 0.97436400  |
| C  | -2.36064400 | -1.00125600 | 1.76655300  |
| C  | -3.34309300 | 1.07571300  | 0.18343900  |
| H  | -1.74934300 | 2.26132600  | 0.95929400  |
| C  | -3.48809500 | -1.22161400 | 0.96711600  |
| H  | -2.02434100 | -1.79544300 | 2.42835800  |
| C  | -3.95861700 | -0.18130000 | 0.18752800  |
| H  | -3.72961500 | 1.87193600  | -0.44275400 |
| H  | -3.97084500 | -2.19097200 | 0.95653300  |
| Br | -5.49498300 | -0.48355700 | -0.97708800 |
| C  | -2.16486900 | -2.76272800 | -1.55973600 |

|   |             |             |             |
|---|-------------|-------------|-------------|
| C | -1.27660100 | -3.65123200 | -0.94358300 |
| C | 0.02656300  | -3.24891100 | -0.65480100 |
| C | 0.48132000  | -1.94764500 | -0.97110600 |
| C | -0.44938800 | -1.05929600 | -1.56402700 |
| C | -1.75415600 | -1.46598400 | -1.86323500 |
| H | -3.17738600 | -3.07841600 | -1.79611300 |
| H | -1.59743500 | -4.66237400 | -0.70693600 |
| H | 0.72825200  | -3.95394500 | -0.21912500 |
| H | -0.11068900 | -0.06537600 | -1.84080600 |
| H | -2.44475500 | -0.77375600 | -2.33427600 |
| C | 3.58013800  | -0.03377200 | -1.92518600 |
| C | 4.33085000  | -2.22507400 | -1.05369800 |
| C | 4.69414200  | -0.72790900 | -1.13538100 |
| H | 3.57986500  | -0.38859900 | -2.96730700 |
| H | 4.94597700  | -2.71599800 | -0.28926700 |
| B | 2.00783300  | -1.50854800 | -0.82258700 |
| O | 2.29707900  | -0.25771600 | -1.36019800 |
| O | 2.96405200  | -2.50265400 | -0.76049600 |
| H | 3.74749100  | 1.04970500  | -1.94270000 |
| H | 4.56184100  | -2.70391600 | -2.01552800 |
| C | 6.02321300  | -0.58906800 | -1.88983000 |
| H | 5.95792100  | -0.99836000 | -2.90518700 |
| H | 6.31735100  | 0.46417000  | -1.96627300 |
| H | 6.82625000  | -1.11862200 | -1.36336800 |
| C | 4.81307000  | -0.07966200 | 0.25260600  |
| H | 5.58237400  | -0.58060800 | 0.85164900  |
| H | 5.10048600  | 0.97395700  | 0.14903100  |
| H | 3.86789000  | -0.12507900 | 0.79585800  |
| O | 1.78543500  | -1.03654500 | 1.23244300  |
| C | 2.00021000  | -2.09409500 | 2.15474200  |
| C | 3.45914000  | -2.19993900 | 2.58670800  |
| H | 1.68456500  | -3.05766900 | 1.72303300  |
| H | 1.38517600  | -1.92975100 | 3.05334700  |
| H | 3.56410400  | -2.98324100 | 3.34786900  |

|   |            |             |            |
|---|------------|-------------|------------|
| H | 4.10165700 | -2.45548800 | 1.74215000 |
| H | 3.80706200 | -1.25311700 | 3.01325200 |

**im7**

SCF Energy (a.u.) = -1560.758545

Thermal correction to Gibbs free energy (a.u.) = 0.503081

Charge = 0, Multiplicity = 1

|    |             |             |             |
|----|-------------|-------------|-------------|
| Ni | 0.04770500  | 0.40335100  | -1.38663300 |
| C  | -0.29593400 | -3.04995200 | -1.15455300 |
| C  | 0.49763500  | -2.59707300 | -0.09262300 |
| C  | 0.42767800  | -3.21050700 | 1.15507200  |
| C  | -0.42672200 | -4.29860500 | 1.39628100  |
| C  | -1.19944000 | -4.76751800 | 0.31972200  |
| C  | -1.12923900 | -4.15548900 | -0.92746700 |
| H  | 1.17914900  | -1.76713500 | -0.22568800 |
| H  | 1.05684700  | -2.83336700 | 1.95773700  |
| H  | -1.85901900 | -5.61925000 | 0.45563200  |
| H  | -1.74235300 | -4.53560300 | -1.74214400 |
| C  | -0.46879400 | -4.89345200 | 2.73937500  |
| C  | -1.25131100 | -5.89502500 | 3.16012500  |
| H  | 0.22284800  | -4.44537100 | 3.45243100  |
| H  | -1.19603900 | -6.25509900 | 4.18258300  |
| H  | -1.97002200 | -6.39137400 | 2.51372300  |
| C  | -0.70793900 | -0.92175600 | -2.58843200 |
| C  | -0.27724900 | -2.37910400 | -2.51485400 |
| H  | 0.73538600  | -2.43076500 | -2.93369500 |
| H  | -0.90657100 | -2.96403900 | -3.20252500 |
| H  | -0.54873300 | -0.49579700 | -3.58351700 |
| C  | -1.81655700 | -0.34646400 | -1.85851200 |
| C  | -2.62525100 | -0.99820000 | -0.87613800 |
| C  | -1.90975400 | 1.07893300  | -1.95068800 |
| C  | -3.49125600 | -0.27979300 | -0.08465700 |
| H  | -2.56780200 | -2.07224300 | -0.76462500 |
| C  | -2.80972800 | 1.80585700  | -1.13677800 |

|    |             |             |             |
|----|-------------|-------------|-------------|
| H  | -1.45878100 | 1.59545700  | -2.79723000 |
| C  | -3.57061300 | 1.12110900  | -0.22278000 |
| H  | -4.11219300 | -0.78673100 | 0.64543900  |
| H  | -2.89270400 | 2.87924600  | -1.24659300 |
| Br | -4.81912700 | 2.09354000  | 0.91880700  |
| C  | -1.21103800 | 3.07327100  | 1.34920300  |
| C  | -0.40435500 | 3.64940600  | 0.36519500  |
| C  | 0.64283600  | 2.91267800  | -0.19022300 |
| C  | 0.93405700  | 1.59593200  | 0.23592300  |
| C  | 0.08009500  | 1.03533500  | 1.21602800  |
| C  | -0.97964300 | 1.75946100  | 1.76371400  |
| H  | -2.02976600 | 3.63987000  | 1.78341900  |
| H  | -0.58894600 | 4.67057300  | 0.04058000  |
| H  | 1.29502300  | 3.36252500  | -0.93484300 |
| H  | 0.29169600  | 0.03001800  | 1.57047200  |
| H  | -1.62148900 | 1.30865700  | 2.51555800  |
| C  | 3.49645000  | 0.51761300  | 1.82620400  |
| C  | 4.02832500  | 2.42724900  | 0.33515200  |
| C  | 4.64154700  | 1.42915700  | 1.33868900  |
| H  | 2.79827700  | 1.12157000  | 2.43470300  |
| H  | 4.81865500  | 3.03959900  | -0.11905300 |
| B  | 2.33440600  | 0.83313500  | -0.25089500 |
| O  | 2.81119500  | -0.09831200 | 0.75777400  |
| O  | 3.32627800  | 1.78085000  | -0.70535100 |
| H  | 3.89535500  | -0.27290500 | 2.47609900  |
| H  | 3.35545800  | 3.11245800  | 0.88219900  |
| C  | 5.23017800  | 2.19268700  | 2.52930500  |
| H  | 4.46493200  | 2.79031200  | 3.03994200  |
| H  | 5.66274600  | 1.50195200  | 3.26357300  |
| H  | 6.02725600  | 2.87288700  | 2.20482200  |
| C  | 5.72925300  | 0.59663300  | 0.64732800  |
| H  | 6.56285700  | 1.23513000  | 0.32910300  |
| H  | 6.12887600  | -0.16762700 | 1.32530800  |
| H  | 5.32906200  | 0.09619400  | -0.23697800 |

|   |            |             |             |
|---|------------|-------------|-------------|
| O | 1.87821000 | 0.01351500  | -1.43490300 |
| C | 2.77883900 | -0.41897400 | -2.45972800 |
| C | 3.50093700 | -1.69868200 | -2.05859600 |
| H | 3.49002300 | 0.39302000  | -2.63453800 |
| H | 2.18654000 | -0.56661700 | -3.36887000 |
| H | 4.22876100 | -1.97618300 | -2.83077100 |
| H | 4.02333000 | -1.55087400 | -1.11074300 |
| H | 2.79951900 | -2.52867900 | -1.92747000 |

#### TS4

SCF Energy (a.u.) = -1560.748334

Thermal correction to Gibbs free energy (a.u.) = 0.501300

Charge = 0, Multiplicity = 1

|    |             |             |             |
|----|-------------|-------------|-------------|
| Ni | 0.21248800  | 0.05127200  | -1.43433500 |
| C  | -1.18069100 | -3.15100900 | -1.04047000 |
| C  | -0.30483300 | -2.88207900 | 0.01870600  |
| C  | -0.58521000 | -3.33792700 | 1.30342100  |
| C  | -1.73832100 | -4.08978400 | 1.58348900  |
| C  | -2.59654500 | -4.38603300 | 0.51058200  |
| C  | -2.31827900 | -3.92610200 | -0.77260000 |
| H  | 0.59969100  | -2.31220500 | -0.15267400 |
| H  | 0.10763800  | -3.10178200 | 2.10748600  |
| H  | -3.49050800 | -4.97898800 | 0.67888800  |
| H  | -3.00617500 | -4.15813900 | -1.58293000 |
| C  | -1.98881300 | -4.53073100 | 2.96266600  |
| C  | -3.03854000 | -5.22716200 | 3.41630000  |
| H  | -1.21691500 | -4.24066500 | 3.67534400  |
| H  | -3.11819600 | -5.49812300 | 4.46435800  |
| H  | -3.85145900 | -5.55182600 | 2.77252500  |
| C  | -0.91126900 | -1.09011100 | -2.58948400 |
| C  | -0.93570600 | -2.60500700 | -2.43283400 |
| H  | 0.03199000  | -2.97713000 | -2.79846800 |
| H  | -1.68831700 | -3.03117000 | -3.11321300 |
| H  | -0.64201400 | -0.78932500 | -3.60667500 |

|    |             |             |             |
|----|-------------|-------------|-------------|
| C  | -1.77848600 | -0.15805900 | -1.90786700 |
| C  | -2.70454000 | -0.45234800 | -0.85360900 |
| C  | -1.44035100 | 1.22146000  | -2.10336500 |
| C  | -3.26620300 | 0.55163400  | -0.10056700 |
| H  | -2.97891200 | -1.47917300 | -0.65578600 |
| C  | -2.04310800 | 2.24961800  | -1.33540600 |
| H  | -0.88018000 | 1.51489900  | -2.99033000 |
| C  | -2.92625700 | 1.89920100  | -0.35002800 |
| H  | -3.97319400 | 0.31098400  | 0.68569000  |
| H  | -1.78357200 | 3.28437200  | -1.52022000 |
| Br | -3.75990300 | 3.28372900  | 0.74652400  |
| C  | 0.22005900  | 3.81102000  | 1.22050100  |
| C  | 0.95463700  | 3.86419000  | 0.03261100  |
| C  | 1.30184200  | 2.68013300  | -0.62164100 |
| C  | 0.93048000  | 1.41529000  | -0.12295700 |
| C  | 0.21410200  | 1.39867200  | 1.09234000  |
| C  | -0.14332800 | 2.57290000  | 1.75580400  |
| H  | -0.06159600 | 4.72858800  | 1.73012400  |
| H  | 1.25218700  | 4.82564500  | -0.37970700 |
| H  | 1.88457900  | 2.73465300  | -1.53931800 |
| H  | -0.06721700 | 0.43978000  | 1.52207800  |
| H  | -0.71022500 | 2.52771300  | 2.68196400  |
| C  | 3.01133200  | -0.00231300 | 2.01340000  |
| C  | 4.21378000  | 1.38032500  | 0.33847600  |
| C  | 4.39929400  | 0.52306300  | 1.60386500  |
| H  | 2.38601600  | 0.83396300  | 2.35918100  |
| H  | 5.18774100  | 1.68035600  | -0.06485000 |
| B  | 2.39579100  | -0.03894500 | -0.30330000 |
| O  | 2.35661600  | -0.67289200 | 0.94614900  |
| O  | 3.52801100  | 0.68327900  | -0.69332800 |
| H  | 3.10367200  | -0.71825400 | 2.83822600  |
| H  | 3.65404400  | 2.29365200  | 0.58823700  |
| C  | 4.96150900  | 1.40292200  | 2.72610700  |
| H  | 4.30101300  | 2.25230700  | 2.93726400  |

|   |            |             |             |
|---|------------|-------------|-------------|
| H | 5.07859400 | 0.82729600  | 3.65199100  |
| H | 5.94745900 | 1.79985500  | 2.45603000  |
| C | 5.34391200 | -0.65459700 | 1.32291700  |
| H | 6.31633000 | -0.29923400 | 0.96134300  |
| H | 5.51536000 | -1.23757700 | 2.23577400  |
| H | 4.92223000 | -1.32646800 | 0.57129200  |
| O | 1.85833300 | -0.90210200 | -1.35077300 |
| C | 2.60042100 | -1.13932500 | -2.56492400 |
| C | 3.74326400 | -2.10575300 | -2.30697800 |
| H | 2.96849200 | -0.18598400 | -2.95534500 |
| H | 1.88126100 | -1.55918400 | -3.27254200 |
| H | 4.24834900 | -2.34464900 | -3.25027500 |
| H | 4.47327400 | -1.65981600 | -1.62743900 |
| H | 3.36796600 | -3.03459000 | -1.86560500 |

**im8**

SCF Energy (a.u.) = -1560.759068

Thermal correction to Gibbs free energy (a.u.) = 0.499303

Charge = 0, Multiplicity = 1

|    |             |             |             |
|----|-------------|-------------|-------------|
| Ni | -0.12681200 | -0.36863100 | -1.46771400 |
| C  | 1.97289700  | 2.69196600  | -1.15523100 |
| C  | 1.08350900  | 2.62693600  | -0.07700400 |
| C  | 1.44110200  | 3.12830700  | 1.16999600  |
| C  | 2.69439600  | 3.72322800  | 1.39209400  |
| C  | 3.57697700  | 3.80373500  | 0.30138800  |
| C  | 3.21891600  | 3.29899700  | -0.94484600 |
| H  | 0.11367500  | 2.16604100  | -0.20309500 |
| H  | 0.73375100  | 3.05188700  | 1.99246000  |
| H  | 4.55409500  | 4.26025100  | 0.42748900  |
| H  | 3.92553000  | 3.36240900  | -1.76937000 |
| C  | 3.02094800  | 4.22682200  | 2.73332300  |
| C  | 4.15241600  | 4.82594900  | 3.12525400  |
| H  | 2.23346500  | 4.08158500  | 3.47286000  |
| H  | 4.28270500  | 5.15737600  | 4.15063200  |

|    |             |             |             |
|----|-------------|-------------|-------------|
| H  | 4.98471900  | 5.00896500  | 2.45118300  |
| C  | 1.30637200  | 0.62103700  | -2.56765200 |
| C  | 1.61891700  | 2.10750700  | -2.50600900 |
| H  | 0.73803200  | 2.63592900  | -2.90021000 |
| H  | 2.43333000  | 2.33996400  | -3.20886200 |
| H  | 0.97869000  | 0.31542200  | -3.56590300 |
| C  | 1.90004000  | -0.41758000 | -1.79765200 |
| C  | 2.78482000  | -0.26090200 | -0.66764600 |
| C  | 1.31052400  | -1.72613100 | -1.98091100 |
| C  | 3.07429300  | -1.31423700 | 0.15793800  |
| H  | 3.24865000  | 0.69848900  | -0.48520100 |
| C  | 1.65951900  | -2.81656200 | -1.12801400 |
| H  | 0.85469500  | -1.97439700 | -2.93929400 |
| C  | 2.49840400  | -2.59070700 | -0.07853500 |
| H  | 3.75267000  | -1.17953000 | 0.99341200  |
| H  | 1.23450600  | -3.79559900 | -1.31349100 |
| Br | 2.93659700  | -4.04502800 | 1.15526600  |
| C  | -2.83471300 | -3.46095900 | 0.96217100  |
| C  | -3.19460200 | -3.08668800 | -0.33353800 |
| C  | -2.39290600 | -2.19126800 | -1.05348200 |
| C  | -1.21508600 | -1.64286500 | -0.51470400 |
| C  | -0.87159600 | -2.05242000 | 0.78859700  |
| C  | -1.66420900 | -2.93954800 | 1.52230800  |
| H  | -3.45103600 | -4.15752400 | 1.52494500  |
| H  | -4.09772800 | -3.49143400 | -0.78615000 |
| H  | -2.71064800 | -1.90926500 | -2.05695100 |
| H  | 0.04126100  | -1.67237800 | 1.24357500  |
| H  | -1.36526000 | -3.23090300 | 2.52711200  |
| C  | -2.50967700 | 0.74258100  | 2.02014000  |
| C  | -4.46246400 | 0.25358300  | 0.57104100  |
| C  | -4.02130700 | 0.96345500  | 1.85957600  |
| H  | -2.29252400 | -0.31104800 | 2.22502900  |
| H  | -5.50449500 | 0.49301200  | 0.33686900  |
| B  | -2.36065100 | 0.90658000  | -0.36363900 |

|   |             |             |             |
|---|-------------|-------------|-------------|
| O | -1.77980500 | 1.11749000  | 0.84590400  |
| O | -3.67957700 | 0.64995400  | -0.56450400 |
| H | -2.11746100 | 1.34821700  | 2.84307100  |
| H | -4.36634800 | -0.83280800 | 0.67458200  |
| C | -4.74596800 | 0.32294400  | 3.04991900  |
| H | -4.53018100 | -0.74962300 | 3.11457900  |
| H | -4.43582200 | 0.79044100  | 3.99158100  |
| H | -5.83122400 | 0.44798700  | 2.95925200  |
| C | -4.33761500 | 2.46539100  | 1.77943400  |
| H | -5.41346700 | 2.62828200  | 1.64752600  |
| H | -4.02828700 | 2.97457500  | 2.69929600  |
| H | -3.81912400 | 2.94315700  | 0.94267300  |
| O | -1.52974400 | 1.08906700  | -1.48013100 |
| C | -2.13445400 | 1.32770700  | -2.77543800 |
| C | -2.73027600 | 2.72346600  | -2.83498200 |
| H | -2.88812800 | 0.55735200  | -2.95964000 |
| H | -1.32344900 | 1.21481100  | -3.49649700 |
| H | -3.12928900 | 2.91493700  | -3.83743000 |
| H | -3.54830700 | 2.82763000  | -2.11622400 |
| H | -1.96595600 | 3.47600100  | -2.61529500 |

### im9

SCF Energy (a.u.) = -1346.326601

Thermal correction to Gibbs free energy (a.u.) = 0.460056

Charge = 0, Multiplicity = 1

|    |             |             |             |
|----|-------------|-------------|-------------|
| Ni | 1.97836700  | -0.25644700 | 0.12929600  |
| C  | -1.79162600 | -2.15766300 | 0.94527700  |
| C  | -2.76142800 | -1.88469300 | 1.91312500  |
| C  | -4.07430100 | -2.32753500 | 1.76155800  |
| C  | -4.46777000 | -3.06407300 | 0.63468600  |
| C  | -3.48606900 | -3.34751500 | -0.33335200 |
| C  | -2.18022700 | -2.90338900 | -0.17931100 |
| H  | -2.48658900 | -1.32105000 | 2.80220200  |
| H  | -4.81092800 | -2.09846100 | 2.52820700  |

|    |             |             |             |
|----|-------------|-------------|-------------|
| H  | -3.74861900 | -3.92533600 | -1.21443800 |
| H  | -1.44095600 | -3.14003300 | -0.94064600 |
| C  | -5.86455200 | -3.50400900 | 0.51853600  |
| C  | -6.42061200 | -4.19367200 | -0.48557600 |
| H  | -6.49798500 | -3.22114100 | 1.35944500  |
| H  | -7.47145300 | -4.46470600 | -0.46200800 |
| H  | -5.86122300 | -4.51107300 | -1.36121900 |
| C  | 0.07532400  | -0.73949700 | -0.06122800 |
| C  | -0.36359300 | -1.66743200 | 1.08013400  |
| H  | -0.24114300 | -1.18670300 | 2.05924200  |
| H  | 0.31115000  | -2.53113100 | 1.07864300  |
| H  | 0.00217900  | -1.29020300 | -1.00053700 |
| C  | -0.66214900 | 0.54486800  | -0.22013500 |
| C  | -1.40232400 | 1.15714500  | 0.80518900  |
| C  | -0.56683900 | 1.23580900  | -1.44529800 |
| C  | -1.97935900 | 2.41865800  | 0.64170300  |
| H  | -1.53903900 | 0.64745600  | 1.75161100  |
| C  | -1.13167700 | 2.49333800  | -1.63085600 |
| H  | -0.01685500 | 0.77503700  | -2.26256500 |
| C  | -1.82486100 | 3.07650800  | -0.57163200 |
| H  | -2.54257000 | 2.87434900  | 1.44856500  |
| H  | -1.03760700 | 3.00933000  | -2.57998100 |
| Br | -2.61085800 | 4.85686900  | -0.80715600 |
| C  | 3.02464000  | -4.19972900 | -2.22331800 |
| C  | 3.02633400  | -4.18397900 | -0.82802600 |
| C  | 2.68440600  | -3.01690300 | -0.13649200 |
| C  | 2.33164600  | -1.84116900 | -0.81876000 |
| C  | 2.32459200  | -1.88070800 | -2.22286300 |
| C  | 2.67370900  | -3.04105000 | -2.91940200 |
| H  | 3.28949600  | -5.10503900 | -2.76264400 |
| H  | 3.29262800  | -5.08103700 | -0.27345500 |
| H  | 2.69381000  | -3.03197800 | 0.95236100  |
| H  | 2.03573200  | -0.99507400 | -2.78732900 |
| H  | 2.66372700  | -3.04168600 | -4.00712400 |

|   |            |             |             |
|---|------------|-------------|-------------|
| C | 1.79052100 | 1.09559100  | 2.02554500  |
| C | 1.85456600 | 2.03846900  | 1.04961500  |
| C | 3.07621800 | 2.79383300  | 0.57879700  |
| C | 3.81017500 | 2.08145200  | -0.57822900 |
| C | 4.05054100 | 0.60437000  | -0.37799200 |
| C | 4.24342400 | -0.07573800 | 0.78732700  |
| C | 4.29808000 | 0.49008100  | 2.18994000  |
| C | 2.91261500 | 0.54488800  | 2.87528800  |
| H | 0.79553500 | 0.76840400  | 2.31681700  |
| H | 0.91446900 | 2.35110300  | 0.60818500  |
| H | 3.76129200 | 2.97788000  | 1.40882000  |
| H | 2.75607600 | 3.77912700  | 0.22316600  |
| H | 3.21593500 | 2.19706900  | -1.49310200 |
| H | 4.76612700 | 2.58979000  | -0.77503100 |
| H | 4.18251600 | 0.03677800  | -1.29653400 |
| H | 4.47181800 | -1.13465400 | 0.69520800  |
| H | 4.76024300 | 1.47932100  | 2.18810400  |
| H | 4.95067100 | -0.14787800 | 2.79585400  |
| H | 2.62938900 | -0.47075600 | 3.17773900  |
| H | 2.99151800 | 1.12486400  | 3.80713400  |

## TS5

SCF Energy (a.u.) = -1346.290628

Thermal correction to Gibbs free energy (a.u.) = 0.459060

Charge = 0, Multiplicity = 1

|    |             |             |             |
|----|-------------|-------------|-------------|
| Ni | 2.17858200  | -0.78879800 | -0.27610400 |
| C  | -0.98642700 | -2.16685700 | -0.89620300 |
| C  | -1.53982800 | -2.14987000 | 0.38713200  |
| C  | -2.89421400 | -2.40414700 | 0.57879100  |
| C  | -3.74460800 | -2.69036800 | -0.50131700 |
| C  | -3.17776200 | -2.71936900 | -1.78809500 |
| C  | -1.82642300 | -2.46196800 | -1.97908900 |
| H  | -0.90928000 | -1.91329500 | 1.23784800  |
| H  | -3.30672800 | -2.37782200 | 1.58431800  |

|    |             |             |             |
|----|-------------|-------------|-------------|
| H  | -3.80160600 | -2.94012600 | -2.64869400 |
| H  | -1.41293100 | -2.47988000 | -2.98499400 |
| C  | -5.16842000 | -2.94344300 | -0.24263000 |
| C  | -6.11223400 | -3.26409600 | -1.13650400 |
| H  | -5.46025700 | -2.85227000 | 0.80336400  |
| H  | -7.14028000 | -3.42593100 | -0.82844800 |
| H  | -5.90451000 | -3.37746000 | -2.19694000 |
| C  | 0.62181100  | -0.24866500 | -1.44105500 |
| C  | 0.45104800  | -1.79459200 | -1.14364800 |
| H  | 1.02999100  | -2.16799200 | -0.24611500 |
| H  | 0.84632200  | -2.34752100 | -2.00034200 |
| H  | 0.53570200  | -0.16799100 | -2.52166700 |
| C  | -0.42146500 | 0.62674800  | -0.81179500 |
| C  | -0.41320400 | 0.92532200  | 0.55514700  |
| C  | -1.46854400 | 1.12584200  | -1.59404700 |
| C  | -1.42575300 | 1.68435300  | 1.13820800  |
| H  | 0.39705500  | 0.55282800  | 1.17143300  |
| C  | -2.49660200 | 1.88373100  | -1.03278600 |
| H  | -1.49599700 | 0.90458400  | -2.65744100 |
| C  | -2.45964200 | 2.14727600  | 0.33146900  |
| H  | -1.40890100 | 1.90653300  | 2.19944800  |
| H  | -3.30942400 | 2.25458000  | -1.64650400 |
| Br | -3.90149200 | 3.19838300  | 1.13983300  |
| C  | 3.86159100  | 2.67062600  | -2.79131100 |
| C  | 3.84399200  | 1.36208100  | -3.28805200 |
| C  | 3.05424100  | 0.38967300  | -2.68200300 |
| C  | 2.28578300  | 0.68914500  | -1.53564200 |
| C  | 2.27537100  | 2.01698000  | -1.07691900 |
| C  | 3.06774600  | 2.99018100  | -1.68996000 |
| H  | 4.47277200  | 3.43090000  | -3.26877400 |
| H  | 4.44538300  | 1.10093100  | -4.15543800 |
| H  | 3.04335300  | -0.62007600 | -3.08703600 |
| H  | 1.65612000  | 2.29043800  | -0.22952700 |
| H  | 3.05929500  | 4.00561300  | -1.30132600 |

|   |            |             |             |
|---|------------|-------------|-------------|
| C | 1.34236100 | -1.08409600 | 2.92725300  |
| C | 1.99919900 | 0.06599400  | 3.12291600  |
| C | 3.48388700 | 0.31165000  | 3.07424900  |
| C | 4.03211600 | 0.63707500  | 1.67087300  |
| C | 3.94131200 | -0.43365600 | 0.60157600  |
| C | 3.59428600 | -1.78993600 | 0.71987400  |
| C | 3.27764000 | -2.58463400 | 1.98765400  |
| C | 1.87072600 | -2.45606400 | 2.60082200  |
| H | 0.25633000 | -1.04455100 | 3.02227800  |
| H | 1.39276700 | 0.94862900  | 3.32917100  |
| H | 4.03328100 | -0.53312900 | 3.49548800  |
| H | 3.71083300 | 1.16843000  | 3.72039400  |
| H | 3.55046500 | 1.54853800  | 1.29252700  |
| H | 5.09554500 | 0.89699900  | 1.78535400  |
| H | 4.55157600 | -0.17974100 | -0.26467000 |
| H | 3.98886900 | -2.42313500 | -0.07900900 |
| H | 4.03169900 | -2.37515800 | 2.75363700  |
| H | 3.40616700 | -3.64586600 | 1.74303000  |
| H | 1.15447200 | -2.92870000 | 1.91427100  |
| H | 1.83593000 | -3.07491900 | 3.51167100  |

### im10

SCF Energy (a.u.) = -1346.344997

Thermal correction to Gibbs free energy (a.u.) = 0.460069

Charge = 0, Multiplicity = 1

|    |             |            |             |
|----|-------------|------------|-------------|
| Ni | 2.70887800  | 0.19249300 | -0.00983100 |
| C  | -1.35935700 | 2.23198700 | 0.16516100  |
| C  | -2.05655000 | 1.78004800 | -0.95931000 |
| C  | -3.36531500 | 2.18814900 | -1.19918500 |
| C  | -4.02787600 | 3.06487400 | -0.32500800 |
| C  | -3.32003500 | 3.52465500 | 0.79987900  |
| C  | -2.01268300 | 3.11629600 | 1.03540000  |
| H  | -1.57648400 | 1.08077800 | -1.63846500 |
| H  | -3.89059700 | 1.81781000 | -2.07611100 |

|    |             |             |             |
|----|-------------|-------------|-------------|
| H  | -3.79678800 | 4.20748800  | 1.49652800  |
| H  | -1.48706300 | 3.48274700  | 1.91476400  |
| C  | -5.41283200 | 3.45731600  | -0.62063500 |
| C  | -6.18925800 | 4.29203100  | 0.08151700  |
| H  | -5.82893400 | 3.00097500  | -1.51863000 |
| H  | -7.20531200 | 4.50721100  | -0.23382600 |
| H  | -5.85089800 | 4.78977700  | 0.98614000  |
| C  | 0.01540100  | 0.52544800  | 1.48619000  |
| C  | 0.02148200  | 1.72019800  | 0.48141800  |
| H  | 0.52599000  | 1.38781000  | -0.43416200 |
| H  | 0.62342800  | 2.53167900  | 0.90342000  |
| H  | -0.37381300 | 0.92507400  | 2.43478500  |
| C  | -0.97594400 | -0.52739500 | 1.01998800  |
| C  | -0.64494600 | -1.48537100 | 0.05424500  |
| C  | -2.29456600 | -0.48770100 | 1.48560200  |
| C  | -1.60063500 | -2.36692100 | -0.45173400 |
| H  | 0.37752600  | -1.55178800 | -0.29669700 |
| C  | -3.26940300 | -1.35574700 | 0.99349300  |
| H  | -2.57772400 | 0.25577500  | 2.22488300  |
| C  | -2.90456300 | -2.28119400 | 0.02341700  |
| H  | -1.33077600 | -3.10403900 | -1.19959700 |
| H  | -4.28987100 | -1.30329100 | 1.35488300  |
| Br | -4.26239200 | -3.50029200 | -0.69201400 |
| C  | 3.85394600  | -0.87632700 | 2.99335500  |
| C  | 3.74229100  | 0.41615100  | 2.52445500  |
| C  | 2.54388700  | 0.87841600  | 1.89981300  |
| C  | 1.42091800  | -0.01313000 | 1.77364700  |
| C  | 1.56050700  | -1.32087900 | 2.33617300  |
| C  | 2.73868100  | -1.74549000 | 2.91068100  |
| H  | 4.77502500  | -1.21300800 | 3.46025800  |
| H  | 4.56789400  | 1.11309800  | 2.64139500  |
| H  | 2.41788600  | 1.95269100  | 1.77738900  |
| H  | 0.70504200  | -1.98750700 | 2.31705900  |
| H  | 2.80671800  | -2.75002200 | 3.31905800  |

|   |            |             |             |
|---|------------|-------------|-------------|
| C | 2.20613900 | -0.26523600 | -1.92075900 |
| C | 3.06192500 | -1.24688000 | -1.40724900 |
| C | 4.54149000 | -1.40624100 | -1.73785100 |
| C | 5.50392300 | -0.56979400 | -0.85612100 |
| C | 5.09801700 | 0.86127200  | -0.58716700 |
| C | 4.43249800 | 1.71193400  | -1.39781200 |
| C | 3.97242000 | 1.42919100  | -2.80522600 |
| C | 2.53760400 | 0.85671800  | -2.88486800 |
| H | 1.13857300 | -0.48697300 | -1.89591200 |
| H | 2.58857300 | -2.13928000 | -0.99626900 |
| H | 4.71463100 | -1.18548600 | -2.79551900 |
| H | 4.81559400 | -2.45931000 | -1.60743800 |
| H | 5.58726800 | -1.06284900 | 0.12025200  |
| H | 6.51176000 | -0.60066100 | -1.29829600 |
| H | 5.41413800 | 1.24785100  | 0.37894700  |
| H | 4.22527600 | 2.71071100  | -1.01461200 |
| H | 4.67210000 | 0.75022800  | -3.29754300 |
| H | 3.99826100 | 2.36109600  | -3.38239700 |
| H | 1.82608200 | 1.67309900  | -2.69746000 |
| H | 2.34865200 | 0.53046500  | -3.92012500 |

## P1

SCF Energy (a.u.) = -863.257443

Thermal correction to Gibbs free energy (a.u.) = 0.289566

Charge = 0, Multiplicity = 1

|   |            |             |             |
|---|------------|-------------|-------------|
| C | 2.46909100 | -1.04643000 | 0.64814600  |
| C | 3.06249900 | -1.95368200 | -0.24142600 |
| C | 4.42617800 | -1.91676300 | -0.50570900 |
| C | 5.25517300 | -0.96483500 | 0.11420200  |
| C | 4.65625700 | -0.06005600 | 1.00515900  |
| C | 3.28954600 | -0.09850600 | 1.26705000  |
| H | 2.44189600 | -2.70016100 | -0.73264000 |
| H | 4.85233300 | -2.63625000 | -1.19816100 |
| H | 5.27504800 | 0.68738900  | 1.49563500  |

|    |             |             |             |
|----|-------------|-------------|-------------|
| H  | 2.84936500  | 0.62676500  | 1.94551800  |
| C  | 6.70216600  | -0.87808700 | -0.12738600 |
| C  | 7.44087900  | -1.65399600 | -0.93039300 |
| H  | 7.20433700  | -0.08233000 | 0.42263100  |
| H  | 8.50980100  | -1.49481300 | -1.03141000 |
| H  | 7.01907800  | -2.46917000 | -1.51184100 |
| C  | 0.23053600  | -0.23104500 | -0.21963300 |
| C  | 0.97714500  | -1.05224500 | 0.86596900  |
| H  | 0.59986100  | -2.08188200 | 0.84722300  |
| H  | 0.74505100  | -0.63645100 | 1.85299900  |
| H  | 0.54104200  | -0.64191300 | -1.18912700 |
| C  | -1.28511900 | -0.35027600 | -0.14624000 |
| C  | -1.96278600 | -0.88576700 | 0.95236500  |
| C  | -2.04492300 | 0.12414800  | -1.22554300 |
| C  | -3.35963800 | -0.95312200 | 0.98172300  |
| H  | -1.41110200 | -1.26268600 | 1.80659200  |
| C  | -3.43564100 | 0.06520100  | -1.22048100 |
| H  | -1.53533800 | 0.55803500  | -2.08196800 |
| C  | -4.07445400 | -0.47635800 | -0.10775400 |
| H  | -3.87269300 | -1.37113200 | 1.84032800  |
| H  | -4.00961000 | 0.43376300  | -2.06300000 |
| Br | -6.03052000 | -0.56606500 | -0.08211200 |
| C  | 1.61318800  | 3.86827500  | -0.02789600 |
| C  | 2.12974700  | 2.99644800  | -0.98662200 |
| C  | 1.66351000  | 1.68335900  | -1.06124900 |
| C  | 0.67681900  | 1.22389200  | -0.18345200 |
| C  | 0.16109700  | 2.10710700  | 0.77292000  |
| C  | 0.62628100  | 3.41902600  | 0.85270400  |
| H  | 1.97389500  | 4.89123100  | 0.03202100  |
| H  | 2.89872900  | 3.33524900  | -1.67524000 |
| H  | 2.08308100  | 1.00013600  | -1.79474900 |
| H  | -0.61629900 | 1.76598800  | 1.45130700  |
| H  | 0.21442800  | 4.09277700  | 1.59907700  |

**im5c**

SCF Energy (a.u.) = -1419.695707

Thermal correction to Gibbs free energy (a.u.) = 0.433666

Charge = 0, Multiplicity = 1

|    |             |             |             |
|----|-------------|-------------|-------------|
| Ni | -0.80531700 | -0.48161300 | 0.14411400  |
| C  | -1.98012100 | -2.25721500 | 0.89751400  |
| C  | -2.85085800 | -1.21904300 | 1.30892600  |
| C  | -4.05099500 | -0.99296300 | 0.63032900  |
| C  | -4.41725300 | -1.76851700 | -0.47339400 |
| C  | -3.54748400 | -2.80369300 | -0.88183800 |
| C  | -2.35946100 | -3.03896000 | -0.21849800 |
| H  | -2.61890700 | -0.62813500 | 2.19013600  |
| H  | -4.69566600 | -0.18357400 | 0.95729400  |
| H  | -3.80818600 | -3.41853700 | -1.73642200 |
| H  | -1.70191600 | -3.83873800 | -0.54857000 |
| C  | -5.67591400 | -1.46848700 | -1.16527200 |
| C  | -6.10779300 | -2.00539300 | -2.31306000 |
| H  | -6.29371400 | -0.71468900 | -0.67902700 |
| H  | -7.05641300 | -1.70520900 | -2.74653200 |
| H  | -5.53563800 | -2.74215400 | -2.86910300 |
| Br | -1.80238800 | 0.15034000  | -2.00026700 |
| C  | 0.10861600  | -1.26577700 | 1.66779600  |
| C  | -0.71865600 | -2.55091800 | 1.70385600  |
| H  | -0.97322800 | -2.85005100 | 2.72944800  |
| H  | -0.18588900 | -3.39105500 | 1.24994300  |
| H  | -0.07375100 | -0.62842600 | 2.53497400  |
| C  | 1.53933700  | -1.32137300 | 1.31893000  |
| C  | 2.04080700  | -2.18021000 | 0.32083700  |
| C  | 2.44235300  | -0.41463700 | 1.90742000  |
| C  | 3.37257000  | -2.12730200 | -0.08736300 |
| H  | 1.37475800  | -2.88376000 | -0.16985100 |
| C  | 3.77637800  | -0.34670700 | 1.51456500  |
| H  | 2.08320000  | 0.26056200  | 2.67886900  |
| C  | 4.22329500  | -1.20309900 | 0.51135600  |

|    |             |             |             |
|----|-------------|-------------|-------------|
| H  | 3.73556500  | -2.78694700 | -0.86744000 |
| H  | 4.45343600  | 0.36241900  | 1.97761700  |
| Br | 6.08469600  | -1.09020500 | -0.08029900 |
| C  | -3.44412100 | 2.16389900  | 3.16364300  |
| C  | -3.79106300 | 2.48567200  | 1.84871600  |
| C  | -2.81110600 | 2.53126800  | 0.85739500  |
| C  | -1.47003400 | 2.24276000  | 1.15727100  |
| C  | -1.13719300 | 1.93369400  | 2.48672400  |
| C  | -2.11077800 | 1.89666100  | 3.48523300  |
| H  | -4.20766700 | 2.12935700  | 3.93611900  |
| H  | -4.82622300 | 2.70107600  | 1.59730900  |
| H  | -3.08581900 | 2.75793800  | -0.16788500 |
| H  | -0.10314600 | 1.71514100  | 2.73999800  |
| H  | -1.83325300 | 1.66124800  | 4.50931100  |
| C  | 0.74659900  | 3.24094500  | -1.84452700 |
| C  | 1.47799100  | 1.02619700  | -1.05196200 |
| C  | 1.97765600  | 2.41377400  | -1.45195300 |
| H  | 0.26106100  | 2.80898100  | -2.72685800 |
| H  | 2.28117400  | 0.41567600  | -0.64414800 |
| B  | -0.38817000 | 2.23070300  | 0.03062100  |
| O  | -0.22152500 | 3.28991300  | -0.78879400 |
| O  | 0.46082000  | 1.11110300  | -0.01324700 |
| H  | 1.02477000  | 4.27617300  | -2.06459400 |
| H  | 1.01901900  | 0.51645000  | -1.90249800 |
| C  | 2.89867400  | 2.25759000  | -2.66924800 |
| H  | 2.37457100  | 1.78931700  | -3.51006300 |
| H  | 3.27022600  | 3.23406000  | -3.00008400 |
| H  | 3.76678500  | 1.63664100  | -2.42011800 |
| C  | 2.74033200  | 3.07263000  | -0.29098100 |
| H  | 3.59428100  | 2.45257000  | 0.00289100  |
| H  | 3.11725500  | 4.05765100  | -0.58812800 |
| H  | 2.10721900  | 3.21005700  | 0.59071200  |

TS3<sub>c</sub>

SCF Energy (a.u.) = -1419.629569

Thermal correction to Gibbs free energy (a.u.) = 0.431952

Charge = 0, Multiplicity = 1

|    |             |             |             |
|----|-------------|-------------|-------------|
| Ni | -1.27782800 | -0.59058100 | 0.51377300  |
| C  | -2.44142200 | -2.48167100 | -0.36706900 |
| C  | -3.22721000 | -2.28836400 | 0.78790800  |
| C  | -4.50878000 | -1.74210300 | 0.69416700  |
| C  | -5.04419600 | -1.35429600 | -0.54155700 |
| C  | -4.26146100 | -1.55836000 | -1.69517400 |
| C  | -2.98929900 | -2.10191700 | -1.60772600 |
| H  | -2.84758500 | -2.60555200 | 1.75528000  |
| H  | -5.09696000 | -1.60043400 | 1.59679900  |
| H  | -4.65126900 | -1.27631900 | -2.66759500 |
| H  | -2.39587600 | -2.23583000 | -2.50826200 |
| C  | -6.38126000 | -0.74603900 | -0.58015700 |
| C  | -6.97572300 | -0.17881900 | -1.63722000 |
| H  | -6.91480200 | -0.75922800 | 0.36957300  |
| H  | -7.96992300 | 0.24846500  | -1.55491300 |
| H  | -6.50022200 | -0.10896600 | -2.61138100 |
| Br | -2.68314600 | 1.34118500  | -0.29821900 |
| C  | -0.18468900 | -2.17487100 | 0.68888900  |
| C  | -1.03681100 | -3.05666800 | -0.25288300 |
| H  | -1.07756800 | -4.09209300 | 0.11532300  |
| H  | -0.58851400 | -3.09268800 | -1.24953100 |
| H  | -0.28071900 | -2.50681200 | 1.72807300  |
| C  | 1.24599500  | -2.05360000 | 0.31459200  |
| C  | 1.63211900  | -1.60646000 | -0.96135800 |
| C  | 2.26010600  | -2.31336900 | 1.24951100  |
| C  | 2.96996800  | -1.39584000 | -1.28554800 |
| H  | 0.87033000  | -1.35951900 | -1.69290700 |
| C  | 3.60671500  | -2.10961300 | 0.94751700  |
| H  | 1.98772400  | -2.65275300 | 2.24509800  |
| C  | 3.94059500  | -1.64339600 | -0.31866800 |
| H  | 3.24966100  | -1.02799000 | -2.26631400 |

|    |             |             |             |
|----|-------------|-------------|-------------|
| H  | 4.37552900  | -2.30222600 | 1.68727400  |
| Br | 5.82240700  | -1.30890300 | -0.75305600 |
| C  | 1.02363900  | 1.62127000  | 3.96086800  |
| C  | -0.37113700 | 1.56385600  | 3.87780400  |
| C  | -0.98218600 | 1.05074100  | 2.73525300  |
| C  | -0.22222100 | 0.56168500  | 1.64688300  |
| C  | 1.17752200  | 0.64189100  | 1.75457400  |
| C  | 1.79581100  | 1.16712700  | 2.89163200  |
| H  | 1.50173900  | 2.02600600  | 4.84892700  |
| H  | -0.98107300 | 1.92479100  | 4.70208400  |
| H  | -2.06760700 | 1.04497100  | 2.67809500  |
| H  | 1.79424500  | 0.29870600  | 0.93555500  |
| H  | 2.88093800  | 1.21889300  | 2.93732600  |
| C  | 0.97567100  | 3.47009600  | 0.06054900  |
| C  | 0.75313400  | 2.13187200  | -2.07107200 |
| C  | 1.66485300  | 3.09725400  | -1.29068100 |
| H  | 0.93202000  | 4.55466300  | 0.18695500  |
| H  | 1.33234700  | 1.58338500  | -2.81922200 |
| B  | -0.60328600 | 1.72457100  | -0.21867400 |
| O  | -0.37961100 | 3.01027500  | 0.17227900  |
| O  | 0.14243800  | 1.14896000  | -1.22025300 |
| H  | 1.53831300  | 3.04985100  | 0.89963700  |
| H  | -0.03803500 | 2.68900100  | -2.58919600 |
| C  | 1.87430500  | 4.35685300  | -2.14596800 |
| H  | 0.92820400  | 4.88755000  | -2.30415300 |
| H  | 2.57265600  | 5.04562400  | -1.65692600 |
| H  | 2.29169800  | 4.10420700  | -3.12829700 |
| C  | 3.01854700  | 2.42442500  | -1.00961500 |
| H  | 3.56805300  | 2.25175600  | -1.94256500 |
| H  | 3.64450700  | 3.05347500  | -0.36587700 |
| H  | 2.88550300  | 1.45862400  | -0.51542000 |

**TS3<sub>A</sub>**

SCF Energy (a.u.) = -815.946558

Thermal correction to Gibbs free energy (a.u.) = 0.193747

Charge = 0, Multiplicity = 1

|    |             |             |             |
|----|-------------|-------------|-------------|
| Ni | -0.75990900 | 2.15529400  | 0.49771300  |
| C  | -2.37463200 | -0.33468100 | 0.91889600  |
| C  | -3.03926000 | -0.14398800 | -0.29574900 |
| C  | -3.60700000 | -1.22693200 | -0.96361300 |
| C  | -3.53493900 | -2.52900000 | -0.44458900 |
| C  | -2.86972700 | -2.70825200 | 0.78211100  |
| C  | -2.30123600 | -1.63259500 | 1.45047700  |
| H  | -3.08912500 | 0.84816100  | -0.73388500 |
| H  | -4.11133200 | -1.06088600 | -1.91179500 |
| H  | -2.79065600 | -3.69980700 | 1.21610200  |
| H  | -1.78128900 | -1.79566200 | 2.39036200  |
| C  | -4.14494600 | -3.63363600 | -1.19816400 |
| C  | -4.17110400 | -4.92752800 | -0.85656100 |
| H  | -4.62011900 | -3.33605100 | -2.13220800 |
| H  | -4.65326300 | -5.66223300 | -1.49334300 |
| H  | -3.72122400 | -5.30541600 | 0.05731500  |
| Br | -0.49840200 | 3.60686100  | -1.21251200 |
| C  | -0.35458200 | 0.89439100  | 1.96134000  |
| C  | -1.74611500 | 0.78233600  | 1.69609200  |
| H  | -2.16069500 | 2.16037100  | 0.88086200  |
| H  | -2.37412300 | 1.17603100  | 2.49666900  |
| H  | -0.08527200 | 1.45173100  | 2.85864000  |
| C  | 0.76336600  | 0.18785200  | 1.32952200  |
| C  | 0.65658100  | -0.55653700 | 0.13272700  |
| C  | 2.04275700  | 0.33692400  | 1.90636000  |
| C  | 1.78028300  | -1.13375100 | -0.45109200 |
| H  | -0.30389700 | -0.68564200 | -0.34794800 |
| C  | 3.16951900  | -0.24164500 | 1.33554800  |
| H  | 2.14839900  | 0.91675700  | 2.81911300  |
| C  | 3.02109500  | -0.97461900 | 0.15955200  |
| H  | 1.68678300  | -1.69754500 | -1.37180100 |
| H  | 4.14475100  | -0.12119800 | 1.79259400  |

Br 4.59120600 -1.79220000 -0.65130900

**im5<sub>A</sub>**

SCF Energy (a.u.) = -815.957048

Thermal correction to Gibbs free energy (a.u.) = 0.194504

Charge = 0, Multiplicity = 1

|    |             |             |             |
|----|-------------|-------------|-------------|
| Ni | -0.88060600 | 2.01373800  | 0.50673400  |
| C  | -2.27868600 | -0.42128100 | 1.10262100  |
| C  | -3.42331500 | -0.14933600 | 0.33726400  |
| C  | -4.06455800 | -1.16612600 | -0.36139000 |
| C  | -3.60345000 | -2.49236500 | -0.30873900 |
| C  | -2.47074800 | -2.76241000 | 0.48249500  |
| C  | -1.82029300 | -1.74937000 | 1.17138400  |
| H  | -3.79315400 | 0.87020200  | 0.27413600  |
| H  | -4.93934000 | -0.93229900 | -0.96206800 |
| H  | -2.09679400 | -3.77799800 | 0.56304100  |
| H  | -0.95093100 | -1.98291800 | 1.77738900  |
| C  | -4.31849000 | -3.52674600 | -1.06727200 |
| C  | -4.01752000 | -4.82953300 | -1.13775000 |
| H  | -5.18163300 | -3.16488900 | -1.62463100 |
| H  | -4.61846600 | -5.50855600 | -1.73399200 |
| H  | -3.17296500 | -5.26886000 | -0.61435100 |
| Br | -0.84228800 | 3.21231900  | -1.40769200 |
| C  | -0.25330000 | 0.87563800  | 2.07116200  |
| C  | -1.62125300 | 0.66893100  | 1.85934700  |
| H  | -1.39611600 | 3.11366700  | 1.25030600  |
| H  | -2.28431900 | 1.23625800  | 2.50952200  |
| H  | 0.01313000  | 1.52400400  | 2.90313200  |
| C  | 0.89694900  | 0.23200900  | 1.41164700  |
| C  | 0.82086200  | -0.37401800 | 0.13939100  |
| C  | 2.16159800  | 0.34029600  | 2.01905900  |
| C  | 1.96219000  | -0.86023600 | -0.49353000 |
| H  | -0.13137400 | -0.47953500 | -0.36818500 |
| C  | 3.30564800  | -0.16138400 | 1.40782200  |

|    |            |             |             |
|----|------------|-------------|-------------|
| H  | 2.24609800 | 0.82503500  | 2.98764900  |
| C  | 3.18931700 | -0.75757200 | 0.15399400  |
| H  | 1.89035500 | -1.31247300 | -1.47561900 |
| H  | 4.27125100 | -0.08102600 | 1.89343000  |
| Br | 4.78547500 | -1.45929800 | -0.71497400 |

**im9<sub>A</sub>**

SCF Energy (a.u.) = -1346.326601

Thermal correction to Gibbs free energy (a.u.) = 0.460056

Charge = 0, Multiplicity = 1

|    |             |             |             |
|----|-------------|-------------|-------------|
| Ni | 1.97836700  | -0.25644700 | 0.12929600  |
| C  | -1.79162600 | -2.15766300 | 0.94527700  |
| C  | -2.76142800 | -1.88469300 | 1.91312500  |
| C  | -4.07430100 | -2.32753500 | 1.76155800  |
| C  | -4.46777000 | -3.06407300 | 0.63468600  |
| C  | -3.48606900 | -3.34751500 | -0.33335200 |
| C  | -2.18022700 | -2.90338900 | -0.17931100 |
| H  | -2.48658900 | -1.32105000 | 2.80220200  |
| H  | -4.81092800 | -2.09846100 | 2.52820700  |
| H  | -3.74861900 | -3.92533600 | -1.21443800 |
| H  | -1.44095600 | -3.14003300 | -0.94064600 |
| C  | -5.86455200 | -3.50400900 | 0.51853600  |
| C  | -6.42061200 | -4.19367200 | -0.48557600 |
| H  | -6.49798500 | -3.22114100 | 1.35944500  |
| H  | -7.47145300 | -4.46470600 | -0.46200800 |
| H  | -5.86122300 | -4.51107300 | -1.36121900 |
| C  | 0.07532400  | -0.73949700 | -0.06122800 |
| C  | -0.36359300 | -1.66743200 | 1.08013400  |
| H  | -0.24114300 | -1.18670300 | 2.05924200  |
| H  | 0.31115000  | -2.53113100 | 1.07864300  |
| H  | 0.00217900  | -1.29020300 | -1.00053700 |
| C  | -0.66214900 | 0.54486800  | -0.22013500 |
| C  | -1.40232400 | 1.15714500  | 0.80518900  |
| C  | -0.56683900 | 1.23580900  | -1.44529800 |

|    |             |             |             |
|----|-------------|-------------|-------------|
| C  | -1.97935900 | 2.41865800  | 0.64170300  |
| H  | -1.53903900 | 0.64745600  | 1.75161100  |
| C  | -1.13167700 | 2.49333800  | -1.63085600 |
| H  | -0.01685500 | 0.77503700  | -2.26256500 |
| C  | -1.82486100 | 3.07650800  | -0.57163200 |
| H  | -2.54257000 | 2.87434900  | 1.44856500  |
| H  | -1.03760700 | 3.00933000  | -2.57998100 |
| Br | -2.61085800 | 4.85686900  | -0.80715600 |
| C  | 3.02464000  | -4.19972900 | -2.22331800 |
| C  | 3.02633400  | -4.18397900 | -0.82802600 |
| C  | 2.68440600  | -3.01690300 | -0.13649200 |
| C  | 2.33164600  | -1.84116900 | -0.81876000 |
| C  | 2.32459200  | -1.88070800 | -2.22286300 |
| C  | 2.67370900  | -3.04105000 | -2.91940200 |
| H  | 3.28949600  | -5.10503900 | -2.76264400 |
| H  | 3.29262800  | -5.08103700 | -0.27345500 |
| H  | 2.69381000  | -3.03197800 | 0.95236100  |
| H  | 2.03573200  | -0.99507400 | -2.78732900 |
| H  | 2.66372700  | -3.04168600 | -4.00712400 |
| C  | 1.79052100  | 1.09559100  | 2.02554500  |
| C  | 1.85456600  | 2.03846900  | 1.04961500  |
| C  | 3.07621800  | 2.79383300  | 0.57879700  |
| C  | 3.81017500  | 2.08145200  | -0.57822900 |
| C  | 4.05054100  | 0.60437000  | -0.37799200 |
| C  | 4.24342400  | -0.07573800 | 0.78732700  |
| C  | 4.29808000  | 0.49008100  | 2.18994000  |
| C  | 2.91261500  | 0.54488800  | 2.87528800  |
| H  | 0.79553500  | 0.76840400  | 2.31681700  |
| H  | 0.91446900  | 2.35110300  | 0.60818500  |
| H  | 3.76129200  | 2.97788000  | 1.40882000  |
| H  | 2.75607600  | 3.77912700  | 0.22316600  |
| H  | 3.21593500  | 2.19706900  | -1.49310200 |
| H  | 4.76612700  | 2.58979000  | -0.77503100 |
| H  | 4.18251600  | 0.03677800  | -1.29653400 |

|   |            |             |            |
|---|------------|-------------|------------|
| H | 4.47181800 | -1.13465400 | 0.69520800 |
| H | 4.76024300 | 1.47932100  | 2.18810400 |
| H | 4.95067100 | -0.14787800 | 2.79585400 |
| H | 2.62938900 | -0.47075600 | 3.17773900 |
| H | 2.99151800 | 1.12486400  | 3.80713400 |

### TS5<sub>A</sub>

SCF Energy (a.u.) = -1346.290628

Thermal correction to Gibbs free energy (a.u.) = 0.459060

Charge = 0, Multiplicity = 1

|    |             |             |             |
|----|-------------|-------------|-------------|
| Ni | 2.17858200  | -0.78879800 | -0.27610400 |
| C  | -0.98642700 | -2.16685700 | -0.89620300 |
| C  | -1.53982800 | -2.14987000 | 0.38713200  |
| C  | -2.89421400 | -2.40414700 | 0.57879100  |
| C  | -3.74460800 | -2.69036800 | -0.50131700 |
| C  | -3.17776200 | -2.71936900 | -1.78809500 |
| C  | -1.82642300 | -2.46196800 | -1.97908900 |
| H  | -0.90928000 | -1.91329500 | 1.23784800  |
| H  | -3.30672800 | -2.37782200 | 1.58431800  |
| H  | -3.80160600 | -2.94012600 | -2.64869400 |
| H  | -1.41293100 | -2.47988000 | -2.98499400 |
| C  | -5.16842000 | -2.94344300 | -0.24263000 |
| C  | -6.11223400 | -3.26409600 | -1.13650400 |
| H  | -5.46025700 | -2.85227000 | 0.80336400  |
| H  | -7.14028000 | -3.42593100 | -0.82844800 |
| H  | -5.90451000 | -3.37746000 | -2.19694000 |
| C  | 0.62181100  | -0.24866500 | -1.44105500 |
| C  | 0.45104800  | -1.79459200 | -1.14364800 |
| H  | 1.02999100  | -2.16799200 | -0.24611500 |
| H  | 0.84632200  | -2.34752100 | -2.00034200 |
| H  | 0.53570200  | -0.16799100 | -2.52166700 |
| C  | -0.42146500 | 0.62674800  | -0.81179500 |
| C  | -0.41320400 | 0.92532200  | 0.55514700  |
| C  | -1.46854400 | 1.12584200  | -1.59404700 |

|    |             |             |             |
|----|-------------|-------------|-------------|
| C  | -1.42575300 | 1.68435300  | 1.13820800  |
| H  | 0.39705500  | 0.55282800  | 1.17143300  |
| C  | -2.49660200 | 1.88373100  | -1.03278600 |
| H  | -1.49599700 | 0.90458400  | -2.65744100 |
| C  | -2.45964200 | 2.14727600  | 0.33146900  |
| H  | -1.40890100 | 1.90653300  | 2.19944800  |
| H  | -3.30942400 | 2.25458000  | -1.64650400 |
| Br | -3.90149200 | 3.19838300  | 1.13983300  |
| C  | 3.86159100  | 2.67062600  | -2.79131100 |
| C  | 3.84399200  | 1.36208100  | -3.28805200 |
| C  | 3.05424100  | 0.38967300  | -2.68200300 |
| C  | 2.28578300  | 0.68914500  | -1.53564200 |
| C  | 2.27537100  | 2.01698000  | -1.07691900 |
| C  | 3.06774600  | 2.99018100  | -1.68996000 |
| H  | 4.47277200  | 3.43090000  | -3.26877400 |
| H  | 4.44538300  | 1.10093100  | -4.15543800 |
| H  | 3.04335300  | -0.62007600 | -3.08703600 |
| H  | 1.65612000  | 2.29043800  | -0.22952700 |
| H  | 3.05929500  | 4.00561300  | -1.30132600 |
| C  | 1.34236100  | -1.08409600 | 2.92725300  |
| C  | 1.99919900  | 0.06599400  | 3.12291600  |
| C  | 3.48388700  | 0.31165000  | 3.07424900  |
| C  | 4.03211600  | 0.63707500  | 1.67087300  |
| C  | 3.94131200  | -0.43365600 | 0.60157600  |
| C  | 3.59428600  | -1.78993600 | 0.71987400  |
| C  | 3.27764000  | -2.58463400 | 1.98765400  |
| C  | 1.87072600  | -2.45606400 | 2.60082200  |
| H  | 0.25633000  | -1.04455100 | 3.02227800  |
| H  | 1.39276700  | 0.94862900  | 3.32917100  |
| H  | 4.03328100  | -0.53312900 | 3.49548800  |
| H  | 3.71083300  | 1.16843000  | 3.72039400  |
| H  | 3.55046500  | 1.54853800  | 1.29252700  |
| H  | 5.09554500  | 0.89699900  | 1.78535400  |
| H  | 4.55157600  | -0.17974100 | -0.26467000 |

|   |            |             |             |
|---|------------|-------------|-------------|
| H | 3.98886900 | -2.42313500 | -0.07900900 |
| H | 4.03169900 | -2.37515800 | 2.75363700  |
| H | 3.40616700 | -3.64586600 | 1.74303000  |
| H | 1.15447200 | -2.92870000 | 1.91427100  |
| H | 1.83593000 | -3.07491900 | 3.51167100  |

**im10<sub>A</sub>**

SCF Energy (a.u.) = -1346.344997

Thermal correction to Gibbs free energy (a.u.) = 0.460069

Charge = 0, Multiplicity = 1

|    |             |             |             |
|----|-------------|-------------|-------------|
| Ni | 2.70887800  | 0.19249300  | -0.00983100 |
| C  | -1.35935700 | 2.23198700  | 0.16516100  |
| C  | -2.05655000 | 1.78004800  | -0.95931000 |
| C  | -3.36531500 | 2.18814900  | -1.19918500 |
| C  | -4.02787600 | 3.06487400  | -0.32500800 |
| C  | -3.32003500 | 3.52465500  | 0.79987900  |
| C  | -2.01268300 | 3.11629600  | 1.03540000  |
| H  | -1.57648400 | 1.08077800  | -1.63846500 |
| H  | -3.89059700 | 1.81781000  | -2.07611100 |
| H  | -3.79678800 | 4.20748800  | 1.49652800  |
| H  | -1.48706300 | 3.48274700  | 1.91476400  |
| C  | -5.41283200 | 3.45731600  | -0.62063500 |
| C  | -6.18925800 | 4.29203100  | 0.08151700  |
| H  | -5.82893400 | 3.00097500  | -1.51863000 |
| H  | -7.20531200 | 4.50721100  | -0.23382600 |
| H  | -5.85089800 | 4.78977700  | 0.98614000  |
| C  | 0.01540100  | 0.52544800  | 1.48619000  |
| C  | 0.02148200  | 1.72019800  | 0.48141800  |
| H  | 0.52599000  | 1.38781000  | -0.43416200 |
| H  | 0.62342800  | 2.53167900  | 0.90342000  |
| H  | -0.37381300 | 0.92507400  | 2.43478500  |
| C  | -0.97594400 | -0.52739500 | 1.01998800  |
| C  | -0.64494600 | -1.48537100 | 0.05424500  |
| C  | -2.29456600 | -0.48770100 | 1.48560200  |

|    |             |             |             |
|----|-------------|-------------|-------------|
| C  | -1.60063500 | -2.36692100 | -0.45173400 |
| H  | 0.37752600  | -1.55178800 | -0.29669700 |
| C  | -3.26940300 | -1.35574700 | 0.99349300  |
| H  | -2.57772400 | 0.25577500  | 2.22488300  |
| C  | -2.90456300 | -2.28119400 | 0.02341700  |
| H  | -1.33077600 | -3.10403900 | -1.19959700 |
| H  | -4.28987100 | -1.30329100 | 1.35488300  |
| Br | -4.26239200 | -3.50029200 | -0.69201400 |
| C  | 3.85394600  | -0.87632700 | 2.99335500  |
| C  | 3.74229100  | 0.41615100  | 2.52445500  |
| C  | 2.54388700  | 0.87841600  | 1.89981300  |
| C  | 1.42091800  | -0.01313000 | 1.77364700  |
| C  | 1.56050700  | -1.32087900 | 2.33617300  |
| C  | 2.73868100  | -1.74549000 | 2.91068100  |
| H  | 4.77502500  | -1.21300800 | 3.46025800  |
| H  | 4.56789400  | 1.11309800  | 2.64139500  |
| H  | 2.41788600  | 1.95269100  | 1.77738900  |
| H  | 0.70504200  | -1.98750700 | 2.31705900  |
| H  | 2.80671800  | -2.75002200 | 3.31905800  |
| C  | 2.20613900  | -0.26523600 | -1.92075900 |
| C  | 3.06192500  | -1.24688000 | -1.40724900 |
| C  | 4.54149000  | -1.40624100 | -1.73785100 |
| C  | 5.50392300  | -0.56979400 | -0.85612100 |
| C  | 5.09801700  | 0.86127200  | -0.58716700 |
| C  | 4.43249800  | 1.71193400  | -1.39781200 |
| C  | 3.97242000  | 1.42919100  | -2.80522600 |
| C  | 2.53760400  | 0.85671800  | -2.88486800 |
| H  | 1.13857300  | -0.48697300 | -1.89591200 |
| H  | 2.58857300  | -2.13928000 | -0.99626900 |
| H  | 4.71463100  | -1.18548600 | -2.79551900 |
| H  | 4.81559400  | -2.45931000 | -1.60743800 |
| H  | 5.58726800  | -1.06284900 | 0.12025200  |
| H  | 6.51176000  | -0.60066100 | -1.29829600 |
| H  | 5.41413800  | 1.24785100  | 0.37894700  |

|   |            |            |             |
|---|------------|------------|-------------|
| H | 4.22527600 | 2.71071100 | -1.01461200 |
| H | 4.67210000 | 0.75022800 | -3.29754300 |
| H | 3.99826100 | 2.36109600 | -3.38239700 |
| H | 1.82608200 | 1.67309900 | -2.69746000 |
| H | 2.34865200 | 0.53046500 | -3.92012500 |

**TS5<sub>B</sub>**

SCF Energy (a.u.) = -1034.174338

Thermal correction to Gibbs free energy (a.u.) = 0.279767

Charge = 0, Multiplicity = 1

|    |             |             |             |
|----|-------------|-------------|-------------|
| Ni | -1.18044600 | -2.43882300 | 0.37868800  |
| C  | 1.80713500  | -1.90999700 | 0.66869200  |
| C  | 2.18134700  | -2.56419200 | -0.50762300 |
| C  | 3.41341100  | -2.30359900 | -1.10440400 |
| C  | 4.31574600  | -1.38211900 | -0.55230000 |
| C  | 3.93592200  | -0.73024100 | 0.63487800  |
| C  | 2.70865500  | -0.98759300 | 1.22903500  |
| H  | 1.49365000  | -3.26818100 | -0.96424100 |
| H  | 3.67988400  | -2.81972800 | -2.02345000 |
| H  | 4.60424200  | -0.00955700 | 1.09545200  |
| H  | 2.43106300  | -0.45957200 | 2.13662300  |
| C  | 5.59567200  | -1.13782500 | -1.23159700 |
| C  | 6.55481900  | -0.27765500 | -0.86797300 |
| H  | 5.75275700  | -1.73605300 | -2.12882200 |
| H  | 7.46602000  | -0.17976300 | -1.44947800 |
| H  | 6.47405900  | 0.35734200  | 0.00984300  |
| C  | -0.43475000 | -1.09151400 | 1.61024500  |
| C  | 0.51311400  | -2.13753000 | 1.39027500  |
| H  | -0.17883400 | -3.55292300 | 0.32100100  |
| H  | 0.57406100  | -2.87101900 | 2.19288800  |
| H  | -1.02389600 | -1.17244500 | 2.52163800  |
| C  | -0.35585400 | 0.28825700  | 1.08175600  |
| C  | 0.19104400  | 0.61621200  | -0.17114300 |
| C  | -0.87010100 | 1.32889000  | 1.86913300  |

|    |             |             |             |
|----|-------------|-------------|-------------|
| C  | 0.23357700  | 1.93364500  | -0.61537800 |
| H  | 0.57478500  | -0.16612700 | -0.81492400 |
| C  | -0.83728600 | 2.65693100  | 1.44008600  |
| H  | -1.30537500 | 1.09862700  | 2.83817500  |
| C  | -0.28099600 | 2.93923200  | 0.19962300  |
| H  | 0.65470500  | 2.17129600  | -1.58547900 |
| H  | -1.23879900 | 3.44868700  | 2.06215700  |
| Br | -0.22753600 | 4.79346300  | -0.42470700 |
| C  | -5.04054300 | -1.53465200 | -1.46647900 |
| C  | -4.20573900 | -2.65468000 | -1.47505800 |
| C  | -3.04620400 | -2.59975100 | -0.69640300 |
| C  | -2.71490300 | -1.47891800 | 0.04946200  |
| C  | -3.54022400 | -0.36202400 | 0.05434400  |
| C  | -4.71116000 | -0.40180100 | -0.71109500 |
| H  | -5.95305300 | -1.54230000 | -2.05566900 |
| H  | -4.45496200 | -3.53473600 | -2.06086700 |
| H  | -2.36184800 | -3.49371700 | -0.69003700 |
| H  | -3.27700100 | 0.52976200  | 0.61726700  |
| H  | -5.37129000 | 0.46181200  | -0.72906700 |

**im10<sub>B</sub>**

SCF Energy (a.u.) = -1034.174362

Thermal correction to Gibbs free energy (a.u.) = 0.279565

Charge = 0, Multiplicity = 1

|    |             |             |             |
|----|-------------|-------------|-------------|
| Ni | -1.12769600 | -2.48765500 | 0.35450900  |
| C  | 1.82851100  | -1.86929700 | 0.67304900  |
| C  | 2.24501000  | -2.56628300 | -0.46455400 |
| C  | 3.47795900  | -2.29283100 | -1.05328900 |
| C  | 4.33985400  | -1.31565300 | -0.53280500 |
| C  | 3.91874000  | -0.62162200 | 0.61571000  |
| C  | 2.69067100  | -0.89209200 | 1.20255700  |
| H  | 1.58838100  | -3.31379400 | -0.89611100 |
| H  | 3.77723400  | -2.84302900 | -1.94202700 |
| H  | 4.55549200  | 0.14127300  | 1.05249600  |

|    |             |             |             |
|----|-------------|-------------|-------------|
| H  | 2.38241100  | -0.33338800 | 2.08124400  |
| C  | 5.62218200  | -1.06076900 | -1.20351000 |
| C  | 6.54493400  | -0.15035800 | -0.86903200 |
| H  | 5.81515200  | -1.69715400 | -2.06686000 |
| H  | 7.46228300  | -0.04991000 | -1.44036400 |
| H  | 6.42718700  | 0.52460200  | -0.02589100 |
| C  | -0.43143600 | -1.09835200 | 1.60426200  |
| C  | 0.53652000  | -2.11678900 | 1.38934500  |
| H  | -0.17781800 | -3.64314000 | 0.24747000  |
| H  | 0.59247600  | -2.87270200 | 2.17067000  |
| H  | -1.03825800 | -1.19796800 | 2.50189000  |
| C  | -0.37793400 | 0.28313600  | 1.07627400  |
| C  | 0.14639000  | 0.61550200  | -0.18467800 |
| C  | -0.88824900 | 1.31752600  | 1.87331900  |
| C  | 0.17106400  | 1.93330800  | -0.62848400 |
| H  | 0.52564000  | -0.16465500 | -0.83407300 |
| C  | -0.87200200 | 2.64653800  | 1.44532400  |
| H  | -1.30633300 | 1.08258400  | 2.84878000  |
| C  | -0.33815000 | 2.93402100  | 0.19631300  |
| H  | 0.57413100  | 2.17538700  | -1.60510500 |
| H  | -1.26971100 | 3.43464500  | 2.07440100  |
| Br | -0.30983100 | 4.78870000  | -0.42703400 |
| C  | -5.00384400 | -1.59162400 | -1.44443400 |
| C  | -4.15470800 | -2.70071900 | -1.46875000 |
| C  | -2.98764700 | -2.63331300 | -0.70293900 |
| C  | -2.66420600 | -1.51418500 | 0.04513400  |
| C  | -3.50251800 | -0.40776400 | 0.06755400  |
| C  | -4.68113200 | -0.45917800 | -0.68590300 |
| H  | -5.92240800 | -1.60772800 | -2.02388400 |
| H  | -4.39784500 | -3.58063900 | -2.05712600 |
| H  | -2.28936400 | -3.51919200 | -0.71097700 |
| H  | -3.24641700 | 0.48380300  | 0.63358200  |
| H  | -5.35274100 | 0.39563200  | -0.69095000 |

**P**

SCF Energy (a.u.) = -630.950078

Thermal correction to Gibbs free energy (a.u.) = 0.192888

Charge = 0, Multiplicity = 1

|    |             |             |             |
|----|-------------|-------------|-------------|
| C  | 2.49668300  | 1.42546900  | -0.01293200 |
| C  | 3.70538000  | 1.37302500  | 0.69875100  |
| C  | 4.47902900  | 0.21703000  | 0.71498500  |
| C  | 4.09036600  | -0.93006700 | 0.00492600  |
| C  | 2.89470600  | -0.86411100 | -0.73669600 |
| C  | 2.11856800  | 0.28389900  | -0.74746100 |
| H  | 4.03331600  | 2.24813800  | 1.25413000  |
| H  | 5.40466200  | 0.19865000  | 1.28499200  |
| H  | 2.57569400  | -1.72027900 | -1.32290700 |
| H  | 1.21096700  | 0.31068600  | -1.34013200 |
| C  | 4.94090700  | -2.12542100 | 0.05512300  |
| C  | 4.70558800  | -3.31267500 | -0.51835400 |
| H  | 5.85653600  | -2.00559900 | 0.63388300  |
| H  | 5.40945100  | -4.13216600 | -0.41338600 |
| H  | 3.81449800  | -3.51605500 | -1.10555900 |
| C  | 0.38076800  | 2.84476000  | -0.09513600 |
| C  | 1.71592600  | 2.67123200  | -0.02181100 |
| H  | 2.31747900  | 3.57857100  | 0.02502600  |
| H  | 0.02914200  | 3.87149600  | -0.18955400 |
| C  | -0.69237100 | 1.83820300  | -0.04239000 |
| C  | -0.61394800 | 0.69324800  | 0.76999600  |
| C  | -1.87181000 | 2.04903500  | -0.77496700 |
| C  | -1.65744800 | -0.22626400 | 0.82401000  |
| H  | 0.27243300  | 0.52461600  | 1.37084600  |
| C  | -2.92543700 | 1.13640000  | -0.73895400 |
| H  | -1.96286300 | 2.93845400  | -1.39291200 |
| C  | -2.79833000 | 0.00582900  | 0.05991100  |
| H  | -1.58604300 | -1.10356000 | 1.45676100  |
| H  | -3.82548500 | 1.30657300  | -1.31858300 |
| Br | -4.26746400 | -1.28505900 | 0.12638300  |

### 3

SCF Energy (a.u.) = -232.2775

Thermal correction to Gibbs free energy (a.u.) = 0.073396

Charge = 0, Multiplicity = 1

|   |             |             |             |
|---|-------------|-------------|-------------|
| C | -1.33846600 | -0.39754200 | 0.00000400  |
| C | -0.32483700 | -1.35790600 | 0.00006600  |
| C | 1.01349800  | -0.96036500 | -0.00005400 |
| C | 1.33843100  | 0.39765300  | 0.00000700  |
| C | 0.32495000  | 1.35787600  | 0.00006000  |
| C | -1.01357700 | 0.96028600  | -0.00005600 |
| H | -2.37973500 | -0.70694700 | -0.00006500 |
| H | -0.57774600 | -2.41433100 | 0.00008000  |
| H | 1.80212100  | -1.70738400 | -0.00015000 |
| H | 2.37977200  | 0.70679300  | 0.00000900  |
| H | 0.57761100  | 2.41435300  | 0.00001600  |
| H | -1.80202000 | 1.70750500  | -0.00006000 |

### im1a

SCF Energy (a.u.) = -1346.363384

Thermal correction to Gibbs free energy (a.u.) = 0.459968

Charge = 0, Multiplicity = 1

|   |             |             |             |
|---|-------------|-------------|-------------|
| C | -4.01025300 | -0.74736900 | -0.98645400 |
| C | -4.86700800 | -1.80192700 | -0.63811800 |
| C | -6.23244700 | -1.59941700 | -0.47972400 |
| C | -6.79932400 | -0.32584900 | -0.66690100 |
| C | -5.93832700 | 0.72542200  | -1.01935000 |
| C | -4.57020500 | 0.51952900  | -1.17493400 |
| H | -4.45206700 | -2.79636200 | -0.48820100 |
| H | -6.86606300 | -2.43920000 | -0.21115600 |
| H | -6.35137200 | 1.72023100  | -1.16781400 |
| H | -3.92383200 | 1.35551200  | -1.42757300 |
| C | -8.23484300 | -0.05274600 | -0.51162400 |
| C | -9.19820200 | -0.92296500 | -0.18396300 |

|    |              |             |             |
|----|--------------|-------------|-------------|
| H  | -8.51817900  | 0.98477600  | -0.68857100 |
| H  | -10.23215800 | -0.60434000 | -0.09686900 |
| H  | -9.00111100  | -1.97407600 | 0.00790500  |
| C  | -1.83014200  | -0.92094100 | 0.30942600  |
| C  | -2.52224400  | -0.96765200 | -1.07899000 |
| H  | -2.31627700  | -1.94343300 | -1.53512400 |
| H  | -2.07315600  | -0.20377400 | -1.72404000 |
| H  | -2.33204000  | -1.66971000 | 0.93792200  |
| C  | -0.34966900  | -1.25827900 | 0.26783700  |
| C  | 0.31536700   | -1.42826300 | 1.52534000  |
| C  | 0.38054100   | -1.36880200 | -0.89246400 |
| C  | 1.66562200   | -1.63721200 | 1.60249800  |
| H  | -0.27419000  | -1.37825400 | 2.43707400  |
| C  | 1.80607100   | -1.55999800 | -0.88663500 |
| H  | -0.11188200  | -1.32308400 | -1.85879900 |
| C  | 2.44438500   | -1.59756700 | 0.40354000  |
| H  | 2.15912600   | -1.78759100 | 2.55704900  |
| H  | 2.28206300   | -1.99100100 | -1.76375300 |
| Br | 4.25070600   | -2.49710700 | 0.49371900  |
| C  | -2.49941000  | 2.98425500  | 2.07192900  |
| C  | -3.37114400  | 1.93060400  | 2.35031300  |
| C  | -3.14487800  | 0.66787300  | 1.80032800  |
| C  | -2.04656200  | 0.43862400  | 0.96532800  |
| C  | -1.17453000  | 1.50060800  | 0.69787300  |
| C  | -1.39745700  | 2.76431200  | 1.24227200  |
| H  | -2.67403400  | 3.96677400  | 2.50143500  |
| H  | -4.23072800  | 2.09031000  | 2.99535000  |
| H  | -3.83605600  | -0.14449400 | 2.00714100  |
| H  | -0.30748400  | 1.32056500  | 0.07130600  |
| H  | -0.70832100  | 3.57635200  | 1.02317800  |
| Ni | 2.75504100   | 0.13614200  | -0.42876800 |
| C  | 2.92390900   | 1.78279200  | 0.91278500  |
| C  | 4.13788600   | 1.14209100  | 0.82425700  |
| C  | 5.27641100   | 1.48360300  | -0.11204500 |

|   |            |            |             |
|---|------------|------------|-------------|
| C | 4.83050200 | 1.94496400 | -1.52650800 |
| C | 3.62972700 | 1.18379100 | -2.05787000 |
| C | 2.32279200 | 1.59202200 | -1.94000000 |
| C | 1.85179400 | 2.82348300 | -1.19849700 |
| C | 2.54409900 | 3.05532900 | 0.17676400  |
| H | 2.24962800 | 1.47058900 | 1.70898400  |
| H | 4.36895400 | 0.39042500 | 1.57511600  |
| H | 5.89006600 | 0.58119800 | -0.21291100 |
| H | 5.93035900 | 2.25213800 | 0.32760800  |
| H | 4.61314700 | 3.01671900 | -1.52225100 |
| H | 5.67220700 | 1.80824500 | -2.21449800 |
| H | 3.84379200 | 0.35676700 | -2.73425600 |
| H | 1.57233900 | 1.08684400 | -2.54458500 |
| H | 0.77273700 | 2.72896600 | -1.04562500 |
| H | 1.98771000 | 3.72171400 | -1.81961200 |
| H | 3.43346200 | 3.67753600 | 0.04270100  |
| H | 1.86272300 | 3.63450800 | 0.80974400  |

### TS1a

SCF Energy (a.u.) = -1346.360421

Thermal correction to Gibbs free energy (a.u.) = 0.460622

Charge = 0, Multiplicity = 1

|   |             |             |             |
|---|-------------|-------------|-------------|
| C | -4.24073800 | -0.88973500 | -0.85582400 |
| C | -5.07341800 | -1.86708500 | -0.29162400 |
| C | -6.42720700 | -1.63027000 | -0.08682700 |
| C | -7.00527600 | -0.39796200 | -0.44035900 |
| C | -6.16783900 | 0.57663300  | -1.00602600 |
| C | -4.81165400 | 0.33679800  | -1.20941200 |
| H | -4.64920800 | -2.82859000 | -0.01035300 |
| H | -7.04268800 | -2.41123600 | 0.34916400  |
| H | -6.59003800 | 1.53864600  | -1.28629200 |
| H | -4.18337300 | 1.11589600  | -1.63191600 |
| C | -8.42921700 | -0.09113300 | -0.24590900 |
| C | -9.37043300 | -0.88987400 | 0.27252500  |

|    |              |             |             |
|----|--------------|-------------|-------------|
| H  | -8.72353300  | 0.90745100  | -0.56874000 |
| H  | -10.39764900 | -0.55263000 | 0.36875300  |
| H  | -9.16121300  | -1.89877700 | 0.61725300  |
| C  | -1.98768800  | -0.79774700 | 0.30180200  |
| C  | -2.76030600  | -1.13529000 | -1.00151300 |
| H  | -2.57297100  | -2.18592200 | -1.25360800 |
| H  | -2.36441000  | -0.52705500 | -1.82238400 |
| H  | -2.46702400  | -1.36861600 | 1.10746600  |
| C  | -0.51921200  | -1.18089100 | 0.26693800  |
| C  | 0.15799100   | -1.32985000 | 1.50706600  |
| C  | 0.20099300   | -1.34497000 | -0.90616600 |
| C  | 1.51811400   | -1.54163400 | 1.57947600  |
| H  | -0.41413400  | -1.23702300 | 2.42754000  |
| C  | 1.59910800   | -1.56686500 | -0.88717500 |
| H  | -0.30538400  | -1.33864600 | -1.86646700 |
| C  | 2.24959900   | -1.52298100 | 0.37128800  |
| H  | 2.03077600   | -1.61936800 | 2.53197900  |
| H  | 2.11350000   | -1.89594700 | -1.78196000 |
| Br | 4.25470700   | -2.39562400 | 0.32765200  |
| C  | -2.51772500  | 3.41632700  | 1.17596300  |
| C  | -3.26399200  | 2.45752500  | 1.86102200  |
| C  | -3.07765500  | 1.10043100  | 1.59161300  |
| C  | -2.14232900  | 0.68085600  | 0.64135100  |
| C  | -1.39321800  | 1.65093500  | -0.03734300 |
| C  | -1.58206900  | 3.00768700  | 0.22212500  |
| H  | -2.66246400  | 4.47299600  | 1.38226800  |
| H  | -3.99652600  | 2.76384900  | 2.60259200  |
| H  | -3.67748800  | 0.35776100  | 2.11079500  |
| H  | -0.65291200  | 1.33631500  | -0.76724600 |
| H  | -0.99919400  | 3.74713800  | -0.32089900 |
| Ni | 3.18691600   | -0.08920200 | -0.34259200 |
| C  | 2.51737500   | 1.58235000  | 0.80475700  |
| C  | 3.72881000   | 1.14028600  | 1.29833100  |
| C  | 5.09907900   | 1.67659500  | 0.93986800  |

|   |            |            |             |
|---|------------|------------|-------------|
| C | 5.27196200 | 2.02488100 | -0.56237400 |
| C | 4.55761000 | 1.05936500 | -1.49241900 |
| C | 3.28506400 | 1.22247000 | -1.99485000 |
| C | 2.31446400 | 2.33105000 | -1.64184500 |
| C | 2.32872700 | 2.75002500 | -0.14692700 |
| H | 1.61079600 | 1.20397500 | 1.27078100  |
| H | 3.70616300 | 0.45739800 | 2.14556500  |
| H | 5.82990900 | 0.90491300 | 1.20616700  |
| H | 5.34999800 | 2.56042500 | 1.54685500  |
| H | 4.92798100 | 3.04437300 | -0.75664400 |
| H | 6.34171700 | 2.01730200 | -0.79923600 |
| H | 5.17420800 | 0.28329800 | -1.94455900 |
| H | 2.99275900 | 0.59862000 | -2.83807500 |
| H | 1.30947500 | 1.97492600 | -1.89641000 |
| H | 2.49280400 | 3.21700700 | -2.27076800 |
| H | 3.10329200 | 3.50250700 | 0.02435800  |
| H | 1.37488000 | 3.23595000 | 0.08357900  |

**im2a**

SCF Energy (a.u.) = -1346.397459

Thermal correction to Gibbs free energy (a.u.) = 0.460400

Charge = 0, Multiplicity = 1

|   |            |             |             |
|---|------------|-------------|-------------|
| C | 4.68949700 | -0.83407200 | 0.85809000  |
| C | 5.25990100 | -1.91895100 | 0.17615600  |
| C | 6.62540000 | -1.97605900 | -0.07442700 |
| C | 7.48034900 | -0.94330700 | 0.35025800  |
| C | 6.90492000 | 0.14003300  | 1.03311300  |
| C | 5.53621700 | 0.19494900  | 1.28181300  |
| H | 4.61854900 | -2.73001200 | -0.16190900 |
| H | 7.03275300 | -2.83260800 | -0.60291800 |
| H | 7.54409000 | 0.95289400  | 1.36947700  |
| H | 5.11487900 | 1.05452600  | 1.79541200  |
| C | 8.93053400 | -0.94981200 | 0.11319400  |
| C | 9.65027000 | -1.89330600 | -0.50703000 |

|    |             |             |             |
|----|-------------|-------------|-------------|
| H  | 9.45389800  | -0.07388500 | 0.49663800  |
| H  | 10.72419900 | -1.78865600 | -0.62525800 |
| H  | 9.20706100  | -2.79691000 | -0.91636500 |
| C  | 2.47817800  | -0.14275100 | -0.17739500 |
| C  | 3.19742500  | -0.75338400 | 1.05684200  |
| H  | 2.78550400  | -1.75332400 | 1.23741200  |
| H  | 2.97512000  | -0.14431700 | 1.94008600  |
| H  | 2.79793600  | -0.73212800 | -1.04626700 |
| C  | 0.96127000  | -0.23062700 | -0.10434100 |
| C  | 0.22352300  | -0.10385600 | -1.28989800 |
| C  | 0.25712700  | -0.40041200 | 1.09037400  |
| C  | -1.16939600 | -0.14332500 | -1.28538400 |
| H  | 0.75310900  | 0.02693600  | -2.23131900 |
| C  | -1.14336500 | -0.43263300 | 1.10403300  |
| H  | 0.79028300  | -0.51647200 | 2.02907000  |
| C  | -1.86589000 | -0.29962700 | -0.08183500 |
| H  | -1.70905500 | -0.07556400 | -2.22663100 |
| H  | -1.65755000 | -0.58488600 | 2.05036200  |
| Br | -3.73239900 | -2.54972100 | -0.61380900 |
| C  | 3.92495900  | 3.90324800  | -0.73814900 |
| C  | 4.44390100  | 2.85818100  | -1.50272500 |
| C  | 3.95829100  | 1.56064400  | -1.33519800 |
| C  | 2.94870300  | 1.28702700  | -0.40690200 |
| C  | 2.43087600  | 2.34361200  | 0.35247800  |
| C  | 2.91565900  | 3.64099200  | 0.19143000  |
| H  | 4.30121900  | 4.91445400  | -0.86609000 |
| H  | 5.23030600  | 3.04996500  | -2.22758800 |
| H  | 4.37914700  | 0.74534000  | -1.91746000 |
| H  | 1.63632100  | 2.14525100  | 1.06679600  |
| H  | 2.50235800  | 4.44957500  | 0.78868500  |
| Ni | -3.74722800 | -0.28686400 | -0.01945400 |
| C  | -3.81375200 | 1.60455300  | 0.94332400  |
| C  | -3.82061600 | 1.75317200  | -0.43176600 |
| C  | -5.00669800 | 1.99931800  | -1.33530000 |

|   |             |             |             |
|---|-------------|-------------|-------------|
| C | -6.33590900 | 1.36422300  | -0.86678200 |
| C | -6.14678800 | -0.05424100 | -0.38532700 |
| C | -5.92475200 | -0.45221400 | 0.89243100  |
| C | -5.76089300 | 0.41623300  | 2.11809900  |
| C | -5.00769100 | 1.74396900  | 1.87234800  |
| H | -2.83798800 | 1.62267000  | 1.42123900  |
| H | -2.85616800 | 1.90839800  | -0.90854100 |
| H | -4.75268000 | 1.60127300  | -2.32515900 |
| H | -5.14014800 | 3.08332200  | -1.47159700 |
| H | -6.80010700 | 1.97516900  | -0.08970600 |
| H | -7.03207100 | 1.36121300  | -1.71234500 |
| H | -6.24205800 | -0.83721500 | -1.13427900 |
| H | -5.90088000 | -1.52358500 | 1.07316300  |
| H | -5.20674600 | -0.16903200 | 2.86059000  |
| H | -6.74133300 | 0.62644100  | 2.56964900  |
| H | -5.69057500 | 2.50505400  | 1.48658400  |
| H | -4.65052500 | 2.11908800  | 2.83715200  |

**im3a**

SCF Energy (a.u.) = -1356.764525

Thermal correction to Gibbs free energy (a.u.) = 0.399753

Charge = 0, Multiplicity = 1

|   |            |             |             |
|---|------------|-------------|-------------|
| C | 3.72452900 | -0.06541000 | -0.66418300 |
| C | 4.23804500 | 0.96913200  | 0.13235000  |
| C | 5.59803400 | 1.06380400  | 0.40167800  |
| C | 6.50332100 | 0.12171200  | -0.11865200 |
| C | 5.98406900 | -0.91064400 | -0.91620700 |
| C | 4.62094100 | -1.00426500 | -1.18377700 |
| H | 3.55638700 | 1.71151200  | 0.54123100  |
| H | 5.96146700 | 1.87949000  | 1.01941800  |
| H | 6.66336100 | -1.65275500 | -1.32868200 |
| H | 4.24431600 | -1.82332300 | -1.78982000 |
| C | 7.95033700 | 0.17146200  | 0.13272000  |
| C | 8.62018700 | 1.07674200  | 0.85697400  |

|    |             |             |             |
|----|-------------|-------------|-------------|
| H  | 8.51733900  | -0.63288300 | -0.33587500 |
| H  | 9.69727400  | 1.01141100  | 0.97450200  |
| H  | 8.13163700  | 1.90965000  | 1.35508200  |
| C  | 1.54212200  | -0.98232300 | 0.24919700  |
| C  | 2.23912900  | -0.18587100 | -0.88685400 |
| H  | 1.79542500  | 0.81388400  | -0.93670000 |
| H  | 2.04085200  | -0.68190100 | -1.84387300 |
| H  | 1.84881200  | -0.50763300 | 1.19126400  |
| C  | 0.02152000  | -0.91788300 | 0.19166300  |
| C  | -0.71344900 | -1.42150500 | 1.27393300  |
| C  | -0.68161600 | -0.38067200 | -0.89060100 |
| C  | -2.10697100 | -1.34272500 | 1.30705800  |
| H  | -0.18492900 | -1.88345200 | 2.10471600  |
| C  | -2.07771600 | -0.29795100 | -0.87632300 |
| H  | -0.15091900 | -0.00575300 | -1.75883900 |
| C  | -2.77530600 | -0.73643200 | 0.24387200  |
| H  | -2.65072600 | -1.73698800 | 2.16070000  |
| H  | -2.59946900 | 0.13444000  | -1.72346500 |
| Br | -5.36640300 | -1.89034100 | -1.01048400 |
| C  | 3.08767700  | -5.02633600 | 0.24977700  |
| C  | 3.58820300  | -4.08363900 | 1.14795000  |
| C  | 3.07103700  | -2.78742400 | 1.16146200  |
| C  | 2.04882000  | -2.41595300 | 0.28265900  |
| C  | 1.54963000  | -3.37015200 | -0.61264700 |
| C  | 2.06549600  | -4.66514400 | -0.63145800 |
| H  | 3.48763800  | -6.03635200 | 0.23749700  |
| H  | 4.38385100  | -4.35388700 | 1.83673000  |
| H  | 3.47658100  | -2.04901900 | 1.84798900  |
| H  | 0.74461100  | -3.09682800 | -1.28951700 |
| H  | 1.66541200  | -5.39461100 | -1.33031200 |
| Ni | -4.56980800 | -0.29228800 | 0.37574600  |
| C  | -4.31039300 | 1.68779100  | 1.11605200  |
| C  | -4.58677100 | 0.76266200  | 2.11100400  |
| H  | -5.61318600 | 0.61339300  | 2.44360900  |

|    |             |            |             |
|----|-------------|------------|-------------|
| H  | -3.81636600 | 0.38911400 | 2.77709700  |
| H  | -5.15401200 | 2.16587100 | 0.61514900  |
| C  | -2.99625100 | 2.25183600 | 0.78194900  |
| C  | -1.85242400 | 2.00287600 | 1.55720100  |
| C  | -2.86071400 | 3.01198400 | -0.38942600 |
| C  | -0.60253800 | 2.45626400 | 1.15394100  |
| H  | -1.92735400 | 1.42398300 | 2.46962600  |
| C  | -1.61668500 | 3.48108500 | -0.80574400 |
| H  | -3.73707100 | 3.21578800 | -0.99923200 |
| C  | -0.50160100 | 3.18407700 | -0.02932300 |
| H  | 0.27845900  | 2.23879300 | 1.74604900  |
| H  | -1.51853400 | 4.05527500 | -1.71968300 |
| Br | 1.25754000  | 3.79303400 | -0.61417400 |

### TS2a

SCF Energy (a.u.) = -1356.747612

Thermal correction to Gibbs free energy (a.u.) = 0.398522

Charge = 0, Multiplicity = 1

|   |              |             |             |
|---|--------------|-------------|-------------|
| C | -5.18473800  | 1.66280000  | 0.02904900  |
| C | -5.88674000  | 2.09650100  | -1.10471000 |
| C | -7.26337000  | 2.28283300  | -1.07246500 |
| C | -7.99607100  | 2.04128000  | 0.10330500  |
| C | -7.28790700  | 1.60905500  | 1.23595400  |
| C | -5.90890900  | 1.42191600  | 1.20047400  |
| H | -5.34163500  | 2.29109700  | -2.02602100 |
| H | -7.77430000  | 2.62251400  | -1.96817500 |
| H | -7.83156500  | 1.41327200  | 2.15689900  |
| H | -5.38941700  | 1.06736200  | 2.08617400  |
| C | -9.45187800  | 2.21984400  | 0.19583000  |
| C | -10.28471300 | 2.62423200  | -0.77128900 |
| H | -9.87343300  | 1.98873900  | 1.17393600  |
| H | -11.35008200 | 2.71917200  | -0.58671100 |
| H | -9.94605000  | 2.87501700  | -1.77275700 |
| C | -3.40095300  | -0.03217400 | -0.57804000 |

|    |             |             |             |
|----|-------------|-------------|-------------|
| C  | -3.70288400 | 1.39359000  | -0.04402600 |
| H  | -3.22166100 | 2.12551400  | -0.70430200 |
| H  | -3.25609700 | 1.50609800  | 0.95023400  |
| H  | -3.91633100 | -0.12038300 | -1.54343400 |
| C  | -1.92394700 | -0.29743100 | -0.83011000 |
| C  | -1.56822300 | -1.44768800 | -1.55164700 |
| C  | -0.90178700 | 0.53461100  | -0.35812000 |
| C  | -0.23569500 | -1.76809800 | -1.79542200 |
| H  | -2.35279200 | -2.10468000 | -1.91844800 |
| C  | 0.44142800  | 0.23012800  | -0.59228800 |
| H  | -1.14248400 | 1.43373500  | 0.19876500  |
| C  | 0.77822400  | -0.94875100 | -1.27152800 |
| H  | 0.01340500  | -2.65941600 | -2.36460500 |
| H  | 1.21864200  | 0.89178500  | -0.22027500 |
| Br | 3.47230600  | -3.14968300 | 0.81360200  |
| C  | -5.16375500 | -2.92604800 | 2.11782100  |
| C  | -5.81651800 | -2.57933300 | 0.93468300  |
| C  | -5.23415300 | -1.66398100 | 0.05709200  |
| C  | -3.99530900 | -1.08476400 | 0.34789400  |
| C  | -3.34576300 | -1.44024800 | 1.53647400  |
| C  | -3.92531900 | -2.35314500 | 2.41664500  |
| H  | -5.61403400 | -3.63980100 | 2.80176700  |
| H  | -6.78097500 | -3.01777900 | 0.69418200  |
| H  | -5.75426500 | -1.37957900 | -0.85368400 |
| H  | -2.37683700 | -1.00632100 | 1.76897600  |
| H  | -3.40699500 | -2.62165900 | 3.33288200  |
| Ni | 2.31574900  | -1.81274000 | -0.64824200 |
| C  | 3.70376700  | -1.05717200 | -1.80029400 |
| C  | 2.48137000  | -0.88586600 | -2.51380200 |
| H  | 2.21426000  | -1.63356600 | -3.25517100 |
| H  | 2.14181500  | 0.11243400  | -2.76301300 |
| H  | 4.30487900  | -1.93483000 | -2.02937200 |
| C  | 4.42563200  | 0.03814700  | -1.12541700 |
| C  | 3.96356700  | 1.36470600  | -1.11473500 |

|    |            |             |             |
|----|------------|-------------|-------------|
| C  | 5.62457200 | -0.25564200 | -0.45363400 |
| C  | 4.66919600 | 2.36835400  | -0.45501300 |
| H  | 3.04820200 | 1.63244900  | -1.63227500 |
| C  | 6.34217600 | 0.73410400  | 0.20976100  |
| H  | 5.97808000 | -1.28155800 | -0.42699700 |
| C  | 5.85148700 | 2.03740800  | 0.20011000  |
| H  | 4.30639800 | 3.38974800  | -0.45698600 |
| H  | 7.26125600 | 0.49309300  | 0.73097100  |
| Br | 6.84724600 | 3.43766100  | 1.12533800  |

#### im4a

SCF Energy (a.u.) = -1356.784160

Thermal correction to Gibbs free energy (a.u.) = 0.403055

Charge = 0, Multiplicity = 1

|   |             |            |             |
|---|-------------|------------|-------------|
| C | 4.60656900  | 1.75114000 | 0.08798900  |
| C | 5.55151200  | 2.17984400 | 1.03096900  |
| C | 6.89226900  | 2.32111800 | 0.69422800  |
| C | 7.34201000  | 2.03748300 | -0.60759200 |
| C | 6.39100400  | 1.61004600 | -1.54793600 |
| C | 5.04863100  | 1.46793500 | -1.20780300 |
| H | 5.22737700  | 2.40701100 | 2.04448500  |
| H | 7.59650500  | 2.65813200 | 1.44865500  |
| H | 6.71366400  | 1.38233300 | -2.56083400 |
| H | 4.33774600  | 1.11678400 | -1.95028400 |
| C | 8.74642800  | 2.16817100 | -1.02047800 |
| C | 9.78106100  | 2.56569600 | -0.26951900 |
| H | 8.93725400  | 1.90454000 | -2.06058600 |
| H | 10.78229300 | 2.62336200 | -0.68462300 |
| H | 9.67654800  | 2.84748900 | 0.77461100  |
| C | 2.95166500  | 0.11972400 | 1.09159300  |
| C | 3.16944800  | 1.53145600 | 0.48855000  |
| H | 2.86887800  | 2.28334600 | 1.22883800  |
| H | 2.51795700  | 1.65102900 | -0.38447400 |
| H | 3.65657500  | 0.01652300 | 1.92728600  |

|    |             |             |             |
|----|-------------|-------------|-------------|
| C  | 1.55515200  | -0.11110300 | 1.64181300  |
| C  | 1.32196300  | -1.29398200 | 2.38592300  |
| C  | 0.48253000  | 0.73474000  | 1.39081800  |
| C  | 0.05278300  | -1.64833500 | 2.79709900  |
| H  | 2.15918900  | -1.95540500 | 2.58922300  |
| C  | -0.82658200 | 0.38969800  | 1.79934800  |
| H  | 0.62587500  | 1.66261900  | 0.84957900  |
| C  | -1.06339200 | -0.82668000 | 2.49009500  |
| H  | -0.10969600 | -2.57672700 | 3.33721700  |
| H  | -1.63086700 | 1.10344900  | 1.65351700  |
| Br | -1.53773200 | -2.29850600 | -1.55409800 |
| C  | 3.94537500  | -2.90176600 | -1.84841600 |
| C  | 4.86422000  | -2.55916800 | -0.85539100 |
| C  | 4.53563800  | -1.59750800 | 0.10109300  |
| C  | 3.28909100  | -0.96482200 | 0.07435000  |
| C  | 2.37514700  | -1.31134100 | -0.92862200 |
| C  | 2.69743700  | -2.27549200 | -1.88234200 |
| H  | 4.19757000  | -3.65570800 | -2.58867800 |
| H  | 5.83823200  | -3.03941700 | -0.82318100 |
| H  | 5.25807800  | -1.32172900 | 0.86473300  |
| H  | 1.39648000  | -0.84161700 | -0.96497200 |
| H  | 1.96490700  | -2.54106900 | -2.63864800 |
| Ni | -1.41623600 | -1.20401200 | 0.45327700  |
| C  | -3.08862400 | -1.43945200 | 1.37133300  |
| C  | -2.49781100 | -1.26339300 | 2.77414100  |
| H  | -2.49224400 | -2.21471700 | 3.31281000  |
| H  | -3.03598600 | -0.53721900 | 3.39264800  |
| H  | -3.35862600 | -2.46819500 | 1.12856400  |
| C  | -4.05211700 | -0.45621200 | 0.82886200  |
| C  | -4.31485600 | 0.78710900  | 1.43062800  |
| C  | -4.73584700 | -0.76372400 | -0.36490500 |
| C  | -5.21643900 | 1.69195000  | 0.87058800  |
| H  | -3.82666900 | 1.06263400  | 2.35965300  |
| C  | -5.63855700 | 0.12448400  | -0.93669600 |

|    |             |             |             |
|----|-------------|-------------|-------------|
| H  | -4.52661900 | -1.70564000 | -0.86198900 |
| C  | -5.86581400 | 1.34782700  | -0.30901200 |
| H  | -5.41099800 | 2.64397700  | 1.35119700  |
| H  | -6.15082500 | -0.12783100 | -1.85796000 |
| Br | -7.12962100 | 2.60826900  | -1.10312400 |

### im5a

SCF Energy (a.u.) = -1497.827002

Thermal correction to Gibbs free energy (a.u.) = 0.468592

Charge = 0, Multiplicity = 1

|   |              |             |             |
|---|--------------|-------------|-------------|
| C | -4.56082500  | -1.72820000 | 0.07567200  |
| C | -5.56765000  | -2.10881000 | 0.97431200  |
| C | -6.89493100  | -2.19957900 | 0.57296700  |
| C | -7.26869600  | -1.91123100 | -0.75166000 |
| C | -6.25620900  | -1.53212300 | -1.64745900 |
| C | -4.92739500  | -1.44080700 | -1.24263600 |
| H | -5.30290700  | -2.33847300 | 2.00434400  |
| H | -7.64830500  | -2.50075700 | 1.29438800  |
| H | -6.51942800  | -1.30235400 | -2.67699100 |
| H | -4.16708200  | -1.12733100 | -1.95232800 |
| C | -8.65536300  | -1.98929800 | -1.23220200 |
| C | -9.74163400  | -2.33321500 | -0.52920800 |
| H | -8.78352800  | -1.73205100 | -2.28348800 |
| H | -10.72268600 | -2.35508600 | -0.99307000 |
| H | -9.70074100  | -2.60457100 | 0.52209000  |
| C | -2.89202000  | -0.15259800 | 1.14143900  |
| C | -3.13708400  | -1.56182700 | 0.54416700  |
| H | -2.90199700  | -2.31446900 | 1.30698200  |
| H | -2.44999800  | -1.71939100 | -0.29469900 |
| H | -3.63739400  | -0.00561000 | 1.93397200  |
| C | -1.51571000  | 0.03399200  | 1.75474000  |
| C | -1.28423700  | 1.20258600  | 2.51940100  |
| C | -0.44559600  | -0.81580200 | 1.50903200  |
| C | -0.01259600  | 1.55649600  | 2.92399900  |

|    |             |             |             |
|----|-------------|-------------|-------------|
| H  | -2.12161900 | 1.86059200  | 2.73460400  |
| C  | 0.86613300  | -0.46793700 | 1.91068000  |
| H  | -0.58899400 | -1.74046800 | 0.96158500  |
| C  | 1.10550300  | 0.75092700  | 2.58854400  |
| H  | 0.15043600  | 2.48028400  | 3.47224100  |
| H  | 1.67577900  | -1.17353100 | 1.75058400  |
| C  | -3.57155200 | 2.89079100  | -1.87088200 |
| C  | -4.55520600 | 2.60807700  | -0.92251600 |
| C  | -4.32908100 | 1.63555800  | 0.05315900  |
| C  | -3.12155300 | 0.93236500  | 0.09253300  |
| C  | -2.14200700 | 1.21807300  | -0.86808500 |
| C  | -2.36255700 | 2.19176600  | -1.84097500 |
| H  | -3.74384700 | 3.65219100  | -2.62635200 |
| H  | -5.50052500 | 3.14331600  | -0.93979600 |
| H  | -5.10238700 | 1.40840600  | 0.78220200  |
| H  | -1.19035100 | 0.69469900  | -0.85693700 |
| H  | -1.58325600 | 2.40430700  | -2.56662300 |
| Ni | 1.38418800  | 1.10171900  | 0.49477200  |
| C  | 3.05453700  | 1.43298100  | 1.37207000  |
| C  | 2.53745300  | 1.22743200  | 2.80409300  |
| H  | 2.53046900  | 2.17287200  | 3.35399800  |
| H  | 3.12645200  | 0.51390600  | 3.39083900  |
| H  | 3.29627300  | 2.47283200  | 1.13952100  |
| C  | 4.04461000  | 0.49116100  | 0.79254400  |
| C  | 4.41029100  | -0.72554900 | 1.39215900  |
| C  | 4.63522700  | 0.80979800  | -0.44709900 |
| C  | 5.32548700  | -1.59176700 | 0.79053100  |
| H  | 3.99033300  | -1.01456900 | 2.35019800  |
| C  | 5.54891100  | -0.03790500 | -1.06083500 |
| H  | 4.33606500  | 1.72575800  | -0.94669200 |
| C  | 5.88339000  | -1.23459200 | -0.42940100 |
| H  | 5.59833300  | -2.52413100 | 1.27195500  |
| H  | 5.98802900  | 0.22347300  | -2.01690500 |
| Br | 7.16943300  | -2.43916800 | -1.28292300 |

|   |            |            |             |
|---|------------|------------|-------------|
| O | 1.50495400 | 1.83266500 | -1.11238900 |
| C | 1.39007200 | 3.22020100 | -1.31328200 |
| C | 1.46509800 | 3.52822400 | -2.80720900 |
| H | 2.20558400 | 3.75833900 | -0.79625000 |
| H | 0.44095000 | 3.61295600 | -0.90833200 |
| H | 1.37638200 | 4.60578800 | -2.99333200 |
| H | 2.41634500 | 3.17504000 | -3.22006500 |
| H | 0.65770000 | 3.01434200 | -3.34137700 |

**im6a**

SCF Energy (a.u.) = -2101.559003

Thermal correction to Gibbs free energy (a.u.) = 0.696164

Charge = 0, Multiplicity = 1

|   |              |             |             |
|---|--------------|-------------|-------------|
| C | -5.00768600  | -1.53219100 | -0.66529000 |
| C | -6.10565900  | -2.26329200 | -0.19624500 |
| C | -7.39378700  | -1.98635700 | -0.63084000 |
| C | -7.63563100  | -0.95974700 | -1.55712900 |
| C | -6.53310000  | -0.23302500 | -2.02615300 |
| C | -5.24332500  | -0.51287500 | -1.58864900 |
| H | -5.94477500  | -3.06355300 | 0.51963900  |
| H | -8.21864100  | -2.57568600 | -0.24865900 |
| H | -6.69318200  | 0.56667600  | -2.74160000 |
| H | -4.41148000  | 0.07870400  | -1.95353200 |
| C | -8.97730000  | -0.62037700 | -2.04953200 |
| C | -10.13497400 | -1.19991000 | -1.71812100 |
| H | -9.00152700  | 0.19985600  | -2.76342700 |
| H | -11.06897700 | -0.86107600 | -2.14901500 |
| H | -10.19726000 | -2.02326000 | -1.01558600 |
| C | -3.35892900  | -1.02823200 | 1.18710600  |
| C | -3.62356900  | -1.79341900 | -0.13334600 |
| H | -3.48387000  | -2.86361300 | 0.04746300  |
| H | -2.88469700  | -1.49165000 | -0.87653300 |
| H | -4.13441800  | -1.32900600 | 1.89901000  |
| C | -2.01493800  | -1.34047400 | 1.81453500  |

|    |             |             |             |
|----|-------------|-------------|-------------|
| C  | -1.83413200 | -1.06609200 | 3.18848000  |
| C  | -0.93102300 | -1.80290200 | 1.08674400  |
| C  | -0.59745400 | -1.17676200 | 3.78645100  |
| H  | -2.68262700 | -0.72258000 | 3.77029000  |
| C  | 0.34384000  | -1.91757700 | 1.67948200  |
| H  | -1.02776200 | -2.05644200 | 0.04088400  |
| C  | 0.53445600  | -1.57257600 | 3.03539000  |
| H  | -0.47401700 | -0.93192500 | 4.83543900  |
| H  | 1.14881300  | -2.34619000 | 1.09797800  |
| C  | -3.81649100 | 3.21556200  | 0.48576800  |
| C  | -4.78912200 | 2.51353500  | 1.19343700  |
| C  | -4.62869500 | 1.15015600  | 1.43368800  |
| C  | -3.49619700 | 0.47444600  | 0.97789000  |
| C  | -2.52084400 | 1.18890400  | 0.27681100  |
| C  | -2.68190600 | 2.54756000  | 0.02669600  |
| H  | -3.94098500 | 4.27515200  | 0.29358300  |
| H  | -5.67655400 | 3.02257800  | 1.55196500  |
| H  | -5.39944400 | 0.60135600  | 1.96393800  |
| H  | -1.62852500 | 0.69248800  | -0.08373500 |
| H  | -1.91669700 | 3.07289900  | -0.52833500 |
| Ni | 1.06498600  | 0.13133700  | 1.83653700  |
| C  | 2.63995600  | -0.46800500 | 2.75246000  |
| C  | 1.94287600  | -1.52864300 | 3.61066200  |
| H  | 1.90176900  | -1.21429500 | 4.65445000  |
| H  | 2.42730100  | -2.50838200 | 3.58510800  |
| H  | 2.98565500  | 0.39943200  | 3.31321000  |
| C  | 3.60558100  | -0.87556000 | 1.70479600  |
| C  | 3.81696000  | -2.20646200 | 1.31502300  |
| C  | 4.31996900  | 0.12326300  | 1.02011200  |
| C  | 4.68948500  | -2.53237200 | 0.27893800  |
| H  | 3.29854900  | -3.01451900 | 1.81507400  |
| C  | 5.18914000  | -0.18179900 | -0.01553800 |
| H  | 4.14079600  | 1.15865200  | 1.28035600  |
| C  | 5.35916300  | -1.51305300 | -0.38075200 |

|    |             |             |             |
|----|-------------|-------------|-------------|
| H  | 4.83732200  | -3.56441800 | -0.01050500 |
| H  | 5.70574900  | 0.60369600  | -0.54996000 |
| Br | 6.53996800  | -1.95037200 | -1.85816500 |
| O  | 1.43185600  | 1.84395100  | 1.45210100  |
| C  | 1.34514600  | 2.82113000  | 2.45815100  |
| C  | -0.03487200 | 2.90910200  | 3.10804300  |
| H  | 1.59159900  | 3.79526600  | 2.00504300  |
| H  | 2.10765600  | 2.65243700  | 3.23823400  |
| H  | -0.07702000 | 3.72372900  | 3.83936500  |
| H  | -0.80393400 | 3.07799500  | 2.34992900  |
| H  | -0.27555900 | 1.97328200  | 3.62231600  |
| C  | 0.12297700  | -2.87951600 | -2.34997300 |
| C  | 1.38073800  | -2.58795300 | -1.82128700 |
| C  | 1.74601600  | -1.26566400 | -1.58349600 |
| C  | 0.85759400  | -0.21279500 | -1.84564700 |
| C  | -0.40523600 | -0.52446300 | -2.37057500 |
| C  | -0.76829000 | -1.84347700 | -2.63280300 |
| H  | -0.15968000 | -3.90759600 | -2.54784600 |
| H  | 2.07999900  | -3.38859100 | -1.60677200 |
| H  | 2.72825000  | -1.03827400 | -1.19098200 |
| H  | -1.10101700 | 0.28006600  | -2.58086800 |
| H  | -1.74143400 | -2.06769500 | -3.05572800 |
| C  | 3.03656800  | 2.84376500  | -1.05354500 |
| C  | 0.68495300  | 3.57455700  | -1.22002200 |
| C  | 2.11934900  | 3.92790300  | -1.63389000 |
| H  | 3.03647100  | 2.89591100  | 0.03717200  |
| H  | -0.02825000 | 4.23989500  | -1.71496600 |
| B  | 1.28732400  | 1.26487800  | -1.57403200 |
| O  | 2.61522000  | 1.52842400  | -1.41777400 |
| O  | 0.32400600  | 2.23626700  | -1.57520700 |
| H  | 4.05741400  | 2.96680900  | -1.42574200 |
| H  | 0.57033300  | 3.67112400  | -0.13798000 |
| C  | 2.49564900  | 5.28401000  | -1.02888700 |
| H  | 2.41615800  | 5.26933800  | 0.06161300  |

|   |            |            |             |
|---|------------|------------|-------------|
| H | 3.52313300 | 5.55349900 | -1.29014200 |
| H | 1.84028100 | 6.07437600 | -1.40657000 |
| C | 2.24096500 | 3.97510700 | -3.16438000 |
| H | 1.57707600 | 4.73843700 | -3.58034100 |
| H | 3.26521800 | 4.21829300 | -3.46075200 |
| H | 1.97969500 | 3.01831000 | -3.61988800 |

### TS3a

SCF Energy (a.u.) = -2101.554274

Thermal correction to Gibbs free energy (a.u.) = 0.704984

Charge = 0, Multiplicity = 1

|   |              |             |             |
|---|--------------|-------------|-------------|
| C | -5.15593800  | -1.04872000 | -1.24214700 |
| C | -6.32595200  | -1.81646200 | -1.15814100 |
| C | -7.57098400  | -1.26535200 | -1.43671400 |
| C | -7.69409900  | 0.08408600  | -1.81248500 |
| C | -6.51898300  | 0.84816700  | -1.89608600 |
| C | -5.27333800  | 0.29388100  | -1.61608700 |
| H | -6.25568000  | -2.86345600 | -0.87060500 |
| H | -8.45641100  | -1.88958000 | -1.36435400 |
| H | -6.58769500  | 1.89489400  | -2.18206500 |
| H | -4.38199500  | 0.91275400  | -1.66814600 |
| C | -8.98314400  | 0.72036500  | -2.11776100 |
| C | -10.19555900 | 0.15254700  | -2.10035500 |
| H | -8.91336200  | 1.77467700  | -2.38515000 |
| H | -11.08407500 | 0.72602800  | -2.34496200 |
| H | -10.35227400 | -0.89225100 | -1.84661100 |
| C | -3.54093500  | -1.53375600 | 0.65032500  |
| C | -3.81795600  | -1.63479300 | -0.87173700 |
| H | -3.76991800  | -2.69009900 | -1.16837400 |
| H | -3.02477400  | -1.10792900 | -1.41002200 |
| H | -4.35685700  | -2.05529200 | 1.16767300  |
| C | -2.22962300  | -2.17058300 | 1.07441200  |
| C | -2.01191400  | -2.39194300 | 2.45534600  |
| C | -1.19071400  | -2.43446900 | 0.19061300  |

|    |             |             |             |
|----|-------------|-------------|-------------|
| C  | -0.76877100 | -2.74853200 | 2.93748700  |
| H  | -2.82911300 | -2.21381600 | 3.14907400  |
| C  | 0.08903900  | -2.80696500 | 0.66494700  |
| H  | -1.31600400 | -2.30048400 | -0.87627500 |
| C  | 0.32781900  | -2.91637800 | 2.05508600  |
| H  | -0.60722300 | -2.86505900 | 4.00567600  |
| H  | 0.86437000  | -3.05462100 | -0.05265400 |
| C  | -3.61829100 | 2.63282500  | 1.84093800  |
| C  | -4.71544800 | 1.80970400  | 2.10226200  |
| C  | -4.68628800 | 0.46241200  | 1.73655000  |
| C  | -3.56032100 | -0.07800700 | 1.10870600  |
| C  | -2.46457100 | 0.75515300  | 0.85668100  |
| C  | -2.48804000 | 2.10244100  | 1.21377900  |
| H  | -3.64435400 | 3.68120900  | 2.12564200  |
| H  | -5.59917900 | 2.21596500  | 2.58673600  |
| H  | -5.55126200 | -0.16937800 | 1.92136800  |
| H  | -1.57954000 | 0.35897000  | 0.37436200  |
| H  | -1.61814100 | 2.71456900  | 0.99532800  |
| Ni | 0.83070900  | -0.91138700 | 1.39757700  |
| C  | 2.39332800  | -1.71221300 | 2.18297200  |
| C  | 1.75544300  | -3.05622400 | 2.56475000  |
| H  | 1.75328800  | -3.19639000 | 3.64986300  |
| H  | 2.26488700  | -3.91974000 | 2.12459300  |
| H  | 2.62120600  | -1.08194900 | 3.04568100  |
| C  | 3.45882200  | -1.65547000 | 1.15763400  |
| C  | 3.69650100  | -2.68079400 | 0.22518200  |
| C  | 4.23271400  | -0.48444900 | 1.05106400  |
| C  | 4.65104800  | -2.54305800 | -0.78202200 |
| H  | 3.12568000  | -3.60264000 | 0.26639000  |
| C  | 5.18539700  | -0.32595600 | 0.05204900  |
| H  | 4.04200000  | 0.33512000  | 1.73544500  |
| C  | 5.37999000  | -1.36154800 | -0.85779300 |
| H  | 4.81774700  | -3.34176800 | -1.49593600 |
| H  | 5.74790800  | 0.59633200  | -0.03028900 |

|    |             |             |             |
|----|-------------|-------------|-------------|
| Br | 6.69957700  | -1.14385300 | -2.28469900 |
| O  | 1.06471000  | 0.87442100  | 1.49887900  |
| C  | 1.20787300  | 1.54082000  | 2.73046600  |
| C  | 0.19371700  | 1.09438500  | 3.78114800  |
| H  | 1.07710800  | 2.61475800  | 2.54561400  |
| H  | 2.23348400  | 1.40976400  | 3.12121900  |
| H  | 0.31096800  | 1.67085800  | 4.70801800  |
| H  | -0.82377300 | 1.23594000  | 3.40310900  |
| H  | 0.32144300  | 0.03141000  | 4.01860200  |
| C  | -0.05359000 | -1.24691300 | -3.02151500 |
| C  | 1.21076600  | -1.35996400 | -2.43731700 |
| C  | 1.67220700  | -0.36437800 | -1.57390700 |
| C  | 0.88235800  | 0.75453200  | -1.25756400 |
| C  | -0.38050100 | 0.85352200  | -1.86321900 |
| C  | -0.84668900 | -0.13087200 | -2.73750700 |
| H  | -0.41127000 | -2.01082500 | -3.70759400 |
| H  | 1.84680900  | -2.21150000 | -2.66693300 |
| H  | 2.66786700  | -0.43846600 | -1.15524400 |
| H  | -0.99588200 | 1.72288800  | -1.65170100 |
| H  | -1.82035300 | -0.02245600 | -3.20962900 |
| C  | 3.37128000  | 3.18704600  | 0.32024900  |
| C  | 1.14742300  | 4.25480700  | 0.28843100  |
| C  | 2.61566800  | 4.44950800  | -0.12296900 |
| H  | 3.35483300  | 3.10966100  | 1.41869400  |
| H  | 0.52340900  | 5.04021200  | -0.15640400 |
| B  | 1.43678600  | 1.89959600  | -0.31780200 |
| O  | 2.81840700  | 2.01872500  | -0.25514400 |
| O  | 0.61167200  | 3.00548300  | -0.12420500 |
| H  | 4.42119600  | 3.24274700  | 0.00684500  |
| H  | 1.05866900  | 4.34586300  | 1.38068100  |
| C  | 3.18732000  | 5.67558700  | 0.59658600  |
| H  | 3.14528700  | 5.55813100  | 1.68632700  |
| H  | 4.23395800  | 5.83998000  | 0.31462100  |
| H  | 2.62721400  | 6.58086600  | 0.33352000  |

|   |            |            |             |
|---|------------|------------|-------------|
| C | 2.72637800 | 4.62345000 | -1.64582500 |
| H | 2.19473100 | 5.52612000 | -1.96923200 |
| H | 3.77563900 | 4.72122500 | -1.94839100 |
| H | 2.30145600 | 3.76878300 | -2.17852500 |

**im7a**

SCF Energy (a.u.) = -2101.556368

Thermal correction to Gibbs free energy (a.u.) = 0.698647

Charge = 0, Multiplicity = 1

|   |              |             |             |
|---|--------------|-------------|-------------|
| C | -5.09900700  | -0.99815500 | -1.35995000 |
| C | -6.25098800  | -1.79336200 | -1.35266800 |
| C | -7.50462600  | -1.24573100 | -1.58392400 |
| C | -7.65512800  | 0.12751900  | -1.83306600 |
| C | -6.49820000  | 0.91818100  | -1.84373600 |
| C | -5.24340500  | 0.36659000  | -1.61115600 |
| H | -6.16112800  | -2.85878100 | -1.16372500 |
| H | -8.37390900  | -1.89225400 | -1.57344300 |
| H | -6.58737600  | 1.98281600  | -2.03211000 |
| H | -4.36765900  | 1.00554500  | -1.60433400 |
| C | -8.95667500  | 0.76193300  | -2.08071000 |
| C | -10.15513000 | 0.17154700  | -2.11243800 |
| H | -8.90968300  | 1.83454000  | -2.25464800 |
| H | -11.05237100 | 0.74640000  | -2.30565400 |
| H | -10.28802000 | -0.89221500 | -1.95084500 |
| C | -3.50705800  | -1.66390900 | 0.49323400  |
| C | -3.75206500  | -1.58620900 | -1.03356000 |
| H | -3.66928600  | -2.59268700 | -1.45577200 |
| H | -2.96879900  | -0.97636200 | -1.48643600 |
| H | -4.29719700  | -2.28907000 | 0.92345500  |
| C | -2.17216300  | -2.28093300 | 0.86657800  |
| C | -1.94699800  | -2.58450200 | 2.22967800  |
| C | -1.13304800  | -2.46457400 | -0.03141500 |
| C | -0.69881700  | -2.93708700 | 2.68796000  |
| H | -2.76620400  | -2.47364400 | 2.93133500  |

|    |             |             |             |
|----|-------------|-------------|-------------|
| C  | 0.15491700  | -2.84081700 | 0.41711000  |
| H  | -1.26416000 | -2.26831800 | -1.08615900 |
| C  | 0.39708800  | -3.02661900 | 1.79680600  |
| H  | -0.53377800 | -3.11644700 | 3.74434300  |
| H  | 0.92773100  | -3.04289300 | -0.31427700 |
| C  | -3.84421300 | 2.30432900  | 2.18593900  |
| C  | -4.90051100 | 1.40245300  | 2.30511200  |
| C  | -4.78830600 | 0.11644000  | 1.77872600  |
| C  | -3.61798600 | -0.28355100 | 1.13244000  |
| C  | -2.56368600 | 0.62570200  | 1.02832900  |
| C  | -2.66983900 | 1.91375900  | 1.54265200  |
| H  | -3.93674900 | 3.30537300  | 2.59183100  |
| H  | -5.81730500 | 1.70109100  | 2.80077500  |
| H  | -5.62251500 | -0.57283000 | 1.85227900  |
| H  | -1.64778900 | 0.33761300  | 0.53228700  |
| H  | -1.82990900 | 2.58937400  | 1.42599500  |
| Ni | 0.88205100  | -0.98350200 | 1.21023000  |
| C  | 2.43537500  | -1.80492700 | 2.02377200  |
| C  | 1.82322700  | -3.18243500 | 2.29770300  |
| H  | 1.82623000  | -3.41085900 | 3.36483300  |
| H  | 2.34498900  | -3.99323200 | 1.78647600  |
| H  | 2.59578900  | -1.21606900 | 2.92626600  |
| C  | 3.53938800  | -1.65644000 | 1.05708200  |
| C  | 3.82001500  | -2.60323900 | 0.05861700  |
| C  | 4.30252800  | -0.47673500 | 1.07242700  |
| C  | 4.80864400  | -2.38154900 | -0.89329500 |
| H  | 3.25478400  | -3.52470700 | 0.00159500  |
| C  | 5.28907400  | -0.23678100 | 0.12762600  |
| H  | 4.08012800  | 0.29016500  | 1.80209700  |
| C  | 5.52810200  | -1.19404400 | -0.85076800 |
| H  | 5.00840600  | -3.11723500 | -1.66093100 |
| H  | 5.84178700  | 0.69239800  | 0.13707500  |
| Br | 6.88297100  | -0.85906600 | -2.19731100 |
| O  | 1.04054200  | 0.84739000  | 1.52644400  |

|   |             |             |             |
|---|-------------|-------------|-------------|
| C | 1.24271900  | 1.43087100  | 2.81210500  |
| C | 0.32369600  | 0.80596900  | 3.84774400  |
| H | 1.03112700  | 2.49800900  | 2.72165800  |
| H | 2.29630800  | 1.32372500  | 3.10055400  |
| H | 0.47073700  | 1.28056600  | 4.82241800  |
| H | -0.71976500 | 0.92944000  | 3.55108000  |
| H | 0.52145900  | -0.26390600 | 3.95643800  |
| C | 0.16979500  | -0.90763000 | -3.14169400 |
| C | 1.42377100  | -1.02184400 | -2.54360600 |
| C | 1.77647200  | -0.17207100 | -1.49493500 |
| C | 0.88783300  | 0.79492900  | -0.99573800 |
| C | -0.35798200 | 0.90557400  | -1.63255600 |
| C | -0.71578900 | 0.07289700  | -2.69154800 |
| H | -0.10485600 | -1.55483200 | -3.96777800 |
| H | 2.13644700  | -1.75510600 | -2.90667700 |
| H | 2.77230500  | -0.22925000 | -1.07893400 |
| H | -1.04143700 | 1.67682500  | -1.29741300 |
| H | -1.67830000 | 0.19434200  | -3.17812000 |
| C | 3.16050600  | 3.39523800  | 0.46792300  |
| C | 0.84658000  | 4.21421400  | 0.51984700  |
| C | 2.22289900  | 4.46330500  | -0.11190400 |
| H | 3.26052600  | 3.56530200  | 1.55359500  |
| H | 0.10027200  | 4.87947600  | 0.06877600  |
| B | 1.30296100  | 1.77415000  | 0.23105600  |
| O | 2.70997100  | 2.08609400  | 0.20693200  |
| O | 0.39068800  | 2.88686900  | 0.36120000  |
| H | 4.16106300  | 3.49577000  | 0.03034100  |
| H | 0.90279500  | 4.47036900  | 1.59116600  |
| C | 2.72049900  | 5.85666200  | 0.28154800  |
| H | 2.80389500  | 5.96112900  | 1.36783700  |
| H | 3.70494800  | 6.05488300  | -0.15290900 |
| H | 2.03733200  | 6.63152500  | -0.07961100 |
| C | 2.14618300  | 4.33536400  | -1.63985000 |
| H | 1.47035500  | 5.08992400  | -2.05384500 |

|   |            |            |             |
|---|------------|------------|-------------|
| H | 3.13372600 | 4.48156500 | -2.08786900 |
| H | 1.78304300 | 3.35232200 | -1.94010300 |

#### TS4a

SCF Energy (a.u.) = -2101.551689

Thermal correction to Gibbs free energy (a.u.) = 0.705920

Charge = 0, Multiplicity = 1

|   |              |             |             |
|---|--------------|-------------|-------------|
| C | -5.22595100  | 0.19571100  | -1.47254800 |
| C | -6.29905800  | -0.34406800 | -2.19585100 |
| C | -7.60118900  | 0.09559700  | -1.99085000 |
| C | -7.88301300  | 1.10035600  | -1.04829600 |
| C | -6.80485500  | 1.64018800  | -0.32899200 |
| C | -5.50185300  | 1.19711600  | -0.53650800 |
| H | -6.10606300  | -1.12271700 | -2.93081900 |
| H | -8.40769700  | -0.34433100 | -2.56966300 |
| H | -6.99643400  | 2.41728800  | 0.40710200  |
| H | -4.68939200  | 1.61711700  | 0.04990100  |
| C | -9.23904100  | 1.60296100  | -0.78807300 |
| C | -10.37754100 | 1.21921400  | -1.37920000 |
| H | -9.29386900  | 2.37546100  | -0.02100900 |
| H | -11.32806200 | 1.66406900  | -1.10198200 |
| H | -10.41048900 | 0.45753000  | -2.15334500 |
| C | -3.58299700  | -1.62963200 | -0.82368000 |
| C | -3.82925800  | -0.34103500 | -1.65289800 |
| H | -3.65115900  | -0.56333500 | -2.71172500 |
| H | -3.09402300  | 0.41176100  | -1.35079700 |
| H | -4.28763200  | -2.38591300 | -1.19709700 |
| C | -2.17042100  | -2.18540300 | -0.97870900 |
| C | -1.79158500  | -3.29665800 | -0.21166200 |
| C | -1.21939100  | -1.63102500 | -1.83829600 |
| C | -0.49895000  | -3.80832200 | -0.27297600 |
| H | -2.51675400  | -3.74625300 | 0.46165400  |
| C | 0.07494400   | -2.14546000 | -1.90123800 |
| H | -1.46426900  | -0.76825500 | -2.44536800 |

|    |             |             |             |
|----|-------------|-------------|-------------|
| C  | 0.46347900  | -3.22279400 | -1.10310900 |
| H  | -0.22688500 | -4.66211400 | 0.34449300  |
| H  | 0.80065800  | -1.67698700 | -2.56276800 |
| C  | -4.60436000 | -0.81358400 | 3.30431400  |
| C  | -5.44623800 | -1.59876300 | 2.51784300  |
| C  | -5.10523600 | -1.87880500 | 1.19256100  |
| C  | -3.92397700 | -1.38127500 | 0.63795600  |
| C  | -3.08210800 | -0.59171200 | 1.43306200  |
| C  | -3.42119700 | -0.31040700 | 2.75556000  |
| H  | -4.86631500 | -0.59366600 | 4.33558700  |
| H  | -6.37102100 | -1.99156100 | 2.93149000  |
| H  | -5.77288900 | -2.47583500 | 0.57668000  |
| H  | -2.16623800 | -0.19897800 | 1.00292900  |
| H  | -2.75973200 | 0.30185400  | 3.36367900  |
| Ni | 2.29181200  | -0.97007400 | 0.04966600  |
| C  | 2.67524100  | -2.94092400 | 0.07278200  |
| C  | 1.91454900  | -3.65169800 | -1.04515000 |
| H  | 1.97868500  | -4.73676200 | -0.88439500 |
| H  | 2.39516100  | -3.45361000 | -2.00959500 |
| H  | 2.58314100  | -3.41815300 | 1.04863900  |
| C  | 3.88739800  | -2.20996700 | -0.14380500 |
| C  | 3.93100700  | -1.31434100 | -1.26333100 |
| C  | 4.89839800  | -2.04987600 | 0.86419300  |
| C  | 4.99279100  | -0.37735900 | -1.40213500 |
| H  | 3.30541200  | -1.49351500 | -2.13341100 |
| C  | 5.90552900  | -1.12876500 | 0.72550600  |
| H  | 4.86845500  | -2.69640100 | 1.73661100  |
| C  | 5.94000400  | -0.29670000 | -0.42025300 |
| H  | 5.01952000  | 0.27670700  | -2.26488500 |
| H  | 6.67403400  | -1.03281600 | 1.48451600  |
| Br | 7.38594700  | 1.00856100  | -0.56649800 |
| O  | 0.69524700  | -0.79612600 | 1.05004600  |
| C  | 0.43513500  | -1.44356500 | 2.30787300  |
| C  | 1.57636900  | -1.28542100 | 3.29954700  |

|   |             |             |             |
|---|-------------|-------------|-------------|
| H | 0.25686500  | -2.49208500 | 2.05993400  |
| H | -0.49427400 | -1.02709700 | 2.70548900  |
| H | 1.34853100  | -1.83432100 | 4.22143500  |
| H | 2.50808600  | -1.68420200 | 2.88322200  |
| H | 1.72539200  | -0.23059200 | 3.54057400  |
| C | 3.75448400  | 3.15886400  | -1.34680000 |
| C | 4.00692800  | 2.74838800  | -0.03444200 |
| C | 3.26532100  | 1.70467200  | 0.51858700  |
| C | 2.25947700  | 1.03718700  | -0.20964000 |
| C | 2.01748400  | 1.48871200  | -1.52283200 |
| C | 2.75081200  | 2.53237900  | -2.09123900 |
| H | 4.33121300  | 3.97013800  | -1.78314900 |
| H | 4.78326600  | 3.23815600  | 0.54692000  |
| H | 3.46507300  | 1.40123400  | 1.54388700  |
| H | 1.23210400  | 1.00950800  | -2.10419800 |
| H | 2.54358700  | 2.85941400  | -3.10759900 |
| C | -0.44400300 | 2.35885000  | 2.20281500  |
| C | -0.93659100 | 2.26285400  | -0.24862400 |
| C | -0.69109200 | 3.21793000  | 0.95370300  |
| H | -1.37281700 | 1.83509000  | 2.47323100  |
| H | -0.43437400 | 2.65728400  | -1.14233400 |
| B | 0.51096300  | 0.63274800  | 0.86296900  |
| O | 0.60407100  | 1.41385900  | 2.02319200  |
| O | -0.51498800 | 0.92071600  | -0.04312600 |
| H | -0.16344600 | 2.99794800  | 3.04705400  |
| H | -2.00906500 | 2.20636600  | -0.46933900 |
| C | -1.94366300 | 4.07740700  | 1.18129300  |
| H | -2.81841300 | 3.45477200  | 1.40630600  |
| H | -1.79807900 | 4.77461500  | 2.01500600  |
| H | -2.17414300 | 4.67201400  | 0.28942200  |
| C | 0.52020600  | 4.12721300  | 0.69387800  |
| H | 0.36018700  | 4.73506900  | -0.20431900 |
| H | 0.67579400  | 4.80978200  | 1.53842100  |
| H | 1.43409200  | 3.54915600  | 0.55262900  |

**im8a**

SCF Energy (a.u.) = -2101.571514

Thermal correction to Gibbs free energy (a.u.) = 0.702894

Charge = 0, Multiplicity = 1

|   |              |             |             |
|---|--------------|-------------|-------------|
| C | -6.01146900  | -0.13894100 | -1.19665700 |
| C | -7.02242300  | -0.95033900 | -1.73177100 |
| C | -8.36209200  | -0.71470700 | -1.44787000 |
| C | -8.74609200  | 0.34911200  | -0.61201100 |
| C | -7.73051200  | 1.15939700  | -0.07990900 |
| C | -6.38922000  | 0.92010300  | -0.36546100 |
| H | -6.75019400  | -1.77934900 | -2.38149100 |
| H | -9.11837400  | -1.36154000 | -1.88197600 |
| H | -8.00091400  | 1.98694800  | 0.57148600  |
| H | -5.62263800  | 1.55072600  | 0.07640700  |
| C | -10.14589100 | 0.64496800  | -0.27649700 |
| C | -11.23788400 | -0.00975400 | -0.69061800 |
| H | -10.27975300 | 1.49929000  | 0.38699600  |
| H | -12.22856600 | 0.30114100  | -0.37432900 |
| H | -11.19239400 | -0.86985200 | -1.35292200 |
| C | -4.00697600  | -1.51433900 | -0.46581000 |
| C | -4.55962600  | -0.45140400 | -1.45392300 |
| H | -4.42698100  | -0.82399400 | -2.47664700 |
| H | -3.96448100  | 0.46427200  | -1.36182100 |
| H | -4.66462200  | -2.38966600 | -0.54465800 |
| C | -2.59020700  | -1.96805200 | -0.78845700 |
| C | -2.10382500  | -3.13830700 | -0.18721600 |
| C | -1.72253600  | -1.24787200 | -1.61374000 |
| C | -0.79608800  | -3.56446100 | -0.39765800 |
| H | -2.76118200  | -3.71190800 | 0.46216100  |
| C | -0.40914000  | -1.67394300 | -1.82021500 |
| H | -2.05472800  | -0.33585300 | -2.09781900 |
| C | 0.07812100   | -2.83028000 | -1.21130100 |
| H | -0.44467100  | -4.47804400 | 0.07755900  |

|    |             |             |             |
|----|-------------|-------------|-------------|
| H  | 0.25265700  | -1.07229900 | -2.43618400 |
| C  | -4.32406000 | 0.06519800  | 3.55681100  |
| C  | -5.28593300 | -0.82440900 | 3.07678800  |
| C  | -5.17532800 | -1.35187100 | 1.78843300  |
| C  | -4.10373900 | -0.99932400 | 0.96347100  |
| C  | -3.14535500 | -0.10651700 | 1.45520400  |
| C  | -3.24927400 | 0.42472800  | 2.73931900  |
| H  | -4.40888500 | 0.47297600  | 4.56021000  |
| H  | -6.12658200 | -1.10844300 | 3.70378900  |
| H  | -5.93676500 | -2.03014900 | 1.41292300  |
| H  | -2.30169400 | 0.16065800  | 0.83014300  |
| H  | -2.48429600 | 1.10797500  | 3.09722800  |
| Ni | 2.57747600  | -0.71506900 | -0.17018400 |
| C  | 2.34877000  | -2.78356000 | -0.14999800 |
| C  | 1.53093200  | -3.23252700 | -1.35135800 |
| H  | 1.59851900  | -4.32713800 | -1.45392700 |
| H  | 1.93756800  | -2.81278200 | -2.27724300 |
| H  | 2.03755400  | -3.25573200 | 0.78283600  |
| C  | 3.71179600  | -2.38603200 | -0.19326300 |
| C  | 4.14963800  | -1.50692200 | -1.24922300 |
| C  | 4.57816200  | -2.49561100 | 0.95667600  |
| C  | 5.44377900  | -0.90040500 | -1.19885400 |
| H  | 3.65419900  | -1.52574300 | -2.21708300 |
| C  | 5.79462800  | -1.87026500 | 1.00369600  |
| H  | 4.25438300  | -3.11799700 | 1.78659800  |
| C  | 6.22112100  | -1.07523100 | -0.09377100 |
| H  | 5.77194900  | -0.28232900 | -2.02560800 |
| H  | 6.43832800  | -1.98013300 | 1.86963800  |
| Br | 7.96327000  | -0.19625000 | 0.02786300  |
| O  | 0.86542000  | -0.19863500 | 0.72088400  |
| C  | 0.54953200  | -0.84398700 | 1.98197000  |
| C  | 1.64216400  | -0.59189700 | 3.00323700  |
| H  | 0.44283100  | -1.90289000 | 1.74450600  |
| H  | -0.41286000 | -0.46411700 | 2.32599900  |

|   |             |             |             |
|---|-------------|-------------|-------------|
| H | 1.39991200  | -1.10693800 | 3.94018200  |
| H | 2.60722900  | -0.96301100 | 2.64192100  |
| H | 1.73736800  | 0.47891900  | 3.20681200  |
| C | 4.41905600  | 3.65548900  | -0.57036800 |
| C | 4.43721100  | 2.97087900  | 0.64489000  |
| C | 3.85945500  | 1.69876100  | 0.74332300  |
| C | 3.24524400  | 1.07349100  | -0.35590300 |
| C | 3.23678500  | 1.79093100  | -1.56680500 |
| C | 3.81232100  | 3.05879700  | -1.67956100 |
| H | 4.87262300  | 4.63971100  | -0.65434000 |
| H | 4.90582900  | 3.42284400  | 1.51665800  |
| H | 3.90463100  | 1.18228600  | 1.70111700  |
| H | 2.76981200  | 1.35021400  | -2.44679400 |
| H | 3.79392200  | 3.58120500  | -2.63446400 |
| C | -1.12637800 | 2.87144200  | 0.93300500  |
| C | -0.28170500 | 2.58263000  | -1.37608000 |
| C | -0.43788300 | 3.59588400  | -0.23032200 |
| H | -2.14431700 | 2.56566300  | 0.65633800  |
| H | 0.41104000  | 2.96586200  | -2.13180600 |
| B | 0.22953200  | 0.98451800  | 0.36375300  |
| O | -0.39736300 | 1.70596000  | 1.34003500  |
| O | 0.23052900  | 1.31953500  | -0.94840900 |
| H | -1.19464700 | 3.52271600  | 1.80947400  |
| H | -1.25199900 | 2.39937100  | -1.85703100 |
| C | -1.33126100 | 4.74935700  | -0.70404700 |
| H | -2.32906200 | 4.39763700  | -0.99314500 |
| H | -1.45057400 | 5.49755500  | 0.08766500  |
| H | -0.88534900 | 5.25245100  | -1.56948700 |
| C | 0.93253800  | 4.13092400  | 0.21457700  |
| H | 1.42108800  | 4.66547900  | -0.60517500 |
| H | 0.81436900  | 4.82567200  | 1.05459400  |
| H | 1.61243800  | 3.33475800  | 0.52539800  |

**im9a**

SCF Energy (a.u.) = -1887.137864

Thermal correction to Gibbs free energy (a.u.) = 0.665694

Charge = 0, Multiplicity = 1

|   |             |             |             |
|---|-------------|-------------|-------------|
| C | 6.51413000  | -1.38408100 | 0.79577300  |
| C | 7.15963300  | -2.39718200 | 0.07122000  |
| C | 8.49253000  | -2.28078500 | -0.30218600 |
| C | 9.23893400  | -1.13781500 | 0.03590100  |
| C | 8.58953700  | -0.12724300 | 0.76217900  |
| C | 7.25316500  | -0.24676400 | 1.13526400  |
| H | 6.60408400  | -3.29251800 | -0.19966100 |
| H | 8.96023100  | -3.08721200 | -0.85869200 |
| H | 9.14485000  | 0.76623300  | 1.03721200  |
| H | 6.77571700  | 0.55696500  | 1.68787500  |
| C | 10.65072600 | -0.96006100 | -0.33123200 |
| C | 11.42805500 | -1.81266900 | -1.01045500 |
| H | 11.08789600 | -0.01815500 | -0.00013500 |
| H | 12.46447800 | -1.57266700 | -1.22575000 |
| H | 11.07096000 | -2.77195800 | -1.37474800 |
| C | 4.14914700  | -1.03437400 | -0.04257300 |
| C | 5.04817700  | -1.50556000 | 1.13106000  |
| H | 4.79420500  | -2.54888000 | 1.35011900  |
| H | 4.81875500  | -0.93045600 | 2.03426300  |
| H | 4.47763200  | -1.59421200 | -0.92607300 |
| C | 2.67810400  | -1.36036600 | 0.16823100  |
| C | 1.95014800  | -1.98558000 | -0.85168700 |
| C | 1.99720600  | -1.02546300 | 1.34416000  |
| C | 0.58463300  | -2.23049600 | -0.71699300 |
| H | 2.46101900  | -2.27779800 | -1.76634100 |
| C | 0.62832600  | -1.26035600 | 1.47189000  |
| H | 2.53140400  | -0.56714500 | 2.17123000  |
| C | -0.10947000 | -1.84534400 | 0.43736700  |
| H | 0.04291900  | -2.71278100 | -1.52764500 |
| H | 0.12187000  | -0.97967100 | 2.39027500  |
| C | 4.61587300  | 3.16974400  | -1.02223400 |

|    |             |             |             |
|----|-------------|-------------|-------------|
| C  | 4.74679200  | 2.19164200  | -2.00804100 |
| C  | 4.60986600  | 0.84215900  | -1.67766100 |
| C  | 4.33569200  | 0.44337100  | -0.36511100 |
| C  | 4.20924500  | 1.43589400  | 0.61609200  |
| C  | 4.35016000  | 2.78503300  | 0.29370900  |
| H  | 4.72526700  | 4.22062500  | -1.27399900 |
| H  | 4.96020800  | 2.47618500  | -3.03455800 |
| H  | 4.71890400  | 0.08451200  | -2.44936600 |
| H  | 3.99615400  | 1.15812800  | 1.64351700  |
| H  | 4.25188500  | 3.53697300  | 1.07198700  |
| Ni | -1.84782300 | 0.88004200  | 0.06720300  |
| C  | -2.31464300 | -0.97748800 | -0.40068700 |
| C  | -1.60981600 | -1.99144300 | 0.51719200  |
| H  | -1.89689100 | -3.01323200 | 0.22038800  |
| H  | -1.93412600 | -1.86170600 | 1.55335100  |
| H  | -1.85108300 | -1.05072700 | -1.39353800 |
| C  | -3.78328100 | -1.17597100 | -0.55745100 |
| C  | -4.58041100 | -1.76790400 | 0.43641100  |
| C  | -4.43564100 | -0.71742400 | -1.71580900 |
| C  | -5.96279400 | -1.88120200 | 0.29771800  |
| H  | -4.12386100 | -2.11624600 | 1.35595700  |
| C  | -5.81655200 | -0.81387800 | -1.87564000 |
| H  | -3.84876800 | -0.26562000 | -2.51212000 |
| C  | -6.56359000 | -1.39522500 | -0.85663500 |
| H  | -6.55877800 | -2.32895900 | 1.08491400  |
| H  | -6.29737700 | -0.44959000 | -2.77677300 |
| Br | -8.51185900 | -1.53300500 | -1.05727000 |
| C  | -4.76332600 | 0.87666900  | 3.76759500  |
| C  | -5.19600300 | 1.25404400  | 2.49399500  |
| C  | -4.31785100 | 1.20285400  | 1.40970900  |
| C  | -2.98436400 | 0.78546900  | 1.56472500  |
| C  | -2.56597300 | 0.42477200  | 2.85372100  |
| C  | -3.44361600 | 0.46143400  | 3.94363000  |
| H  | -5.44795600 | 0.90414000  | 4.61109400  |

|   |             |            |             |
|---|-------------|------------|-------------|
| H | -6.22410800 | 1.57329500 | 2.33961400  |
| H | -4.69366700 | 1.45568900 | 0.42043000  |
| H | -1.54005100 | 0.10671000 | 3.02404400  |
| H | -3.09164600 | 0.16564500 | 4.92969000  |
| C | -1.65025100 | 3.24914100 | 0.29006400  |
| C | -0.64080500 | 2.63599100 | 0.96837200  |
| C | 0.77623900  | 2.39164100 | 0.50904000  |
| C | 0.95492800  | 2.11551400 | -1.00135300 |
| C | -0.08315200 | 1.17367400 | -1.56773200 |
| C | -1.28677300 | 1.51014800 | -2.10441700 |
| C | -1.91715100 | 2.87880900 | -2.22115700 |
| C | -1.56361500 | 3.86880100 | -1.08723000 |
| H | -2.59007600 | 3.38393600 | 0.82035100  |
| H | -0.84301100 | 2.36981400 | 2.00352000  |
| H | 1.15862600  | 1.52711500 | 1.05927300  |
| H | 1.41639300  | 3.23837900 | 0.79558200  |
| H | 0.96220100  | 3.05249700 | -1.56300600 |
| H | 1.94136600  | 1.66748500 | -1.14218700 |
| H | 0.21461000  | 0.13020600 | -1.62470000 |
| H | -1.83965300 | 0.72123300 | -2.60843200 |
| H | -3.00477600 | 2.73644900 | -2.23570500 |
| H | -1.65832100 | 3.32835700 | -3.19168900 |
| H | -0.57022900 | 4.29225300 | -1.25053900 |
| H | -2.26618200 | 4.70792400 | -1.13867800 |

### TS5a

SCF Energy (a.u.) = -1887.110945

Thermal correction to Gibbs free energy (a.u.) = 0.662516

Charge = 0, Multiplicity = 1

|   |            |             |             |
|---|------------|-------------|-------------|
| C | 6.43432700 | -1.56396000 | 0.60671100  |
| C | 7.11318700 | -2.47695800 | -0.21313300 |
| C | 8.41733800 | -2.24050700 | -0.63055600 |
| C | 9.09789000 | -1.07271300 | -0.24283700 |
| C | 8.41391100 | -0.16159500 | 0.57778800  |

|   |             |             |             |
|---|-------------|-------------|-------------|
| C | 7.10737500  | -0.40087500 | 0.99473100  |
| H | 6.60776800  | -3.38832900 | -0.52541800 |
| H | 8.91358400  | -2.97161100 | -1.26146500 |
| H | 8.91776700  | 0.74973500  | 0.89066400  |
| H | 6.59763700  | 0.32916500  | 1.61688100  |
| C | 10.47605100 | -0.76973100 | -0.65337300 |
| C | 11.27874400 | -1.51594800 | -1.42243900 |
| H | 10.86190200 | 0.17649300  | -0.27421100 |
| H | 12.28531100 | -1.18787000 | -1.66191200 |
| H | 10.97248500 | -2.47149600 | -1.83915200 |
| C | 4.01883300  | -1.23456000 | -0.07150900 |
| C | 4.99552200  | -1.80180100 | 0.99157800  |
| H | 4.80364800  | -2.87567200 | 1.10189600  |
| H | 4.79006400  | -1.33480600 | 1.96092500  |
| H | 4.32349100  | -1.65640600 | -1.03727500 |
| C | 2.56458300  | -1.60921200 | 0.15650200  |
| C | 1.69412700  | -1.62918300 | -0.94143800 |
| C | 2.02157100  | -1.84323300 | 1.42248600  |
| C | 0.32429800  | -1.79380500 | -0.77160700 |
| H | 2.09861500  | -1.48089300 | -1.94020000 |
| C | 0.64564000  | -2.01738600 | 1.58934600  |
| H | 2.66528700  | -1.87584500 | 2.29598100  |
| C | -0.23412900 | -1.95037600 | 0.50541100  |
| H | -0.32236900 | -1.78664200 | -1.64530400 |
| H | 0.24855300  | -2.19038200 | 2.58593700  |
| C | 4.44666400  | 3.07230000  | -0.34966500 |
| C | 4.91066400  | 2.25221300  | -1.37846400 |
| C | 4.76516400  | 0.86628100  | -1.28942200 |
| C | 4.15205600  | 0.28056900  | -0.17878600 |
| C | 3.68521700  | 1.11329400  | 0.84673700  |
| C | 3.83379900  | 2.49651800  | 0.76652400  |
| H | 4.55996700  | 4.15068300  | -0.41541600 |
| H | 5.39174600  | 2.68859100  | -2.24942700 |
| H | 5.14425000  | 0.22980600  | -2.08459000 |

|    |             |             |             |
|----|-------------|-------------|-------------|
| H  | 3.18844100  | 0.67547000  | 1.70784100  |
| H  | 3.45992600  | 3.12601900  | 1.56912100  |
| Ni | -1.77784800 | 1.15679100  | -0.11023800 |
| C  | -2.47984800 | -0.84180000 | 0.05346200  |
| C  | -1.73411600 | -2.03341300 | 0.68928000  |
| H  | -2.10716200 | -2.94814600 | 0.20533100  |
| H  | -1.96770200 | -2.12933200 | 1.75422500  |
| H  | -1.98316300 | -0.65328800 | -0.91204700 |
| C  | -3.92331500 | -1.07714700 | -0.21295800 |
| C  | -4.76781800 | -1.61886900 | 0.77000000  |
| C  | -4.49181500 | -0.74361500 | -1.45251000 |
| C  | -6.12670500 | -1.82162300 | 0.53050400  |
| H  | -4.36101100 | -1.87042500 | 1.74385800  |
| C  | -5.84801000 | -0.93293300 | -1.71260300 |
| H  | -3.85867500 | -0.33203600 | -2.23410300 |
| C  | -6.64837100 | -1.47096100 | -0.70941000 |
| H  | -6.76610700 | -2.23765200 | 1.30090400  |
| H  | -6.26840100 | -0.67444200 | -2.67792900 |
| Br | -8.55833100 | -1.74301600 | -1.05633400 |
| C  | -3.29988000 | 1.40556100  | 4.06960900  |
| C  | -4.08448000 | 1.62439700  | 2.93774100  |
| C  | -3.66945800 | 1.15666800  | 1.68752900  |
| C  | -2.41179700 | 0.52741500  | 1.52560000  |
| C  | -1.64235200 | 0.29280100  | 2.68601300  |
| C  | -2.08227800 | 0.72560200  | 3.93355300  |
| H  | -3.63554400 | 1.74110700  | 5.04656100  |
| H  | -5.04373600 | 2.12881100  | 3.02724900  |
| H  | -4.33040800 | 1.27413100  | 0.83354500  |
| H  | -0.67089700 | -0.17777000 | 2.59853700  |
| H  | -1.46105900 | 0.54795100  | 4.80885700  |
| C  | -0.74317900 | 2.92032500  | 0.52466000  |
| C  | 0.16507200  | 1.96246200  | 0.12964800  |
| C  | 0.84217300  | 1.87822900  | -1.22022900 |
| C  | -0.06980900 | 2.18671500  | -2.44236300 |

|   |             |            |             |
|---|-------------|------------|-------------|
| C | -1.48672900 | 1.67379500 | -2.30081000 |
| C | -2.53083200 | 2.35374400 | -1.73056900 |
| C | -2.49230500 | 3.75179400 | -1.14505700 |
| C | -1.21522900 | 4.08248800 | -0.32692400 |
| H | -1.01869500 | 2.95127300 | 1.57576500  |
| H | 0.58126900  | 1.30841300 | 0.89348700  |
| H | 1.23846100  | 0.86596100 | -1.32151400 |
| H | 1.71601300  | 2.54412600 | -1.24953900 |
| H | -0.08941500 | 3.26311200 | -2.63427600 |
| H | 0.38690600  | 1.73170800 | -3.32864300 |
| H | -1.71309900 | 0.73594100 | -2.80657500 |
| H | -3.52929300 | 1.93236100 | -1.84822500 |
| H | -3.36332500 | 3.85375900 | -0.48822200 |
| H | -2.61918700 | 4.50017000 | -1.94261800 |
| H | -0.41442500 | 4.41089400 | -0.99520400 |
| H | -1.43862600 | 4.93697700 | 0.32155400  |

**im10a**

SCF Energy (a.u.) = -1887.161801

Thermal correction to Gibbs free energy (a.u.) = 0.665697

Charge = 0, Multiplicity = 1

|   |             |             |             |
|---|-------------|-------------|-------------|
| C | 6.14422600  | -1.86549100 | 0.84294600  |
| C | 6.75469700  | -2.94604600 | 0.18996500  |
| C | 8.08730300  | -2.89386100 | -0.20027700 |
| C | 8.86673400  | -1.75009500 | 0.04761000  |
| C | 8.25104100  | -0.67077300 | 0.70138800  |
| C | 6.91576800  | -0.72559400 | 1.09162900  |
| H | 6.17209900  | -3.84232000 | -0.01213700 |
| H | 8.52810600  | -3.75108600 | -0.69996800 |
| H | 8.83194500  | 0.22582600  | 0.90377800  |
| H | 6.46165800  | 0.13046700  | 1.58223100  |
| C | 10.27923900 | -1.63812900 | -0.34216500 |
| C | 11.02767900 | -2.55885300 | -0.96245100 |
| H | 10.74406900 | -0.68645800 | -0.08478700 |

|    |             |             |             |
|----|-------------|-------------|-------------|
| H  | 12.06794100 | -2.36313600 | -1.20268900 |
| H  | 10.64217200 | -3.53248900 | -1.25218800 |
| C  | 3.79400100  | -1.40648900 | 0.02470100  |
| C  | 4.67844500  | -1.91278000 | 1.19505800  |
| H  | 4.37894400  | -2.93902700 | 1.43825600  |
| H  | 4.49128500  | -1.30151300 | 2.08457200  |
| H  | 4.09356000  | -1.97573100 | -0.86372600 |
| C  | 2.30634200  | -1.63948000 | 0.23187900  |
| C  | 1.48248500  | -1.80632300 | -0.88995000 |
| C  | 1.69949600  | -1.62699900 | 1.49132700  |
| C  | 0.10207100  | -1.91124300 | -0.75985700 |
| H  | 1.93390200  | -1.83115600 | -1.87880200 |
| C  | 0.31270700  | -1.73250800 | 1.62048300  |
| H  | 2.30398300  | -1.52594600 | 2.38723400  |
| C  | -0.51263100 | -1.85088300 | 0.49921900  |
| H  | -0.51289900 | -2.03018800 | -1.64902100 |
| H  | -0.13021900 | -1.71601400 | 2.61255900  |
| C  | 4.62570900  | 2.76985600  | -0.79448200 |
| C  | 5.02672900  | 1.78297900  | -1.69610700 |
| C  | 4.75199100  | 0.44003800  | -1.43096900 |
| C  | 4.07199500  | 0.06308700  | -0.26901700 |
| C  | 3.67578100  | 1.06112300  | 0.62950800  |
| C  | 3.95127300  | 2.40284000  | 0.37249500  |
| H  | 4.83619100  | 3.81593200  | -0.99844000 |
| H  | 5.55565400  | 2.05599700  | -2.60497900 |
| H  | 5.07803200  | -0.32698300 | -2.12847000 |
| H  | 3.12380000  | 0.79063000  | 1.52409500  |
| H  | 3.62421200  | 3.16295300  | 1.07601900  |
| Ni | -1.56119200 | 1.99215200  | -0.20263300 |
| C  | -2.78448100 | -0.70178400 | 0.04231100  |
| C  | -2.01574600 | -1.92712200 | 0.61037800  |
| H  | -2.36641000 | -2.80182400 | 0.04959000  |
| H  | -2.31718100 | -2.09787900 | 1.64915900  |
| H  | -2.38867000 | -0.52181300 | -0.96635400 |

|    |             |             |             |
|----|-------------|-------------|-------------|
| C  | -4.24668500 | -1.10138200 | -0.12139700 |
| C  | -5.12344000 | -1.08778100 | 0.97077900  |
| C  | -4.73022200 | -1.53493900 | -1.35934400 |
| C  | -6.44764700 | -1.50256200 | 0.83748800  |
| H  | -4.77158300 | -0.72892800 | 1.93354600  |
| C  | -6.05425900 | -1.95057200 | -1.51839800 |
| H  | -4.06448400 | -1.54804100 | -2.21935800 |
| C  | -6.89210400 | -1.92936300 | -0.41038700 |
| H  | -7.12059800 | -1.48624200 | 1.68728600  |
| H  | -6.42093300 | -2.27863200 | -2.48442000 |
| Br | -8.75453800 | -2.50610600 | -0.61245000 |
| C  | -3.31957800 | 2.80201900  | 2.53591600  |
| C  | -3.73941500 | 2.81134600  | 1.22373300  |
| C  | -3.44608300 | 1.72777800  | 0.33510700  |
| C  | -2.68004600 | 0.60635600  | 0.84525300  |
| C  | -2.35313600 | 0.59890400  | 2.24027200  |
| C  | -2.63639600 | 1.66990200  | 3.05660100  |
| H  | -3.55338200 | 3.63921100  | 3.18797000  |
| H  | -4.32939300 | 3.64520800  | 0.85041100  |
| H  | -4.07053900 | 1.60235400  | -0.54895200 |
| H  | -1.85749400 | -0.26817700 | 2.66132900  |
| H  | -2.35310900 | 1.64463600  | 4.10524400  |
| C  | 0.26514300  | 2.52113400  | 0.68683300  |
| C  | 0.50075600  | 1.49518200  | -0.19995800 |
| C  | 0.95419200  | 1.62229500  | -1.63470400 |
| C  | 0.31176000  | 2.80795700  | -2.39598400 |
| C  | -1.14292600 | 3.04024200  | -2.02846400 |
| C  | -1.60005200 | 3.92623700  | -1.07939700 |
| C  | -0.75640100 | 4.73281800  | -0.11704200 |
| C  | 0.50342800  | 3.99402400  | 0.41449400  |
| H  | 0.06878500  | 2.25074700  | 1.72379000  |
| H  | 0.52014500  | 0.49201900  | 0.20472300  |
| H  | 0.68339200  | 0.68836900  | -2.14059800 |
| H  | 2.04857600  | 1.69314000  | -1.69520000 |

|   |             |            |             |
|---|-------------|------------|-------------|
| H | 0.88642300  | 3.72199000 | -2.22319100 |
| H | 0.37910200  | 2.61109200 | -3.47246500 |
| H | -1.88170000 | 2.62986000 | -2.71773000 |
| H | -2.65504200 | 4.18861600 | -1.09986300 |
| H | -1.39749600 | 4.98391700 | 0.73641700  |
| H | -0.45167400 | 5.69039000 | -0.56722800 |
| H | 1.33600800  | 4.11002500 | -0.28468200 |
| H | 0.81655800  | 4.48329300 | 1.34435800  |

## P2

SCF Energy (a.u.) = -1404.060869

Thermal correction to Gibbs free energy (a.u.) = 0.492006

Charge = 0, Multiplicity = 1

|   |              |             |             |
|---|--------------|-------------|-------------|
| C | -5.72737100  | -0.91283500 | -0.80636700 |
| C | -6.49670700  | -1.95150700 | -0.26188100 |
| C | -7.83946800  | -1.76967900 | 0.04570100  |
| C | -8.47011300  | -0.53321200 | -0.18100000 |
| C | -7.69617700  | 0.50297300  | -0.72723900 |
| C | -6.35068500  | 0.31811000  | -1.03332200 |
| H | -6.03102000  | -2.91737600 | -0.07790300 |
| H | -8.40525000  | -2.59683200 | 0.46352600  |
| H | -8.15961800  | 1.46948500  | -0.90985400 |
| H | -5.77067000  | 1.14300200  | -1.43743200 |
| C | -9.88546600  | -0.28309500 | 0.12509500  |
| C | -10.77210000 | -1.14533900 | 0.63805600  |
| H | -10.22384800 | 0.72803400  | -0.10105900 |
| H | -11.79870800 | -0.84586600 | 0.82399000  |
| H | -10.51722700 | -2.17106600 | 0.88990800  |
| C | -3.40303700  | -0.84878600 | 0.21104600  |
| C | -4.25450100  | -1.10327400 | -1.06434200 |
| H | -4.05839200  | -2.12438800 | -1.41287700 |
| H | -3.92906900  | -0.42028100 | -1.85630100 |
| H | -3.82399600  | -1.48366900 | 1.00071500  |
| C | -1.94043500  | -1.22518300 | 0.04985800  |

|   |             |             |             |
|---|-------------|-------------|-------------|
| C | -1.19547800 | -1.55869200 | 1.18920800  |
| C | -1.27515500 | -1.17910900 | -1.17886600 |
| C | 0.17251000  | -1.79918100 | 1.10824000  |
| H | -1.69602600 | -1.60771700 | 2.15339200  |
| C | 0.09793200  | -1.41069100 | -1.25787300 |
| H | -1.81986400 | -0.93839100 | -2.08599500 |
| C | 0.84591900  | -1.70470900 | -0.11633100 |
| H | 0.73091000  | -2.04049100 | 2.01032000  |
| H | 0.60172100  | -1.32263400 | -2.21653900 |
| C | -3.94793900 | 3.27784800  | 1.42470200  |
| C | -4.67819300 | 2.25981000  | 2.03805900  |
| C | -4.48097800 | 0.93131100  | 1.65881500  |
| C | -3.55234500 | 0.59817500  | 0.66734100  |
| C | -2.81827100 | 1.62625100  | 0.06174200  |
| C | -3.01754600 | 2.95531300  | 0.43400000  |
| H | -4.10028100 | 4.31326400  | 1.71621500  |
| H | -5.40569800 | 2.49772100  | 2.80917500  |
| H | -5.06733200 | 0.14334800  | 2.12370000  |
| H | -2.07519100 | 1.38485200  | -0.69231000 |
| H | -2.44455600 | 3.74174500  | -0.05074200 |
| C | 2.98684300  | -0.45599500 | 0.33638900  |
| C | 2.35066500  | -1.77738100 | -0.17656500 |
| H | 2.72640000  | -2.60996000 | 0.43107800  |
| H | 2.66973400  | -1.95466900 | -1.20975400 |
| H | 2.67645000  | -0.35077700 | 1.38443800  |
| C | 4.50936100  | -0.45198500 | 0.31848700  |
| C | 5.18034700  | 0.64762500  | 0.87497500  |
| C | 5.27667000  | -1.48318500 | -0.22943300 |
| C | 6.56998600  | 0.72166300  | 0.89305700  |
| H | 4.59992100  | 1.46660200  | 1.29131400  |
| C | 6.67467800  | -1.42990800 | -0.22544000 |
| H | 4.79699800  | -2.35064800 | -0.66887100 |
| C | 7.29950700  | -0.32665400 | 0.33742700  |
| H | 7.07421000  | 1.57732000  | 1.32750900  |

|    |             |             |             |
|----|-------------|-------------|-------------|
| H  | 7.25729700  | -2.23700000 | -0.65475700 |
| Br | 9.25595400  | -0.23784200 | 0.35049300  |
| C  | 1.21589200  | 2.82274000  | -1.86975700 |
| C  | 0.76788500  | 2.51684500  | -0.58420300 |
| C  | 1.36152400  | 1.47820700  | 0.13357500  |
| C  | 2.40923600  | 0.73385600  | -0.41788600 |
| C  | 2.85745900  | 1.05278900  | -1.70512300 |
| C  | 2.26424300  | 2.08735800  | -2.42800500 |
| H  | 0.75566200  | 3.63038000  | -2.43213700 |
| H  | -0.04550300 | 3.07963500  | -0.13586100 |
| H  | 0.98909900  | 1.22519100  | 1.12213800  |
| H  | 3.68005000  | 0.49021400  | -2.13887100 |
| H  | 2.62327200  | 2.32260800  | -3.42623300 |

**im3b**

SCF Energy (a.u.) = -1356.765959

Thermal correction to Gibbs free energy (a.u.) = 0.400558

Charge = 0, Multiplicity = 1

|    |             |             |             |
|----|-------------|-------------|-------------|
| Ni | -4.87709300 | -0.96864400 | 0.00535600  |
| C  | -4.00204700 | 0.63366100  | -0.31015000 |
| C  | -2.72127500 | 0.82261200  | 0.20826000  |
| C  | -1.97340500 | 1.92463200  | -0.19741000 |
| C  | -2.49497000 | 2.86148000  | -1.10546600 |
| C  | -3.81493600 | 2.68639400  | -1.55174700 |
| C  | -4.57407100 | 1.58212300  | -1.15625600 |
| H  | -2.28428800 | 0.10613300  | 0.89527700  |
| H  | -0.97365900 | 2.04915400  | 0.19934800  |
| H  | -4.24989600 | 3.41535000  | -2.23203300 |
| H  | -5.58958300 | 1.46516900  | -1.52346900 |
| C  | -1.71057700 | 3.99954100  | -1.60526300 |
| C  | -0.38813700 | 4.17474800  | -1.48486800 |
| H  | -2.28661500 | 4.75209000  | -2.14399900 |
| H  | 0.09727700  | 5.05537800  | -1.89446500 |
| H  | 0.25112900  | 3.45588400  | -0.98085900 |

|    |             |             |             |
|----|-------------|-------------|-------------|
| Br | -5.64500600 | -0.48535100 | 2.08113800  |
| C  | 0.30854700  | -1.36017800 | -1.45666400 |
| C  | -0.59704500 | -0.58881100 | -2.19536800 |
| C  | -1.95468000 | -0.88370900 | -2.20964500 |
| C  | -2.45900700 | -1.95605900 | -1.45767700 |
| C  | -1.54915000 | -2.74592000 | -0.73457700 |
| C  | -0.18966900 | -2.45912700 | -0.74277700 |
| H  | -0.23569700 | 0.27352100  | -2.74846600 |
| H  | -2.62921600 | -0.24324400 | -2.76688100 |
| H  | -1.91963500 | -3.58727300 | -0.15398700 |
| H  | 0.48868600  | -3.09324000 | -0.17902400 |
| C  | -3.88932800 | -2.25542700 | -1.34489100 |
| C  | -4.95269500 | -1.59129100 | -1.93803700 |
| H  | -4.10867900 | -3.20264400 | -0.84623400 |
| H  | -5.92848400 | -2.07131400 | -1.99062600 |
| H  | -4.80030700 | -0.75143400 | -2.60665400 |
| C  | 2.38340100  | -0.89418900 | -0.02630700 |
| C  | 1.78041800  | -1.01808500 | -1.44512800 |
| H  | 2.34068200  | -1.79109300 | -1.98895900 |
| H  | 1.92929200  | -0.07829500 | -1.98800700 |
| H  | 2.17048800  | -1.83382200 | 0.49735500  |
| C  | 3.89899100  | -0.73554700 | -0.02684600 |
| C  | 4.63766300  | -0.38974300 | -1.16161300 |
| C  | 4.58720300  | -0.91611800 | 1.18170000  |
| C  | 6.02589300  | -0.22929600 | -1.10263600 |
| H  | 4.14364100  | -0.24033400 | -2.11542400 |
| C  | 5.96829400  | -0.76437600 | 1.26408800  |
| H  | 4.02732500  | -1.16958600 | 2.07821300  |
| C  | 6.67023800  | -0.42020000 | 0.11139800  |
| H  | 6.58684300  | 0.03878400  | -1.99064800 |
| H  | 6.48686600  | -0.90954300 | 2.20486100  |
| Br | 8.61234700  | -0.20106900 | 0.20837400  |
| C  | 0.54132400  | 2.25557100  | 2.31851700  |
| C  | 0.16075000  | 0.92631500  | 2.50514100  |

|   |             |             |             |
|---|-------------|-------------|-------------|
| C | 0.74909000  | -0.08299300 | 1.74019300  |
| C | 1.72283300  | 0.21761600  | 0.78143700  |
| C | 2.09087100  | 1.55617700  | 0.59524700  |
| C | 1.50734100  | 2.56761400  | 1.35841400  |
| H | 0.08514000  | 3.04284900  | 2.91088300  |
| H | -0.59356600 | 0.67341600  | 3.24458800  |
| H | 0.45085600  | -1.11660500 | 1.89180200  |
| H | 2.86116900  | 1.80316600  | -0.13023500 |
| H | 1.81071600  | 3.59976100  | 1.20834000  |

### TS2b

SCF Energy (a.u.) = -1356.752232

Thermal correction to Gibbs free energy (a.u.) = 0.402628

Charge = 0, Multiplicity = 1

|    |             |             |             |
|----|-------------|-------------|-------------|
| Ni | -3.74972800 | -1.09564200 | 0.41336400  |
| C  | -4.53620700 | 0.40102200  | -0.38854800 |
| C  | -3.62698600 | 1.42813200  | -0.70830300 |
| C  | -3.99977800 | 2.75597200  | -0.54545700 |
| C  | -5.29335500 | 3.10325200  | -0.10835800 |
| C  | -6.20177200 | 2.06442500  | 0.15736000  |
| C  | -5.84337500 | 0.72596100  | 0.00237100  |
| H  | -2.62026800 | 1.18941600  | -1.03454000 |
| H  | -3.27393600 | 3.53317500  | -0.76383800 |
| H  | -7.20750400 | 2.31181000  | 0.48793600  |
| H  | -6.56888400 | -0.05645600 | 0.20631700  |
| C  | -5.73121400 | 4.49349600  | 0.06998800  |
| C  | -5.00567600 | 5.60157100  | -0.12719000 |
| H  | -6.76269300 | 4.60493900  | 0.40244200  |
| H  | -5.43381100 | 6.58477900  | 0.03917400  |
| H  | -3.97021800 | 5.57765200  | -0.45501800 |
| Br | -2.81036200 | -2.16412400 | 2.21845500  |
| C  | 0.74312400  | -1.80244000 | -1.87107200 |
| C  | -0.16533400 | -0.90782600 | -2.44705100 |
| C  | -1.53416800 | -1.07553500 | -2.28248300 |

|    |             |             |             |
|----|-------------|-------------|-------------|
| C  | -2.03867600 | -2.14630800 | -1.52581600 |
| C  | -1.12859700 | -3.09625300 | -1.03045700 |
| C  | 0.23827800  | -2.92724700 | -1.20526600 |
| H  | 0.20816500  | -0.03609700 | -2.97611700 |
| H  | -2.20828500 | -0.34334900 | -2.71466500 |
| H  | -1.50206800 | -3.93044400 | -0.44434900 |
| H  | 0.92715100  | -3.64534200 | -0.76724600 |
| C  | -3.45506600 | -2.25161400 | -1.14378800 |
| C  | -4.46294000 | -1.32796500 | -1.55378300 |
| H  | -3.77639400 | -3.22435000 | -0.77540600 |
| H  | -5.49902700 | -1.64784200 | -1.49172100 |
| H  | -4.26363100 | -0.65947800 | -2.38338800 |
| C  | 2.53446900  | -0.88583900 | -0.38152500 |
| C  | 2.20620300  | -1.45687900 | -1.79301500 |
| H  | 2.83412200  | -2.33707300 | -1.97672300 |
| H  | 2.45189000  | -0.70843200 | -2.55437200 |
| H  | 2.36075200  | -1.70535200 | 0.32823800  |
| C  | 3.98294300  | -0.44676900 | -0.21448000 |
| C  | 4.92631500  | -0.49054900 | -1.24421900 |
| C  | 4.39493400  | 0.02682300  | 1.04072800  |
| C  | 6.24674500  | -0.07663200 | -1.03840800 |
| H  | 4.65002500  | -0.85137100 | -2.22873200 |
| C  | 5.70367800  | 0.44097700  | 1.26980500  |
| H  | 3.67153600  | 0.08206600  | 1.84953800  |
| C  | 6.61453600  | 0.38292900  | 0.21771200  |
| H  | 6.96774800  | -0.11500000 | -1.84700700 |
| H  | 6.00719100  | 0.80370800  | 2.24519500  |
| Br | 8.45884700  | 0.96741800  | 0.52039900  |
| C  | -0.35379000 | 2.21698100  | 0.50572700  |
| C  | -0.49910400 | 0.94357400  | 1.05965700  |
| C  | 0.45167000  | -0.04342100 | 0.79796700  |
| C  | 1.55621800  | 0.22495800  | -0.01859000 |
| C  | 1.69664500  | 1.50631300  | -0.56483100 |
| C  | 0.74759600  | 2.49599400  | -0.30737400 |

|   |             |             |             |
|---|-------------|-------------|-------------|
| H | -1.09207800 | 2.98681500  | 0.71243600  |
| H | -1.34941200 | 0.70639800  | 1.69183900  |
| H | 0.31058400  | -1.03692300 | 1.21320500  |
| H | 2.55804900  | 1.72995000  | -1.18906400 |
| H | 0.87253500  | 3.48689000  | -0.73602000 |

#### im4b

SCF Energy (a.u.) = -1356.784883

Thermal correction to Gibbs free energy (a.u.) = 0.405401

Charge = 0, Multiplicity = 1

|    |             |             |             |
|----|-------------|-------------|-------------|
| Ni | -3.63634200 | -0.48896900 | 0.45437600  |
| C  | -4.80045100 | -0.26649500 | -1.27528100 |
| C  | -3.75852400 | 0.69652400  | -1.37696800 |
| C  | -3.98792100 | 2.03114400  | -0.99882000 |
| C  | -5.22769600 | 2.44103100  | -0.50248100 |
| C  | -6.27224100 | 1.48598400  | -0.44062800 |
| C  | -6.06478400 | 0.16836600  | -0.80530200 |
| H  | -2.80850500 | 0.44024500  | -1.83243500 |
| H  | -3.18289300 | 2.74799800  | -1.11236100 |
| H  | -7.24661400 | 1.79502600  | -0.07276900 |
| H  | -6.87368300 | -0.55276900 | -0.72960400 |
| C  | -5.48721700 | 3.81515300  | -0.05180000 |
| C  | -4.56221100 | 4.73490400  | 0.24863900  |
| H  | -6.53903600 | 4.07322600  | 0.06369700  |
| H  | -4.84749300 | 5.72828000  | 0.57937500  |
| H  | -3.49636300 | 4.53046400  | 0.19491500  |
| Br | -2.96473900 | -0.81376600 | 2.62184700  |
| C  | 0.71687700  | -2.36658700 | -1.05637300 |
| C  | -0.09081400 | -1.84297800 | -2.06933600 |
| C  | -1.47622100 | -1.83796700 | -1.94905500 |
| C  | -2.10363900 | -2.34307600 | -0.79658500 |
| C  | -1.28780000 | -2.96483500 | 0.17071400  |
| C  | 0.09211700  | -2.98072900 | 0.03875500  |
| H  | 0.37315800  | -1.37854600 | -2.93489700 |

|    |             |             |             |
|----|-------------|-------------|-------------|
| H  | -2.06649800 | -1.40001800 | -2.74747600 |
| H  | -1.75099600 | -3.37092300 | 1.06448100  |
| H  | 0.69980000  | -3.41974300 | 0.82653900  |
| C  | -3.53575500 | -2.15636800 | -0.50545900 |
| C  | -4.51663500 | -1.73152800 | -1.59905200 |
| H  | -3.93496500 | -2.88718800 | 0.19964300  |
| H  | -5.44362400 | -2.30818200 | -1.53682400 |
| H  | -4.11712200 | -1.85267500 | -2.61170600 |
| C  | 2.49702700  | -0.94183300 | -0.02796300 |
| C  | 2.19626400  | -2.08927300 | -1.03698900 |
| H  | 2.76865900  | -2.97839900 | -0.74518800 |
| H  | 2.53108800  | -1.79257200 | -2.03711500 |
| H  | 2.24051300  | -1.33252400 | 0.96539800  |
| C  | 3.96099400  | -0.52497300 | 0.01872100  |
| C  | 4.94575600  | -1.07516700 | -0.80585100 |
| C  | 4.34473600  | 0.46267900  | 0.93898800  |
| C  | 6.27892700  | -0.65922900 | -0.72310600 |
| H  | 4.69193600  | -1.84266200 | -1.52852200 |
| C  | 5.66520800  | 0.89020900  | 1.04138300  |
| H  | 3.59047800  | 0.91197400  | 1.57915700  |
| C  | 6.61735900  | 0.31847100  | 0.20094800  |
| H  | 7.03217800  | -1.09416100 | -1.37010900 |
| H  | 5.94646400  | 1.65355300  | 1.75783300  |
| Br | 8.47927700  | 0.91267800  | 0.32680400  |
| C  | -0.20873500 | 2.33894700  | -0.84905700 |
| C  | -0.45803000 | 1.47596700  | 0.21943900  |
| C  | 0.43042200  | 0.43593100  | 0.49746800  |
| C  | 1.57603300  | 0.24561900  | -0.28316300 |
| C  | 1.81902300  | 1.11942300  | -1.34998800 |
| C  | 0.93249000  | 2.15734800  | -1.63471500 |
| H  | -0.88677700 | 3.16180200  | -1.06160700 |
| H  | -1.33734900 | 1.60108800  | 0.84440100  |
| H  | 0.20903500  | -0.24332200 | 1.31511100  |
| H  | 2.71299400  | 0.98914700  | -1.95445400 |

H 1.13699900 2.83010300 -2.46325100

**im5b**

SCF Energy (a.u.) = -1497.827499

Thermal correction to Gibbs free energy (a.u.) = 0.472407

Charge = 0, Multiplicity = 1

|    |             |             |             |
|----|-------------|-------------|-------------|
| Ni | -3.72093300 | -0.47427900 | 0.57516400  |
| C  | -5.00659200 | -0.20230600 | -1.10640200 |
| C  | -4.00087100 | 0.79914800  | -1.15766600 |
| C  | -4.27757300 | 2.10526900  | -0.71125900 |
| C  | -5.53076300 | 2.44610400  | -0.19948700 |
| C  | -6.54173900 | 1.45430700  | -0.19454300 |
| C  | -6.28577600 | 0.16572500  | -0.62615800 |
| H  | -3.04773700 | 0.60578300  | -1.63802000 |
| H  | -3.49943000 | 2.85659000  | -0.79027200 |
| H  | -7.52901500 | 1.71096900  | 0.17988900  |
| H  | -7.07085000 | -0.58495500 | -0.59621700 |
| C  | -5.84016600 | 3.78718600  | 0.31696100  |
| C  | -4.95070800 | 4.72134200  | 0.67421700  |
| H  | -6.90148100 | 4.00494000  | 0.43070200  |
| H  | -5.27301300 | 5.68785600  | 1.04803300  |
| H  | -3.87807300 | 4.55497100  | 0.62344400  |
| C  | 0.59746600  | -2.26232200 | -1.23987000 |
| C  | -0.24891900 | -1.61798100 | -2.14547400 |
| C  | -1.62865900 | -1.62768600 | -1.96988200 |
| C  | -2.21432600 | -2.26857900 | -0.86487300 |
| C  | -1.36475600 | -3.02412800 | -0.03343400 |
| C  | 0.01136200  | -3.01734500 | -0.21501600 |
| H  | 0.18173400  | -1.04341800 | -2.96098900 |
| H  | -2.24651000 | -1.08360200 | -2.67720900 |
| H  | -1.79493300 | -3.57132400 | 0.79986700  |
| H  | 0.64633500  | -3.56141600 | 0.48112300  |
| C  | -3.62804300 | -2.08462800 | -0.47727100 |
| C  | -4.66710300 | -1.63347000 | -1.51008200 |

|    |             |             |             |
|----|-------------|-------------|-------------|
| H  | -3.98606000 | -2.87573800 | 0.18712800  |
| H  | -5.56783400 | -2.25233400 | -1.45556600 |
| H  | -4.29727900 | -1.68159700 | -2.54096200 |
| C  | 2.38639200  | -0.93262900 | -0.10596800 |
| C  | 2.07337100  | -1.96566100 | -1.22989600 |
| H  | 2.66780100  | -2.87118900 | -1.05562500 |
| H  | 2.37572700  | -1.55220900 | -2.19867900 |
| H  | 2.16947900  | -1.44063800 | 0.84307500  |
| C  | 3.84305800  | -0.49190600 | -0.05434300 |
| C  | 4.81511400  | -0.93751600 | -0.95389400 |
| C  | 4.23523300  | 0.40529800  | 0.95119200  |
| C  | 6.14326400  | -0.50757300 | -0.86189100 |
| H  | 4.55432500  | -1.63228400 | -1.74438600 |
| C  | 5.55094600  | 0.84474700  | 1.06454300  |
| H  | 3.49028800  | 0.77451800  | 1.65067500  |
| C  | 6.48987400  | 0.37788800  | 0.14802600  |
| H  | 6.88624000  | -0.86080400 | -1.56787800 |
| H  | 5.83846100  | 1.53768900  | 1.84705800  |
| Br | 8.34556900  | 0.99056800  | 0.28871500  |
| C  | -0.42560900 | 2.34133700  | -0.47000500 |
| C  | -0.62278800 | 1.35181600  | 0.49433500  |
| C  | 0.30347100  | 0.31686500  | 0.62823300  |
| C  | 1.43396100  | 0.25438900  | -0.19325200 |
| C  | 1.62558200  | 1.25547800  | -1.15355300 |
| C  | 0.70179000  | 2.29067200  | -1.29448900 |
| H  | -1.13579800 | 3.15830700  | -0.57184300 |
| H  | -1.49052400 | 1.36556400  | 1.14641200  |
| H  | 0.11709800  | -0.46167500 | 1.36053300  |
| H  | 2.50640000  | 1.22442100  | -1.78983000 |
| H  | 0.86562600  | 3.06175200  | -2.04265300 |
| O  | -2.87797900 | -0.76426800 | 2.09558600  |
| C  | -2.91981800 | -1.85488700 | 2.97034000  |
| C  | -1.55018200 | -2.07374200 | 3.61221200  |
| H  | -3.21844000 | -2.77695100 | 2.44153700  |

|   |             |             |            |
|---|-------------|-------------|------------|
| H | -3.67582300 | -1.69232900 | 3.75862800 |
| H | -1.57296700 | -2.90482700 | 4.32885200 |
| H | -0.80478300 | -2.29545400 | 2.84034400 |
| H | -1.23285900 | -1.16779900 | 4.14040800 |

**im6b**

SCF Energy (a.u.) = -2101.541156

Thermal correction to Gibbs free energy (a.u.) = 0.696468

Charge = 0, Multiplicity = 1

|    |             |             |             |
|----|-------------|-------------|-------------|
| C  | -7.73596000 | -2.93592500 | -1.32883200 |
| C  | -8.74266500 | -2.08013400 | -1.11131600 |
| H  | -7.94806000 | -4.00482600 | -1.29810900 |
| C  | -6.33011700 | -2.58965900 | -1.58101100 |
| C  | -5.34050800 | -3.57937200 | -1.45603400 |
| C  | -5.91799100 | -1.29223800 | -1.93181100 |
| C  | -3.99210800 | -3.27610500 | -1.63500700 |
| H  | -5.63676700 | -4.59571500 | -1.20607500 |
| C  | -4.57243200 | -0.99044100 | -2.10058400 |
| H  | -6.65808000 | -0.50937100 | -2.05820600 |
| C  | -3.58422600 | -1.97336000 | -1.94422800 |
| H  | -3.24410800 | -4.05823900 | -1.52358900 |
| H  | -4.26656100 | 0.02811800  | -2.31734200 |
| Ni | -2.76209600 | -0.39384500 | 0.43922300  |
| C  | -1.55643500 | -1.45753800 | -0.58948200 |
| C  | -2.12055200 | -1.60288700 | -2.00387100 |
| H  | -1.55271700 | -2.36142800 | -2.56609300 |
| H  | -2.01781200 | -0.65380500 | -2.53534900 |
| H  | -1.67086100 | -2.40443500 | -0.03841700 |
| C  | -0.17885300 | -0.93641700 | -0.43434900 |
| C  | 0.46442700  | -0.15491100 | -1.40969700 |
| C  | 0.51980300  | -1.17146200 | 0.76596100  |
| C  | 1.73812500  | 0.36537500  | -1.18935200 |
| H  | -0.04265700 | 0.06499900  | -2.34245800 |
| C  | 1.78901400  | -0.65016500 | 0.98368200  |

|    |             |             |             |
|----|-------------|-------------|-------------|
| H  | 0.04448400  | -1.77092700 | 1.53952900  |
| C  | 2.42300900  | 0.13017400  | 0.00740600  |
| H  | 2.20850900  | 0.96967300  | -1.96268100 |
| H  | 2.30990500  | -0.86714100 | 1.91252700  |
| C  | 4.87778400  | -0.32624700 | -0.43214000 |
| C  | 3.83193200  | 0.63100800  | 0.20073500  |
| H  | 3.94569000  | 1.62227100  | -0.25505900 |
| H  | 4.04441100  | 0.73705000  | 1.27087200  |
| H  | 4.59377600  | -0.44153000 | -1.48626700 |
| C  | 6.30129000  | 0.21136500  | -0.40759600 |
| C  | 6.69653200  | 1.30646500  | 0.36548100  |
| C  | 7.27468500  | -0.43746400 | -1.18154700 |
| C  | 8.02279700  | 1.75109000  | 0.37121000  |
| H  | 5.97321600  | 1.83464700  | 0.97693300  |
| C  | 8.60004600  | -0.01199200 | -1.19443300 |
| H  | 6.98852800  | -1.30008200 | -1.77772900 |
| C  | 8.95420100  | 1.08350100  | -0.41098700 |
| H  | 8.31564500  | 2.60217000  | 0.97544500  |
| H  | 9.34086000  | -0.52213500 | -1.79949500 |
| Br | 10.81515000 | 1.69573100  | -0.41490600 |
| C  | 4.49340400  | -4.20299600 | 1.45958400  |
| C  | 3.87927700  | -3.95515900 | 0.23156100  |
| C  | 4.02765600  | -2.71318200 | -0.38666100 |
| C  | 4.79014900  | -1.70376500 | 0.20976600  |
| C  | 5.40564300  | -1.96260300 | 1.44032100  |
| C  | 5.25785400  | -3.20164300 | 2.06270100  |
| H  | 4.38070100  | -5.16967700 | 1.94246400  |
| H  | 3.28126300  | -4.72655900 | -0.24576400 |
| H  | 3.52954700  | -2.51486900 | -1.33174100 |
| H  | 6.01134000  | -1.19074700 | 1.90744100  |
| H  | 5.74418800  | -3.38738100 | 3.01652900  |
| O  | -2.56263300 | 1.12892800  | -0.50247200 |
| C  | -1.63958700 | 2.05782200  | 0.01253400  |
| C  | -1.35829300 | 3.13028800  | -1.03808900 |

|   |             |             |             |
|---|-------------|-------------|-------------|
| H | -0.68718700 | 1.57234100  | 0.27637000  |
| H | -2.02936100 | 2.53232600  | 0.93196200  |
| H | -0.68509500 | 3.90243700  | -0.64492200 |
| H | -0.89531400 | 2.67741300  | -1.92140400 |
| H | -2.29127100 | 3.61156200  | -1.35639700 |
| C | -2.94009100 | -1.76660500 | 3.07370000  |
| C | -3.80542200 | -2.01638800 | 1.99202400  |
| C | -4.59466200 | -0.97575700 | 1.46949200  |
| C | -4.46392100 | 0.34578000  | 1.98028700  |
| C | -3.59862800 | 0.55609300  | 3.06989900  |
| C | -2.86179300 | -0.49179400 | 3.63461500  |
| H | -2.33294300 | -2.57517900 | 3.47104600  |
| H | -3.88590400 | -3.01207000 | 1.56783400  |
| H | -5.29835000 | -1.17461800 | 0.66881400  |
| H | -3.48010300 | 1.56688100  | 3.44817800  |
| H | -2.19810700 | -0.30406300 | 4.47285100  |
| C | -6.09620000 | 2.33460000  | -0.83623400 |
| C | -4.97662400 | 3.92048900  | 0.69453500  |
| C | -6.23889300 | 3.70303800  | -0.15421500 |
| H | -5.25821300 | 2.34594000  | -1.54456200 |
| H | -5.09160600 | 4.80110900  | 1.33566200  |
| B | -5.04927900 | 1.55257000  | 1.16920500  |
| O | -5.86081300 | 1.28784000  | 0.10483000  |
| O | -4.68463400 | 2.81210300  | 1.54834900  |
| H | -7.01033500 | 2.07993300  | -1.38343200 |
| H | -4.10697000 | 4.08094300  | 0.04633300  |
| C | -6.31980600 | 4.79791900  | -1.22439800 |
| H | -5.43980100 | 4.78503300  | -1.87808700 |
| H | -7.20947000 | 4.66478100  | -1.85075200 |
| H | -6.38445400 | 5.79028000  | -0.76311200 |
| C | -7.49409500 | 3.72826100  | 0.73224700  |
| H | -7.59970100 | 4.70229800  | 1.22350400  |
| H | -8.39415800 | 3.55246200  | 0.13185200  |
| H | -7.45450700 | 2.96037100  | 1.51010100  |

|   |             |             |             |
|---|-------------|-------------|-------------|
| H | -8.59642500 | -1.00351200 | -1.09159200 |
| H | -9.75229900 | -2.43583200 | -0.93100500 |

### TS3b

SCF Energy (a.u.) = -2101.533966

Thermal correction to Gibbs free energy (a.u.) = 0.698000

Charge = 0, Multiplicity = 1

|    |             |             |             |
|----|-------------|-------------|-------------|
| C  | -7.78495700 | -2.82481100 | -1.37873200 |
| C  | -8.78329700 | -1.98314100 | -1.08254100 |
| H  | -7.99476600 | -3.89450400 | -1.38847700 |
| C  | -6.39016500 | -2.46661500 | -1.67318400 |
| C  | -5.41039000 | -3.47355400 | -1.68957500 |
| C  | -5.97817100 | -1.14602800 | -1.92280200 |
| C  | -4.06873100 | -3.17022800 | -1.91139000 |
| H  | -5.70777100 | -4.50515200 | -1.51580200 |
| C  | -4.63960500 | -0.84449900 | -2.13944600 |
| H  | -6.70406100 | -0.34025200 | -1.92045900 |
| C  | -3.66022100 | -1.84889000 | -2.12840400 |
| H  | -3.32761800 | -3.96665100 | -1.90834600 |
| H  | -4.33836100 | 0.18854200  | -2.27507600 |
| Ni | -2.84501300 | -0.55267300 | 0.33590900  |
| C  | -1.60237600 | -1.35892300 | -0.82685000 |
| C  | -2.19482500 | -1.48952200 | -2.22867900 |
| H  | -1.64705500 | -2.23910300 | -2.82068000 |
| H  | -2.09549800 | -0.53290800 | -2.75246000 |
| H  | -1.75802500 | -2.30603100 | -0.25571300 |
| C  | -0.21470700 | -0.88354400 | -0.67055700 |
| C  | 0.48809200  | -0.21720700 | -1.68958500 |
| C  | 0.43126200  | -1.02720000 | 0.57488600  |
| C  | 1.76298000  | 0.29787400  | -1.46331600 |
| H  | 0.03200000  | -0.08926900 | -2.66541000 |
| C  | 1.70198800  | -0.51383400 | 0.79565900  |
| H  | -0.08666000 | -1.54642600 | 1.37867300  |
| C  | 2.39116500  | 0.16315300  | -0.22088500 |

|    |             |             |             |
|----|-------------|-------------|-------------|
| H  | 2.28041700  | 0.81467100  | -2.26891300 |
| H  | 2.18046700  | -0.65489300 | 1.76074800  |
| C  | 4.85251600  | -0.38739300 | -0.47599300 |
| C  | 3.80052500  | 0.65600900  | -0.01203900 |
| H  | 3.96032700  | 1.58635200  | -0.57033000 |
| H  | 3.96081300  | 0.87942200  | 1.04887000  |
| H  | 4.62439300  | -0.61257000 | -1.52600300 |
| C  | 6.28652700  | 0.12044600  | -0.42651900 |
| C  | 6.66638300  | 1.29065000  | 0.23620500  |
| C  | 7.28452800  | -0.63609700 | -1.05824600 |
| C  | 8.00211900  | 1.70447800  | 0.27126400  |
| H  | 5.92446700  | 1.90319400  | 0.73664500  |
| C  | 8.61971700  | -0.24316000 | -1.03930500 |
| H  | 7.00965500  | -1.55716600 | -1.56567000 |
| C  | 8.95860400  | 0.92963500  | -0.36898800 |
| H  | 8.28297900  | 2.61457200  | 0.78895300  |
| H  | 9.37989500  | -0.83704800 | -1.53381900 |
| Br | 10.83233000 | 1.49719400  | -0.33026000 |
| C  | 4.25526800  | -4.01911600 | 1.80530900  |
| C  | 3.74329800  | -3.90909000 | 0.51222000  |
| C  | 3.96116300  | -2.74736700 | -0.22950800 |
| C  | 4.69215100  | -1.68283400 | 0.30691800  |
| C  | 5.20692300  | -1.80424000 | 1.60332800  |
| C  | 4.98897400  | -2.96204500 | 2.34898700  |
| H  | 4.08782800  | -4.92256300 | 2.38486500  |
| H  | 3.17137400  | -4.72543900 | 0.07988300  |
| H  | 3.54267300  | -2.65521200 | -1.22817100 |
| H  | 5.78901400  | -0.98948600 | 2.02554400  |
| H  | 5.39652800  | -3.04152400 | 3.35307800  |
| O  | -2.88795500 | 1.22053900  | -0.15394200 |
| C  | -1.71709800 | 2.02589400  | -0.06138000 |
| C  | -1.48694800 | 2.76085500  | -1.37582200 |
| H  | -0.84505800 | 1.40516600  | 0.16698100  |
| H  | -1.84779400 | 2.73110500  | 0.76820300  |

|   |             |             |             |
|---|-------------|-------------|-------------|
| H | -0.60915900 | 3.41494000  | -1.30583400 |
| H | -1.31847000 | 2.04476500  | -2.18644000 |
| H | -2.35640200 | 3.37408700  | -1.63832400 |
| C | -3.82981600 | -2.09526900 | 3.31025800  |
| C | -4.67753900 | -2.09953500 | 2.19987200  |
| C | -4.90911200 | -0.90962400 | 1.49046800  |
| C | -4.26474600 | 0.29659500  | 1.85827400  |
| C | -3.42312700 | 0.26988800  | 2.99416400  |
| C | -3.21662000 | -0.90305800 | 3.71838800  |
| H | -3.65224200 | -3.01430500 | 3.86213100  |
| H | -5.16887600 | -3.01576700 | 1.88511900  |
| H | -5.59283600 | -0.90514000 | 0.64859000  |
| H | -2.93099900 | 1.19131200  | 3.29215400  |
| H | -2.56841400 | -0.89869700 | 4.59047800  |
| C | -5.63845300 | 2.70953400  | -0.77332800 |
| C | -4.35150500 | 4.02302600  | 0.88059900  |
| C | -5.68002400 | 3.97198400  | 0.10505100  |
| H | -4.84063600 | 2.80881500  | -1.52703000 |
| H | -4.38250200 | 4.82173400  | 1.63178200  |
| B | -4.37440200 | 1.60022200  | 0.92948100  |
| O | -5.42474500 | 1.54329900  | -0.00170200 |
| O | -4.06021000 | 2.81180200  | 1.56320200  |
| H | -6.58941300 | 2.58678600  | -1.30698100 |
| H | -3.53479300 | 4.25936600  | 0.18191500  |
| C | -5.79653100 | 5.21527000  | -0.78270400 |
| H | -4.97006400 | 5.27424500  | -1.50159400 |
| H | -6.73556600 | 5.20417700  | -1.34889400 |
| H | -5.78394100 | 6.13106200  | -0.17944900 |
| C | -6.86359700 | 3.89554800  | 1.08046700  |
| H | -6.90061000 | 4.78924300  | 1.71489300  |
| H | -7.81229700 | 3.82921200  | 0.53413500  |
| H | -6.78268600 | 3.01915300  | 1.72823900  |
| H | -8.64305400 | -0.90716000 | -1.02692300 |
| H | -9.78280400 | -2.35192100 | -0.87451300 |

**im7b**

SCF Energy (a.u.) = -2101.545485

Thermal correction to Gibbs free energy (a.u.) = 0.703357

Charge = 0, Multiplicity = 1

|    |             |             |             |
|----|-------------|-------------|-------------|
| C  | -8.04005800 | -1.34344500 | -1.78326500 |
| C  | -8.64516300 | -0.89338100 | -2.88896000 |
| H  | -8.65177600 | -1.58983200 | -0.91750600 |
| C  | -6.60112500 | -1.57322600 | -1.60108100 |
| C  | -6.15862900 | -2.25332400 | -0.46768600 |
| C  | -5.63481000 | -1.14283500 | -2.54169200 |
| C  | -4.79966000 | -2.56121800 | -0.28794500 |
| H  | -6.87830900 | -2.56873600 | 0.28073100  |
| C  | -4.29686100 | -1.43195300 | -2.37425700 |
| H  | -5.94874200 | -0.56548800 | -3.40488200 |
| C  | -3.84657400 | -2.18044600 | -1.25933900 |
| H  | -4.50637200 | -3.19906100 | 0.54139600  |
| H  | -3.56922400 | -1.09326800 | -3.10574000 |
| Ni | -3.36005300 | -0.78757600 | 0.37629400  |
| C  | -1.93434200 | -2.07334300 | 0.24861300  |
| C  | -2.39332400 | -2.60788900 | -1.11171800 |
| H  | -2.29457400 | -3.70035900 | -1.18975600 |
| H  | -1.80335100 | -2.16878000 | -1.92036900 |
| H  | -2.13070700 | -2.79239000 | 1.05365800  |
| C  | -0.56648900 | -1.51857300 | 0.35043700  |
| C  | -0.09771800 | -0.54796500 | -0.55301200 |
| C  | 0.29693700  | -1.92600800 | 1.37746300  |
| C  | 1.18023700  | -0.01768900 | -0.43162000 |
| H  | -0.76516100 | -0.17240100 | -1.32257600 |
| C  | 1.58160600  | -1.39811400 | 1.49338100  |
| H  | -0.04184600 | -2.67426800 | 2.09007600  |
| C  | 2.04374300  | -0.43374400 | 0.59287000  |
| H  | 1.51297600  | 0.74454200  | -1.13307300 |
| H  | 2.23956700  | -1.74873700 | 2.28370300  |

|    |             |             |             |
|----|-------------|-------------|-------------|
| C  | 4.41365500  | -0.67077900 | -0.27398100 |
| C  | 3.45193700  | 0.09895200  | 0.67042300  |
| H  | 3.46683000  | 1.16080800  | 0.39607200  |
| H  | 3.82120400  | 0.02174400  | 1.69934600  |
| H  | 3.97634300  | -0.61061500 | -1.27920400 |
| C  | 5.80945800  | -0.06952400 | -0.35518900 |
| C  | 6.28411700  | 0.89630900  | 0.53633800  |
| C  | 6.67456800  | -0.52295300 | -1.36185600 |
| C  | 7.58342200  | 1.40405500  | 0.43300000  |
| H  | 5.64571700  | 1.27231400  | 1.32822400  |
| C  | 7.97066200  | -0.03079800 | -1.48637000 |
| H  | 6.32744500  | -1.28491200 | -2.05492500 |
| C  | 8.40658300  | 0.93172100  | -0.57914400 |
| H  | 7.93872100  | 2.15340500  | 1.13113100  |
| H  | 8.62732600  | -0.38912100 | -2.27093000 |
| Br | 10.22769700 | 1.63460900  | -0.73781700 |
| C  | 4.42442400  | -4.83752900 | 0.90556200  |
| C  | 3.63508600  | -4.41116300 | -0.16282900 |
| C  | 3.65446300  | -3.07252200 | -0.55607600 |
| C  | 4.46091200  | -2.14330500 | 0.10862800  |
| C  | 5.25278100  | -2.58098200 | 1.17711300  |
| C  | 5.23425500  | -3.91718300 | 1.57502200  |
| H  | 4.41203500  | -5.87931400 | 1.21335300  |
| H  | 3.00098000  | -5.11877500 | -0.68981900 |
| H  | 3.02268500  | -2.73838400 | -1.37469000 |
| H  | 5.89381900  | -1.87103500 | 1.69275000  |
| H  | 5.85626900  | -4.24134900 | 2.40488900  |
| O  | -2.41487300 | 0.56296000  | 1.28343000  |
| C  | -2.05393500 | 0.46201100  | 2.66609400  |
| C  | -0.72200000 | 1.14033600  | 2.94437600  |
| H  | -1.98128500 | -0.60498300 | 2.90416700  |
| H  | -2.83952700 | 0.90681000  | 3.28632800  |
| H  | -0.41019200 | 0.93193700  | 3.97555300  |
| H  | 0.04793200  | 0.76649900  | 2.26600700  |

|   |             |             |             |
|---|-------------|-------------|-------------|
| H | -0.80508500 | 2.22209400  | 2.82728000  |
| C | -7.65201900 | 0.55383600  | 1.05634700  |
| C | -7.17448800 | 1.24310000  | -0.06416400 |
| C | -5.81416000 | 1.50306100  | -0.19340700 |
| C | -4.88587600 | 1.12637200  | 0.80016500  |
| C | -5.39580800 | 0.41883200  | 1.90815100  |
| C | -6.75898500 | 0.12707200  | 2.03612500  |
| H | -8.71510900 | 0.35002500  | 1.15857300  |
| H | -7.86687700 | 1.55800400  | -0.83931000 |
| H | -5.43957200 | 2.02505900  | -1.06833700 |
| H | -4.72712400 | 0.11754900  | 2.70964800  |
| H | -7.12002200 | -0.41164300 | 2.90888000  |
| C | -1.90723700 | 2.64274900  | -0.98961300 |
| C | -2.25337000 | 3.86843200  | 1.11899800  |
| C | -2.11951700 | 4.04817600  | -0.40363800 |
| H | -0.96629000 | 2.22446000  | -0.59482900 |
| H | -2.54177200 | 4.81994300  | 1.58606500  |
| B | -3.35344800 | 1.70983800  | 0.71180400  |
| O | -2.99252700 | 1.79232900  | -0.68893800 |
| O | -3.21800800 | 2.90438500  | 1.49096300  |
| H | -1.81461400 | 2.69679300  | -2.08324100 |
| H | -1.26202100 | 3.59964700  | 1.51857500  |
| C | -0.89917600 | 4.92282300  | -0.70867000 |
| H | 0.02555800  | 4.46340600  | -0.33771200 |
| H | -0.78877500 | 5.07776200  | -1.78904900 |
| H | -0.99524800 | 5.91002900  | -0.24018000 |
| C | -3.39194500 | 4.68429600  | -0.98020800 |
| H | -3.51293100 | 5.70873700  | -0.60713200 |
| H | -3.34668900 | 4.72653100  | -2.07573500 |
| H | -4.27833300 | 4.11328900  | -0.69502800 |
| H | -8.10217400 | -0.63978300 | -3.79495300 |
| H | -9.72259700 | -0.76733500 | -2.92304900 |

TS4b

SCF Energy (a.u.) = -2101.524464

Thermal correction to Gibbs free energy (a.u.) = 0.704099

Charge = 0, Multiplicity = 1

|    |             |             |             |
|----|-------------|-------------|-------------|
| C  | -7.75206400 | -2.38080000 | -1.53602600 |
| C  | -8.38374600 | -2.41900900 | -2.71507800 |
| H  | -8.34601000 | -2.28614300 | -0.62882500 |
| C  | -6.30358900 | -2.47091100 | -1.31133000 |
| C  | -5.82373600 | -2.66476500 | -0.01677800 |
| C  | -5.35988800 | -2.36953700 | -2.35921400 |
| C  | -4.44963700 | -2.79422700 | 0.23872000  |
| H  | -6.52626600 | -2.72651400 | 0.80853100  |
| C  | -4.00498700 | -2.48654300 | -2.11701000 |
| H  | -5.70450100 | -2.17772600 | -3.37030400 |
| C  | -3.51410500 | -2.72440600 | -0.81433300 |
| H  | -4.11950200 | -3.04650800 | 1.24263000  |
| H  | -3.29699200 | -2.40439100 | -2.93746100 |
| Ni | -3.10769600 | -0.73674700 | 0.46057400  |
| C  | -1.65080500 | -2.03912700 | 0.65918700  |
| C  | -2.03385800 | -2.92581400 | -0.53727700 |
| H  | -1.81657200 | -3.99040200 | -0.35840100 |
| H  | -1.46466700 | -2.63648900 | -1.42599900 |
| H  | -1.80747500 | -2.57659400 | 1.60374600  |
| C  | -0.28994200 | -1.44891600 | 0.62428400  |
| C  | 0.14745000  | -0.67050400 | -0.46398800 |
| C  | 0.59743100  | -1.60009600 | 1.70227100  |
| C  | 1.40656500  | -0.08195700 | -0.47017700 |
| H  | -0.52779300 | -0.49482700 | -1.29735600 |
| C  | 1.85861800  | -1.00743600 | 1.69743000  |
| H  | 0.29239400  | -2.20096700 | 2.55634600  |
| C  | 2.28583500  | -0.23802200 | 0.61088800  |
| H  | 1.71041800  | 0.52384700  | -1.32153700 |
| H  | 2.53038100  | -1.16271200 | 2.53755600  |
| C  | 4.65696900  | -0.57669000 | -0.21873000 |
| C  | 3.67676100  | 0.34189700  | 0.55940500  |

|    |             |             |             |
|----|-------------|-------------|-------------|
| H  | 3.65754900  | 1.32442200  | 0.07185900  |
| H  | 4.05556400  | 0.48936200  | 1.57736400  |
| H  | 4.20944800  | -0.73949000 | -1.20791700 |
| C  | 6.03125100  | 0.03672600  | -0.44438400 |
| C  | 6.48351300  | 1.17767800  | 0.22405900  |
| C  | 6.90050900  | -0.58582300 | -1.35232200 |
| C  | 7.76435200  | 1.69253000  | -0.00209500 |
| H  | 5.84112800  | 1.68740300  | 0.93369600  |
| C  | 8.17847300  | -0.09080500 | -1.59618500 |
| H  | 6.57131300  | -1.48306700 | -1.87001400 |
| C  | 8.59185600  | 1.04883700  | -0.91087600 |
| H  | 8.10230500  | 2.57856700  | 0.52319400  |
| H  | 8.83838800  | -0.58157000 | -2.30245700 |
| Br | 10.38776800 | 1.75921300  | -1.23975700 |
| C  | 4.81616500  | -4.40749200 | 1.79494100  |
| C  | 3.98906000  | -4.22940900 | 0.68557800  |
| C  | 3.96080400  | -3.00127900 | 0.02418500  |
| C  | 4.75644800  | -1.93627100 | 0.45864600  |
| C  | 5.58561200  | -2.12505000 | 1.57082400  |
| C  | 5.61509800  | -3.35020100 | 2.23606000  |
| H  | 4.84074300  | -5.36304300 | 2.31128100  |
| H  | 3.36169200  | -5.04452500 | 0.33559000  |
| H  | 3.29861300  | -2.85778400 | -0.82528900 |
| H  | 6.21777900  | -1.30904200 | 1.91041000  |
| H  | 6.26585400  | -3.48111200 | 3.09638200  |
| O  | -2.21413100 | 0.75694800  | 1.16509000  |
| C  | -1.69558200 | 0.82223300  | 2.51146500  |
| C  | -0.53056900 | 1.79380000  | 2.56268400  |
| H  | -1.36608300 | -0.18586300 | 2.76112400  |
| H  | -2.50262000 | 1.12236700  | 3.18446400  |
| H  | -0.11558700 | 1.82235400  | 3.57732100  |
| H  | 0.25471600  | 1.47864000  | 1.87087400  |
| H  | -0.85622600 | 2.80410800  | 2.29632800  |
| C  | -7.45706200 | 0.75528500  | -0.57224300 |

|   |             |             |             |
|---|-------------|-------------|-------------|
| C | -6.47068300 | 0.82809300  | -1.55655100 |
| C | -5.12520900 | 0.72282500  | -1.19916900 |
| C | -4.71639100 | 0.54307800  | 0.13709600  |
| C | -5.74124600 | 0.47216400  | 1.10450300  |
| C | -7.09061300 | 0.57518700  | 0.76523100  |
| H | -8.50554900 | 0.83834400  | -0.84532100 |
| H | -6.75327900 | 0.96272200  | -2.59781000 |
| H | -4.36472200 | 0.79817800  | -1.97294600 |
| H | -5.47132000 | 0.36104400  | 2.15338900  |
| H | -7.85602000 | 0.52592600  | 1.53654800  |
| C | -3.36813800 | 3.51520300  | -1.01377300 |
| C | -3.58726900 | 3.99527700  | 1.42875500  |
| C | -4.13970500 | 4.35776700  | 0.04320900  |
| H | -2.58368000 | 4.12602100  | -1.47577700 |
| H | -4.15875400 | 4.50971300  | 2.20927000  |
| B | -3.14178000 | 1.78002800  | 0.68735800  |
| O | -2.70945700 | 2.36343300  | -0.50236100 |
| O | -3.67748200 | 2.60100500  | 1.68937100  |
| H | -4.06018900 | 3.20768400  | -1.80999100 |
| H | -2.53890600 | 4.32408800  | 1.50780900  |
| C | -3.89877200 | 5.85003500  | -0.22671000 |
| H | -2.83392600 | 6.10321500  | -0.15752900 |
| H | -4.24460600 | 6.12383100  | -1.23076200 |
| H | -4.44484800 | 6.47312500  | 0.49163800  |
| C | -5.64824300 | 4.06648100  | 0.00134100  |
| H | -6.17882200 | 4.70529900  | 0.71840300  |
| H | -6.05520400 | 4.27027100  | -0.99587400 |
| H | -5.86519100 | 3.02775000  | 0.25020800  |
| H | -7.85818100 | -2.52612100 | -3.65987700 |
| H | -9.46531000 | -2.34820100 | -2.77176000 |

**im8b**

SCF Energy (a.u.) = -2101.540692

Thermal correction to Gibbs free energy (a.u.) = 0.703474

Charge = 0, Multiplicity = 1

|    |             |             |             |
|----|-------------|-------------|-------------|
| C  | -8.02011200 | -1.91411300 | -1.35623800 |
| C  | -8.70325500 | -1.51294800 | -2.43466600 |
| H  | -8.56311300 | -2.06630900 | -0.42467200 |
| C  | -6.57732300 | -2.16764600 | -1.27027500 |
| C  | -6.03202000 | -2.59788300 | -0.06249700 |
| C  | -5.69704500 | -1.96655800 | -2.35914500 |
| C  | -4.65117400 | -2.80669700 | 0.08223700  |
| H  | -6.68516600 | -2.75580600 | 0.79085900  |
| C  | -4.33785400 | -2.17128500 | -2.23007000 |
| H  | -6.09282900 | -1.62196400 | -3.30889300 |
| C  | -3.77265800 | -2.59781600 | -1.00628900 |
| H  | -4.27131800 | -3.22181400 | 1.01082500  |
| H  | -3.67983800 | -2.00137300 | -3.07838600 |
| Ni | -3.33116200 | -0.81719900 | 0.39599500  |
| C  | -1.85266400 | -2.17235600 | 0.46164700  |
| C  | -2.28439600 | -2.86404500 | -0.84429600 |
| H  | -2.07664000 | -3.94638900 | -0.85595500 |
| H  | -1.75393500 | -2.43624100 | -1.70165100 |
| H  | -2.00080800 | -2.85377700 | 1.31035200  |
| C  | -0.48271700 | -1.61697100 | 0.49970500  |
| C  | -0.03865200 | -0.67111400 | -0.44769700 |
| C  | 0.41704200  | -1.95813100 | 1.52465500  |
| C  | 1.22626800  | -0.10110100 | -0.36403800 |
| H  | -0.71737600 | -0.34880400 | -1.23297200 |
| C  | 1.68708100  | -1.38931500 | 1.60514500  |
| H  | 0.11163000  | -2.68967900 | 2.26979000  |
| C  | 2.11500200  | -0.44728000 | 0.66449500  |
| H  | 1.53138000  | 0.63547800  | -1.10564500 |
| H  | 2.36504500  | -1.69571300 | 2.39801800  |
| C  | 4.46942900  | -0.65053500 | -0.25742800 |
| C  | 3.51316900  | 0.11627700  | 0.69588600  |
| H  | 3.50229200  | 1.17303600  | 0.40002800  |
| H  | 3.91029900  | 0.06761800  | 1.71653200  |

|    |             |             |             |
|----|-------------|-------------|-------------|
| H  | 4.00011300  | -0.62741100 | -1.24954600 |
| C  | 5.84365700  | -0.01310100 | -0.39804600 |
| C  | 6.33100500  | 0.96249900  | 0.47614800  |
| C  | 6.67702700  | -0.44029100 | -1.44223200 |
| C  | 7.61074800  | 1.50503700  | 0.31969600  |
| H  | 5.71663000  | 1.31780000  | 1.29612800  |
| C  | 7.95337600  | 0.08636100  | -1.62019900 |
| H  | 6.32059000  | -1.20913800 | -2.12289300 |
| C  | 8.40176800  | 1.05762600  | -0.72874700 |
| H  | 7.97613300  | 2.26125900  | 1.00516900  |
| H  | 8.58520700  | -0.25222000 | -2.43342000 |
| Br | 10.19558200 | 1.81061000  | -0.96291900 |
| C  | 4.62910100  | -4.78652400 | 1.01739000  |
| C  | 3.76058200  | -4.39657200 | -0.00260600 |
| C  | 3.73222500  | -3.06812500 | -0.42743900 |
| C  | 4.56888500  | -2.11182500 | 0.15766500  |
| C  | 5.43845600  | -2.51257100 | 1.17897800  |
| C  | 5.46853800  | -3.83929700 | 1.60763600  |
| H  | 4.65378900  | -5.82070700 | 1.34936700  |
| H  | 3.10054900  | -5.12451500 | -0.46616900 |
| H  | 3.03806500  | -2.76220100 | -1.20524700 |
| H  | 6.10166500  | -1.78178800 | 1.63376800  |
| H  | 6.15125600  | -4.13453700 | 2.39984400  |
| O  | -2.31804800 | 0.57808300  | 1.39269800  |
| C  | -2.08802000 | 0.33621600  | 2.80693100  |
| C  | -0.74608600 | 0.87237700  | 3.27574400  |
| H  | -2.12173400 | -0.74916800 | 2.90587800  |
| H  | -2.92189600 | 0.77445900  | 3.36374800  |
| H  | -0.57241900 | 0.53546900  | 4.30466300  |
| H  | 0.05876000  | 0.48197700  | 2.64895800  |
| H  | -0.72720300 | 1.96343600  | 3.26214200  |
| C  | -7.30287300 | 1.80530900  | -0.15148200 |
| C  | -6.45348700 | 1.59375200  | -1.23989000 |
| C  | -5.26018200 | 0.88760600  | -1.07053000 |

|   |             |             |             |
|---|-------------|-------------|-------------|
| C | -4.88013700 | 0.34310100  | 0.17092100  |
| C | -5.74239500 | 0.59868200  | 1.25179100  |
| C | -6.93705300 | 1.31410500  | 1.10255000  |
| H | -8.23388000 | 2.35208300  | -0.27796500 |
| H | -6.72188500 | 1.98313700  | -2.22053500 |
| H | -4.61395500 | 0.74643700  | -1.93448600 |
| H | -5.49314300 | 0.21185900  | 2.24147000  |
| H | -7.58344900 | 1.48218300  | 1.96203400  |
| C | -2.50597300 | 3.25629600  | -1.09792400 |
| C | -2.24397000 | 4.23190400  | 1.16498000  |
| C | -3.03685200 | 4.34180000  | -0.14286200 |
| H | -1.54082300 | 3.56424700  | -1.51989800 |
| H | -2.62428000 | 4.93827800  | 1.90897100  |
| B | -2.34266500 | 1.86892400  | 0.87542500  |
| O | -2.31114100 | 1.98318900  | -0.47572500 |
| O | -2.35507100 | 2.92450800  | 1.73787900  |
| H | -3.20833700 | 3.10285100  | -1.92350400 |
| H | -1.18116300 | 4.45335100  | 0.99461600  |
| C | -2.78764100 | 5.71738400  | -0.77513700 |
| H | -1.71965700 | 5.89879900  | -0.94624600 |
| H | -3.30309200 | 5.79821800  | -1.73903400 |
| H | -3.16952100 | 6.51583800  | -0.12895300 |
| C | -4.53580800 | 4.15566200  | 0.14093100  |
| H | -4.88779800 | 4.93517200  | 0.82727200  |
| H | -5.11556800 | 4.22855900  | -0.78374500 |
| H | -4.76038600 | 3.18494800  | 0.58663400  |
| H | -8.23161200 | -1.33149300 | -3.39614300 |
| H | -9.77407300 | -1.34345700 | -2.38511100 |

**im9b**

SCF Energy (a.u.) = -1887.122164

Thermal correction to Gibbs free energy (a.u.) = 0.663798

Charge = 0, Multiplicity = 1

|    |             |             |             |
|----|-------------|-------------|-------------|
| Ni | -3.15400100 | -0.36833800 | -0.25461700 |
|----|-------------|-------------|-------------|

|   |             |             |             |
|---|-------------|-------------|-------------|
| C | -4.06784300 | 2.62692600  | -1.26871500 |
| C | -4.66210900 | 2.44862900  | -0.00877500 |
| C | -4.55603500 | 3.41377100  | 0.98418000  |
| C | -3.85655200 | 4.61388200  | 0.75412800  |
| C | -3.30149600 | 4.80778400  | -0.52027200 |
| C | -3.40630700 | 3.83322800  | -1.51189400 |
| H | -5.20498600 | 1.53119400  | 0.18897900  |
| H | -5.02878900 | 3.23978400  | 1.94630800  |
| H | -2.76981000 | 5.73283900  | -0.73033500 |
| H | -2.94204900 | 3.99906600  | -2.48069300 |
| C | -3.69333000 | 5.65819500  | 1.77459500  |
| C | -4.07915900 | 5.60841200  | 3.05585900  |
| H | -3.19267900 | 6.56014400  | 1.42257900  |
| H | -3.90534600 | 6.44559000  | 3.72446500  |
| H | -4.57632100 | 4.74357700  | 3.48655000  |
| C | 1.08451800  | 0.76788500  | -0.95525200 |
| C | 0.10782600  | 1.51195800  | -0.29836400 |
| C | -1.24706000 | 1.43306100  | -0.65032300 |
| C | -1.67863700 | 0.57508200  | -1.69341200 |
| C | -0.67688000 | -0.21498200 | -2.31840000 |
| C | 0.65813900  | -0.10484200 | -1.97820600 |
| H | 0.40200400  | 2.19075700  | 0.49901300  |
| H | -1.94824100 | 2.09483300  | -0.16184900 |
| H | -0.97822600 | -0.90044000 | -3.10611300 |
| H | 1.38492400  | -0.70170000 | -2.51956100 |
| C | -3.09997100 | 0.35470300  | -2.01770200 |
| C | -4.07082400 | 1.51531400  | -2.28869800 |
| H | -3.20881400 | -0.38849900 | -2.80980700 |
| H | -5.07301600 | 1.07613300  | -2.35705800 |
| H | -3.84465900 | 1.94233500  | -3.27712500 |
| C | 3.45901300  | -0.26022000 | -0.76605000 |
| C | 2.54459600  | 0.97035300  | -0.60793700 |
| H | 2.95033600  | 1.77188700  | -1.24210300 |
| H | 2.60520700  | 1.33873600  | 0.42282000  |

|    |             |             |             |
|----|-------------|-------------|-------------|
| H  | 3.34126000  | -0.63260400 | -1.79024100 |
| C  | 4.94037500  | 0.07173200  | -0.60434000 |
| C  | 5.40688900  | 1.25550800  | -0.02605300 |
| C  | 5.88460300  | -0.87528500 | -1.02602200 |
| C  | 6.77564800  | 1.49735500  | 0.12859400  |
| H  | 4.71028700  | 2.01445800  | 0.31259000  |
| C  | 7.25186000  | -0.65573100 | -0.88497000 |
| H  | 5.54065000  | -1.80923500 | -1.46291600 |
| C  | 7.67794600  | 0.53631400  | -0.30470800 |
| H  | 7.12372700  | 2.42040700  | 0.57799500  |
| H  | 7.96974300  | -1.39647100 | -1.21816000 |
| Br | 9.59677400  | 0.86240900  | -0.09638400 |
| C  | 2.51191300  | -3.54989400 | 1.89484500  |
| C  | 2.29415500  | -3.67474900 | 0.52325000  |
| C  | 2.57941700  | -2.60646400 | -0.32965600 |
| C  | 3.08355800  | -1.40230600 | 0.17126100  |
| C  | 3.28886800  | -1.28416700 | 1.55175100  |
| C  | 3.00592100  | -2.34708800 | 2.40760400  |
| H  | 2.29364600  | -4.37959300 | 2.56075000  |
| H  | 1.90094800  | -4.60121800 | 0.11510700  |
| H  | 2.41308100  | -2.71262100 | -1.39838900 |
| H  | 3.70216100  | -0.36310400 | 1.95420200  |
| H  | 3.17919800  | -2.24072900 | 3.47486200  |
| C  | -6.67753600 | -3.20127200 | -1.60810500 |
| C  | -5.34738700 | -3.48755900 | -1.92433400 |
| C  | -4.32968400 | -2.60713900 | -1.55032000 |
| C  | -4.59750300 | -1.42764000 | -0.83138300 |
| C  | -5.94472300 | -1.15033100 | -0.54592600 |
| C  | -6.97176500 | -2.02372500 | -0.92075700 |
| H  | -7.47256300 | -3.88215600 | -1.90020500 |
| H  | -5.10157800 | -4.39631100 | -2.47005100 |
| H  | -3.30300800 | -2.84999300 | -1.81453900 |
| H  | -6.21550300 | -0.24733200 | -0.00205700 |
| H  | -8.00277100 | -1.78014800 | -0.67279200 |

|   |             |             |             |
|---|-------------|-------------|-------------|
| C | -2.35890500 | -3.37332200 | 1.05527100  |
| C | -1.30217800 | -2.68246100 | 0.61297300  |
| C | -0.51419100 | -1.59820400 | 1.29906100  |
| C | -1.22540800 | -0.72101600 | 2.35037600  |
| C | -2.56679700 | -0.12873000 | 1.95673900  |
| C | -3.79120200 | -0.73082700 | 1.96979600  |
| C | -4.17523800 | -2.14091300 | 2.34015600  |
| C | -3.06003500 | -3.20603800 | 2.37728400  |
| H | -2.81234100 | -4.09162400 | 0.37594600  |
| H | -0.93398800 | -2.92293700 | -0.38401100 |
| H | -0.12570400 | -0.94196400 | 0.51937600  |
| H | 0.37369500  | -2.03453500 | 1.77163400  |
| H | -1.33230700 | -1.26884600 | 3.29130500  |
| H | -0.54991300 | 0.11415300  | 2.56899200  |
| H | -2.58049000 | 0.95375700  | 1.83306700  |
| H | -4.65136200 | -0.07446600 | 1.84577100  |
| H | -4.95860400 | -2.46240600 | 1.64467400  |
| H | -4.65314200 | -2.09641300 | 3.33159900  |
| H | -2.34858800 | -2.97896800 | 3.17462200  |
| H | -3.53003400 | -4.15729800 | 2.65461400  |

### TS5b

SCF Energy (a.u.) = -1887.110832

Thermal correction to Gibbs free energy (a.u.) = 0.665709

Charge = 0, Multiplicity = 1

|    |             |             |             |
|----|-------------|-------------|-------------|
| Ni | -2.91720100 | -0.39650700 | -0.11213200 |
| C  | -4.19458700 | 2.46462600  | -1.28038300 |
| C  | -4.86822900 | 2.28166700  | -0.06315500 |
| C  | -4.84003500 | 3.25160700  | 0.93107700  |
| C  | -4.14022900 | 4.45803100  | 0.74660100  |
| C  | -3.50046200 | 4.65552700  | -0.48699000 |
| C  | -3.52841200 | 3.67786600  | -1.47938100 |
| H  | -5.41095900 | 1.36121700  | 0.11492300  |
| H  | -5.37207400 | 3.07101900  | 1.86002700  |

|   |             |             |             |
|---|-------------|-------------|-------------|
| H | -2.96532100 | 5.58535500  | -0.66382400 |
| H | -3.00337000 | 3.84831400  | -2.41580200 |
| C | -4.05842200 | 5.50569000  | 1.77365800  |
| C | -4.51326200 | 5.44369500  | 3.03136300  |
| H | -3.55955700 | 6.41916300  | 1.45019400  |
| H | -4.39675500 | 6.28326500  | 3.70934200  |
| H | -5.01020100 | 4.56521100  | 3.43359800  |
| C | 0.95626700  | 0.65711100  | -0.92619800 |
| C | -0.03863400 | 1.35241600  | -0.25684800 |
| C | -1.40216700 | 1.24181600  | -0.60193500 |
| C | -1.79768400 | 0.39359300  | -1.67578600 |
| C | -0.76591500 | -0.34536900 | -2.32524600 |
| C | 0.55965700  | -0.20971700 | -1.97260200 |
| H | 0.23548500  | 2.03710500  | 0.54258900  |
| H | -2.09277400 | 1.94576200  | -0.16208000 |
| H | -1.03837700 | -1.00334600 | -3.14660500 |
| H | 1.31082300  | -0.75829200 | -2.53398100 |
| C | -3.21108200 | 0.17902900  | -2.09646300 |
| C | -4.14302500 | 1.38440800  | -2.33284700 |
| H | -3.18519900 | -0.37318800 | -3.03380000 |
| H | -5.14800700 | 0.99075700  | -2.52054800 |
| H | -3.81293200 | 1.84103500  | -3.27513200 |
| C | 3.34021700  | -0.30403200 | -0.59417500 |
| C | 2.41466300  | 0.92957900  | -0.62410400 |
| H | 2.80636800  | 1.62094700  | -1.38421200 |
| H | 2.47944600  | 1.45790100  | 0.33393100  |
| H | 3.18249400  | -0.85983600 | -1.52568900 |
| C | 4.82172700  | 0.05956700  | -0.55909100 |
| C | 5.29558000  | 1.31889700  | -0.18040600 |
| C | 5.76026400  | -0.92959200 | -0.88509000 |
| C | 6.66576600  | 1.59346900  | -0.12884500 |
| H | 4.60221700  | 2.11138100  | 0.07925800  |
| C | 7.12912500  | -0.67923800 | -0.84380400 |
| H | 5.41121300  | -1.92004600 | -1.16569800 |

|    |             |             |             |
|----|-------------|-------------|-------------|
| C  | 7.56213200  | 0.58810500  | -0.46293700 |
| H  | 7.01971100  | 2.57487600  | 0.16566500  |
| H  | 7.84269700  | -1.45357300 | -1.10133400 |
| Br | 9.48363700  | 0.95935000  | -0.39849900 |
| C  | 2.52272600  | -3.04937700 | 2.65664800  |
| C  | 2.25744700  | -3.42405200 | 1.34078700  |
| C  | 2.50602300  | -2.53060500 | 0.29655000  |
| C  | 3.01735500  | -1.25536500 | 0.55059000  |
| C  | 3.27370800  | -0.88599800 | 1.87761100  |
| C  | 3.02855200  | -1.77361400 | 2.92257000  |
| H  | 2.33353600  | -3.74277900 | 3.47099300  |
| H  | 1.84969500  | -4.40683800 | 1.12402700  |
| H  | 2.29834000  | -2.82691600 | -0.72858200 |
| H  | 3.69367500  | 0.09381700  | 2.08908400  |
| H  | 3.23867200  | -1.47379200 | 3.94549500  |
| C  | -5.81405300 | -3.56008000 | -1.82629800 |
| C  | -4.42850100 | -3.66014900 | -1.99082200 |
| C  | -3.61397100 | -2.55125200 | -1.78075800 |
| C  | -4.14522600 | -1.31733200 | -1.34678100 |
| C  | -5.54413500 | -1.22505400 | -1.23240600 |
| C  | -6.36469700 | -2.33166400 | -1.45775800 |
| H  | -6.45310900 | -4.42124200 | -1.99832000 |
| H  | -3.98298300 | -4.60476500 | -2.29407300 |
| H  | -2.54241800 | -2.63879100 | -1.93828100 |
| H  | -6.00586100 | -0.29205500 | -0.92622700 |
| H  | -7.44060700 | -2.23184800 | -1.33555600 |
| C  | -1.96280800 | -3.14990800 | 0.97203000  |
| C  | -0.94824100 | -2.27771900 | 0.91633600  |
| C  | -0.54540400 | -1.26209700 | 1.95651700  |
| C  | -1.67409500 | -0.52246300 | 2.71029000  |
| C  | -2.89255700 | -0.09151100 | 1.90233500  |
| C  | -3.98756700 | -0.88245600 | 1.55244500  |
| C  | -4.22214700 | -2.35510900 | 1.82405800  |
| C  | -2.98341100 | -3.24619500 | 2.07082000  |

|   |             |             |            |
|---|-------------|-------------|------------|
| H | -2.11878900 | -3.81127700 | 0.12336100 |
| H | -0.30754600 | -2.30257600 | 0.03855200 |
| H | 0.07741800  | -0.52030900 | 1.45409700 |
| H | 0.11239500  | -1.73855900 | 2.69551100 |
| H | -2.00645200 | -1.12066700 | 3.56630400 |
| H | -1.22845000 | 0.38061500  | 3.14531700 |
| H | -3.08870800 | 0.98060100  | 1.92942500 |
| H | -4.92191100 | -0.35412300 | 1.36391600 |
| H | -4.79215400 | -2.76616800 | 0.98293400 |
| H | -4.88150200 | -2.43939800 | 2.70275200 |
| H | -2.53245500 | -3.00113800 | 3.03578300 |
| H | -3.33486500 | -4.28235200 | 2.15278300 |

**im10b**

SCF Energy (a.u.) = -1887.161223

Thermal correction to Gibbs free energy (a.u.) = 0.668780

Charge = 0, Multiplicity = 1

|    |             |             |             |
|----|-------------|-------------|-------------|
| Ni | -2.67081900 | -1.04309300 | 0.27724800  |
| C  | -4.20119900 | 1.99046600  | -1.58732900 |
| C  | -5.46685000 | 1.74838900  | -1.03325500 |
| C  | -5.93059800 | 2.46930500  | 0.06104800  |
| C  | -5.13760900 | 3.46437000  | 0.65770000  |
| C  | -3.88292200 | 3.72717100  | 0.08367600  |
| C  | -3.42572800 | 3.00936300  | -1.01829700 |
| H  | -6.10340100 | 0.98597800  | -1.47308100 |
| H  | -6.91915800 | 2.25776800  | 0.45643100  |
| H  | -3.25764200 | 4.50692800  | 0.51212500  |
| H  | -2.45519700 | 3.24233400  | -1.44451700 |
| C  | -5.55875200 | 4.22039200  | 1.84492800  |
| C  | -6.59206300 | 3.94298700  | 2.64987200  |
| H  | -4.93391200 | 5.08128800  | 2.08285900  |
| H  | -6.81655500 | 4.56826000  | 3.50828100  |
| H  | -7.24218700 | 3.08682300  | 2.49232300  |
| C  | 1.26470700  | 1.35955100  | -1.28287400 |

|    |             |             |             |
|----|-------------|-------------|-------------|
| C  | 0.21884700  | 1.23090900  | -0.36463700 |
| C  | -1.06022300 | 0.87220000  | -0.78065300 |
| C  | -1.33269500 | 0.60686000  | -2.12710200 |
| C  | -0.29780700 | 0.78504700  | -3.05108500 |
| C  | 0.97929600  | 1.16501000  | -2.63892200 |
| H  | 0.41916100  | 1.37763700  | 0.69309500  |
| H  | -1.86535500 | 0.79580000  | -0.04476100 |
| H  | -0.48763800 | 0.59633900  | -4.10536800 |
| H  | 1.77182800  | 1.27206600  | -3.37647400 |
| C  | -2.68228500 | 0.08171200  | -2.57798400 |
| C  | -3.72060700 | 1.22490400  | -2.79531700 |
| H  | -2.52263500 | -0.30816000 | -3.59483500 |
| H  | -4.58517000 | 0.80564300  | -3.32014100 |
| H  | -3.25266900 | 1.92671100  | -3.49626900 |
| C  | 3.51733800  | 0.27106600  | -0.96230800 |
| C  | 2.68210600  | 1.57063800  | -0.81402800 |
| H  | 3.17051700  | 2.36662900  | -1.39029900 |
| H  | 2.67704100  | 1.88310500  | 0.23622100  |
| H  | 3.50067200  | 0.01558900  | -2.02974500 |
| C  | 4.97979100  | 0.42908500  | -0.56861000 |
| C  | 5.48494700  | 1.55767700  | 0.08214300  |
| C  | 5.86616200  | -0.61880600 | -0.85961600 |
| C  | 6.83555000  | 1.64911200  | 0.43519000  |
| H  | 4.83301400  | 2.38965400  | 0.32424300  |
| C  | 7.21421700  | -0.54964700 | -0.52060200 |
| H  | 5.48808000  | -1.51108800 | -1.35165600 |
| C  | 7.67974800  | 0.59221900  | 0.12699300  |
| H  | 7.21387200  | 2.53070700  | 0.93998200  |
| H  | 7.88737000  | -1.36683600 | -0.75338500 |
| Br | 9.57285600  | 0.70603700  | 0.61429500  |
| C  | 1.62859500  | -3.02410600 | 1.13060500  |
| C  | 1.43662600  | -2.85907300 | -0.24144300 |
| C  | 2.05112900  | -1.79969500 | -0.91100000 |
| C  | 2.86457100  | -0.89170700 | -0.22352500 |

|   |             |             |             |
|---|-------------|-------------|-------------|
| C | 3.04125200  | -1.05940700 | 1.15527900  |
| C | 2.42862700  | -2.11631300 | 1.82827200  |
| H | 1.15170400  | -3.84651900 | 1.65534700  |
| H | 0.81050500  | -3.55452400 | -0.79336300 |
| H | 1.89019900  | -1.66865000 | -1.97722800 |
| H | 3.67970000  | -0.36893300 | 1.69972700  |
| H | 2.57929900  | -2.23464500 | 2.89761400  |
| C | -3.84867800 | -3.87189800 | -1.31018800 |
| C | -2.54294400 | -3.46869000 | -1.16921000 |
| C | -2.15317300 | -2.10402800 | -1.35678100 |
| C | -3.15102400 | -1.13409400 | -1.75661100 |
| C | -4.48729400 | -1.62325800 | -1.95853600 |
| C | -4.83503100 | -2.92938800 | -1.71475700 |
| H | -4.12457100 | -4.91079300 | -1.15137500 |
| H | -1.77369100 | -4.19731000 | -0.92101300 |
| H | -1.09999500 | -1.89492200 | -1.52733300 |
| H | -5.24640200 | -0.94009400 | -2.32495100 |
| H | -5.86165600 | -3.25359400 | -1.86341800 |
| C | -1.97813800 | -2.34021100 | 1.88676800  |
| C | -1.24458800 | -1.18092800 | 1.90665800  |
| C | -1.49269000 | 0.02595700  | 2.78493700  |
| C | -2.98486100 | 0.41770100  | 2.92416500  |
| C | -3.76638900 | 0.22676800  | 1.64011800  |
| C | -4.46460100 | -0.91067800 | 1.28695000  |
| C | -4.53219000 | -2.20855900 | 2.06492900  |
| C | -3.19788500 | -2.63575600 | 2.73691200  |
| H | -1.56607500 | -3.17785800 | 1.33319000  |
| H | -0.29564900 | -1.18790900 | 1.37732200  |
| H | -0.95006700 | 0.87337200  | 2.35001000  |
| H | -1.05380700 | -0.12914100 | 3.78299600  |
| H | -3.44844600 | -0.15074000 | 3.73574500  |
| H | -3.04475300 | 1.47070400  | 3.22283400  |
| H | -3.97103900 | 1.12664200  | 1.07386900  |
| H | -5.19557700 | -0.82207400 | 0.48793000  |

|   |             |             |            |
|---|-------------|-------------|------------|
| H | -4.83375100 | -2.98951900 | 1.35850100 |
| H | -5.32060600 | -2.16083300 | 2.83316000 |
| H | -3.09692900 | -2.15332900 | 3.71325200 |
| H | -3.24357500 | -3.71289900 | 2.93403900 |

**im3c**

SCF Energy (a.u.) = -1897.572019

Thermal correction to Gibbs free energy (a.u.) = 0.599178

Charge = 0, Multiplicity = 1

|   |             |            |             |
|---|-------------|------------|-------------|
| C | 1.34350200  | 2.54003500 | 0.40045500  |
| C | 1.91611700  | 2.08463300 | -0.79548900 |
| C | 3.23885300  | 2.35117900 | -1.11119000 |
| C | 4.05037300  | 3.09393000 | -0.23954800 |
| C | 3.46632900  | 3.58271500 | 0.93554800  |
| C | 2.13921300  | 3.30477200 | 1.25277900  |
| H | 1.31495500  | 1.50575700 | -1.48922400 |
| H | 3.64985600  | 1.98051400 | -2.04228200 |
| H | 4.06613900  | 4.17719100 | 1.61677800  |
| H | 1.71552400  | 3.68721900 | 2.17489700  |
| C | 5.47146500  | 3.35226600 | -0.50590700 |
| C | 6.25394600  | 2.67337400 | -1.34840600 |
| H | 5.91223700  | 4.15602500 | 0.07936600  |
| H | 7.30018000  | 2.92447100 | -1.46556300 |
| H | 5.89127500  | 1.83036200 | -1.92512100 |
| C | -1.14780000 | 2.69727000 | -0.22324900 |
| C | -0.07051700 | 2.16758600 | 0.76046200  |
| H | -0.14611200 | 1.07826000 | 0.78356500  |
| H | -0.29667500 | 2.52094100 | 1.76920300  |
| H | -0.73617000 | 2.59791300 | -1.23230800 |
| C | -2.41058900 | 1.85236000 | -0.19362200 |
| C | -3.24609700 | 1.82388600 | -1.31312100 |
| C | -2.75331800 | 1.05937900 | 0.90283200  |
| C | -4.34887200 | 0.97040200 | -1.37358700 |
| H | -3.02035000 | 2.46119300 | -2.16270600 |

|    |             |             |             |
|----|-------------|-------------|-------------|
| C  | -3.85035900 | 0.20104700  | 0.85804400  |
| H  | -2.15222100 | 1.07885900  | 1.80315300  |
| C  | -4.60847800 | 0.12293200  | -0.30229100 |
| H  | -4.96799900 | 0.95509600  | -2.26303900 |
| H  | -4.07886600 | -0.42097800 | 1.71420200  |
| Br | -7.45146300 | -0.40372300 | 0.80379600  |
| C  | -1.71493200 | 6.92049400  | 0.52432400  |
| C  | -0.71883200 | 6.48413100  | -0.34672300 |
| C  | -0.55922800 | 5.12377800  | -0.60008200 |
| C  | -1.38972000 | 4.17996500  | 0.01153400  |
| C  | -2.38848100 | 4.62732200  | 0.88008800  |
| C  | -2.54979300 | 5.98710200  | 1.13590600  |
| H  | -1.84386900 | 7.97875200  | 0.71985000  |
| H  | -0.06709600 | 7.20216500  | -0.83153000 |
| H  | 0.22163500  | 4.78919900  | -1.27402400 |
| H  | -3.05275100 | 3.90912400  | 1.34647500  |
| H  | -3.33392800 | 6.31775000  | 1.80758600  |
| Ni | -5.79235700 | -1.29333800 | -0.43850200 |
| C  | -4.34705600 | -2.77270000 | -1.03825600 |
| C  | -5.09874200 | -2.26343800 | -2.08063900 |
| H  | -6.00712300 | -2.77164100 | -2.39381400 |
| H  | -4.68531300 | -1.55855000 | -2.79035200 |
| H  | -4.75181900 | -3.61740100 | -0.48292400 |
| C  | -2.95458000 | -2.44197500 | -0.71838900 |
| C  | -2.17440700 | -1.61013700 | -1.53399700 |
| C  | -2.38217700 | -2.93708100 | 0.46041800  |
| C  | -0.88639400 | -1.26527600 | -1.16110000 |
| H  | -2.58332100 | -1.20987500 | -2.45154600 |
| C  | -1.08590200 | -2.59343900 | 0.82642300  |
| H  | -2.96807100 | -3.58414800 | 1.10457700  |
| C  | -0.32024800 | -1.74234000 | 0.02697200  |
| H  | -0.30855700 | -0.60347000 | -1.79764900 |
| H  | -0.66094100 | -2.99189100 | 1.74042900  |
| C  | 2.14923300  | -2.24937700 | -0.30901900 |

|    |            |             |             |
|----|------------|-------------|-------------|
| C  | 1.09061000 | -1.36373700 | 0.39185600  |
| H  | 1.27076000 | -0.32872000 | 0.10080300  |
| H  | 1.22740200 | -1.42658300 | 1.47464000  |
| H  | 1.90881300 | -2.23972500 | -1.37803200 |
| C  | 3.56989700 | -1.71645500 | -0.17183500 |
| C  | 3.90873200 | -0.61451300 | 0.61346900  |
| C  | 4.59158400 | -2.36174500 | -0.87989700 |
| C  | 5.22753900 | -0.16312400 | 0.69859100  |
| H  | 3.15234900 | -0.07194300 | 1.16402000  |
| C  | 5.90984600 | -1.92781300 | -0.81146000 |
| H  | 4.35220400 | -3.22733000 | -1.48810700 |
| C  | 6.20982000 | -0.82829600 | -0.01454300 |
| H  | 5.47053500 | 0.70297100  | 1.29786400  |
| H  | 6.68891900 | -2.43712000 | -1.36295400 |
| Br | 8.05295200 | -0.22290000 | 0.10398400  |
| C  | 1.66830100 | -6.30562500 | 1.10803600  |
| C  | 1.13800100 | -5.92566000 | -0.12200200 |
| C  | 1.31612500 | -4.62374700 | -0.58691600 |
| C  | 2.02636900 | -3.68756400 | 0.16573600  |
| C  | 2.55923000 | -4.07945700 | 1.39724100  |
| C  | 2.38102800 | -5.37724000 | 1.86699300  |
| H  | 1.53280700 | -7.31754100 | 1.47170900  |
| H  | 0.58403500 | -6.64033100 | -0.71988900 |
| H  | 0.88849900 | -4.32714800 | -1.53848200 |
| H  | 3.12634600 | -3.36591900 | 1.98498100  |
| H  | 2.80307100 | -5.66709500 | 2.82254900  |

### TS2c

SCF Energy (a.u.) = -1897.551115

Thermal correction to Gibbs free energy (a.u.) = 0.599178

Charge = 0, Multiplicity = 1

|   |             |            |             |
|---|-------------|------------|-------------|
| C | -7.11304900 | 2.83811400 | -0.30943600 |
| C | -7.65666800 | 3.28156100 | -1.52361900 |
| C | -8.88411500 | 3.93129300 | -1.56930200 |

|    |              |             |             |
|----|--------------|-------------|-------------|
| C  | -9.62017300  | 4.16485800  | -0.39401900 |
| C  | -9.07051700  | 3.72028500  | 0.81900100  |
| C  | -7.84122500  | 3.06838400  | 0.86166400  |
| H  | -7.10538100  | 3.11318300  | -2.44640600 |
| H  | -9.27383600  | 4.26332600  | -2.52671000 |
| H  | -9.62109100  | 3.88648100  | 1.74166700  |
| H  | -7.44925000  | 2.71712600  | 1.81193700  |
| C  | -10.92257100 | 4.84557100  | -0.38156200 |
| C  | -11.59169300 | 5.34063200  | -1.43023000 |
| H  | -11.37078900 | 4.94371000  | 0.60703000  |
| H  | -12.55392800 | 5.82561700  | -1.29982700 |
| H  | -11.21493400 | 5.28570900  | -2.44785700 |
| C  | -6.03699900  | 0.55607000  | -0.55484600 |
| C  | -5.81643000  | 2.06887300  | -0.28626900 |
| H  | -5.13285700  | 2.46466600  | -1.04736800 |
| H  | -5.32918500  | 2.19273300  | 0.68741700  |
| H  | -6.58020400  | 0.48348100  | -1.50620400 |
| C  | -4.74786200  | -0.23742900 | -0.70984400 |
| C  | -4.82816900  | -1.54646600 | -1.21001700 |
| C  | -3.48923500  | 0.26312000  | -0.35621200 |
| C  | -3.69328100  | -2.33978100 | -1.35185000 |
| H  | -5.80062500  | -1.94892600 | -1.48244600 |
| C  | -2.33877700  | -0.51772400 | -0.49160400 |
| H  | -3.39117100  | 1.27233200  | 0.02918000  |
| C  | -2.44399400  | -1.83960300 | -0.94703500 |
| H  | -3.78100300  | -3.34702100 | -1.74964000 |
| H  | -1.37123500  | -0.10811300 | -0.21568200 |
| Br | -0.62651400  | -4.42221200 | 1.59827600  |
| C  | -8.60348000  | -1.04220300 | 2.54511600  |
| C  | -9.13364600  | -0.70115700 | 1.30063700  |
| C  | -8.29938400  | -0.20844300 | 0.29642000  |
| C  | -6.92827200  | -0.05088000 | 0.52025000  |
| C  | -6.40399100  | -0.39827300 | 1.77143700  |
| C  | -7.23466800  | -0.88915000 | 2.77790700  |

|    |              |             |             |
|----|--------------|-------------|-------------|
| H  | -9.25036200  | -1.42788600 | 3.32794500  |
| H  | -10.19716400 | -0.81490400 | 1.11013400  |
| H  | -8.71801600  | 0.07595700  | -0.66524700 |
| H  | -5.33791200  | -0.29275000 | 1.95427400  |
| H  | -6.81194100  | -1.15820300 | 3.74185800  |
| Ni | -1.27972300  | -3.04987200 | -0.12083200 |
| C  | 0.24197600   | -3.03142300 | -1.34939500 |
| C  | -0.87203600  | -2.57464400 | -2.11599400 |
| H  | -1.40266700  | -3.30085500 | -2.72530900 |
| H  | -0.84633500  | -1.58189400 | -2.54982100 |
| H  | 0.49363300   | -4.08890700 | -1.40456500 |
| C  | 1.31985700   | -2.15527900 | -0.85818100 |
| C  | 1.33342600   | -0.76554500 | -1.06747400 |
| C  | 2.38058400   | -2.72657000 | -0.13452600 |
| C  | 2.36825100   | 0.01767300  | -0.56600700 |
| H  | 0.53706900   | -0.28739800 | -1.62922100 |
| C  | 3.41176600   | -1.94005900 | 0.36160600  |
| H  | 2.37237200   | -3.79511600 | 0.05714500  |
| C  | 3.42239300   | -0.55374300 | 0.15733500  |
| H  | 2.36115500   | 1.09102800  | -0.74145100 |
| H  | 4.22753000   | -2.40484900 | 0.90694500  |
| C  | 5.65900100   | 0.46580400  | -0.46009800 |
| C  | 4.57225300   | 0.29532600  | 0.63558000  |
| H  | 4.20890900   | 1.28779500  | 0.92759700  |
| H  | 5.02432900   | -0.16239400 | 1.52236200  |
| H  | 5.15102100   | 0.87676000  | -1.34242700 |
| C  | 6.76283300   | 1.44315200  | -0.08107500 |
| C  | 6.95886800   | 1.91717400  | 1.21877100  |
| C  | 7.64557500   | 1.87239900  | -1.08291500 |
| C  | 8.00255500   | 2.79828200  | 1.52027700  |
| H  | 6.29832600   | 1.60844600  | 2.02160200  |
| C  | 8.68946200   | 2.75091200  | -0.80740400 |
| H  | 7.51775500   | 1.50147100  | -2.09656900 |
| C  | 8.85182700   | 3.20242600  | 0.50009600  |

|    |             |             |             |
|----|-------------|-------------|-------------|
| H  | 8.14339800  | 3.15832100  | 2.53301900  |
| H  | 9.36278300  | 3.07584300  | -1.59236400 |
| Br | 10.31524700 | 4.43755000  | 0.90626500  |
| C  | 7.15534400  | -3.45786100 | -1.51504400 |
| C  | 6.22037400  | -2.82034400 | -2.33063500 |
| C  | 5.76013900  | -1.54466500 | -2.00128500 |
| C  | 6.22671000  | -0.88929700 | -0.85783400 |
| C  | 7.17016700  | -1.53402700 | -0.04860600 |
| C  | 7.62985000  | -2.80978800 | -0.37205800 |
| H  | 7.51475000  | -4.45114700 | -1.76819500 |
| H  | 5.84545100  | -3.31578900 | -3.22188100 |
| H  | 5.01634400  | -1.05822300 | -2.62699700 |
| H  | 7.55169100  | -1.02839700 | 0.83440600  |
| H  | 8.36215900  | -3.29694600 | 0.26571400  |

**im4c**

SCF Energy (a.u.) = -1897.587197

Thermal correction to Gibbs free energy (a.u.) = 0.604134

Charge = 0, Multiplicity = 1

|   |              |            |             |
|---|--------------|------------|-------------|
| C | -6.96216600  | 2.53767800 | -0.21317100 |
| C | -7.84893800  | 3.05317600 | -1.16910600 |
| C | -9.09944800  | 3.53745500 | -0.80469600 |
| C | -9.51331900  | 3.52505600 | 0.53915700  |
| C | -8.62064200  | 3.00897800 | 1.49214900  |
| C | -7.36902300  | 2.52323500 | 1.12439600  |
| H | -7.55068300  | 3.07447000 | -2.21527400 |
| H | -9.76001300  | 3.93185200 | -1.57075800 |
| H | -8.91787400  | 2.98593300 | 2.53766000  |
| H | -6.70625400  | 2.11126500 | 1.87999400  |
| C | -10.82291800 | 4.02298700 | 0.98286700  |
| C | -11.79034000 | 4.55435400 | 0.22508400  |
| H | -10.99855100 | 3.93684400 | 2.05502500  |
| H | -12.72392900 | 4.88936100 | 0.66586800  |
| H | -11.69484200 | 4.67750400 | -0.85021000 |

|    |             |             |             |
|----|-------------|-------------|-------------|
| C  | -5.77837300 | 0.45972100  | -1.04651100 |
| C  | -5.63953100 | 1.94795200  | -0.63357300 |
| H  | -5.23091900 | 2.51378500  | -1.48006300 |
| H  | -4.92043300 | 2.02344500  | 0.18992500  |
| H  | -6.54017900 | 0.41678200  | -1.83643800 |
| C  | -4.50430700 | -0.14883200 | -1.60642800 |
| C  | -4.58203100 | -1.44382200 | -2.17590600 |
| C  | -3.26048700 | 0.46252800  | -1.52150800 |
| C  | -3.44938300 | -2.12464300 | -2.57431100 |
| H  | -5.55376800 | -1.92359300 | -2.24916000 |
| C  | -2.08630200 | -0.21717000 | -1.92154200 |
| H  | -3.16361500 | 1.46355900  | -1.11770200 |
| C  | -2.16416500 | -1.53868000 | -2.43215500 |
| H  | -3.52736900 | -3.13072700 | -2.97662700 |
| H  | -1.13957000 | 0.31295400  | -1.91377500 |
| Br | -1.75862900 | -2.51067100 | 1.76657900  |
| C  | -7.22981300 | -1.86095100 | 2.31036400  |
| C  | -8.11227500 | -1.43747500 | 1.31550100  |
| C  | -7.63965200 | -0.70453500 | 0.22600300  |
| C  | -6.28306200 | -0.38299400 | 0.11959200  |
| C  | -5.40547400 | -0.80835200 | 1.12473700  |
| C  | -5.87282900 | -1.54533500 | 2.21172600  |
| H  | -7.59573100 | -2.43802000 | 3.15488500  |
| H  | -9.16983000 | -1.67658800 | 1.38529500  |
| H  | -8.33085400 | -0.36336100 | -0.54015300 |
| H  | -4.34518500 | -0.58215800 | 1.05945500  |
| H  | -5.16956800 | -1.88039300 | 2.96826700  |
| Ni | -1.75507400 | -1.69786500 | -0.37699300 |
| C  | -0.23981400 | -2.42084700 | -1.31542000 |
| C  | -0.87965800 | -2.31682900 | -2.70351500 |
| H  | -1.12657700 | -3.30870400 | -3.09170700 |
| H  | -0.24480900 | -1.81943500 | -3.44456000 |
| H  | -0.17909000 | -3.43884200 | -0.92738700 |
| C  | 0.94130100  | -1.60430100 | -0.96453300 |

|    |             |             |             |
|----|-------------|-------------|-------------|
| C  | 1.41437000  | -0.53895400 | -1.75208600 |
| C  | 1.62862600  | -1.88305600 | 0.23420800  |
| C  | 2.51910600  | 0.21122500  | -1.35577000 |
| H  | 0.92863500  | -0.29270800 | -2.69108300 |
| C  | 2.73017200  | -1.13471500 | 0.62263600  |
| H  | 1.26691200  | -2.68499600 | 0.87006400  |
| C  | 3.19451500  | -0.07019700 | -0.16350300 |
| H  | 2.86598400  | 1.02665500  | -1.98684700 |
| H  | 3.24966200  | -1.38306800 | 1.54345700  |
| C  | 5.70759300  | 0.10980500  | -0.43829300 |
| C  | 4.43156900  | 0.70089300  | 0.21992500  |
| H  | 4.33157100  | 1.74871400  | -0.08778300 |
| H  | 4.55074000  | 0.68900000  | 1.30906900  |
| H  | 5.52191600  | 0.09582000  | -1.52030200 |
| C  | 6.95962700  | 0.94435800  | -0.20814900 |
| C  | 7.03683100  | 1.97312700  | 0.73443000  |
| C  | 8.10437900  | 0.65143800  | -0.96382800 |
| C  | 8.21835100  | 2.69769500  | 0.92320400  |
| H  | 6.17376700  | 2.22955800  | 1.33900100  |
| C  | 9.29034000  | 1.36047500  | -0.79582700 |
| H  | 8.06730900  | -0.15617400 | -1.69033100 |
| C  | 9.32754100  | 2.37961100  | 0.15267400  |
| H  | 8.26457800  | 3.49323500  | 1.65812300  |
| H  | 10.16667900 | 1.12423900  | -1.38857500 |
| Br | 10.98763300 | 3.38713100  | 0.40358500  |
| C  | 6.13575400  | -3.99407600 | 0.87381700  |
| C  | 5.59812700  | -3.71057500 | -0.38175100 |
| C  | 5.48677300  | -2.38772500 | -0.81194700 |
| C  | 5.91041500  | -1.33295600 | 0.00220200  |
| C  | 6.45484500  | -1.62718400 | 1.25816000  |
| C  | 6.56492300  | -2.94716600 | 1.69306300  |
| H  | 6.22228800  | -5.02266500 | 1.21205500  |
| H  | 5.26092000  | -4.51764800 | -1.02615800 |
| H  | 5.04790300  | -2.16801300 | -1.78167400 |

|   |            |             |            |
|---|------------|-------------|------------|
| H | 6.80106900 | -0.81668600 | 1.89389700 |
| H | 6.98938400 | -3.15935600 | 2.67041500 |

**im5c**

SCF Energy (a.u.) = -2038.629708

Thermal correction to Gibbs free energy (a.u.) = 0.668952

Charge = 0, Multiplicity = 1

|   |             |             |             |
|---|-------------|-------------|-------------|
| C | 7.08849000  | 2.44450500  | 0.20892400  |
| C | 8.06728600  | 2.88504200  | 1.11119300  |
| C | 9.31478100  | 3.30988200  | 0.67045700  |
| C | 9.63338000  | 3.31060500  | -0.69921200 |
| C | 8.64917700  | 2.86961000  | -1.59821200 |
| C | 7.40056500  | 2.44347000  | -1.15400200 |
| H | 7.84377400  | 2.89477900  | 2.17596900  |
| H | 10.04788800 | 3.64732800  | 1.39671800  |
| H | 8.87147800  | 2.85851600  | -2.66240700 |
| H | 6.66437500  | 2.08971400  | -1.87014800 |
| C | 10.93508700 | 3.74787400  | -1.22280100 |
| C | 11.98162500 | 4.20397700  | -0.52333200 |
| H | 11.03049200 | 3.68199000  | -2.30650000 |
| H | 12.89972800 | 4.49933300  | -1.02130700 |
| H | 11.96843400 | 4.30224800  | 0.55865800  |
| C | 5.85008900  | 0.41325300  | 1.07563700  |
| C | 5.76694300  | 1.91715900  | 0.70807500  |
| H | 5.44934400  | 2.47995200  | 1.59464200  |
| H | 4.99830100  | 2.05478400  | -0.06063000 |
| H | 6.66962000  | 0.30460100  | 1.79821700  |
| C | 4.58869900  | -0.14098700 | 1.71390200  |
| C | 4.64595300  | -1.43913900 | 2.27561400  |
| C | 3.36143300  | 0.50676000  | 1.67424600  |
| C | 3.50163900  | -2.09876000 | 2.67738900  |
| H | 5.60689300  | -1.94332700 | 2.32952700  |
| C | 2.17652200  | -0.15361300 | 2.07841900  |
| H | 3.28207400  | 1.51639700  | 1.28747100  |

|    |             |             |             |
|----|-------------|-------------|-------------|
| C  | 2.22812000  | -1.48847800 | 2.54563000  |
| H  | 3.56130400  | -3.11211900 | 3.06494700  |
| H  | 1.23888500  | 0.39367600  | 2.08717700  |
| C  | 6.88131700  | -1.92025800 | -2.42993700 |
| C  | 7.86425900  | -1.57118600 | -1.50304800 |
| C  | 7.52640100  | -0.83083800 | -0.36890300 |
| C  | 6.20611100  | -0.42756800 | -0.14751800 |
| C  | 5.22656300  | -0.77749700 | -1.08668200 |
| C  | 5.55977500  | -1.52086400 | -2.21795300 |
| H  | 7.14197400  | -2.50230600 | -3.30945600 |
| H  | 8.89576800  | -1.87406600 | -1.66035400 |
| H  | 8.29659100  | -0.54929100 | 0.34430800  |
| H  | 4.19011500  | -0.48985900 | -0.93669700 |
| H  | 4.78034500  | -1.79139000 | -2.92405400 |
| Ni | 1.83686000  | -1.54201200 | 0.44325800  |
| C  | 0.34012600  | -2.33930300 | 1.33701200  |
| C  | 0.93285700  | -2.26499300 | 2.75271300  |
| H  | 1.16113700  | -3.26487800 | 3.13334600  |
| H  | 0.27363000  | -1.77990800 | 3.48104700  |
| H  | 0.28728000  | -3.35600600 | 0.93943900  |
| C  | -0.86307100 | -1.54497900 | 0.98856700  |
| C  | -1.37850400 | -0.51115400 | 1.78891800  |
| C  | -1.51874700 | -1.80677100 | -0.23086200 |
| C  | -2.49410700 | 0.22295500  | 1.38734900  |
| H  | -0.91422800 | -0.27091900 | 2.74056400  |
| C  | -2.62960000 | -1.07583300 | -0.62556100 |
| H  | -1.12267200 | -2.58291300 | -0.87864700 |
| C  | -3.13897500 | -0.04396100 | 0.17649200  |
| H  | -2.87156000 | 1.01532600  | 2.03070200  |
| H  | -3.12318400 | -1.31306200 | -1.56388200 |
| C  | -5.66187400 | 0.06958900  | 0.41107100  |
| C  | -4.38924200 | 0.70334200  | -0.21283800 |
| H  | -4.32165000 | 1.74728000  | 0.11679800  |
| H  | -4.49066800 | 0.71113800  | -1.30408800 |

|    |              |             |             |
|----|--------------|-------------|-------------|
| H  | -5.49150700  | 0.03451200  | 1.49506400  |
| C  | -6.92922700  | 0.88071200  | 0.18203100  |
| C  | -7.01811800  | 1.92429300  | -0.74323700 |
| C  | -8.07610600  | 0.55053400  | 0.91894500  |
| C  | -8.21268300  | 2.62682800  | -0.93330600 |
| H  | -6.15353600  | 2.20935200  | -1.33257900 |
| C  | -9.27521500  | 1.23691400  | 0.74951300  |
| H  | -8.02976800  | -0.26861200 | 1.63189700  |
| C  | -9.32337300  | 2.27142600  | -0.18155000 |
| H  | -8.26770100  | 3.43422600  | -1.65458900 |
| H  | -10.15294100 | 0.97179200  | 1.32784200  |
| Br | -11.00247700 | 3.24779300  | -0.43471800 |
| C  | -5.98322800  | -4.01209500 | -0.99899400 |
| C  | -5.44693200  | -3.74354000 | 0.26054200  |
| C  | -5.36959000  | -2.42889100 | 0.72176100  |
| C  | -5.82633600  | -1.36685600 | -0.06486100 |
| C  | -6.36762400  | -1.64623800 | -1.32551000 |
| C  | -6.44408400  | -2.95813300 | -1.79136200 |
| H  | -6.04433700  | -5.03457600 | -1.36082900 |
| H  | -5.08421500  | -4.55594000 | 0.88414800  |
| H  | -4.93069400  | -2.22003600 | 1.69369800  |
| H  | -6.73831400  | -0.83066600 | -1.94056900 |
| H  | -6.86761200  | -3.15843000 | -2.77172800 |
| O  | 1.73709000   | -1.98805600 | -1.26632000 |
| C  | 1.98635700   | -3.28572000 | -1.74153600 |
| C  | 1.87137100   | -3.30561900 | -3.26448100 |
| H  | 1.25747700   | -4.00237700 | -1.32023700 |
| H  | 2.98974500   | -3.64240300 | -1.44778900 |
| H  | 2.06235500   | -4.31001200 | -3.66280100 |
| H  | 0.86946100   | -2.98710000 | -3.57222800 |
| H  | 2.59430800   | -2.61145100 | -3.70840500 |

**im6c**

SCF Energy (a.u.) = -2642.348983

Thermal correction to Gibbs free energy (a.u.) = 0.899610

Charge = 0, Multiplicity = 1

|   |              |             |             |
|---|--------------|-------------|-------------|
| C | -8.36626700  | -1.08572900 | -1.61902900 |
| C | -8.99494500  | -2.19097700 | -2.21050700 |
| C | -10.32556500 | -2.49175500 | -1.94588400 |
| C | -11.08480700 | -1.69386600 | -1.07182400 |
| C | -10.45084900 | -0.58901700 | -0.48105500 |
| C | -9.11778300  | -0.28974300 | -0.74804400 |
| H | -8.42780200  | -2.82287500 | -2.89064200 |
| H | -10.78048700 | -3.35363100 | -2.42459900 |
| H | -11.01561600 | 0.04237500  | 0.20070900  |
| H | -8.64833800  | 0.56159100  | -0.26369100 |
| C | -12.49433700 | -1.96268800 | -0.75501400 |
| C | -13.26097700 | -2.95301500 | -1.22863800 |
| H | -12.94029700 | -1.25956000 | -0.05155700 |
| H | -14.29681700 | -3.05350600 | -0.92015700 |
| H | -12.89509700 | -3.69407700 | -1.93396300 |
| C | -5.99939200  | -1.56269500 | -0.84711300 |
| C | -6.90348200  | -0.81396700 | -1.86396500 |
| H | -6.62220400  | -1.12835800 | -2.87587300 |
| H | -6.71111700  | 0.26208900  | -1.79407000 |
| H | -6.29591100  | -2.61829100 | -0.88130700 |
| C | -4.51890600  | -1.49342500 | -1.18829800 |
| C | -3.67947800  | -2.55403300 | -0.81812600 |
| C | -3.93421700  | -0.38260900 | -1.80516100 |
| C | -2.30528500  | -2.49614900 | -1.03935200 |
| H | -4.11365400  | -3.43205100 | -0.34484700 |
| C | -2.55638900  | -0.31604500 | -2.00889700 |
| H | -4.54951100  | 0.45682400  | -2.11110100 |
| C | -1.71704600  | -1.36524700 | -1.62237300 |
| H | -1.67684400  | -3.33393400 | -0.74406900 |
| H | -2.11480500  | 0.57960500  | -2.43458500 |
| C | -6.80220000  | -0.12382800 | 3.16373500  |
| C | -7.22715200  | -1.39434200 | 2.77450100  |

|    |             |             |             |
|----|-------------|-------------|-------------|
| C  | -6.95757400 | -1.85934300 | 1.48568900  |
| C  | -6.26132500 | -1.06622800 | 0.56946700  |
| C  | -5.84353400 | 0.21061800  | 0.96691800  |
| C  | -6.10893700 | 0.67747400  | 2.25322800  |
| H  | -7.00786900 | 0.23859100  | 4.16708800  |
| H  | -7.77138700 | -2.02518600 | 3.47205700  |
| H  | -7.30296500 | -2.84432800 | 1.18238500  |
| H  | -5.28389000 | 0.83956200  | 0.28310800  |
| H  | -5.76468900 | 1.66649500  | 2.54434900  |
| Ni | -0.60903500 | 0.32336000  | 0.54640400  |
| C  | 0.41461700  | -0.99927600 | -0.36929700 |
| C  | -0.21504900 | -1.23410700 | -1.74290500 |
| H  | 0.21545200  | -2.13474600 | -2.21004000 |
| H  | 0.00977300  | -0.38803600 | -2.39633900 |
| H  | 0.19900600  | -1.84917300 | 0.29727600  |
| C  | 1.85206000  | -0.65012600 | -0.30377600 |
| C  | 2.55291900  | -0.05992000 | -1.37002700 |
| C  | 2.55948800  | -0.85343300 | 0.89726700  |
| C  | 3.89000800  | 0.30813300  | -1.23567900 |
| H  | 2.04336900  | 0.13186100  | -2.30763700 |
| C  | 3.89203100  | -0.48333500 | 1.02915900  |
| H  | 2.04131300  | -1.30670000 | 1.73973500  |
| C  | 4.58370100  | 0.10549300  | -0.03791900 |
| H  | 4.40447900  | 0.76560000  | -2.07862600 |
| H  | 4.41521600  | -0.67322600 | 1.96264000  |
| C  | 6.94061600  | -0.71151000 | -0.48976100 |
| C  | 6.05166900  | 0.43270600  | 0.06805800  |
| H  | 6.27482300  | 1.35096400  | -0.48900200 |
| H  | 6.31660600  | 0.61371300  | 1.11620500  |
| H  | 6.60702000  | -0.88803300 | -1.52065900 |
| C  | 8.42219500  | -0.36890500 | -0.55038100 |
| C  | 8.98310700  | 0.73656100  | 0.09488800  |
| C  | 9.27569700  | -1.21708900 | -1.27129100 |
| C  | 10.35550900 | 0.99855000  | 0.02687900  |

|    |             |             |             |
|----|-------------|-------------|-------------|
| H  | 8.35627100  | 1.41593100  | 0.66193800  |
| C  | 10.64403000 | -0.97573800 | -1.35580300 |
| H  | 8.85927300  | -2.09008500 | -1.76715700 |
| C  | 11.16462300 | 0.13666800  | -0.69937500 |
| H  | 10.77734000 | 1.85992700  | 0.53213300  |
| H  | 11.29090600 | -1.63908500 | -1.91855600 |
| Br | 13.08839200 | 0.49160000  | -0.80521200 |
| C  | 6.11751000  | -4.30232000 | 1.78692600  |
| C  | 5.49827100  | -4.09313500 | 0.55428000  |
| C  | 5.78684000  | -2.94748500 | -0.18793500 |
| C  | 6.69611700  | -1.99718100 | 0.28768200  |
| C  | 7.31541800  | -2.21719100 | 1.52386600  |
| C  | 7.02798500  | -3.35967100 | 2.26989900  |
| H  | 5.89560500  | -5.19416800 | 2.36632600  |
| H  | 4.78724300  | -4.81920300 | 0.16986700  |
| H  | 5.28569100  | -2.77542100 | -1.13656300 |
| H  | 8.03336600  | -1.49242000 | 1.89816900  |
| H  | 7.51901100  | -3.51670000 | 3.22647700  |
| O  | -0.24897600 | 1.69247200  | -0.56731800 |
| C  | 0.79340000  | 2.55152700  | -0.17389200 |
| C  | 1.16168600  | 3.46891100  | -1.33841200 |
| H  | 1.69074400  | 1.98453700  | 0.11928900  |
| H  | 0.49449500  | 3.16262900  | 0.69797900  |
| H  | 1.93566800  | 4.18946700  | -1.04560200 |
| H  | 1.53470100  | 2.87518900  | -2.17993100 |
| H  | 0.28109900  | 4.02520100  | -1.68296400 |
| C  | -0.90584300 | -0.69672400 | 3.38229400  |
| C  | -1.78163600 | -0.97607800 | 2.31657000  |
| C  | -2.44748000 | 0.07331800  | 1.65952100  |
| C  | -2.17811500 | 1.42484800  | 2.01765100  |
| C  | -1.30334000 | 1.66662500  | 3.09173300  |
| C  | -0.69086700 | 0.61883700  | 3.79041700  |
| H  | -0.39915600 | -1.51423500 | 3.88756600  |
| H  | -1.97439300 | -2.00021500 | 2.01422200  |

|   |             |             |             |
|---|-------------|-------------|-------------|
| H | -3.17231300 | -0.14705800 | 0.88590800  |
| H | -1.07800500 | 2.69598300  | 3.35370600  |
| H | -0.01841200 | 0.83187800  | 4.61558800  |
| C | -3.58443600 | 3.25472900  | -1.02272500 |
| C | -2.32071400 | 4.87575000  | 0.34738200  |
| C | -3.59859700 | 4.69273900  | -0.48642400 |
| H | -2.74276800 | 3.10705200  | -1.71050800 |
| H | -2.35163900 | 5.82375800  | 0.89513700  |
| B | -2.62520800 | 2.58792200  | 1.06943500  |
| O | -3.46279600 | 2.29868900  | 0.02951800  |
| O | -2.13306300 | 3.83746400  | 1.31155300  |
| H | -4.51489800 | 3.03196900  | -1.55618300 |
| H | -1.44047400 | 4.88736600  | -0.30638200 |
| C | -3.57737800 | 5.67563600  | -1.66261900 |
| H | -2.70437400 | 5.51207300  | -2.30523500 |
| H | -4.47739300 | 5.56482800  | -2.27839100 |
| H | -3.54545800 | 6.71143400  | -1.30516000 |
| C | -4.84655600 | 4.92272200  | 0.38096200  |
| H | -4.86327800 | 5.94719100  | 0.76982600  |
| H | -5.75882600 | 4.76835600  | -0.20673900 |
| H | -4.87801200 | 4.23804200  | 1.23356500  |

### TS3c

SCF Energy (a.u.) = -2642.342687

Thermal correction to Gibbs free energy (a.u.) = 0.901795

Charge = 0, Multiplicity = 1

|   |              |             |             |
|---|--------------|-------------|-------------|
| C | -8.38603800  | -0.89972800 | -1.67879700 |
| C | -9.05355100  | -1.99832800 | -2.23923700 |
| C | -10.38566200 | -2.26140100 | -1.94365300 |
| C | -11.10715900 | -1.43070400 | -1.06824700 |
| C | -10.43436900 | -0.33257800 | -0.50868100 |
| C | -9.09997900  | -0.07093900 | -0.80669500 |
| H | -8.51599200  | -2.65510900 | -2.91987700 |
| H | -10.87135600 | -3.11916800 | -2.39897200 |

|    |              |             |             |
|----|--------------|-------------|-------------|
| H  | -10.96958400 | 0.32389600  | 0.17321500  |
| H  | -8.60028300  | 0.77627900  | -0.34621500 |
| C  | -12.51624100 | -1.65899800 | -0.71927200 |
| C  | -13.31637700 | -2.63770000 | -1.16059900 |
| H  | -12.93055500 | -0.93332300 | -0.01938200 |
| H  | -14.34799000 | -2.70714500 | -0.83016200 |
| H  | -12.98301400 | -3.39935000 | -1.86009600 |
| C  | -6.01838400  | -1.41606900 | -0.93838700 |
| C  | -6.92201200  | -0.66894800 | -1.95688900 |
| H  | -6.66744700  | -1.01408300 | -2.96587200 |
| H  | -6.70233400  | 0.40322200  | -1.91666300 |
| H  | -6.34169700  | -2.46423600 | -0.94147100 |
| C  | -4.54421700  | -1.39393000 | -1.31103300 |
| C  | -3.73357400  | -2.49055700 | -0.98518800 |
| C  | -3.93599400  | -0.28754700 | -1.91324100 |
| C  | -2.36191000  | -2.47112200 | -1.22951500 |
| H  | -4.18668700  | -3.36641000 | -0.52604900 |
| C  | -2.56241400  | -0.26083400 | -2.14379900 |
| H  | -4.52718400  | 0.58092300  | -2.18235100 |
| C  | -1.74952200  | -1.34452900 | -1.79756800 |
| H  | -1.75607900  | -3.33552600 | -0.96564100 |
| H  | -2.10478800  | 0.63263800  | -2.55608800 |
| C  | -6.69334600  | 0.11585000  | 3.06191800  |
| C  | -7.12504200  | -1.16507000 | 2.71640900  |
| C  | -6.89832100  | -1.65696300 | 1.42943200  |
| C  | -6.23862100  | -0.88122400 | 0.47182100  |
| C  | -5.81283700  | 0.40552500  | 0.82688100  |
| C  | -6.03530600  | 0.89920800  | 2.11114700  |
| H  | -6.86430100  | 0.49919100  | 4.06399800  |
| H  | -7.64093000  | -1.78293700 | 3.44642600  |
| H  | -7.24869700  | -2.65015400 | 1.16009000  |
| H  | -5.26215900  | 1.01710500  | 0.12040100  |
| H  | -5.67868400  | 1.89266500  | 2.36837800  |
| Ni | -0.69081900  | -0.00180500 | 0.52117600  |

|    |             |             |             |
|----|-------------|-------------|-------------|
| C  | 0.41273800  | -1.05866100 | -0.58233100 |
| C  | -0.24551000 | -1.25570300 | -1.94702100 |
| H  | 0.15384200  | -2.15154600 | -2.44870600 |
| H  | -0.01063800 | -0.40112800 | -2.58870700 |
| H  | 0.19331300  | -1.92768600 | 0.08006800  |
| C  | 1.84614200  | -0.71265400 | -0.51560400 |
| C  | 2.56812900  | -0.19837600 | -1.60684800 |
| C  | 2.52727300  | -0.82368500 | 0.71446700  |
| C  | 3.89565600  | 0.20174700  | -1.46588300 |
| H  | 2.08783300  | -0.09850400 | -2.57414200 |
| C  | 3.84983500  | -0.42476000 | 0.85077200  |
| H  | 1.99549800  | -1.22565800 | 1.57445700  |
| C  | 4.55925400  | 0.09992400  | -0.23913700 |
| H  | 4.42652400  | 0.60140300  | -2.32752300 |
| H  | 4.35166900  | -0.53883100 | 1.80759700  |
| C  | 6.94268900  | -0.71153100 | -0.53681900 |
| C  | 6.01750400  | 0.46306300  | -0.11844800 |
| H  | 6.24325400  | 1.32911800  | -0.75237100 |
| H  | 6.24382300  | 0.74686700  | 0.91570800  |
| H  | 6.64859900  | -0.98991200 | -1.55725300 |
| C  | 8.41997800  | -0.34738100 | -0.57857300 |
| C  | 8.93950200  | 0.82561800  | -0.02444600 |
| C  | 9.31203800  | -1.24496100 | -1.18360300 |
| C  | 10.30921900 | 1.10579700  | -0.06993300 |
| H  | 8.28244700  | 1.54472500  | 0.45221600  |
| C  | 10.67852700 | -0.98674600 | -1.24352600 |
| H  | 8.92774400  | -2.16958000 | -1.60644400 |
| C  | 11.15771300 | 0.19355100  | -0.68063500 |
| H  | 10.69884800 | 2.01968600  | 0.36384100  |
| H  | 11.35567200 | -1.68890200 | -1.71637800 |
| Br | 13.07760900 | 0.57304600  | -0.75380100 |
| C  | 6.09539000  | -4.08684200 | 2.04000300  |
| C  | 5.53843200  | -4.02030200 | 0.76262000  |
| C  | 5.83573200  | -2.94426900 | -0.07458100 |

|   |             |             |             |
|---|-------------|-------------|-------------|
| C | 6.69164700  | -1.92310500 | 0.34971800  |
| C | 7.25013700  | -2.00080600 | 1.63127700  |
| C | 6.95344800  | -3.07278700 | 2.47205200  |
| H | 5.86623600  | -4.92367200 | 2.69374200  |
| H | 4.86955300  | -4.80356300 | 0.41686300  |
| H | 5.38306000  | -2.88316500 | -1.06060400 |
| H | 7.92781300  | -1.22041700 | 1.96693900  |
| H | 7.39625500  | -3.11938800 | 3.46321500  |
| O | -0.58360100 | 1.67362000  | -0.20468200 |
| C | 0.63994900  | 2.38877600  | -0.17914300 |
| C | 0.90776000  | 3.01534400  | -1.54347000 |
| H | 1.47349600  | 1.72652500  | 0.08117300  |
| H | 0.58105000  | 3.16213900  | 0.59986900  |
| H | 1.82655300  | 3.61463600  | -1.52549200 |
| H | 1.01996900  | 2.23401400  | -2.30215600 |
| H | 0.07713100  | 3.66410400  | -1.84520900 |
| C | -1.65169600 | -1.13336800 | 3.65045300  |
| C | -2.43741600 | -1.24794900 | 2.50101800  |
| C | -2.64453600 | -0.12761900 | 1.67947800  |
| C | -2.03661400 | 1.11668700  | 1.97998600  |
| C | -1.26018300 | 1.20367700  | 3.15543400  |
| C | -1.07711000 | 0.09953500  | 3.98623100  |
| H | -1.49577300 | -1.99767400 | 4.29027900  |
| H | -2.91150000 | -2.19071500 | 2.24498100  |
| H | -3.29913400 | -0.20636700 | 0.82083700  |
| H | -0.79629500 | 2.15518100  | 3.39843100  |
| H | -0.47583800 | 0.18879300  | 4.88681200  |
| C | -3.27801100 | 3.29061600  | -0.91191600 |
| C | -1.88315000 | 4.69685800  | 0.56564300  |
| C | -3.21655600 | 4.65232500  | -0.20146900 |
| H | -2.47505000 | 3.21860000  | -1.66023600 |
| H | -1.84761400 | 5.58063400  | 1.21365200  |
| B | -2.13257600 | 2.32190400  | 0.94771900  |
| O | -3.15711900 | 2.22192700  | 0.00928700  |

|   |             |            |             |
|---|-------------|------------|-------------|
| O | -1.68068400 | 3.55812200 | 1.39338300  |
| H | -4.23777100 | 3.17343800 | -1.43051900 |
| H | -1.05293500 | 4.77530500 | -0.15006600 |
| C | -3.24254000 | 5.77845100 | -1.23991400 |
| H | -2.42063500 | 5.67922800 | -1.95932200 |
| H | -4.18475900 | 5.77041500 | -1.80065500 |
| H | -3.15188900 | 6.75914700 | -0.75779200 |
| C | -4.39716800 | 4.79037400 | 0.77166200  |
| H | -4.37097200 | 5.76282500 | 1.27727600  |
| H | -5.35175300 | 4.71192800 | 0.23761100  |
| H | -4.37111300 | 4.00910500 | 1.53599600  |

**im7c**

SCF Energy (a.u.) = -2642.373886

Thermal correction to Gibbs free energy (a.u.) = 0.909125

Charge = 0, Multiplicity = 1

|   |              |            |             |
|---|--------------|------------|-------------|
| C | -7.01409700  | 2.44921700 | -1.06354100 |
| C | -7.88696500  | 2.90230500 | -2.06221500 |
| C | -9.20428600  | 3.23553700 | -1.77070600 |
| C | -9.70055200  | 3.12942800 | -0.45950400 |
| C | -8.81989900  | 2.67943000 | 0.53737300  |
| C | -7.50162000  | 2.34519700 | 0.24274000  |
| H | -7.52580500  | 2.99233100 | -3.08475600 |
| H | -9.85353500  | 3.58296600 | -2.56861400 |
| H | -9.18044300  | 2.58565100 | 1.55876500  |
| H | -6.85018000  | 1.97341100 | 1.02810000  |
| C | -11.08343000 | 3.46483500 | -0.09256000 |
| C | -12.05240000 | 3.91787900 | -0.89788100 |
| H | -11.31833100 | 3.31765700 | 0.96150600  |
| H | -13.04425800 | 4.13167300 | -0.51226600 |
| H | -11.90111200 | 4.09304300 | -1.95948900 |
| C | -5.54198800  | 0.54635900 | -1.90304800 |
| C | -5.61010400  | 2.02214800 | -1.40869600 |
| H | -5.21579200  | 2.68550400 | -2.18664000 |

|    |             |             |             |
|----|-------------|-------------|-------------|
| H  | -4.96124000 | 2.12217400  | -0.53177800 |
| H  | -6.11206100 | 0.50303600  | -2.84239200 |
| C  | -4.11651300 | 0.09113000  | -2.21036900 |
| C  | -3.80578000 | -1.27378000 | -2.20224200 |
| C  | -3.08341900 | 0.99721600  | -2.50236500 |
| C  | -2.50461000 | -1.72096800 | -2.43576500 |
| H  | -4.58161900 | -1.99453400 | -1.97163600 |
| C  | -1.78139700 | 0.56314000  | -2.73105400 |
| H  | -3.28336000 | 2.06180500  | -2.52715800 |
| C  | -1.45718100 | -0.80785100 | -2.70264400 |
| H  | -2.29554800 | -2.78736900 | -2.44546600 |
| H  | -0.99747700 | 1.28711300  | -2.93811200 |
| C  | -7.59274200 | -1.89870600 | 1.01258000  |
| C  | -8.22021500 | -1.56631800 | -0.18841900 |
| C  | -7.54299600 | -0.80408900 | -1.14165300 |
| C  | -6.23875500 | -0.36247300 | -0.90344900 |
| C  | -5.61502100 | -0.70065400 | 0.30471200  |
| C  | -6.28674100 | -1.46741600 | 1.25543400  |
| H  | -8.11401400 | -2.49873100 | 1.75349800  |
| H  | -9.23589100 | -1.89809300 | -0.38617900 |
| H  | -8.03949600 | -0.53041800 | -2.06922800 |
| H  | -4.59177400 | -0.39180100 | 0.49357700  |
| H  | -5.77871300 | -1.73983800 | 2.17401700  |
| Ni | -1.00090800 | -1.03878400 | -0.52070800 |
| C  | 0.43433900  | -1.82830500 | -1.52391800 |
| C  | -0.03263300 | -1.31390600 | -2.90079200 |
| H  | -0.00513900 | -2.10174500 | -3.66408900 |
| H  | 0.60154300  | -0.49475000 | -3.25152400 |
| H  | 0.34967000  | -2.91834400 | -1.44733600 |
| C  | 1.75053500  | -1.35189900 | -1.02978400 |
| C  | 2.06976300  | 0.01870600  | -0.99320800 |
| C  | 2.70711800  | -2.25053700 | -0.53117300 |
| C  | 3.27929900  | 0.46300100  | -0.47102600 |
| H  | 1.34529600  | 0.74501000  | -1.35447100 |

|    |             |             |             |
|----|-------------|-------------|-------------|
| C  | 3.91901900  | -1.80451000 | -0.00967100 |
| H  | 2.49604100  | -3.31657200 | -0.55955800 |
| C  | 4.22457600  | -0.44047900 | 0.03425800  |
| H  | 3.49429000  | 1.52934000  | -0.44571100 |
| H  | 4.64711100  | -2.52529700 | 0.35177000  |
| C  | 6.57401500  | 0.24383200  | -0.62612500 |
| C  | 5.56130100  | 0.04635000  | 0.53357400  |
| H  | 5.44083900  | 1.00084200  | 1.06025400  |
| H  | 5.97245600  | -0.67296200 | 1.25080800  |
| H  | 6.09885300  | 0.92890100  | -1.34055000 |
| C  | 7.88642700  | 0.88356400  | -0.19600300 |
| C  | 8.27392200  | 1.02188400  | 1.13951000  |
| C  | 8.76498400  | 1.33800500  | -1.19051200 |
| C  | 9.50074000  | 1.59913300  | 1.48364000  |
| H  | 7.62277800  | 0.68256400  | 1.93760400  |
| C  | 9.98963400  | 1.91818000  | -0.87254600 |
| H  | 8.48701000  | 1.22429300  | -2.23512800 |
| C  | 10.33964400 | 2.03950600  | 0.46999600  |
| H  | 9.78885000  | 1.70043500  | 2.52377100  |
| H  | 10.65754500 | 2.26675600  | -1.65198800 |
| Br | 12.05922500 | 2.85199000  | 0.93631200  |
| C  | 7.11256200  | -3.56299200 | -2.61848900 |
| C  | 6.25196600  | -2.60470100 | -3.15441400 |
| C  | 6.10143400  | -1.36926400 | -2.52345000 |
| C  | 6.80683200  | -1.07311000 | -1.35296200 |
| C  | 7.67189500  | -2.03911400 | -0.82488700 |
| C  | 7.82298800  | -3.27593100 | -1.45055400 |
| H  | 7.23212600  | -4.52553400 | -3.10769700 |
| H  | 5.69414800  | -2.81824600 | -4.06198700 |
| H  | 5.41419900  | -0.63244600 | -2.93070100 |
| H  | 8.23607600  | -1.81544400 | 0.07653700  |
| H  | 8.49951400  | -4.01436800 | -1.02912200 |
| O  | -0.48226600 | -1.24343500 | 1.29308300  |
| C  | 0.35334600  | -2.20416300 | 1.94236300  |

|   |             |             |             |
|---|-------------|-------------|-------------|
| C | 1.42368900  | -1.49931600 | 2.75938800  |
| H | 0.80564100  | -2.83483400 | 1.17352800  |
| H | -0.27982000 | -2.83688400 | 2.57425900  |
| H | 2.07581500  | -2.23439700 | 3.24679700  |
| H | 2.03914200  | -0.86607200 | 2.11348600  |
| H | 0.95677500  | -0.87898700 | 3.52990200  |
| C | -4.47336600 | -4.39625700 | 2.55068500  |
| C | -4.22072900 | -3.49853400 | 3.58936600  |
| C | -3.39350200 | -2.39290700 | 3.37374500  |
| C | -2.78937700 | -2.15487000 | 2.12889200  |
| C | -3.05221200 | -3.08116400 | 1.10626900  |
| C | -3.88470200 | -4.18278500 | 1.30259700  |
| H | -5.12261400 | -5.25319300 | 2.71075100  |
| H | -4.67131500 | -3.65746500 | 4.56637200  |
| H | -3.20345300 | -1.69184100 | 4.18090600  |
| H | -2.60203200 | -2.93344600 | 0.12670600  |
| H | -4.07797600 | -4.87318000 | 0.48485200  |
| C | -2.05010900 | 1.35656700  | 0.71352200  |
| C | -1.34165700 | 1.22043900  | 3.06265000  |
| C | -2.23858100 | 2.00239400  | 2.08939600  |
| H | -1.00921000 | 1.51357500  | 0.38979800  |
| H | -1.42565500 | 1.63701800  | 4.07475200  |
| B | -1.85594500 | -0.86346800 | 1.91038100  |
| O | -2.35021500 | -0.04648600 | 0.71267200  |
| O | -1.71758800 | -0.13389200 | 3.12373100  |
| H | -2.70285500 | 1.82327400  | -0.02970200 |
| H | -0.28966200 | 1.32410100  | 2.74605900  |
| C | -1.77797800 | 3.46210500  | 2.01045400  |
| H | -0.72409000 | 3.53552600  | 1.71458400  |
| H | -2.37430100 | 4.02491100  | 1.28175600  |
| H | -1.88946800 | 3.95627000  | 2.98246800  |
| C | -3.70816700 | 1.92635800  | 2.52892000  |
| H | -3.83652900 | 2.38181000  | 3.51798000  |
| H | -4.35278900 | 2.46701000  | 1.82461700  |

H -4.05316500 0.89182800 2.58596700

#### TS4c

SCF Energy (a.u.) = -2642.323047

Thermal correction to Gibbs free energy (a.u.) = 0.904016

Charge = 0, Multiplicity = 1

C -8.22969100 -2.53423600 -1.11502400  
C -8.81622200 -3.19592100 -0.02632800  
C -10.19556300 -3.23854400 0.13450200  
C -11.04890500 -2.61566600 -0.79352800  
C -10.45721100 -1.95530400 -1.88207600  
C -9.07471200 -1.91400400 -2.04072300  
H -8.17647100 -3.68603000 0.70456500  
H -10.61472800 -3.76314600 0.98766800  
H -11.09525200 -1.46494200 -2.61330900  
H -8.64517200 -1.38149100 -2.88411300  
C -12.51358400 -2.62720600 -0.67486200  
C -13.24770700 -3.20704900 0.28297400  
H -13.03479300 -2.09514200 -1.47059600  
H -14.33145400 -3.14863900 0.26792000  
H -12.80721400 -3.75698300 1.11004200  
C -6.16472700 -1.22566100 -0.42328400  
C -6.72937800 -2.43736600 -1.22768700  
H -6.25983300 -3.35003400 -0.84308800  
H -6.43127400 -2.34205500 -2.27765300  
H -6.53879300 -1.33725400 0.60034000  
C -4.64766500 -1.30813600 -0.33627600  
C -4.03419400 -1.44577900 0.90474200  
C -3.82803300 -1.36827200 -1.48215300  
C -2.65732200 -1.70552700 1.01641100  
H -4.63359400 -1.38030000 1.80798600  
C -2.46501800 -1.59227900 -1.38386200  
H -4.26686000 -1.26828300 -2.46861000  
C -1.85074400 -1.81492600 -0.13478200

|    |             |             |             |
|----|-------------|-------------|-------------|
| H  | -2.24359000 | -1.93131400 | 1.99572900  |
| H  | -1.85953200 | -1.64958300 | -2.28461300 |
| C  | -7.90285600 | 2.47200100  | -1.87971400 |
| C  | -8.20266000 | 1.99193700  | -0.60459900 |
| C  | -7.62528100 | 0.80638400  | -0.15119300 |
| C  | -6.73772500 | 0.07992700  | -0.95124300 |
| C  | -6.46302900 | 0.56008200  | -2.23776800 |
| C  | -7.03390700 | 1.74679300  | -2.69729700 |
| H  | -8.34652900 | 3.39699900  | -2.23641700 |
| H  | -8.88607000 | 2.53939000  | 0.03846100  |
| H  | -7.86272500 | 0.43790100  | 0.84270800  |
| H  | -5.79602600 | 0.01372600  | -2.89525700 |
| H  | -6.79849600 | 2.10512600  | -3.69564400 |
| Ni | -0.95993000 | 0.11808900  | 1.02939200  |
| C  | 0.26730100  | -1.41687700 | 1.10003600  |
| C  | -0.38880100 | -2.22366900 | -0.02869400 |
| H  | -0.31253000 | -3.31159800 | 0.12907500  |
| H  | 0.10258500  | -2.01526900 | -0.98413100 |
| H  | 0.11567900  | -1.91440500 | 2.06754700  |
| C  | 1.69677700  | -1.06909400 | 0.92610000  |
| C  | 2.16813800  | -0.42953600 | -0.23688900 |
| C  | 2.63023600  | -1.30284000 | 1.94982300  |
| C  | 3.50090400  | -0.05712100 | -0.36608700 |
| H  | 1.46730400  | -0.18499000 | -1.03038700 |
| C  | 3.96547600  | -0.92534000 | 1.82167700  |
| H  | 2.30030700  | -1.79885600 | 2.86023800  |
| C  | 4.42578000  | -0.29691600 | 0.66041300  |
| H  | 3.83113400  | 0.44350600  | -1.27440300 |
| H  | 4.66638500  | -1.14309500 | 2.62341700  |
| C  | 6.63903900  | -1.06371600 | -0.30967400 |
| C  | 5.88351800  | 0.04165500  | 0.47617600  |
| H  | 5.98512100  | 0.98814800  | -0.06933800 |
| H  | 6.36037800  | 0.17543000  | 1.45408900  |
| H  | 6.09277900  | -1.20155900 | -1.25191800 |

|    |             |             |             |
|----|-------------|-------------|-------------|
| C  | 8.07045600  | -0.69591300 | -0.67206800 |
| C  | 8.75348400  | 0.38440500  | -0.10673900 |
| C  | 8.75074000  | -1.49351300 | -1.60403200 |
| C  | 10.07710500 | 0.67102600  | -0.45693000 |
| H  | 8.26173600  | 1.02421800  | 0.61774400  |
| C  | 10.06694100 | -1.22687500 | -1.97052300 |
| H  | 8.24027800  | -2.34702200 | -2.04264500 |
| C  | 10.71269900 | -0.14057400 | -1.38555300 |
| H  | 10.59500700 | 1.51239000  | -0.01072200 |
| H  | 10.57904200 | -1.85103000 | -2.69394800 |
| Br | 12.56580900 | 0.24967400  | -1.88803700 |
| C  | 6.34778200  | -4.76067000 | 1.92718600  |
| C  | 5.46774200  | -4.50287200 | 0.87569000  |
| C  | 5.58220600  | -3.32225100 | 0.14121600  |
| C  | 6.57492900  | -2.38468700 | 0.44409200  |
| C  | 7.45524000  | -2.65305200 | 1.49911600  |
| C  | 7.34280700  | -3.83088200 | 2.23706300  |
| H  | 6.26135100  | -5.67965900 | 2.50016600  |
| H  | 4.68818700  | -5.21803000 | 0.62804300  |
| H  | 4.88082900  | -3.11293100 | -0.66180800 |
| H  | 8.23837100  | -1.93810800 | 1.73651400  |
| H  | 8.03552500  | -4.02512800 | 3.05144600  |
| O  | 0.30739400  | 1.46814100  | 1.41774800  |
| C  | 0.89368000  | 1.58863600  | 2.73234900  |
| C  | 2.21501900  | 2.32930600  | 2.63345000  |
| H  | 1.05200800  | 0.56979900  | 3.08785200  |
| H  | 0.19110300  | 2.10378900  | 3.39276600  |
| H  | 2.68334300  | 2.38740500  | 3.62325200  |
| H  | 2.89218900  | 1.80196000  | 1.95646700  |
| H  | 2.05897000  | 3.34842700  | 2.26734300  |
| C  | -5.06009500 | 2.32993600  | 1.51848900  |
| C  | -4.56140700 | 2.24156400  | 0.21671200  |
| C  | -3.23340100 | 1.86827900  | 0.00648300  |
| C  | -2.36204400 | 1.59567700  | 1.07569400  |

|   |             |            |             |
|---|-------------|------------|-------------|
| C | -2.89471300 | 1.70435900 | 2.37719600  |
| C | -4.22606200 | 2.05532400 | 2.60485200  |
| H | -6.09487200 | 2.61813800 | 1.67998400  |
| H | -5.20802300 | 2.46770200 | -0.62429200 |
| H | -2.84732800 | 1.81939600 | -1.00886500 |
| H | -2.24935600 | 1.52184300 | 3.23648700  |
| H | -4.60912900 | 2.13184300 | 3.62022800  |
| C | -0.02689000 | 3.94322300 | -1.09372000 |
| C | -0.29634200 | 4.97995600 | 1.13819200  |
| C | -0.66160700 | 5.12774600 | -0.34608200 |
| H | 1.06831200  | 4.06326800 | -1.09831100 |
| H | -0.85478200 | 5.70609100 | 1.74032600  |
| B | -0.47748900 | 2.56479100 | 0.84955800  |
| O | -0.35157500 | 2.67776500 | -0.53609400 |
| O | -0.57322100 | 3.68886600 | 1.66441900  |
| H | -0.36122500 | 3.93635800 | -2.13795200 |
| H | 0.77632700  | 5.19267600 | 1.27334000  |
| C | -0.06230700 | 6.43389400 | -0.88436400 |
| H | 1.02970000  | 6.45051100 | -0.78496000 |
| H | -0.30717300 | 6.56514700 | -1.94500600 |
| H | -0.46436700 | 7.29840300 | -0.34300200 |
| C | -2.18686500 | 5.14179200 | -0.51900800 |
| H | -2.61602400 | 6.02939800 | -0.03852100 |
| H | -2.45630500 | 5.17047400 | -1.58188000 |
| H | -2.65102000 | 4.26042300 | -0.07560500 |

**im8c**

SCF Energy (a.u.) = -2642.342395

Thermal correction to Gibbs free energy (a.u.) = 0.904301

Charge = 0, Multiplicity = 1

|   |              |             |             |
|---|--------------|-------------|-------------|
| C | -8.41740800  | -2.26061600 | -1.08566800 |
| C | -8.99191800  | -2.93106100 | 0.00445600  |
| C | -10.36169200 | -2.89759300 | 0.23293600  |
| C | -11.21831400 | -2.18644000 | -0.62612100 |

|   |              |             |             |
|---|--------------|-------------|-------------|
| C | -10.63939100 | -1.51833100 | -1.71655200 |
| C | -9.26597100  | -1.55352200 | -1.94303500 |
| H | -8.34977100  | -3.48953400 | 0.68231900  |
| H | -10.77116200 | -3.43137300 | 1.08514300  |
| H | -11.28008400 | -0.96105300 | -2.39574200 |
| H | -8.84654400  | -1.01474500 | -2.78711900 |
| C | -12.67353400 | -2.11549700 | -0.43483800 |
| C | -13.39597300 | -2.69062500 | 0.53468800  |
| H | -13.19806600 | -1.51977000 | -1.18182000 |
| H | -14.47353000 | -2.56675800 | 0.57611700  |
| H | -12.95155100 | -3.30039100 | 1.31646800  |
| C | -6.23229900  | -1.14195000 | -0.42848900 |
| C | -6.92061300  | -2.25821500 | -1.27001100 |
| H | -6.50121200  | -3.22163900 | -0.95797900 |
| H | -6.66313900  | -2.12984600 | -2.32708300 |
| H | -6.57227000  | -1.28548500 | 0.60318500  |
| C | -4.72453200  | -1.33980000 | -0.41557600 |
| C | -4.08838400  | -1.70644900 | 0.76250500  |
| C | -3.94055300  | -1.23684700 | -1.58399400 |
| C | -2.71061300  | -1.99048900 | 0.79467100  |
| H | -4.66496700  | -1.78954300 | 1.67958400  |
| C | -2.58342500  | -1.50322500 | -1.56708300 |
| H | -4.40369800  | -0.93883000 | -2.51789900 |
| C | -1.93236100  | -1.91135600 | -0.38252100 |
| H | -2.27614600  | -2.38696400 | 1.70745800  |
| H | -2.00252400  | -1.42094900 | -2.48217300 |
| C | -7.66971100  | 2.79034800  | -1.56556400 |
| C | -7.76432500  | 2.34647700  | -0.24755500 |
| C | -7.27801400  | 1.08768500  | 0.10376600  |
| C | -6.69757300  | 0.24460100  | -0.84745600 |
| C | -6.61687400  | 0.69828100  | -2.17103100 |
| C | -7.09120800  | 1.95984200  | -2.52755200 |
| H | -8.04715400  | 3.77026900  | -1.84377500 |
| H | -8.21354600  | 2.98029600  | 0.51172400  |

|    |             |             |             |
|----|-------------|-------------|-------------|
| H  | -7.34665100 | 0.75397900  | 1.13522200  |
| H  | -6.20034900 | 0.05966100  | -2.94356600 |
| H  | -7.01775900 | 2.29002300  | -3.56028500 |
| Ni | -1.17374600 | -0.15835200 | 0.93589800  |
| C  | 0.15419900  | -1.66724300 | 0.89237800  |
| C  | -0.46486600 | -2.31016700 | -0.35903700 |
| H  | -0.36176400 | -3.40769600 | -0.38791600 |
| H  | 0.01682600  | -1.93079500 | -1.26657600 |
| H  | -0.00291100 | -2.31975600 | 1.76213300  |
| C  | 1.58137400  | -1.29087900 | 0.80866500  |
| C  | 2.07004900  | -0.44073800 | -0.20540400 |
| C  | 2.50670700  | -1.71643800 | 1.77821200  |
| C  | 3.40110500  | -0.04120200 | -0.23685400 |
| H  | 1.38042700  | -0.05437800 | -0.95064400 |
| C  | 3.84231700  | -1.31937800 | 1.74279900  |
| H  | 2.16797600  | -2.37851600 | 2.57234200  |
| C  | 4.31506500  | -0.47118500 | 0.73646400  |
| H  | 3.74111000  | 0.62536900  | -1.02804300 |
| H  | 4.53389800  | -1.68857500 | 2.49613600  |
| C  | 6.54796500  | -1.01986300 | -0.33576900 |
| C  | 5.77259300  | -0.09667100 | 0.64297200  |
| H  | 5.87544300  | 0.93977900  | 0.29718800  |
| H  | 6.23617800  | -0.15677500 | 1.63459000  |
| H  | 6.00958800  | -0.97811100 | -1.29154300 |
| C  | 7.97626300  | -0.57172100 | -0.60720600 |
| C  | 8.65013700  | 0.36529200  | 0.18114700  |
| C  | 8.66434800  | -1.14306100 | -1.68765500 |
| C  | 9.97186000  | 0.73096700  | -0.09426100 |
| H  | 8.15187700  | 0.82840200  | 1.02574700  |
| C  | 9.97904400  | -0.79347300 | -1.98353300 |
| H  | 8.16125000  | -1.88478900 | -2.30266100 |
| C  | 10.61513900 | 0.14498100  | -1.17497800 |
| H  | 10.48259000 | 1.45918300  | 0.52549600  |
| H  | 10.49718300 | -1.24204300 | -2.82347900 |

|    |             |             |             |
|----|-------------|-------------|-------------|
| Br | 12.46572100 | 0.64971100  | -1.57548100 |
| C  | 6.28649000  | -5.08411400 | 1.13747100  |
| C  | 5.39873800  | -4.62997100 | 0.16156600  |
| C  | 5.50420500  | -3.32817500 | -0.32869900 |
| C  | 6.49551500  | -2.46296400 | 0.14614100  |
| C  | 7.38318800  | -2.92797400 | 1.12374400  |
| C  | 7.27987000  | -4.22801000 | 1.61769500  |
| H  | 6.20695800  | -6.09775000 | 1.52032500  |
| H  | 4.61972500  | -5.28634100 | -0.21626600 |
| H  | 4.79668000  | -2.96922800 | -1.07097300 |
| H  | 8.16485100  | -2.26946200 | 1.49264700  |
| H  | 7.97840700  | -4.57422200 | 2.37469600  |
| O  | 0.11998300  | 1.15256500  | 1.69090400  |
| C  | 0.47701000  | 1.00654900  | 3.09096400  |
| C  | 1.92251400  | 1.38009400  | 3.37291900  |
| H  | 0.30755500  | -0.04978500 | 3.30352300  |
| H  | -0.22328500 | 1.60741800  | 3.67917800  |
| H  | 2.16139200  | 1.09730800  | 4.40507000  |
| H  | 2.59429300  | 0.83437300  | 2.70696100  |
| H  | 2.08589300  | 2.45280600  | 3.26049700  |
| C  | -4.65163500 | 3.13672100  | 0.94593400  |
| C  | -4.17255900 | 2.64709300  | -0.27096800 |
| C  | -3.14781800 | 1.69904900  | -0.28992600 |
| C  | -2.57854400 | 1.18641300  | 0.89130800  |
| C  | -3.07715900 | 1.70710800  | 2.09934300  |
| C  | -4.09717300 | 2.66638400  | 2.13611700  |
| H  | -5.45082000 | 3.87221200  | 0.96217100  |
| H  | -4.60894900 | 2.99835100  | -1.20260800 |
| H  | -2.78765000 | 1.34524200  | -1.25321900 |
| H  | -2.66814800 | 1.35440000  | 3.04767800  |
| H  | -4.45729100 | 3.04316400  | 3.09185000  |
| C  | 0.01542600  | 3.52578100  | -1.09017600 |
| C  | 0.79934300  | 4.67698900  | 0.95891200  |
| C  | -0.16358600 | 4.78970900  | -0.22923500 |

|   |             |            |             |
|---|-------------|------------|-------------|
| H | 0.94372100  | 3.59319400 | -1.67206500 |
| H | 0.66893800  | 5.52009000 | 1.64400600  |
| B | 0.24748400  | 2.35970300 | 1.01580100  |
| O | 0.07425300  | 2.31655000 | -0.32971800 |
| O | 0.56200400  | 3.48553600 | 1.71630500  |
| H | -0.82105000 | 3.42205800 | -1.78874400 |
| H | 1.84281800  | 4.67412000 | 0.61433400  |
| C | 0.20771000  | 6.01703400 | -1.07138100 |
| H | 1.24885000  | 5.97526200 | -1.41360000 |
| H | -0.43638400 | 6.08772900 | -1.95540200 |
| H | 0.07618500  | 6.93837000 | -0.49279400 |
| C | -1.60699600 | 4.91435600 | 0.28221100  |
| H | -1.71260400 | 5.81591900 | 0.89753600  |
| H | -2.30786100 | 4.98856100 | -0.55444400 |
| H | -1.91335800 | 4.05674100 | 0.88370300  |

**im9c**

SCF Energy (a.u.) = -2427.929536

Thermal correction to Gibbs free energy (a.u.) = 0.862353

Charge = 0, Multiplicity = 1

|   |              |             |             |
|---|--------------|-------------|-------------|
| C | -9.00524700  | -1.95980100 | -1.00778400 |
| C | -9.38506900  | -3.26703900 | -0.67014200 |
| C | -10.67376000 | -3.55575900 | -0.23794100 |
| C | -11.64033500 | -2.54073100 | -0.12458100 |
| C | -11.25570000 | -1.23356100 | -0.46332600 |
| C | -9.96383600  | -0.94731000 | -0.89583900 |
| H | -8.65427000  | -4.06900300 | -0.74984000 |
| H | -10.93327800 | -4.58013600 | 0.01174500  |
| H | -11.98387400 | -0.43012100 | -0.38151900 |
| H | -9.68871100  | 0.07619000  | -1.13388300 |
| C | -13.01698700 | -2.78632300 | 0.32674400  |
| C | -13.56174500 | -3.95707700 | 0.68106400  |
| H | -13.64330500 | -1.89515400 | 0.36842300  |
| H | -14.59719900 | -4.01697700 | 1.00125000  |

|    |              |             |             |
|----|--------------|-------------|-------------|
| H  | -13.00780800 | -4.89169000 | 0.66663900  |
| C  | -6.68208900  | -1.37065800 | -0.17081700 |
| C  | -7.58411800  | -1.65287800 | -1.40581400 |
| H  | -7.15412100  | -2.49443600 | -1.96150300 |
| H  | -7.56688200  | -0.78265200 | -2.07056400 |
| H  | -6.80548000  | -2.22512600 | 0.50622600  |
| C  | -5.20500300  | -1.27949500 | -0.51851700 |
| C  | -4.25457600  | -1.69354900 | 0.42379000  |
| C  | -4.73773500  | -0.76902100 | -1.73305600 |
| C  | -2.89153000  | -1.59657200 | 0.16318400  |
| H  | -4.59327400  | -2.09780300 | 1.37521100  |
| C  | -3.37092800  | -0.66410600 | -1.98942100 |
| H  | -5.43856700  | -0.43883600 | -2.49348900 |
| C  | -2.42378600  | -1.06690700 | -1.04697800 |
| H  | -2.18203500  | -1.94069700 | 0.91189100  |
| H  | -3.03640700  | -0.23639600 | -2.92905200 |
| C  | -8.20600600  | 2.13367800  | 1.87405200  |
| C  | -8.45330900  | 0.85880100  | 2.38326500  |
| C  | -7.94183200  | -0.26581700 | 1.73344400  |
| C  | -7.17602700  | -0.13624500 | 0.57091500  |
| C  | -6.93239100  | 1.14755600  | 0.06805900  |
| C  | -7.44298800  | 2.27387300  | 0.71203700  |
| H  | -8.60235800  | 3.01103800  | 2.37761300  |
| H  | -9.04783200  | 0.73675000  | 3.28459100  |
| H  | -8.15290200  | -1.25836700 | 2.12269000  |
| H  | -6.32107600  | 1.26587900  | -0.82022800 |
| H  | -7.23934900  | 3.26273500  | 0.30907800  |
| Ni | 0.39334000   | 1.58813700  | -0.32446000 |
| C  | -0.13059300  | -0.27255700 | -0.26235100 |
| C  | -0.94230300  | -0.97476400 | -1.34324300 |
| H  | -0.54927000  | -1.99865000 | -1.46615900 |
| H  | -0.80653000  | -0.47755900 | -2.30944400 |
| H  | -0.53297700  | -0.42983800 | 0.74121700  |
| C  | 1.32692400   | -0.32560900 | -0.31585300 |

|    |             |             |             |
|----|-------------|-------------|-------------|
| C  | 2.06452800  | -0.55613600 | -1.51268600 |
| C  | 2.06149600  | 0.10108600  | 0.81931700  |
| C  | 3.43408800  | -0.37412700 | -1.54899800 |
| H  | 1.53643800  | -0.87333300 | -2.40594600 |
| C  | 3.45290800  | 0.26104300  | 0.76979600  |
| H  | 1.53856600  | 0.22061800  | 1.76391100  |
| C  | 4.15691300  | 0.04390300  | -0.40917800 |
| H  | 3.97363300  | -0.55688000 | -2.47601900 |
| H  | 3.99075000  | 0.54281300  | 1.67045600  |
| C  | 6.34228900  | -1.22084800 | -0.19614100 |
| C  | 5.65964500  | 0.14971300  | -0.45565000 |
| H  | 5.98070700  | 0.52307400  | -1.43559000 |
| H  | 6.00280100  | 0.86852500  | 0.29693600  |
| H  | 5.93339400  | -1.91898800 | -0.93834400 |
| C  | 7.85277900  | -1.19985000 | -0.38186700 |
| C  | 8.53661800  | -2.42377700 | -0.42236300 |
| C  | 8.59892000  | -0.02326200 | -0.48996400 |
| C  | 9.91933400  | -2.48182700 | -0.57110900 |
| H  | 7.97419900  | -3.34870300 | -0.32463500 |
| C  | 9.98948200  | -0.05641900 | -0.63738100 |
| H  | 8.10751000  | 0.94317300  | -0.46316300 |
| C  | 10.62826300 | -1.28760100 | -0.67640100 |
| H  | 10.43414000 | -3.43526400 | -0.60297900 |
| H  | 10.55624400 | 0.86392400  | -0.72033500 |
| Br | 12.57361600 | -1.34970200 | -0.88421400 |
| C  | 5.11472800  | -2.59110500 | 3.72300500  |
| C  | 4.50096100  | -3.09860400 | 2.57755600  |
| C  | 4.91971100  | -2.67640400 | 1.31492800  |
| C  | 5.95456200  | -1.74593400 | 1.17872300  |
| C  | 6.56961900  | -1.24739400 | 2.33357600  |
| C  | 6.15222000  | -1.66406000 | 3.59698300  |
| H  | 4.79106200  | -2.91784600 | 4.70709400  |
| H  | 3.69393800  | -3.82066600 | 2.66442200  |
| H  | 4.42574400  | -3.05733900 | 0.42494600  |

|   |             |             |             |
|---|-------------|-------------|-------------|
| H | 7.38547200  | -0.53562600 | 2.23970100  |
| H | 6.64047700  | -1.26931000 | 4.48372200  |
| C | -4.01597300 | 2.83856700  | -1.45849400 |
| C | -3.03369500 | 2.76225800  | -2.44651800 |
| C | -1.73808700 | 2.34863300  | -2.11872800 |
| C | -1.38050100 | 2.02160400  | -0.79991100 |
| C | -2.39649700 | 2.07282200  | 0.16917800  |
| C | -3.69294700 | 2.48208600  | -0.14734600 |
| H | -5.02311800 | 3.16298700  | -1.70871600 |
| H | -3.27333200 | 3.02310000  | -3.47554300 |
| H | -0.99452600 | 2.29481800  | -2.91318000 |
| H | -2.17769800 | 1.78169300  | 1.19313500  |
| H | -4.45691200 | 2.50184500  | 0.62492000  |
| C | 2.07935100  | 3.10263900  | -0.34964600 |
| C | 1.03269800  | 3.66840800  | -1.02074800 |
| C | 0.17410700  | 4.84942100  | -0.64193700 |
| C | 0.12139600  | 5.25868600  | 0.84677700  |
| C | -0.29807100 | 4.13425500  | 1.75354200  |
| C | 0.51338500  | 3.25282800  | 2.34750800  |
| C | 2.02096100  | 3.19646000  | 2.28661700  |
| C | 2.70303100  | 3.58610100  | 0.95091600  |
| H | 2.68188600  | 2.38593100  | -0.90739800 |
| H | 0.88905100  | 3.34812700  | -2.05177700 |
| H | -0.84186100 | 4.64093500  | -0.99295100 |
| H | 0.52503100  | 5.71327100  | -1.22805800 |
| H | 1.08288100  | 5.67315000  | 1.16023100  |
| H | -0.60289900 | 6.07758200  | 0.93176700  |
| H | -1.36976300 | 4.00529000  | 1.87935500  |
| H | 0.05039500  | 2.48352400  | 2.96524500  |
| H | 2.32665000  | 2.17761200  | 2.54028600  |
| H | 2.44999200  | 3.83141800  | 3.07686000  |
| H | 2.80852100  | 4.67378000  | 0.90069100  |
| H | 3.72452800  | 3.19158000  | 0.98693300  |

**TS5c**

SCF Energy (a.u.) = -2427.918802

Thermal correction to Gibbs free energy (a.u.) = 0.864917

Charge = 0, Multiplicity = 1

|   |              |             |             |
|---|--------------|-------------|-------------|
| C | -8.97992200  | -2.08092300 | -0.88665700 |
| C | -9.39292700  | -3.30759300 | -0.34653100 |
| C | -10.69048600 | -3.49262600 | 0.11490700  |
| C | -11.63261300 | -2.45034000 | 0.05453300  |
| C | -11.21470200 | -1.22435000 | -0.48724600 |
| C | -9.91387400  | -1.04175400 | -0.94829100 |
| H | -8.68172800  | -4.12889000 | -0.28947500 |
| H | -10.97625100 | -4.45700800 | 0.52386500  |
| H | -11.92353900 | -0.40167700 | -0.54290600 |
| H | -9.61260100  | -0.07678700 | -1.34591200 |
| C | -13.01707300 | -2.58779400 | 0.52756600  |
| C | -13.59090500 | -3.67274500 | 1.06273100  |
| H | -13.62224300 | -1.68784000 | 0.41828200  |
| H | -14.62906600 | -3.65648100 | 1.37923400  |
| H | -13.05920800 | -4.60948200 | 1.20538900  |
| C | -6.64667300  | -1.43787300 | -0.12630200 |
| C | -7.54925800  | -1.87407300 | -1.31437300 |
| H | -7.14049800  | -2.79934600 | -1.73744300 |
| H | -7.50607100  | -1.11107700 | -2.09896200 |
| H | -6.79529600  | -2.18011900 | 0.66782500  |
| C | -5.16552300  | -1.42449900 | -0.46555900 |
| C | -4.23110300  | -1.66263700 | 0.55157000  |
| C | -4.68014800  | -1.13239200 | -1.74295900 |
| C | -2.86505900  | -1.58464400 | 0.30504300  |
| H | -4.58580000  | -1.90179400 | 1.55148900  |
| C | -3.30932400  | -1.04470300 | -1.98662500 |
| H | -5.36971600  | -0.95541100 | -2.56232100 |
| C | -2.38031200  | -1.24850300 | -0.96639700 |
| H | -2.16561100  | -1.77585100 | 1.11583700  |
| H | -2.95953000  | -0.78343800 | -2.98035400 |

|    |             |             |             |
|----|-------------|-------------|-------------|
| C  | -8.07035300 | 2.37205000  | 1.37373000  |
| C  | -8.37952200 | 1.19028800  | 2.04726900  |
| C  | -7.90140600 | -0.03198900 | 1.57195800  |
| C  | -7.10779800 | -0.09364900 | 0.42249300  |
| C  | -6.80187800 | 1.09805100  | -0.24638600 |
| C  | -7.27951000 | 2.32110500  | 0.22309100  |
| H  | -8.44052900 | 3.32497800  | 1.74138700  |
| H  | -8.99614900 | 1.21681600  | 2.94148900  |
| H  | -8.16027100 | -0.95220800 | 2.08891500  |
| H  | -6.16811800 | 1.06962100  | -1.12688100 |
| H  | -7.02933800 | 3.23637400  | -0.30737800 |
| Ni | 0.68029500  | 1.82085200  | -0.30331800 |
| C  | -0.19238400 | -0.08401600 | -0.31475600 |
| C  | -0.89703500 | -1.10733400 | -1.21824800 |
| H  | -0.40167100 | -2.07366800 | -1.03676600 |
| H  | -0.72884100 | -0.86595000 | -2.27124800 |
| H  | -0.56059000 | -0.16130700 | 0.70910300  |
| C  | 1.28374900  | -0.10725500 | -0.35989300 |
| C  | 2.02566100  | -0.39628200 | -1.54225600 |
| C  | 2.01422600  | 0.33742500  | 0.77629700  |
| C  | 3.39898000  | -0.25601400 | -1.56807800 |
| H  | 1.50116600  | -0.72621200 | -2.43308900 |
| C  | 3.41597300  | 0.45674800  | 0.72661500  |
| H  | 1.50546500  | 0.44028300  | 1.73045700  |
| C  | 4.12214000  | 0.18292200  | -0.43467700 |
| H  | 3.94210400  | -0.48613500 | -2.48244100 |
| H  | 3.95444900  | 0.74822400  | 1.62387400  |
| C  | 6.26591500  | -1.14749400 | -0.18795600 |
| C  | 5.62812800  | 0.24034900  | -0.46820000 |
| H  | 5.97072400  | 0.59262300  | -1.44891700 |
| H  | 5.98655600  | 0.95678500  | 0.27953600  |
| H  | 5.84119600  | -1.84094500 | -0.92574600 |
| C  | 7.77769600  | -1.17795400 | -0.36082500 |
| C  | 8.42248100  | -2.42340100 | -0.38302300 |

|    |             |             |             |
|----|-------------|-------------|-------------|
| C  | 8.56227100  | -0.02712300 | -0.47478100 |
| C  | 9.80382000  | -2.52747600 | -0.51948600 |
| H  | 7.82977400  | -3.32871000 | -0.28041300 |
| C  | 9.95224300  | -0.10628800 | -0.61015500 |
| H  | 8.10136100  | 0.95445200  | -0.46195100 |
| C  | 10.55127800 | -1.35766400 | -0.63109300 |
| H  | 10.28810300 | -3.49715700 | -0.53710900 |
| H  | 10.54894100 | 0.79450800  | -0.69775000 |
| Br | 12.49595300 | -1.48440600 | -0.82201400 |
| C  | 4.96544400  | -2.43821500 | 3.73534800  |
| C  | 4.33615400  | -2.92734000 | 2.59021300  |
| C  | 4.77724000  | -2.53108600 | 1.32685100  |
| C  | 5.85057700  | -1.64528000 | 1.18898100  |
| C  | 6.47996600  | -1.16461300 | 2.34357900  |
| C  | 6.04038600  | -1.55526900 | 3.60785800  |
| H  | 4.62459800  | -2.74503400 | 4.72012000  |
| H  | 3.49980100  | -3.61525700 | 2.67807900  |
| H  | 4.27154000  | -2.89641000 | 0.43696700  |
| H  | 7.32409700  | -0.48680000 | 2.24901200  |
| H  | 6.54038200  | -1.17438100 | 4.49415900  |
| C  | -3.65883000 | 2.50991300  | -1.81822000 |
| C  | -2.62084600 | 2.23939800  | -2.71648300 |
| C  | -1.40588900 | 1.73452900  | -2.25734300 |
| C  | -1.17346900 | 1.53695700  | -0.88151900 |
| C  | -2.24473800 | 1.76818800  | -0.00148500 |
| C  | -3.46776500 | 2.25851200  | -0.45872600 |
| H  | -4.60932800 | 2.89466200  | -2.17799900 |
| H  | -2.76114300 | 2.41859300  | -3.78008000 |
| H  | -0.61206700 | 1.52408200  | -2.97105600 |
| H  | -2.12001800 | 1.56129600  | 1.05657200  |
| H  | -4.27779400 | 2.42457800  | 0.24529800  |
| C  | 1.95199600  | 3.38421300  | -0.34947600 |
| C  | 0.75113900  | 3.75293100  | -0.95876300 |
| C  | -0.30501200 | 4.73080900  | -0.49342000 |

|   |             |            |             |
|---|-------------|------------|-------------|
| C | -0.34507300 | 5.08093100 | 1.01059100  |
| C | -0.48749700 | 3.88266700 | 1.90737600  |
| C | 0.50908700  | 3.15862500 | 2.43048300  |
| C | 1.99576700  | 3.38384600 | 2.29308900  |
| C | 2.52968600  | 3.93903000 | 0.95039600  |
| H | 2.70672700  | 2.95527800 | -1.01238400 |
| H | 0.68649500  | 3.56517600 | -2.03096800 |
| H | -1.28358900 | 4.33848700 | -0.79411900 |
| H | -0.17329900 | 5.67103200 | -1.05192000 |
| H | 0.54249900  | 5.65823800 | 1.28156600  |
| H | -1.20106700 | 5.74822500 | 1.16978800  |
| H | -1.50736700 | 3.56463700 | 2.11106500  |
| H | 0.23265800  | 2.31593000 | 3.06532400  |
| H | 2.49236200  | 2.42811100 | 2.48550800  |
| H | 2.33880800  | 4.05345700 | 3.09744400  |
| H | 2.43527500  | 5.03028600 | 0.94377600  |
| H | 3.60805100  | 3.74121500 | 0.93933100  |

**im10c**

SCF Energy (a.u.) = -2427.968971

Thermal correction to Gibbs free energy (a.u.) = 0.866031

Charge = 0, Multiplicity = 1

|   |              |             |             |
|---|--------------|-------------|-------------|
| C | -9.07434600  | -1.59889600 | -1.17479600 |
| C | -9.64182800  | -2.87825700 | -1.08314900 |
| C | -10.96524400 | -3.05462000 | -0.69825500 |
| C | -11.77898800 | -1.95045800 | -0.38756000 |
| C | -11.20692900 | -0.67184000 | -0.48214900 |
| C | -9.88027700  | -0.49838800 | -0.86702600 |
| H | -9.03197900  | -3.74784800 | -1.31876900 |
| H | -11.37231600 | -4.05958700 | -0.64121400 |
| H | -11.81436700 | 0.19823000  | -0.24486000 |
| H | -9.45775000  | 0.50132800  | -0.91310600 |
| C | -13.18342700 | -2.07629600 | 0.02608000  |
| C | -13.89234700 | -3.20313800 | 0.16907800  |

|    |              |             |             |
|----|--------------|-------------|-------------|
| H  | -13.67871800 | -1.12796200 | 0.23444100  |
| H  | -14.93077600 | -3.17323700 | 0.48368700  |
| H  | -13.47494700 | -4.18850400 | -0.01896400 |
| C  | -6.70368800  | -1.56394500 | -0.27030900 |
| C  | -7.61703500  | -1.42923300 | -1.52057900 |
| H  | -7.31072800  | -2.18294600 | -2.25590500 |
| H  | -7.45922300  | -0.44593900 | -1.97644400 |
| H  | -6.96232400  | -2.51827500 | 0.20554800  |
| C  | -5.22153200  | -1.60274800 | -0.60172200 |
| C  | -4.34115100  | -2.21251700 | 0.30282000  |
| C  | -4.67850000  | -0.99161900 | -1.73555000 |
| C  | -2.96612100  | -2.18592400 | 0.09531800  |
| H  | -4.74460200  | -2.69671100 | 1.18911200  |
| C  | -3.29880700  | -0.95775800 | -1.93841500 |
| H  | -5.32754500  | -0.51632800 | -2.46379400 |
| C  | -2.42084200  | -1.53937500 | -1.02180300 |
| H  | -2.30294600  | -2.65628700 | 0.81840400  |
| H  | -2.89749600  | -0.43997200 | -2.80531300 |
| C  | -7.70185000  | 1.60359600  | 2.51546300  |
| C  | -8.22738900  | 0.32290800  | 2.68759900  |
| C  | -7.88530200  | -0.69890700 | 1.80056400  |
| C  | -7.01389900  | -0.45966100 | 0.73324400  |
| C  | -6.48723900  | 0.82801400  | 0.57073200  |
| C  | -6.83047200  | 1.85226600  | 1.45230000  |
| H  | -7.96631000  | 2.40112400  | 3.20418400  |
| H  | -8.90724600  | 0.11749700  | 3.50991000  |
| H  | -8.31257200  | -1.69018500 | 1.92602700  |
| H  | -5.78937600  | 1.02421200  | -0.23753800 |
| H  | -6.41432300  | 2.84663400  | 1.31122900  |
| Ni | 0.43598300   | 2.43184400  | -0.15566000 |
| C  | -0.39767200  | -0.25171000 | -0.22544500 |
| C  | -0.93076100  | -1.37132700 | -1.16405300 |
| H  | -0.40271600  | -2.30293900 | -0.92381500 |
| H  | -0.69017900  | -1.12213400 | -2.20244800 |

|    |             |             |             |
|----|-------------|-------------|-------------|
| H  | -0.64243000 | -0.55494000 | 0.79966500  |
| C  | 1.11757000  | -0.10214800 | -0.29113600 |
| C  | 1.84721300  | -0.19283200 | -1.48891300 |
| C  | 1.83959900  | 0.10139400  | 0.89557400  |
| C  | 3.23417000  | -0.06869700 | -1.49601500 |
| H  | 1.33062100  | -0.36672000 | -2.42714500 |
| C  | 3.22930700  | 0.21873000  | 0.88702900  |
| H  | 1.30298800  | 0.14313300  | 1.83806800  |
| C  | 3.94789200  | 0.14293500  | -0.30852600 |
| H  | 3.77353900  | -0.13961300 | -2.43800800 |
| H  | 3.76373200  | 0.34597300  | 1.82374700  |
| C  | 6.08956900  | -1.21172800 | -0.23060900 |
| C  | 5.45474500  | 0.20201900  | -0.31676000 |
| H  | 5.80581000  | 0.69027200  | -1.23367000 |
| H  | 5.80439600  | 0.80490700  | 0.52897300  |
| H  | 5.67713000  | -1.78975600 | -1.06802600 |
| C  | 7.60409900  | -1.21608800 | -0.38298000 |
| C  | 8.25271500  | -2.44637200 | -0.56490200 |
| C  | 8.38658900  | -0.05959600 | -0.32819400 |
| C  | 9.63607300  | -2.52934800 | -0.69457900 |
| H  | 7.66137900  | -3.35786400 | -0.59450900 |
| C  | 9.77856200  | -0.11818200 | -0.45316600 |
| H  | 7.92295000  | 0.91082000  | -0.18878500 |
| C  | 10.38160000 | -1.35442100 | -0.63552800 |
| H  | 10.12345600 | -3.48712600 | -0.83680700 |
| H  | 10.37366300 | 0.78682600  | -0.40891600 |
| Br | 12.32891200 | -1.45205700 | -0.81410500 |
| C  | 4.73882800  | -3.06469800 | 3.44186000  |
| C  | 4.13837900  | -3.39455800 | 2.22663700  |
| C  | 4.59548500  | -2.81672000 | 1.04143500  |
| C  | 5.65604000  | -1.90567800 | 1.05262800  |
| C  | 6.25739500  | -1.58592700 | 2.27601400  |
| C  | 5.80157700  | -2.15818100 | 3.46282500  |
| H  | 4.38504900  | -3.51263900 | 4.36609700  |

|   |             |             |             |
|---|-------------|-------------|-------------|
| H | 3.31165000  | -4.09895100 | 2.19944900  |
| H | 4.11168300  | -3.05804300 | 0.09865300  |
| H | 7.09219000  | -0.89040900 | 2.29532400  |
| H | 6.27908200  | -1.90046900 | 4.40415700  |
| C | -2.83894100 | 3.16572800  | -1.28197200 |
| C | -1.73137800 | 2.86267700  | -2.04510500 |
| C | -0.83848200 | 1.81367200  | -1.67444600 |
| C | -1.10951500 | 1.07738300  | -0.47209200 |
| C | -2.31260400 | 1.36113200  | 0.24313200  |
| C | -3.14420500 | 2.39098700  | -0.13306800 |
| H | -3.50111400 | 3.97392200  | -1.58058300 |
| H | -1.53539300 | 3.41528600  | -2.96093500 |
| H | -0.17057900 | 1.41505600  | -2.43290500 |
| H | -2.57055700 | 0.73694000  | 1.09444800  |
| H | -4.04091800 | 2.59920200  | 0.44260900  |
| C | 2.29431000  | 3.34224900  | -0.43421000 |
| C | 1.36785300  | 3.98904600  | -1.22997900 |
| C | 0.56932800  | 5.21300300  | -0.83853300 |
| C | 0.12541800  | 5.22349400  | 0.64965400  |
| C | -0.24718600 | 3.84805000  | 1.18148100  |
| C | 0.61384500  | 3.01749600  | 1.87999800  |
| C | 2.07533400  | 3.31305400  | 2.14087600  |
| C | 2.83425700  | 3.85074100  | 0.89472500  |
| H | 2.87084300  | 2.54599400  | -0.90134400 |
| H | 1.30805400  | 3.70467300  | -2.27857900 |
| H | -0.32763600 | 5.23349400  | -1.46750000 |
| H | 1.12455200  | 6.13831300  | -1.05879100 |
| H | 0.91228100  | 5.66128300  | 1.27119600  |
| H | -0.74144000 | 5.88747800  | 0.74540400  |
| H | -1.31135700 | 3.63123400  | 1.22413200  |
| H | 0.17348300  | 2.21385400  | 2.46862900  |
| H | 2.55267100  | 2.38510200  | 2.46994800  |
| H | 2.19588600  | 4.02692600  | 2.97105500  |
| H | 2.82666300  | 4.94504100  | 0.89755100  |

|   |            |            |            |
|---|------------|------------|------------|
| H | 3.88788500 | 3.55827800 | 0.97591100 |
|---|------------|------------|------------|

**P2a**

SCF Energy (a.u.) = -1944.863370

Thermal correction to Gibbs free energy (a.u.) = 0.692866

Charge = 0, Multiplicity = 1

|   |              |             |             |
|---|--------------|-------------|-------------|
| C | -8.95187100  | 0.96972300  | -0.86295500 |
| C | -9.58423800  | 0.78224000  | -2.10078400 |
| C | -10.89047600 | 0.31523400  | -2.18010200 |
| C | -11.62092600 | 0.01533400  | -1.01628100 |
| C | -10.98426000 | 0.20609200  | 0.22034200  |
| C | -9.67491800  | 0.67306700  | 0.29654800  |
| H | -9.03945200  | 1.00767200  | -3.01511300 |
| H | -11.34951300 | 0.18479600  | -3.15538100 |
| H | -11.52662800 | -0.02073800 | 1.13504300  |
| H | -9.20007400  | 0.79313100  | 1.26621300  |
| C | -13.00349200 | -0.48207000 | -1.03914900 |
| C | -13.76594700 | -0.71876100 | -2.11404100 |
| H | -13.43074700 | -0.67170800 | -0.05449400 |
| H | -14.78067400 | -1.08928000 | -2.00802200 |
| H | -13.41736200 | -0.55520300 | -3.13004200 |
| C | -6.53298100  | 0.20376200  | -0.93458700 |
| C | -7.51020800  | 1.40465100  | -0.79627300 |
| H | -7.29214800  | 2.12170900  | -1.59683800 |
| H | -7.32321200  | 1.91226300  | 0.15605000  |
| H | -6.81806000  | -0.32834400 | -1.85088900 |
| C | -5.07845200  | 0.61752600  | -1.07651000 |
| C | -4.18282900  | -0.25703400 | -1.70696000 |
| C | -4.56816500  | 1.80042000  | -0.53379000 |
| C | -2.82119100  | 0.02350900  | -1.75879200 |
| H | -4.56108700  | -1.17949400 | -2.14136200 |
| C | -3.20156300  | 2.07621200  | -0.57775100 |
| H | -5.23119100  | 2.50917800  | -0.04836000 |
| C | -2.30509500  | 1.18629800  | -1.17227200 |

|   |             |             |             |
|---|-------------|-------------|-------------|
| H | -2.14447800 | -0.67996500 | -2.23937800 |
| H | -2.82186000 | 2.97874600  | -0.10670700 |
| C | -7.18633200 | -2.49156600 | 2.39818300  |
| C | -7.78367200 | -2.74020500 | 1.16233300  |
| C | -7.55081300 | -1.88123000 | 0.08737900  |
| C | -6.71815900 | -0.76604300 | 0.22708900  |
| C | -6.11706100 | -0.52778100 | 1.46990500  |
| C | -6.35254300 | -1.38089800 | 2.54755800  |
| H | -7.36648600 | -3.15751900 | 3.23745400  |
| H | -8.43507300 | -3.60023200 | 1.03357600  |
| H | -8.03482300 | -2.06641300 | -0.86775200 |
| H | -5.44776800 | 0.31875800  | 1.59039400  |
| H | -5.88298700 | -1.17854400 | 3.50690300  |
| C | -0.21274200 | 0.50541400  | 0.05667000  |
| C | -0.81685100 | 1.39925800  | -1.06138800 |
| H | -0.31495700 | 1.16534400  | -2.00850400 |
| H | -0.61241900 | 2.45117000  | -0.83357600 |
| H | -0.41915200 | -0.53323700 | -0.23374800 |
| C | 1.29605800  | 0.63712100  | 0.20869100  |
| C | 2.05427600  | 1.62555400  | -0.42489200 |
| C | 1.96598500  | -0.27195200 | 1.04107200  |
| C | 3.43660500  | 1.69900900  | -0.23426400 |
| H | 1.57609000  | 2.35031400  | -1.07510700 |
| C | 3.34120500  | -0.20089800 | 1.22727800  |
| H | 1.39243000  | -1.04099400 | 1.55239200  |
| C | 4.10158800  | 0.78974300  | 0.59087400  |
| H | 4.00461400  | 2.47829900  | -0.73819800 |
| H | 3.83878700  | -0.93045900 | 1.86015200  |
| C | 6.31272000  | 0.05269200  | -0.40931300 |
| C | 5.60309200  | 0.83116200  | 0.73052900  |
| H | 5.95265500  | 1.87054400  | 0.71455900  |
| H | 5.89713100  | 0.40232500  | 1.69534600  |
| H | 5.94510500  | 0.47878600  | -1.35189500 |
| C | 7.82723300  | 0.20471400  | -0.40837300 |

|    |             |             |             |
|----|-------------|-------------|-------------|
| C  | 8.54245300  | -0.22810100 | -1.53463200 |
| C  | 8.54712400  | 0.73164600  | 0.66730100  |
| C  | 9.93003400  | -0.13696700 | -1.59722700 |
| H  | 8.00032400  | -0.65483800 | -2.37452000 |
| C  | 9.94187700  | 0.83079700  | 0.62893100  |
| H  | 8.03058600  | 1.07697100  | 1.55614100  |
| C  | 10.61157900 | 0.39478800  | -0.50533100 |
| H  | 10.46915600 | -0.47352600 | -2.47541000 |
| H  | 10.48791700 | 1.24169500  | 1.47045900  |
| Br | 12.56415600 | 0.52941800  | -0.57467000 |
| C  | 5.03038800  | -4.08055300 | -0.25016300 |
| C  | 4.45224900  | -3.20000100 | -1.16469000 |
| C  | 4.88587400  | -1.87531200 | -1.23008100 |
| C  | 5.90098100  | -1.41262200 | -0.38714400 |
| C  | 6.47884000  | -2.30469900 | 0.52437400  |
| C  | 6.04630800  | -3.62821800 | 0.59516100  |
| H  | 4.69488700  | -5.11242100 | -0.19717400 |
| H  | 3.66054000  | -3.54145700 | -1.82578600 |
| H  | 4.41869700  | -1.18548600 | -1.92776000 |
| H  | 7.27848400  | -1.96074000 | 1.17490000  |
| H  | 6.50592400  | -4.30847100 | 1.30693400  |
| C  | -2.40163200 | 1.28001700  | 3.71372500  |
| C  | -1.36678300 | 2.13237900  | 3.32138600  |
| C  | -0.63998800 | 1.86535700  | 2.16143700  |
| C  | -0.93945000 | 0.74844000  | 1.37266700  |
| C  | -1.97547100 | -0.10056100 | 1.77569400  |
| C  | -2.70176500 | 0.15957900  | 2.93811700  |
| H  | -2.96558100 | 1.48625900  | 4.61922100  |
| H  | -1.12199800 | 3.00392300  | 3.92259700  |
| H  | 0.17347200  | 2.52284100  | 1.86636600  |
| H  | -2.23276400 | -0.95826000 | 1.16067000  |
| H  | -3.50136900 | -0.51461100 | 3.23112500  |

im3d

SCF Energy (a.u.) = -2438.376267

Thermal correction to Gibbs free energy (a.u.) = 0.810526

Charge = 0, Multiplicity = 1

|   |             |             |             |
|---|-------------|-------------|-------------|
| C | -3.05045200 | -2.80847900 | -2.91531300 |
| C | -1.68293700 | -2.91991200 | -3.19689400 |
| C | -0.88010100 | -3.83220200 | -2.52022900 |
| C | -1.42609400 | -4.64726900 | -1.51495300 |
| C | -2.81148800 | -4.57942000 | -1.27686700 |
| C | -3.60856200 | -3.68186800 | -1.97140700 |
| H | -1.23759000 | -2.25725400 | -3.93332000 |
| H | 0.17998300  | -3.88569300 | -2.74432300 |
| H | -3.25113700 | -5.21790400 | -0.51487900 |
| H | -4.67196500 | -3.62829900 | -1.75385200 |
| C | -0.62496200 | -5.51669000 | -0.65306000 |
| C | 0.74940200  | -5.63541300 | -0.55320800 |
| H | -1.22043100 | -6.22616000 | -0.06852700 |
| H | 1.18490100  | -6.47913000 | -0.02423300 |
| H | 1.42168100  | -5.07283400 | -1.19012600 |
| C | -4.24119000 | -0.65124500 | -2.43317300 |
| C | -3.88883400 | -1.70855600 | -3.51347000 |
| H | -3.34561100 | -1.22862800 | -4.33459800 |
| H | -4.81829500 | -2.11783500 | -3.92834500 |
| H | -4.80110200 | -1.18222700 | -1.65200900 |
| C | -2.98384100 | -0.10361600 | -1.77462100 |
| C | -2.58164600 | -0.54857100 | -0.51113700 |
| C | -2.20725200 | 0.86800700  | -2.41194700 |
| C | -1.46334600 | -0.00856000 | 0.11983200  |
| H | -3.15857900 | -1.31600000 | -0.00222400 |
| C | -1.09214000 | 1.41038700  | -1.77690800 |
| H | -2.50777200 | 1.23949500  | -3.38816200 |
| C | -0.71063700 | 1.00253300  | -0.49278700 |
| H | -1.20125100 | -0.36410900 | 1.10940300  |
| H | -0.52697800 | 2.19729500  | -2.27136500 |
| C | -6.77877500 | 2.62366700  | -3.72327900 |

|    |             |             |             |
|----|-------------|-------------|-------------|
| C  | -6.36951000 | 1.67049500  | -4.65239100 |
| C  | -5.55284700 | 0.60536000  | -4.25751400 |
| C  | -5.13484200 | 0.47966800  | -2.93009600 |
| C  | -5.55017600 | 1.45059600  | -2.00384800 |
| C  | -6.36472300 | 2.50937500  | -2.39228700 |
| H  | -7.41279400 | 3.45085000  | -4.03007500 |
| H  | -6.68201600 | 1.74983800  | -5.69020300 |
| H  | -5.24723400 | -0.12448100 | -5.00008700 |
| H  | -5.21525100 | 1.38195200  | -0.97227800 |
| H  | -6.67013100 | 3.24502900  | -1.65416100 |
| C  | 0.10642300  | 2.31023600  | 1.61186600  |
| C  | 0.42956600  | 1.70890600  | 0.20327700  |
| H  | 1.29908800  | 1.05598600  | 0.30151100  |
| H  | 0.75961400  | 2.52980800  | -0.44010100 |
| C  | -1.36217100 | 2.71339900  | 1.69145200  |
| C  | -1.82937100 | 3.73781800  | 0.85822200  |
| C  | -2.28984500 | 2.02384300  | 2.47674000  |
| C  | -3.18515300 | 4.04756800  | 0.77282800  |
| H  | -1.12463900 | 4.28626700  | 0.23823400  |
| C  | -3.65387100 | 2.31757000  | 2.41270900  |
| H  | -1.95089700 | 1.23130900  | 3.13525200  |
| C  | -4.07955700 | 3.31810300  | 1.54926400  |
| H  | -3.53594700 | 4.83063100  | 0.11045700  |
| H  | -4.36550300 | 1.76435400  | 3.01498800  |
| Br | -5.99798100 | 3.70927600  | 1.41094700  |
| C  | 1.52095400  | 0.05259100  | 5.03694400  |
| C  | 1.39728000  | -0.58472000 | 3.80407900  |
| C  | 0.92539600  | 0.11579400  | 2.69056500  |
| C  | 0.57049600  | 1.46418600  | 2.78922500  |
| C  | 0.68751100  | 2.08997200  | 4.04000500  |
| C  | 1.15803600  | 1.39791100  | 5.15316900  |
| H  | 1.89105600  | -0.49188700 | 5.90114700  |
| H  | 1.65890300  | -1.63160300 | 3.69404700  |
| H  | 0.86054000  | -0.40895300 | 1.74566600  |

|    |             |             |             |
|----|-------------|-------------|-------------|
| H  | 0.41103100  | 3.13781000  | 4.13292400  |
| H  | 1.24541500  | 1.90717500  | 6.10927300  |
| H  | 0.69672400  | 3.23348000  | 1.66844900  |
| C  | 6.69048400  | 0.30728900  | -1.07405300 |
| C  | 7.02734100  | 0.21979900  | -2.43255800 |
| C  | 7.86662300  | 1.15263400  | -3.02945400 |
| C  | 8.40474400  | 2.21788400  | -2.28577800 |
| C  | 8.06460200  | 2.30122000  | -0.92609200 |
| C  | 7.22341300  | 1.36533800  | -0.33060900 |
| H  | 6.62339700  | -0.59600000 | -3.02838200 |
| H  | 8.10902500  | 1.05154800  | -4.08298400 |
| H  | 8.46610800  | 3.11679600  | -0.32954500 |
| H  | 6.96343000  | 1.46431100  | 0.71937200  |
| C  | 9.29626600  | 3.23357800  | -2.86292900 |
| C  | 9.73120900  | 3.31141800  | -4.12683400 |
| H  | 9.62439200  | 3.99807300  | -2.15875300 |
| H  | 10.39151500 | 4.11337000  | -4.44153900 |
| H  | 9.45309400  | 2.58996300  | -4.89017500 |
| C  | 4.24893200  | -0.20703400 | -0.64020700 |
| C  | 5.72031500  | -0.67027400 | -0.46043100 |
| H  | 5.83337900  | -1.65868600 | -0.92165000 |
| H  | 5.93610900  | -0.78329200 | 0.60752700  |
| H  | 4.11055600  | -0.01409200 | -1.71122500 |
| C  | 3.22554400  | -1.25847700 | -0.23716900 |
| C  | 1.96092700  | -1.24074500 | -0.83846300 |
| C  | 3.46775700  | -2.21469800 | 0.75629200  |
| C  | 0.96258200  | -2.14652700 | -0.46938500 |
| H  | 1.73457900  | -0.49099000 | -1.59271000 |
| C  | 2.48165100  | -3.13285600 | 1.13312400  |
| H  | 4.43198800  | -2.25528900 | 1.25359500  |
| C  | 1.23690300  | -3.10533100 | 0.50195200  |
| H  | -0.01547900 | -2.07725900 | -0.92760800 |
| H  | 2.69489400  | -3.85806800 | 1.91302600  |
| Br | -0.80262000 | -3.46453100 | 2.87136700  |

|    |            |             |             |
|----|------------|-------------|-------------|
| C  | 3.62385600 | 3.55043600  | 1.42487000  |
| C  | 3.73852400 | 3.52311600  | 0.03358800  |
| C  | 3.93372700 | 2.31000000  | -0.62798900 |
| C  | 4.01154100 | 1.11016400  | 0.08646700  |
| C  | 3.90027200 | 1.14955000  | 1.48122300  |
| C  | 3.70896400 | 2.35857100  | 2.14797200  |
| H  | 3.46902800 | 4.49308300  | 1.94254200  |
| H  | 3.67985500 | 4.44568000  | -0.53756000 |
| H  | 4.03549200 | 2.29229400  | -1.70984800 |
| H  | 3.92633500 | 0.22649800  | 2.05118800  |
| H  | 3.59660900 | 2.36223600  | 3.22737300  |
| Ni | 0.01040900 | -4.41263100 | 0.97921200  |

### TS2d

SCF Energy (a.u.) = -2438.367385

Thermal correction to Gibbs free energy (a.u.) = 0.814150

Charge = 0, Multiplicity = 1

|   |             |             |             |
|---|-------------|-------------|-------------|
| C | -4.00059600 | -3.12216800 | -2.15951700 |
| C | -2.72392100 | -3.16172100 | -2.73007000 |
| C | -1.70270800 | -3.89941000 | -2.14430600 |
| C | -1.92422700 | -4.61105300 | -0.95304900 |
| C | -3.23561800 | -4.66308000 | -0.44773900 |
| C | -4.25536600 | -3.93722800 | -1.04752900 |
| H | -2.51282400 | -2.55318300 | -3.60470300 |
| H | -0.71655900 | -3.88196500 | -2.59624200 |
| H | -3.42726600 | -5.21323100 | 0.46847200  |
| H | -5.24796000 | -3.94251900 | -0.60405000 |
| C | -0.83153100 | -5.18300300 | -0.15187900 |
| C | 0.54618900  | -5.14365900 | -0.53461400 |
| H | -1.12544200 | -5.89880600 | 0.61356700  |
| H | 1.22290400  | -5.83836700 | -0.04549900 |
| H | 0.79953500  | -4.95149900 | -1.57083600 |
| C | -5.00049100 | -0.90829000 | -1.55997200 |
| C | -4.99982400 | -2.08118500 | -2.58721200 |

|   |             |             |             |
|---|-------------|-------------|-------------|
| H | -4.74339800 | -1.69519800 | -3.58002900 |
| H | -6.00982300 | -2.50402600 | -2.64461500 |
| H | -5.35025200 | -1.34006500 | -0.61225500 |
| C | -3.58559200 | -0.40222200 | -1.30799800 |
| C | -2.83072500 | -0.89810300 | -0.23905700 |
| C | -2.99376900 | 0.54625800  | -2.14754000 |
| C | -1.53793200 | -0.44102700 | 0.00368900  |
| H | -3.24903800 | -1.65055900 | 0.42239600  |
| C | -1.70608000 | 1.01580300  | -1.89312300 |
| H | -3.56156700 | 0.95495000  | -2.97883500 |
| C | -0.95956700 | 0.54858600  | -0.80440000 |
| H | -1.01148200 | -0.82605400 | 0.86836100  |
| H | -1.28673900 | 1.79172200  | -2.52928500 |
| C | -7.69273000 | 2.37652200  | -2.46370400 |
| C | -7.66821100 | 1.26131100  | -3.29742000 |
| C | -6.80447900 | 0.19540900  | -3.02517000 |
| C | -5.95429700 | 0.22707800  | -1.91586700 |
| C | -5.98789400 | 1.35963500  | -1.08544000 |
| C | -6.84555700 | 2.42245700  | -1.35238400 |
| H | -8.36074900 | 3.20630800  | -2.67710900 |
| H | -8.31856300 | 1.21477800  | -4.16687100 |
| H | -6.80338700 | -0.66041200 | -3.69180100 |
| H | -5.31436200 | 1.41322500  | -0.23460600 |
| H | -6.84181000 | 3.28993900  | -0.69950500 |
| C | 0.37135100  | 1.97602600  | 0.89000200  |
| C | 0.35946200  | 1.20570400  | -0.46625600 |
| H | 1.18756600  | 0.49452800  | -0.47060400 |
| H | 0.58856500  | 1.93749400  | -1.24841600 |
| C | -0.89706500 | 2.80860600  | 0.99398200  |
| C | -0.95643100 | 4.05496900  | 0.36301400  |
| C | -2.05929000 | 2.31410000  | 1.59920600  |
| C | -2.14204800 | 4.79090500  | 0.30990200  |
| H | -0.06314100 | 4.45674000  | -0.10982500 |
| C | -3.25534700 | 3.02945700  | 1.55969000  |

|    |             |             |             |
|----|-------------|-------------|-------------|
| H  | -2.03543700 | 1.35378000  | 2.10088200  |
| C  | -3.27738300 | 4.25695800  | 0.90681000  |
| H  | -2.17697100 | 5.75405200  | -0.18635900 |
| H  | -4.14995900 | 2.63333400  | 2.02680500  |
| Br | -4.95812500 | 5.26544000  | 0.83245000  |
| C  | 1.36561400  | -0.26823400 | 4.47763400  |
| C  | 1.46554000  | -0.88364300 | 3.23156700  |
| C  | 1.12249000  | -0.18793300 | 2.07097600  |
| C  | 0.65997100  | 1.13106300  | 2.12725600  |
| C  | 0.56459000  | 1.73777200  | 3.38890500  |
| C  | 0.91355900  | 1.05164900  | 4.55068500  |
| H  | 1.62779200  | -0.81077200 | 5.38126200  |
| H  | 1.80492800  | -1.91197400 | 3.15281100  |
| H  | 1.23463600  | -0.69171400 | 1.12011800  |
| H  | 0.21203200  | 2.76310200  | 3.45726400  |
| H  | 0.82793000  | 1.54675500  | 5.51422500  |
| H  | 1.21510000  | 2.67388800  | 0.81316900  |
| C  | 7.17205900  | -0.00722500 | -0.83822300 |
| C  | 7.72032600  | -0.09137600 | -2.12603200 |
| C  | 8.63941300  | 0.84623000  | -2.58120600 |
| C  | 9.04751300  | 1.91260600  | -1.76063000 |
| C  | 8.49529600  | 1.99230600  | -0.47211600 |
| C  | 7.57486700  | 1.05175100  | -0.01813100 |
| H  | 7.42077400  | -0.90834500 | -2.77914000 |
| H  | 9.04651300  | 0.74765500  | -3.58285400 |
| H  | 8.79354600  | 2.80835600  | 0.18151500  |
| H  | 7.15201900  | 1.14803100  | 0.97761900  |
| C  | 10.01499700 | 2.93306200  | -2.18782200 |
| C  | 10.64545200 | 3.01325600  | -3.36619200 |
| H  | 10.22299600 | 3.69845800  | -1.44033700 |
| H  | 11.34386300 | 3.81826100  | -3.57183900 |
| H  | 10.49593300 | 2.29090800  | -4.16392700 |
| C  | 4.69656800  | -0.52163100 | -0.77711600 |
| C  | 6.12247400  | -0.99230800 | -0.38731700 |

|    |             |             |             |
|----|-------------|-------------|-------------|
| H  | 6.30390600  | -1.97374700 | -0.84172600 |
| H  | 6.17841500  | -1.12181400 | 0.69901700  |
| H  | 4.71827300  | -0.31090200 | -1.85346500 |
| C  | 3.61672200  | -1.56645700 | -0.54779600 |
| C  | 2.44400200  | -1.49615100 | -1.31736100 |
| C  | 3.71366000  | -2.57188600 | 0.42030100  |
| C  | 1.38419500  | -2.37260800 | -1.11219400 |
| H  | 2.35802300  | -0.72591200 | -2.07941200 |
| C  | 2.66916100  | -3.47956400 | 0.62293800  |
| H  | 4.61304500  | -2.66747200 | 1.01993200  |
| C  | 1.47696300  | -3.35270400 | -0.10680600 |
| H  | 0.47650800  | -2.26730100 | -1.69610200 |
| H  | 2.77784100  | -4.26821300 | 1.36270600  |
| Br | -1.52379200 | -3.38538800 | 2.64847400  |
| C  | 3.81351800  | 3.20408100  | 1.25015300  |
| C  | 4.01873400  | 3.18814100  | -0.13080500 |
| C  | 4.28283200  | 1.98350100  | -0.78476300 |
| C  | 4.34713300  | 0.78291200  | -0.07077400 |
| C  | 4.13284200  | 0.80945200  | 1.31206500  |
| C  | 3.86911000  | 2.00878200  | 1.97079600  |
| H  | 3.60528300  | 4.13975500  | 1.76139500  |
| H  | 3.97950100  | 4.11300500  | -0.69964700 |
| H  | 4.46192400  | 1.97652100  | -1.85670600 |
| H  | 4.14693100  | -0.11584000 | 1.87908000  |
| H  | 3.67839900  | 2.00253000  | 3.03920900  |
| Ni | -0.06958600 | -3.71624500 | 0.90086500  |

#### Im4d

SCF Energy (a.u.) = -2438.396920

Thermal correction to Gibbs free energy (a.u.) = 0.815135

Charge = 0, Multiplicity = 1

|   |             |             |             |
|---|-------------|-------------|-------------|
| C | -4.09258300 | -3.39133700 | -1.21048400 |
| C | -3.14385300 | -3.41427500 | -2.23628700 |
| C | -1.89649400 | -3.99807700 | -2.05051100 |

|   |             |             |             |
|---|-------------|-------------|-------------|
| C | -1.53364300 | -4.55403400 | -0.81052000 |
| C | -2.52344100 | -4.60296100 | 0.19273600  |
| C | -3.77998700 | -4.05095500 | -0.01216600 |
| H | -3.37289800 | -2.93204800 | -3.18273900 |
| H | -1.19302100 | -3.99268800 | -2.87644900 |
| H | -2.27080200 | -5.03504900 | 1.15667100  |
| H | -4.50935600 | -4.07250500 | 0.79377800  |
| C | -0.16832500 | -5.01536900 | -0.50488900 |
| C | 0.83204200  | -5.27513800 | -1.63084300 |
| H | -0.12734100 | -5.73645000 | 0.31196400  |
| H | 1.40744200  | -6.18362200 | -1.43334000 |
| H | 0.35885600  | -5.38931600 | -2.61258900 |
| C | -5.26493800 | -1.28700000 | -0.40157200 |
| C | -5.32624000 | -2.53675400 | -1.34420600 |
| H | -5.41965900 | -2.19536900 | -2.38070500 |
| H | -6.23091100 | -3.11075600 | -1.11062800 |
| H | -5.52873800 | -1.65050500 | 0.60146800  |
| C | -3.84524800 | -0.75503700 | -0.29700100 |
| C | -3.07788700 | -1.05165000 | 0.83127800  |
| C | -3.23912800 | -0.03429500 | -1.33212300 |
| C | -1.75179800 | -0.64309300 | 0.93853900  |
| H | -3.51865900 | -1.62525600 | 1.64143400  |
| C | -1.91736000 | 0.39248200  | -1.21904500 |
| H | -3.81346100 | 0.21783600  | -2.21951100 |
| C | -1.15175700 | 0.10769200  | -0.07885200 |
| H | -1.19810000 | -0.90246100 | 1.82992900  |
| H | -1.48035100 | 0.99128800  | -2.01464500 |
| C | -8.18066600 | 1.79171500  | -1.36706100 |
| C | -8.39480500 | 0.47608500  | -1.77543700 |
| C | -7.45572200 | -0.51490600 | -1.48141300 |
| C | -6.28559800 | -0.21289600 | -0.77295700 |
| C | -6.08741400 | 1.11463300  | -0.36336100 |
| C | -7.02038800 | 2.10717600  | -0.65750100 |
| H | -8.90722700 | 2.56455500  | -1.60179200 |

|    |             |             |             |
|----|-------------|-------------|-------------|
| H  | -9.29286000 | 0.21562500  | -2.32926900 |
| H  | -7.64717100 | -1.53071200 | -1.81120700 |
| H  | -5.18205400 | 1.37463200  | 0.17428000  |
| H  | -6.83150900 | 3.12926200  | -0.34267200 |
| C  | 0.25406100  | 1.97574600  | 1.01367400  |
| C  | 0.22069200  | 0.71974500  | 0.08299700  |
| H  | 0.95759200  | -0.00781900 | 0.43405000  |
| H  | 0.56857000  | 1.05751700  | -0.89981200 |
| C  | -0.91491100 | 2.88256300  | 0.66364500  |
| C  | -0.79392600 | 3.81003900  | -0.37463700 |
| C  | -2.16266500 | 2.73728300  | 1.28392500  |
| C  | -1.88485700 | 4.56857400  | -0.80644800 |
| H  | 0.16748000  | 3.93926800  | -0.86663200 |
| C  | -3.26506200 | 3.48431800  | 0.87350800  |
| H  | -2.27733100 | 2.02161900  | 2.09011100  |
| C  | -3.10806200 | 4.38619000  | -0.17396000 |
| H  | -1.77969200 | 5.28311500  | -1.61491500 |
| H  | -4.22628800 | 3.36213200  | 1.35973800  |
| Br | -4.65547600 | 5.43184200  | -0.77009800 |
| C  | 0.72383900  | 1.34589700  | 5.28835600  |
| C  | 0.79060300  | 0.25601600  | 4.42299700  |
| C  | 0.62406100  | 0.43526700  | 3.04791100  |
| C  | 0.36680900  | 1.69855600  | 2.50982900  |
| C  | 0.30240000  | 2.78801300  | 3.39316700  |
| C  | 0.48309200  | 2.61911800  | 4.76415500  |
| H  | 0.85643500  | 1.20905000  | 6.35798100  |
| H  | 0.98050400  | -0.74388300 | 4.80339000  |
| H  | 0.72598600  | -0.43300900 | 2.41143300  |
| H  | 0.10777700  | 3.78084600  | 2.99664800  |
| H  | 0.43110500  | 3.48102600  | 5.42407800  |
| H  | 1.17546200  | 2.50652300  | 0.74155100  |
| C  | 6.61930600  | 0.48134500  | -1.49705100 |
| C  | 6.73028200  | 1.18904100  | -2.70264200 |
| C  | 7.38857200  | 2.41121400  | -2.76248500 |

|    |            |             |             |
|----|------------|-------------|-------------|
| C  | 7.96578800 | 2.97629500  | -1.61113200 |
| C  | 7.85403400 | 2.26210400  | -0.40758100 |
| C  | 7.19236400 | 1.03853400  | -0.35005700 |
| H  | 6.29257400 | 0.77178400  | -3.60714300 |
| H  | 7.45829900 | 2.93068100  | -3.71325400 |
| H  | 8.28996000 | 2.67839800  | 0.49719400  |
| H  | 7.10311500 | 0.51723300  | 0.59883500  |
| C  | 8.67159100 | 4.26537400  | -1.61436500 |
| C  | 8.87698500 | 5.07702400  | -2.65908700 |
| H  | 9.05994000 | 4.56959900  | -0.64258400 |
| H  | 9.41511200 | 6.01228400  | -2.54176400 |
| H  | 8.52418000 | 4.84782600  | -3.66084500 |
| C  | 4.31266100 | -0.54033600 | -1.24675600 |
| C  | 5.83343000 | -0.80340700 | -1.43261900 |
| H  | 5.97888100 | -1.38196100 | -2.35331400 |
| H  | 6.19655200 | -1.41514400 | -0.59962900 |
| H  | 4.01441300 | 0.15342100  | -2.04270000 |
| C  | 3.45879300 | -1.78745600 | -1.39839800 |
| C  | 2.11782000 | -1.64853000 | -1.74362100 |
| C  | 3.95870200 | -3.08744800 | -1.17003600 |
| C  | 1.26034700 | -2.76156900 | -1.83583000 |
| H  | 1.71708800 | -0.66025800 | -1.94305500 |
| C  | 3.13501100 | -4.19753600 | -1.25777600 |
| H  | 5.00219700 | -3.22702900 | -0.91076300 |
| C  | 1.76538200 | -4.06758600 | -1.58917900 |
| H  | 0.25022900 | -2.61290000 | -2.19905600 |
| H  | 3.53644700 | -5.18899600 | -1.06775400 |
| Br | 0.43559400 | -3.42120900 | 2.44367000  |
| C  | 3.72097100 | 1.47770300  | 2.54050700  |
| C  | 3.81170600 | 2.20977300  | 1.35720600  |
| C  | 3.97303900 | 1.55185000  | 0.13607200  |
| C  | 4.04989200 | 0.15637500  | 0.08191500  |
| C  | 3.96056700 | -0.57118900 | 1.27610300  |
| C  | 3.79912300 | 0.08451500  | 2.49532600  |

|    |            |             |             |
|----|------------|-------------|-------------|
| H  | 3.55752300 | 1.98247500  | 3.48726600  |
| H  | 3.75176300 | 3.29439700  | 1.38124000  |
| H  | 4.06066400 | 2.12621200  | -0.78223200 |
| H  | 4.00022100 | -1.65674200 | 1.25455100  |
| H  | 3.70420200 | -0.49390300 | 3.40865500  |
| Ni | 0.79033900 | -3.48803300 | 0.17664400  |

**im5d**

SCF Energy (a.u.) = -2579.441448

Thermal correction to Gibbs free energy (a.u.) = 0.883168

Charge = 0, Multiplicity = 1

|   |             |             |             |
|---|-------------|-------------|-------------|
| C | -4.13295100 | -3.39995900 | -1.20395500 |
| C | -3.11074100 | -3.38182000 | -2.15659800 |
| C | -1.86285500 | -3.93098500 | -1.88777500 |
| C | -1.56869500 | -4.49274900 | -0.63299600 |
| C | -2.63351700 | -4.60340400 | 0.28232700  |
| C | -3.88916200 | -4.07773600 | -0.00137200 |
| H | -3.28176700 | -2.88758700 | -3.10919500 |
| H | -1.10223000 | -3.88813300 | -2.66003500 |
| H | -2.45311200 | -5.07759800 | 1.24310500  |
| H | -4.67618300 | -4.14255000 | 0.74679200  |
| C | -0.20378500 | -4.89992500 | -0.23557400 |
| C | 0.81471600  | -5.28424100 | -1.31662000 |
| H | -0.20830700 | -5.57829000 | 0.62196700  |
| H | 1.33758000  | -6.20643000 | -1.04604600 |
| H | 0.35556100  | -5.44232000 | -2.29986200 |
| C | -5.32836000 | -1.26596400 | -0.51881400 |
| C | -5.36475500 | -2.55584000 | -1.40996400 |
| H | -5.42595400 | -2.25590300 | -2.46179800 |
| H | -6.27729600 | -3.11858800 | -1.17950400 |
| H | -5.61153300 | -1.59139300 | 0.49229000  |
| C | -3.90911400 | -0.73413700 | -0.40786600 |
| C | -3.13799000 | -1.07243800 | 0.70633600  |
| C | -3.29799800 | -0.00074100 | -1.43053900 |

|    |             |             |             |
|----|-------------|-------------|-------------|
| C  | -1.79989400 | -0.70912900 | 0.80414500  |
| H  | -3.58666400 | -1.65288100 | 1.50673300  |
| C  | -1.96496100 | 0.39316300  | -1.32050100 |
| H  | -3.87420000 | 0.28245400  | -2.30715300 |
| C  | -1.19369200 | 0.05294800  | -0.20068600 |
| H  | -1.23144000 | -1.02691800 | 1.66547300  |
| H  | -1.52228200 | 1.00248900  | -2.10493900 |
| C  | -8.21823600 | 1.77915300  | -1.64948200 |
| C  | -8.39836000 | 0.46088000  | -2.06499100 |
| C  | -7.46734900 | -0.52118500 | -1.71839800 |
| C  | -6.33990200 | -0.20705400 | -0.94937900 |
| C  | -6.17561000 | 1.12379800  | -0.53384700 |
| C  | -7.10002600 | 2.10714000  | -0.87991800 |
| H  | -8.93828300 | 2.54474300  | -1.92478900 |
| H  | -9.26314300 | 0.19102500  | -2.66541200 |
| H  | -7.63131300 | -1.53949500 | -2.05492300 |
| H  | -5.30135600 | 1.39332500  | 0.04953900  |
| H  | -6.93659200 | 3.13123500  | -0.55735500 |
| C  | 0.27258000  | 1.83616100  | 0.94864300  |
| C  | 0.19691800  | 0.61936000  | -0.03087200 |
| H  | 0.91215600  | -0.14198300 | 0.29169500  |
| H  | 0.54868000  | 0.98135600  | -1.00377200 |
| C  | -0.89156900 | 2.77147000  | 0.66306000  |
| C  | -0.78609000 | 3.73320500  | -0.34523600 |
| C  | -2.12638300 | 2.61400300  | 1.30576800  |
| C  | -1.88139700 | 4.51130900  | -0.72875500 |
| H  | 0.16501800  | 3.87201000  | -0.85431600 |
| C  | -3.23337600 | 3.37787000  | 0.94194100  |
| H  | -2.22879800 | 1.87161900  | 2.08892200  |
| C  | -3.09279400 | 4.31240200  | -0.07878600 |
| H  | -1.78914800 | 5.25128100  | -1.51563100 |
| H  | -4.18603200 | 3.24204100  | 1.44133600  |
| Br | -4.64911200 | 5.37937700  | -0.61231000 |
| C  | 0.83269200  | 1.04498800  | 5.18622400  |

|   |            |             |             |
|---|------------|-------------|-------------|
| C | 0.83922200 | -0.01670000 | 4.28415900  |
| C | 0.64145900 | 0.20778100  | 2.91889900  |
| C | 0.41484300 | 1.49735400  | 2.43002000  |
| C | 0.40733800 | 2.55852400  | 3.34978100  |
| C | 0.61758400 | 2.34116600  | 4.70960100  |
| H | 0.99042300 | 0.86923600  | 6.24681700  |
| H | 1.00707500 | -1.03337800 | 4.62901300  |
| H | 0.68213300 | -0.65218600 | 2.26394400  |
| H | 0.23457900 | 3.56922200  | 2.98967700  |
| H | 0.60892600 | 3.18257400  | 5.39742700  |
| H | 1.19582600 | 2.36499100  | 0.67878300  |
| C | 6.86487400 | 0.21866100  | -1.33704100 |
| C | 7.10508800 | 0.82270700  | -2.57947000 |
| C | 7.81393700 | 2.01394500  | -2.67649100 |
| C | 8.31319000 | 2.65135700  | -1.52668800 |
| C | 8.07089700 | 2.04144700  | -0.28545600 |
| C | 7.35958500 | 0.84855000  | -0.19088900 |
| H | 6.72937800 | 0.34800900  | -3.48349200 |
| H | 7.98413800 | 2.45221100  | -3.65509600 |
| H | 8.44423600 | 2.51562200  | 0.61887400  |
| H | 7.16968000 | 0.40922000  | 0.78428700  |
| C | 9.06767900 | 3.91185600  | -1.56836200 |
| C | 9.39634400 | 4.62744000  | -2.65113100 |
| H | 9.38148300 | 4.28225300  | -0.59258300 |
| H | 9.95922700 | 5.55098800  | -2.55996100 |
| H | 9.12375300 | 4.32809600  | -3.65940000 |
| C | 4.51195900 | -0.70420000 | -1.17300100 |
| C | 6.02823300 | -1.03205000 | -1.24190400 |
| H | 6.20960500 | -1.67459700 | -2.11230200 |
| H | 6.31418200 | -1.60039800 | -0.34994800 |
| H | 4.28896500 | -0.06521400 | -2.03670000 |
| C | 3.61344900 | -1.92623900 | -1.27491600 |
| C | 2.28347000 | -1.74555800 | -1.63712500 |
| C | 4.05398000 | -3.23498200 | -0.98225300 |

|    |             |             |             |
|----|-------------|-------------|-------------|
| C  | 1.37210400  | -2.81984500 | -1.66680700 |
| H  | 1.93154200  | -0.75164300 | -1.89391300 |
| C  | 3.17796000  | -4.30765800 | -1.01695500 |
| H  | 5.09045100  | -3.41009000 | -0.71562000 |
| C  | 1.81315100  | -4.13078800 | -1.34434500 |
| H  | 0.37321000  | -2.64259800 | -2.04745600 |
| H  | 3.53418600  | -5.30700500 | -0.78150100 |
| C  | 3.76936600  | 1.61785800  | 2.40791200  |
| C  | 3.87251300  | 2.24904400  | 1.16874300  |
| C  | 4.08441200  | 1.49456200  | 0.01239000  |
| C  | 4.19646000  | 0.10276000  | 0.07947700  |
| C  | 4.08936200  | -0.52319900 | 1.32851200  |
| C  | 3.88077900  | 0.22797800  | 2.48338200  |
| H  | 3.57426100  | 2.19583800  | 3.30528700  |
| H  | 3.78859500  | 3.33017800  | 1.09856300  |
| H  | 4.18611500  | 1.99135000  | -0.94881800 |
| H  | 4.15721400  | -1.60585700 | 1.39641900  |
| H  | 3.77675500  | -0.27087000 | 3.44120300  |
| Ni | 0.81528100  | -3.37509800 | 0.36589500  |
| O  | 0.34001700  | -2.98224300 | 2.01843300  |
| C  | -0.18458900 | -3.74884500 | 3.06377100  |
| C  | -1.49469600 | -3.15899100 | 3.58758100  |
| H  | 0.54904600  | -3.80100400 | 3.88772400  |
| H  | -0.36091400 | -4.79065600 | 2.74500600  |
| H  | -1.88651400 | -3.74890900 | 4.42639800  |
| H  | -1.33938200 | -2.13030100 | 3.93090300  |
| H  | -2.24438400 | -3.14299900 | 2.79020400  |

**im6d**

SCF Energy (a.u.) = -3183.171370

Thermal correction to Gibbs free energy (a.u.) = 1.115907

Charge = 0, Multiplicity = 1

|   |             |             |             |
|---|-------------|-------------|-------------|
| C | -2.45829300 | -4.00858200 | -0.97259500 |
| C | -1.49507100 | -4.12520300 | -1.97930500 |

|   |             |             |             |
|---|-------------|-------------|-------------|
| C | -0.15419300 | -4.36676000 | -1.68013800 |
| C | 0.28412000  | -4.48911700 | -0.35101800 |
| C | -0.68966900 | -4.36111200 | 0.65912900  |
| C | -2.02450200 | -4.13565700 | 0.35642500  |
| H | -1.80015200 | -4.03076300 | -3.01877600 |
| H | 0.55188800  | -4.45533000 | -2.49983500 |
| H | -0.37089300 | -4.41867100 | 1.69508000  |
| H | -2.74212400 | -4.04897200 | 1.16791900  |
| C | 1.69631700  | -4.70713800 | 0.04290800  |
| C | 2.72493700  | -5.17164700 | -0.99667400 |
| H | 1.77534600  | -5.23313800 | 0.99677000  |
| H | 3.33138900  | -5.99403800 | -0.60559400 |
| H | 2.27305800  | -5.51417400 | -1.93450400 |
| C | -4.58280100 | -2.61025600 | -0.59055500 |
| C | -3.91685200 | -3.80190600 | -1.31444100 |
| H | -4.01719600 | -3.66770900 | -2.39779800 |
| H | -4.47295800 | -4.71458700 | -1.06075600 |
| H | -4.49880700 | -2.80198700 | 0.48759100  |
| C | -3.85752500 | -1.30250600 | -0.85951700 |
| C | -3.14598200 | -0.65862100 | 0.15330400  |
| C | -3.93410100 | -0.68258100 | -2.11151100 |
| C | -2.54574900 | 0.57810400  | -0.06624900 |
| H | -3.04294300 | -1.13184200 | 1.12388200  |
| C | -3.34354700 | 0.56025700  | -2.32432800 |
| H | -4.50189900 | -1.15383900 | -2.90965900 |
| C | -2.64940800 | 1.22040400  | -1.30328100 |
| H | -2.00154300 | 1.04810500  | 0.74218500  |
| H | -3.44252100 | 1.04029000  | -3.29500800 |
| C | -8.82193200 | -2.06703600 | -1.39690100 |
| C | -8.16111600 | -3.17469900 | -1.92192800 |
| C | -6.79796600 | -3.36778900 | -1.67459900 |
| C | -6.07418700 | -2.45837400 | -0.89735200 |
| C | -6.75384200 | -1.34407900 | -0.37770500 |
| C | -8.10975700 | -1.14784300 | -0.62068000 |

|    |             |             |             |
|----|-------------|-------------|-------------|
| H  | -9.87936000 | -1.91406100 | -1.59389300 |
| H  | -8.70103800 | -3.89395800 | -2.53215300 |
| H  | -6.30791900 | -4.23615600 | -2.10129000 |
| H  | -6.20029800 | -0.61015800 | 0.20126100  |
| H  | -8.60675300 | -0.26975000 | -0.21899400 |
| C  | -2.58928100 | 3.70996800  | -0.57318300 |
| C  | -2.08339300 | 2.60059900  | -1.54928800 |
| H  | -0.98884700 | 2.57841000  | -1.55325800 |
| H  | -2.37839300 | 2.91052400  | -2.55761400 |
| C  | -4.10367000 | 3.59803100  | -0.45773200 |
| C  | -4.91291700 | 4.18001300  | -1.43844700 |
| C  | -4.71994600 | 2.82291900  | 0.53312400  |
| C  | -6.29580100 | 3.98673000  | -1.45610000 |
| H  | -4.45653700 | 4.78830400  | -2.21592100 |
| C  | -6.09843100 | 2.61465300  | 0.53771800  |
| H  | -4.11745000 | 2.36794800  | 1.30978300  |
| C  | -6.86519900 | 3.19680700  | -0.46530500 |
| H  | -6.90999200 | 4.44032000  | -2.22556100 |
| H  | -6.56133100 | 2.00649500  | 1.30667300  |
| Br | -8.80303900 | 2.89870800  | -0.47662200 |
| C  | -0.49285700 | 4.13932600  | 3.21672700  |
| C  | 0.05537600  | 3.35011600  | 2.20754300  |
| C  | -0.62307400 | 3.18628100  | 0.99773700  |
| C  | -1.86115500 | 3.79797400  | 0.76898600  |
| C  | -2.39723600 | 4.59392600  | 1.79380000  |
| C  | -1.72483000 | 4.76227500  | 3.00315400  |
| H  | 0.02944500  | 4.26697600  | 4.16111100  |
| H  | 0.99847100  | 2.83338100  | 2.35200200  |
| H  | -0.17101900 | 2.55878800  | 0.24120900  |
| H  | -3.35491500 | 5.08315900  | 1.64206000  |
| H  | -2.16547500 | 5.38168700  | 3.77983100  |
| H  | -2.38108300 | 4.66111600  | -1.08456300 |
| C  | 7.96648500  | 1.09583300  | -1.15463100 |
| C  | 8.30837900  | 1.60674300  | -2.41510200 |

|   |             |             |             |
|---|-------------|-------------|-------------|
| C | 8.85559500  | 2.87638300  | -2.55382900 |
| C | 9.08485900  | 3.68950500  | -1.42940100 |
| C | 8.74359500  | 3.17193200  | -0.16979900 |
| C | 8.19374700  | 1.90014900  | -0.03405900 |
| H | 8.14039100  | 0.99642700  | -3.29999100 |
| H | 9.11014000  | 3.23941100  | -3.54487600 |
| H | 8.90863600  | 3.78168600  | 0.71510200  |
| H | 7.91936000  | 1.53282600  | 0.95082500  |
| C | 9.65872800  | 5.03964600  | -1.51579500 |
| C | 10.04686000 | 5.68939500  | -2.62020400 |
| H | 9.76836500  | 5.54537700  | -0.55658400 |
| H | 10.45869800 | 6.69196200  | -2.56220400 |
| H | 9.97287000  | 5.25674800  | -3.61411300 |
| C | 5.76661800  | -0.16263300 | -1.25845100 |
| C | 7.29985900  | -0.25027100 | -1.02870100 |
| H | 7.72428500  | -0.94897000 | -1.76036900 |
| H | 7.48875900  | -0.66442300 | -0.03193500 |
| H | 5.62027200  | 0.31935900  | -2.23355700 |
| C | 5.07587700  | -1.51684900 | -1.31112700 |
| C | 3.77447200  | -1.57603300 | -1.79954900 |
| C | 5.66507500  | -2.70694700 | -0.83452500 |
| C | 3.02296000  | -2.76506200 | -1.74705200 |
| H | 3.30469500  | -0.68297700 | -2.19379200 |
| C | 4.94492500  | -3.89076800 | -0.78186500 |
| H | 6.68917600  | -2.70023500 | -0.47773900 |
| C | 3.59653000  | -3.94181000 | -1.20383700 |
| H | 2.03766500  | -2.78239300 | -2.19820900 |
| H | 5.40704900  | -4.79200500 | -0.38791200 |
| C | 4.04261300  | 2.42728800  | 1.75800700  |
| C | 4.38835100  | 2.93782200  | 0.50545600  |
| C | 4.92347100  | 2.09524200  | -0.47014400 |
| C | 5.11986600  | 0.73491800  | -0.20950900 |
| C | 4.76541000  | 0.23194800  | 1.04802300  |
| C | 4.23017700  | 1.06972300  | 2.02484000  |

|    |             |             |             |
|----|-------------|-------------|-------------|
| H  | 3.61672700  | 3.07984100  | 2.51483700  |
| H  | 4.24030300  | 3.99139800  | 0.28570200  |
| H  | 5.20684900  | 2.49873600  | -1.43835400 |
| H  | 4.88575100  | -0.82553500 | 1.26138700  |
| H  | 3.93821100  | 0.65539900  | 2.98391800  |
| Ni | 2.47874200  | -2.99055100 | 0.37098500  |
| O  | 2.07296100  | -2.68747200 | 2.09003600  |
| C  | 2.74155600  | -3.38997600 | 3.10079800  |
| C  | 4.22032500  | -3.01702300 | 3.22380800  |
| H  | 2.65593200  | -4.48287400 | 2.95435800  |
| H  | 2.24007700  | -3.17398100 | 4.06168400  |
| H  | 4.70384100  | -3.55683800 | 4.04882800  |
| H  | 4.75158700  | -3.25543100 | 2.29396100  |
| H  | 4.32345800  | -1.94083000 | 3.40547500  |
| C  | 0.92281800  | 0.42426900  | -2.81951200 |
| C  | 1.62183800  | 1.17353600  | -1.86672400 |
| C  | 1.52531700  | 0.84309300  | -0.51435700 |
| C  | 0.71093700  | -0.21833800 | -0.08508800 |
| C  | 0.02705000  | -0.96655000 | -1.05754300 |
| C  | 0.13519600  | -0.65661700 | -2.41254500 |
| H  | 0.99114900  | 0.68323400  | -3.87334900 |
| H  | 2.24831800  | 2.00648500  | -2.17488200 |
| H  | 2.07736400  | 1.41844300  | 0.21963700  |
| H  | -0.61783100 | -1.77544600 | -0.74140600 |
| H  | -0.42053200 | -1.23802000 | -3.14264300 |
| C  | 1.00377500  | -0.03459800 | 3.74019600  |
| C  | -0.69219500 | -1.73007400 | 3.13974000  |
| C  | -0.39637400 | -0.56311300 | 4.09316400  |
| H  | 1.76451000  | -0.77363100 | 4.01826800  |
| H  | -1.72802800 | -2.06901700 | 3.26334600  |
| B  | 0.47089900  | -0.49555500 | 1.43482000  |
| O  | 1.15647400  | 0.25228100  | 2.35499800  |
| O  | -0.52922300 | -1.36160400 | 1.77729000  |
| H  | 1.20599100  | 0.89415900  | 4.28721600  |

|   |             |             |            |
|---|-------------|-------------|------------|
| H | -0.01885400 | -2.56919900 | 3.34125900 |
| C | -0.39069200 | -1.07575900 | 5.53767100 |
| H | 0.34754500  | -1.87480600 | 5.67568900 |
| H | -0.15105300 | -0.26740100 | 6.23876800 |
| H | -1.37465600 | -1.47267300 | 5.81412900 |
| C | -1.45025000 | 0.54272800  | 3.92572100 |
| H | -2.45164400 | 0.15493100  | 4.14831600 |
| H | -1.25094400 | 1.38026700  | 4.60317000 |
| H | -1.45850400 | 0.94515900  | 2.91056800 |

### TS3d

SCF Energy (a.u.) = -3183.170200

Thermal correction to Gibbs free energy (a.u.) = 1.117795

Charge = 0, Multiplicity = 1

|   |             |            |             |
|---|-------------|------------|-------------|
| C | 2.57226700  | 3.97449900 | -0.75657200 |
| C | 1.61424300  | 4.10309900 | -1.76768300 |
| C | 0.26570600  | 4.29698600 | -1.47160500 |
| C | -0.18779900 | 4.35442800 | -0.14265600 |
| C | 0.77981800  | 4.21199500 | 0.87074900  |
| C | 2.12355400  | 4.03596300 | 0.57153400  |
| H | 1.93054400  | 4.05474300 | -2.80685100 |
| H | -0.43895600 | 4.38787900 | -2.29250900 |
| H | 0.45752500  | 4.22916000 | 1.90753500  |
| H | 2.83781700  | 3.94176000 | 1.38555700  |
| C | -1.61008600 | 4.51157200 | 0.23671400  |
| C | -2.60028100 | 5.15228200 | -0.74834000 |
| H | -1.71463800 | 4.90009000 | 1.25242300  |
| H | -3.11607000 | 6.00492900 | -0.29527000 |
| H | -2.11973900 | 5.50741800 | -1.66572700 |
| C | 4.70268500  | 2.56839500 | -0.45702100 |
| C | 4.04020000  | 3.81726600 | -1.08535900 |
| H | 4.16473100  | 3.78039200 | -2.17381200 |
| H | 4.58057900  | 4.70743900 | -0.73546500 |
| H | 4.54747100  | 2.63848400 | 0.62790500  |

|   |             |             |             |
|---|-------------|-------------|-------------|
| C | 4.02166000  | 1.28726200  | -0.91195000 |
| C | 3.07414900  | 0.66398100  | -0.09820700 |
| C | 4.32869200  | 0.69875900  | -2.14380600 |
| C | 2.46088500  | -0.52091500 | -0.49273900 |
| H | 2.78277900  | 1.11487100  | 0.84330500  |
| C | 3.72371700  | -0.49594300 | -2.52849800 |
| H | 5.07642200  | 1.15654600  | -2.78573800 |
| C | 2.78761000  | -1.13320100 | -1.70547700 |
| H | 1.72613100  | -0.97224000 | 0.15896000  |
| H | 4.00328900  | -0.95738800 | -3.47267700 |
| C | 8.99221800  | 2.20801200  | -1.04163900 |
| C | 8.31698700  | 3.29468600  | -1.59134100 |
| C | 6.93617500  | 3.43280500  | -1.41318600 |
| C | 6.21069600  | 2.48873900  | -0.68106600 |
| C | 6.90494400  | 1.39596200  | -0.13634800 |
| C | 8.27766700  | 1.25361600  | -0.31078100 |
| H | 10.06364400 | 2.09826800  | -1.18429300 |
| H | 8.85952300  | 4.04027700  | -2.16660700 |
| H | 6.43363600  | 4.28529900  | -1.85730600 |
| H | 6.34891500  | 0.63673200  | 0.40715000  |
| H | 8.78656500  | 0.39118100  | 0.10914300  |
| C | 2.62749400  | -3.64789500 | -1.13056300 |
| C | 2.22533700  | -2.48087800 | -2.09242100 |
| H | 1.13584400  | -2.43918600 | -2.19329300 |
| H | 2.61187000  | -2.74182500 | -3.08352300 |
| C | 4.11608600  | -3.53235000 | -0.83182600 |
| C | 5.04549400  | -4.06920900 | -1.72721200 |
| C | 4.59580500  | -2.78846500 | 0.25450600  |
| C | 6.41788400  | -3.86237600 | -1.56874200 |
| H | 4.69526200  | -4.65136000 | -2.57646400 |
| C | 5.95989700  | -2.56743300 | 0.43427500  |
| H | 3.89629600  | -2.36543800 | 0.96533300  |
| C | 6.85098300  | -3.10511400 | -0.48796400 |
| H | 7.12749400  | -4.28069400 | -2.27338400 |

|    |              |             |             |
|----|--------------|-------------|-------------|
| H  | 6.31757100   | -1.98356200 | 1.27482300  |
| Br | 8.77187100   | -2.78871100 | -0.25104900 |
| C  | 0.14556900   | -4.34109100 | 2.37741800  |
| C  | -0.31003100  | -3.49828000 | 1.36610100  |
| C  | 0.48762000   | -3.24686900 | 0.24662600  |
| C  | 1.75749900   | -3.82113000 | 0.11644900  |
| C  | 2.20093700   | -4.66891000 | 1.14492300  |
| C  | 1.40801700   | -4.92756800 | 2.26115600  |
| H  | -0.47303200  | -4.53810200 | 3.24899000  |
| H  | -1.27539800  | -3.01170700 | 1.44846200  |
| H  | 0.09860600   | -2.58198600 | -0.51377300 |
| H  | 3.18114200   | -5.12986800 | 1.06804600  |
| H  | 1.77842100   | -5.58821100 | 3.04063500  |
| H  | 2.49082000   | -4.56844100 | -1.71640400 |
| C  | -8.22275900  | -0.76410600 | -0.97586800 |
| C  | -8.59855100  | -1.26611500 | -2.23037200 |
| C  | -9.20171500  | -2.51137800 | -2.35686400 |
| C  | -9.45563200  | -3.30799900 | -1.22578400 |
| C  | -9.08075100  | -2.79914300 | 0.02770900  |
| C  | -8.47463400  | -1.55181200 | 0.15109900  |
| H  | -8.41249900  | -0.66840200 | -3.12023000 |
| H  | -9.48125000  | -2.86809600 | -3.34344300 |
| H  | -9.26409800  | -3.39636200 | 0.91753400  |
| H  | -8.17603900  | -1.19130100 | 1.13145800  |
| C  | -10.08829000 | -4.63237800 | -1.29943200 |
| C  | -10.51231400 | -5.27129600 | -2.39692300 |
| H  | -10.21262500 | -5.12705200 | -0.33626800 |
| H  | -10.96687500 | -6.25463100 | -2.32961000 |
| H  | -10.42664900 | -4.84844400 | -3.39409800 |
| C  | -5.97322000  | 0.40018400  | -1.12676200 |
| C  | -7.49662700  | 0.55188600  | -0.86268900 |
| H  | -7.90550300  | 1.27207300  | -1.58245200 |
| H  | -7.64686600  | 0.96840900  | 0.13931000  |
| H  | -5.86698600  | -0.10013200 | -2.09738400 |

|    |             |             |             |
|----|-------------|-------------|-------------|
| C  | -5.23179500 | 1.72399700  | -1.20744900 |
| C  | -3.99042100 | 1.75707400  | -1.83543600 |
| C  | -5.69879800 | 2.90196800  | -0.58545800 |
| C  | -3.15534600 | 2.88949300  | -1.75217800 |
| H  | -3.62135100 | 0.87688400  | -2.34801800 |
| C  | -4.89636300 | 4.02779200  | -0.49727700 |
| H  | -6.68379800 | 2.92130400  | -0.13212400 |
| C  | -3.58707400 | 4.03073000  | -1.03099000 |
| H  | -2.21676000 | 2.89667800  | -2.29608000 |
| H  | -5.25498400 | 4.91383700  | 0.01973000  |
| C  | -4.23158700 | -2.20048300 | 1.87653100  |
| C  | -4.68784300 | -2.72615400 | 0.66603800  |
| C  | -5.23022200 | -1.88195700 | -0.30446500 |
| C  | -5.33105100 | -0.50468800 | -0.07764400 |
| C  | -4.86962600 | 0.01093900  | 1.13968400  |
| C  | -4.31875100 | -0.82667400 | 2.10778200  |
| H  | -3.79137500 | -2.85299700 | 2.62509000  |
| H  | -4.61557200 | -3.79266200 | 0.47197300  |
| H  | -5.59160300 | -2.29643900 | -1.24148200 |
| H  | -4.90434500 | 1.07960800  | 1.32398800  |
| H  | -3.92216100 | -0.39861900 | 3.02166700  |
| Ni | -2.43959500 | 2.77586100  | 0.30421900  |
| O  | -2.00651100 | 2.09183500  | 1.91304900  |
| C  | -2.19742300 | 2.76430800  | 3.12625000  |
| C  | -3.62786400 | 3.26763700  | 3.31941600  |
| H  | -1.49527300 | 3.61290900  | 3.22169100  |
| H  | -1.95234600 | 2.07000600  | 3.94458300  |
| H  | -3.74603400 | 3.76983300  | 4.28841700  |
| H  | -3.89731800 | 3.97432700  | 2.52571500  |
| H  | -4.33210500 | 2.42907200  | 3.27425200  |
| C  | -1.19383200 | -0.24201900 | -2.72417700 |
| C  | -1.92616600 | -0.97630700 | -1.78453400 |
| C  | -1.77406800 | -0.71528900 | -0.42226800 |
| C  | -0.87950400 | 0.26577200  | 0.03714000  |

|   |             |             |             |
|---|-------------|-------------|-------------|
| C | -0.17211100 | 1.00707900  | -0.92425700 |
| C | -0.32618100 | 0.76289200  | -2.28962400 |
| H | -1.29880900 | -0.45343600 | -3.78576200 |
| H | -2.61412200 | -1.75277300 | -2.10927000 |
| H | -2.34078900 | -1.29130900 | 0.29762100  |
| H | 0.53982600  | 1.75027300  | -0.59463200 |
| H | 0.25911400  | 1.33344500  | -3.00553500 |
| C | -0.60886600 | -0.61153200 | 3.77257400  |
| C | 1.01727000  | 1.17467300  | 3.24070300  |
| C | 0.86079900  | -0.18472800 | 3.93837600  |
| H | -1.24709700 | 0.00172900  | 4.42494000  |
| H | 2.06929700  | 1.48603900  | 3.25030700  |
| B | -0.54525400 | 0.42392800  | 1.56998200  |
| O | -1.08177900 | -0.50694800 | 2.43841900  |
| O | 0.60366000  | 1.12668600  | 1.88701300  |
| H | -0.72981800 | -1.65818200 | 4.07759300  |
| H | 0.43777100  | 1.94191900  | 3.77300300  |
| C | 1.17853600  | -0.03364900 | 5.43018800  |
| H | 0.54290600  | 0.72511400  | 5.90280800  |
| H | 1.02462000  | -0.98123300 | 5.96003400  |
| H | 2.22412700  | 0.26153000  | 5.57774200  |
| C | 1.80072900  | -1.21993000 | 3.30071700  |
| H | 2.84037600  | -0.87255400 | 3.34363700  |
| H | 1.73806100  | -2.17882800 | 3.82514500  |
| H | 1.54689400  | -1.40728200 | 2.25657400  |

**im7d**

SCF Energy (a.u.) = -3183.171602

Thermal correction to Gibbs free energy (a.u.) = 1.119602

Charge = 0, Multiplicity = 1

|   |             |            |             |
|---|-------------|------------|-------------|
| C | 2.68459900  | 3.96683900 | -0.76811200 |
| C | 1.73381900  | 4.03786900 | -1.79309900 |
| C | 0.38162100  | 4.22209700 | -1.51505500 |
| C | -0.08200500 | 4.32489000 | -0.19072900 |

|   |             |             |             |
|---|-------------|-------------|-------------|
| C | 0.87905600  | 4.24603900  | 0.83555800  |
| C | 2.22751400  | 4.08375500  | 0.55259800  |
| H | 2.05946300  | 3.94400900  | -2.82590600 |
| H | -0.32133400 | 4.25759600  | -2.34178200 |
| H | 0.55179200  | 4.30376300  | 1.86872100  |
| H | 2.93809200  | 4.03488300  | 1.37359800  |
| C | -1.51062900 | 4.44671400  | 0.16434300  |
| C | -2.49656800 | 5.09550200  | -0.81530800 |
| H | -1.65090000 | 4.79377400  | 1.19051400  |
| H | -2.96481700 | 5.98662000  | -0.38444500 |
| H | -2.01967800 | 5.39343100  | -1.75374700 |
| C | 4.76974200  | 2.51471500  | -0.43672200 |
| C | 4.15504900  | 3.78805200  | -1.06847000 |
| H | 4.30518500  | 3.76047900  | -2.15374400 |
| H | 4.70491800  | 4.66104900  | -0.69184600 |
| H | 4.56335400  | 2.56670300  | 0.64060500  |
| C | 4.08782500  | 1.25451400  | -0.94877800 |
| C | 3.03795900  | 0.68091000  | -0.22850100 |
| C | 4.48827200  | 0.64175300  | -2.14188800 |
| C | 2.41874100  | -0.48227500 | -0.67530400 |
| H | 2.66775900  | 1.14901000  | 0.67673100  |
| C | 3.87139000  | -0.52861800 | -2.57975900 |
| H | 5.31360400  | 1.06144700  | -2.71033400 |
| C | 2.83339600  | -1.11818200 | -1.84810600 |
| H | 1.60884600  | -0.89566800 | -0.09244600 |
| H | 4.22189600  | -1.00981300 | -3.48984500 |
| C | 9.07464200  | 2.10000900  | -0.82450300 |
| C | 8.43630400  | 3.18097800  | -1.42697900 |
| C | 7.05074900  | 3.33744900  | -1.31158000 |
| C | 6.28420700  | 2.41793400  | -0.59036600 |
| C | 6.94144600  | 1.33051100  | 0.00790600  |
| C | 8.31858000  | 1.16987900  | -0.10407600 |
| H | 10.14991200 | 1.97595100  | -0.91798800 |
| H | 9.01167600  | 3.90759300  | -1.99457800 |

|    |             |             |             |
|----|-------------|-------------|-------------|
| H  | 6.57692000  | 4.18464600  | -1.79593000 |
| H  | 6.35336700  | 0.59042800  | 0.54414600  |
| H  | 8.79914300  | 0.31212200  | 0.35661800  |
| C  | 2.58437700  | -3.63158100 | -1.30584100 |
| C  | 2.25428400  | -2.44661200 | -2.27440500 |
| H  | 1.17101500  | -2.37604300 | -2.41834100 |
| H  | 2.67671700  | -2.70967800 | -3.25028900 |
| C  | 4.05560900  | -3.54162100 | -0.92417800 |
| C  | 5.02728100  | -4.08806300 | -1.76688700 |
| C  | 4.48075200  | -2.80810700 | 0.19164700  |
| C  | 6.39103400  | -3.90079200 | -1.52794100 |
| H  | 4.71889900  | -4.66217200 | -2.63762300 |
| C  | 5.83477200  | -2.60629600 | 0.45083800  |
| H  | 3.74627500  | -2.37817200 | 0.86184000  |
| C  | 6.77032300  | -3.15327800 | -0.42063800 |
| H  | 7.13488600  | -4.32657700 | -2.19163300 |
| H  | 6.15073500  | -2.03029600 | 1.31325100  |
| Br | 8.67914100  | -2.86534600 | -0.07089400 |
| C  | -0.05197200 | -4.29981000 | 2.09257600  |
| C  | -0.43883200 | -3.41781600 | 1.08667300  |
| C  | 0.40224000  | -3.17932200 | -0.00384900 |
| C  | 1.65158000  | -3.80193900 | -0.10456100 |
| C  | 2.02450100  | -4.69099900 | 0.91724200  |
| C  | 1.18591900  | -4.94044300 | 2.00128200  |
| H  | -0.70383200 | -4.48234800 | 2.94268400  |
| H  | -1.38263400 | -2.88941900 | 1.15446100  |
| H  | 0.06485200  | -2.48315800 | -0.76122500 |
| H  | 2.98804900  | -5.18904900 | 0.86180600  |
| H  | 1.50308100  | -5.63251200 | 2.77703200  |
| H  | 2.46529200  | -4.54371200 | -1.90833500 |
| C  | -8.31326900 | -0.63704800 | -0.86709800 |
| C  | -8.71674500 | -1.13726000 | -2.11360400 |
| C  | -9.35747000 | -2.36520000 | -2.22388100 |
| C  | -9.62205900 | -3.14555500 | -1.08402500 |

|   |              |             |             |
|---|--------------|-------------|-------------|
| C | -9.21829400  | -2.63887400 | 0.16140900  |
| C | -8.57488200  | -1.40886800 | 0.26875300  |
| H | -8.52322000  | -0.55183600 | -3.01001500 |
| H | -9.65799900  | -2.72092000 | -3.20460500 |
| H | -9.40911000  | -3.22391200 | 1.05769900  |
| H | -8.25566100  | -1.04991800 | 1.24315700  |
| C | -10.29429200 | -4.45119100 | -1.14056100 |
| C | -10.75098200 | -5.08409400 | -2.22835000 |
| H | -10.42075300 | -4.93582100 | -0.17261300 |
| H | -11.23325900 | -6.05319500 | -2.14880300 |
| H | -10.66577900 | -4.67020300 | -3.22931500 |
| C | -6.02906100  | 0.45117100  | -1.02559300 |
| C | -7.54797200  | 0.65820000  | -0.77186900 |
| H | -7.92978500  | 1.37913000  | -1.50550500 |
| H | -7.69085300  | 1.09537500  | 0.22231300  |
| H | -5.93558600  | -0.07681100 | -1.98227600 |
| C | -5.24526400  | 1.74689500  | -1.13828500 |
| C | -4.05298000  | 1.75686700  | -1.85496700 |
| C | -5.62907900  | 2.92474900  | -0.46038400 |
| C | -3.17995100  | 2.86509000  | -1.81268200 |
| H | -3.74953400  | 0.87827500  | -2.41175900 |
| C | -4.78901400  | 4.02370200  | -0.40655000 |
| H | -6.58082800  | 2.96348200  | 0.05836600  |
| C | -3.52646100  | 4.00280800  | -1.04094400 |
| H | -2.29226000  | 2.86730500  | -2.43750900 |
| H | -5.08336100  | 4.90999800  | 0.14923200  |
| C | -4.34109000  | -2.12669600 | 2.02783900  |
| C | -4.78350600  | -2.66143500 | 0.81655300  |
| C | -5.31551700  | -1.82487200 | -0.16621100 |
| C | -5.41724200  | -0.44608900 | 0.04773500  |
| C | -4.97721200  | 0.07793600  | 1.26953800  |
| C | -4.43810700  | -0.75213900 | 2.25093100  |
| H | -3.90257600  | -2.77140200 | 2.78365900  |
| H | -4.70561400  | -3.72881900 | 0.63017700  |

|    |             |             |             |
|----|-------------|-------------|-------------|
| H  | -5.66329700 | -2.24580900 | -1.10551500 |
| H  | -5.01864800 | 1.14835300  | 1.44374500  |
| H  | -4.05050400 | -0.32162500 | 3.16770900  |
| Ni | -2.24561100 | 2.65538200  | 0.15672000  |
| O  | -1.79581500 | 1.96994700  | 1.84059300  |
| C  | -1.92603600 | 2.64760100  | 3.08018100  |
| C  | -3.33627100 | 3.19075100  | 3.25831300  |
| H  | -1.18604600 | 3.45852700  | 3.14408100  |
| H  | -1.70069600 | 1.93388800  | 3.87779500  |
| H  | -3.42645700 | 3.73058400  | 4.20852100  |
| H  | -3.59739700 | 3.87537000  | 2.44387500  |
| H  | -4.06108400 | 2.37022600  | 3.25338400  |
| C  | -1.29809100 | -0.37545600 | -2.62728000 |
| C  | -2.07418800 | -0.98088200 | -1.63161800 |
| C  | -1.92531500 | -0.59774200 | -0.29780200 |
| C  | -0.98941300 | 0.37859300  | 0.09137800  |
| C  | -0.23530000 | 0.98422300  | -0.93215700 |
| C  | -0.38367200 | 0.61870500  | -2.27358300 |
| H  | -1.40227900 | -0.68126700 | -3.66574500 |
| H  | -2.79174800 | -1.75519500 | -1.89091300 |
| H  | -2.52438000 | -1.07689400 | 0.46450700  |
| H  | 0.51927000  | 1.70988700  | -0.66387400 |
| H  | 0.24359400  | 1.08452700  | -3.02918400 |
| C  | -0.49711800 | -0.54742300 | 3.75998000  |
| C  | 1.15461900  | 1.18712600  | 3.14170800  |
| C  | 1.00799700  | -0.21561000 | 3.75239600  |
| H  | -0.97875300 | 0.03458900  | 4.56701100  |
| H  | 2.21992700  | 1.44444500  | 3.05258600  |
| B  | -0.74288600 | 0.75402600  | 1.65313700  |
| O  | -1.14714600 | -0.30996600 | 2.53188300  |
| O  | 0.58621600  | 1.27253700  | 1.85727400  |
| H  | -0.63612700 | -1.60885300 | 4.00955200  |
| H  | 0.70388300  | 1.92853500  | 3.82526900  |
| C  | 1.53658400  | -0.20907800 | 5.19054900  |

|   |            |             |            |
|---|------------|-------------|------------|
| H | 1.02992600 | 0.54657200  | 5.80400100 |
| H | 1.38636300 | -1.18553000 | 5.66711000 |
| H | 2.61189700 | 0.00632900  | 5.21035600 |
| C | 1.77972800 | -1.24114000 | 2.91214500 |
| H | 2.82896400 | -0.93948600 | 2.79975400 |
| H | 1.75501900 | -2.23082600 | 3.38018600 |
| H | 1.34386500 | -1.34033300 | 1.91913100 |

#### TS4d

SCF Energy (a.u.) = -3183.144771

Thermal correction to Gibbs free energy (a.u.) = 1.120241

Charge = 0, Multiplicity = 1

|   |             |            |             |
|---|-------------|------------|-------------|
| C | 1.87943300  | 4.28203500 | -1.16789300 |
| C | 0.63061200  | 4.04577700 | -1.72743300 |
| C | -0.55247900 | 4.32338800 | -1.02414900 |
| C | -0.51523600 | 4.87131900 | 0.28928500  |
| C | 0.78174900  | 5.07555500 | 0.85938500  |
| C | 1.92917500  | 4.80194900 | 0.14823300  |
| H | 0.56131300  | 3.62857600 | -2.72777800 |
| H | -1.50683300 | 4.15648400 | -1.50987200 |
| H | 0.84531700  | 5.47971500 | 1.86651000  |
| H | 2.89653100  | 5.00307200 | 0.60256800  |
| C | -1.70977400 | 4.95237600 | 1.11670200  |
| C | -3.08816300 | 5.20044900 | 0.48540900  |
| H | -1.54928200 | 5.47583000 | 2.06001800  |
| H | -3.66779900 | 5.83808600 | 1.16387000  |
| H | -2.98571400 | 5.76583800 | -0.45061100 |
| C | 4.16574900  | 3.08104600 | -1.30227400 |
| C | 3.16226400  | 4.08105400 | -1.94107600 |
| H | 2.92723700  | 3.77660400 | -2.96600800 |
| H | 3.66532600  | 5.05378100 | -2.01361800 |
| H | 4.05124000  | 3.14959300 | -0.21468000 |
| C | 3.92001600  | 1.62508500 | -1.68280900 |
| C | 3.77315900  | 0.64064300 | -0.70528800 |

|    |            |             |             |
|----|------------|-------------|-------------|
| C  | 3.94018100 | 1.21334000  | -3.02332300 |
| C  | 3.65469000 | -0.71033300 | -1.04370800 |
| H  | 3.74329800 | 0.92558200  | 0.34327000  |
| C  | 3.83340400 | -0.13142100 | -3.35874700 |
| H  | 4.07258400 | 1.94818300  | -3.81259100 |
| C  | 3.69868000 | -1.12563700 | -2.37524700 |
| H  | 3.52391800 | -1.43220700 | -0.25220900 |
| H  | 3.86686700 | -0.42258700 | -4.40669800 |
| C  | 8.33483500 | 3.92583900  | -2.16575800 |
| C  | 7.35409700 | 4.26155000  | -3.09878300 |
| C  | 6.00791000 | 4.01112000  | -2.82572600 |
| C  | 5.61979200 | 3.42197700  | -1.61687800 |
| C  | 6.61439900 | 3.08615900  | -0.69006100 |
| C  | 7.95921800 | 3.33558400  | -0.95714900 |
| H  | 9.38202800 | 4.12271400  | -2.37697400 |
| H  | 7.63440200 | 4.72149500  | -4.04257700 |
| H  | 5.25838200 | 4.28123100  | -3.56373300 |
| H  | 6.32753000 | 2.61673700  | 0.24792100  |
| H  | 8.71365500 | 3.07009500  | -0.22168500 |
| C  | 3.54857800 | -3.72193400 | -1.80763900 |
| C  | 3.63042500 | -2.57079200 | -2.84049600 |
| H  | 2.78361300 | -2.68428000 | -3.53000500 |
| H  | 4.52131300 | -2.75430400 | -3.45389600 |
| C  | 4.74255200 | -3.71017900 | -0.84731000 |
| C  | 6.03066200 | -3.86716400 | -1.37576900 |
| C  | 4.61956200 | -3.53661700 | 0.53537300  |
| C  | 7.16509800 | -3.82924800 | -0.56655000 |
| H  | 6.15877200 | -4.02123100 | -2.44411900 |
| C  | 5.73994000 | -3.49475800 | 1.36702500  |
| H  | 3.63777700 | -3.42693400 | 0.98011200  |
| C  | 6.99992400 | -3.63704200 | 0.80078800  |
| H  | 8.15411000 | -3.94920600 | -0.99377600 |
| H  | 5.62520000 | -3.35168300 | 2.43553200  |
| Br | 8.58124900 | -3.57356600 | 1.95474700  |

|   |              |             |             |
|---|--------------|-------------|-------------|
| C | -0.32702900  | -4.34569100 | 0.05177400  |
| C | -0.13472700  | -3.25169800 | -0.78922900 |
| C | 1.11501200   | -3.02502600 | -1.37232100 |
| C | 2.18790500   | -3.89072300 | -1.13911400 |
| C | 1.97285000   | -4.99973600 | -0.30392800 |
| C | 0.73483900   | -5.22195200 | 0.29483900  |
| H | -1.29268500  | -4.51450300 | 0.51978200  |
| H | -0.94368900  | -2.55531600 | -0.98194100 |
| H | 1.24318000   | -2.14385000 | -1.98724900 |
| H | 2.79067100   | -5.69077200 | -0.11662200 |
| H | 0.59678700   | -6.08303400 | 0.94318800  |
| H | 3.68017200   | -4.62869200 | -2.41734900 |
| C | -8.30069600  | -1.01545000 | -0.03834000 |
| C | -9.36384500  | -0.73761800 | -0.90978200 |
| C | -10.17749100 | -1.75070300 | -1.40216200 |
| C | -9.95729600  | -3.09163800 | -1.04085500 |
| C | -8.89140500  | -3.36510900 | -0.16880700 |
| C | -8.07800500  | -2.34818900 | 0.32349900  |
| H | -9.55385600  | 0.29254800  | -1.20346000 |
| H | -10.99367200 | -1.49796200 | -2.07218000 |
| H | -8.69892900  | -4.39437600 | 0.12438700  |
| H | -7.25079500  | -2.59125900 | 0.98394100  |
| C | -10.78431400 | -4.20370000 | -1.52944600 |
| C | -11.84049800 | -4.13412200 | -2.34947200 |
| H | -10.47973600 | -5.18533800 | -1.16650800 |
| H | -12.37763300 | -5.02980500 | -2.64521600 |
| H | -12.21006100 | -3.19595400 | -2.75419600 |
| C | -6.21539800  | 0.32255300  | -0.56726000 |
| C | -7.38556400  | 0.08869000  | 0.42822100  |
| H | -7.94342500  | 1.02657700  | 0.53243200  |
| H | -6.98025100  | -0.15745900 | 1.41541500  |
| H | -6.67219600  | 0.46310000  | -1.55436000 |
| C | -5.41792600  | 1.58278700  | -0.26679000 |
| C | -4.89517700  | 2.33486400  | -1.32511000 |

|    |             |             |             |
|----|-------------|-------------|-------------|
| C  | -5.16690200 | 2.03012800  | 1.03626800  |
| C  | -4.15371700 | 3.49255200  | -1.09368000 |
| H  | -5.07315700 | 2.00827200  | -2.34684300 |
| C  | -4.41864300 | 3.18250500  | 1.26632000  |
| H  | -5.55909900 | 1.48282600  | 1.88764100  |
| C  | -3.89562100 | 3.93790300  | 0.20772200  |
| H  | -3.77876000 | 4.06383600  | -1.93989700 |
| H  | -4.24044800 | 3.50284300  | 2.28641300  |
| C  | -3.80389900 | -3.27110900 | -0.83892100 |
| C  | -4.58563000 | -2.86075700 | -1.91868100 |
| C  | -5.34754200 | -1.69505300 | -1.82555200 |
| C  | -5.33880700 | -0.91965200 | -0.66113600 |
| C  | -4.55014600 | -1.34093300 | 0.41727800  |
| C  | -3.78917000 | -2.50573500 | 0.32908000  |
| H  | -3.20510000 | -4.17408100 | -0.91096400 |
| H  | -4.60699300 | -3.44840900 | -2.83222600 |
| H  | -5.96926600 | -1.38762600 | -2.66233400 |
| H  | -4.50454000 | -0.74711500 | 1.32532500  |
| H  | -3.17405700 | -2.80591900 | 1.17180500  |
| Ni | -1.27824200 | 2.99278200  | 1.09405600  |
| O  | -1.67979700 | 2.15948800  | 2.89158000  |
| C  | -1.36935400 | 2.88951100  | 4.09826500  |
| C  | -2.55327600 | 3.75170300  | 4.48924500  |
| H  | -0.46896600 | 3.49053800  | 3.93631600  |
| H  | -1.14889600 | 2.15974300  | 4.88475600  |
| H  | -2.33226700 | 4.28739800  | 5.41960100  |
| H  | -2.77128900 | 4.48854900  | 3.71190600  |
| H  | -3.44388400 | 3.13478700  | 4.64634100  |
| C  | -0.67539300 | -0.06526300 | -2.18235200 |
| C  | -1.88934100 | -0.02031900 | -1.49196900 |
| C  | -1.95213600 | 0.62383100  | -0.25477600 |
| C  | -0.82430400 | 1.23530300  | 0.32674600  |
| C  | 0.39218200  | 1.12238800  | -0.36575200 |
| C  | 0.46974300  | 0.49769300  | -1.61292200 |

|   |             |             |             |
|---|-------------|-------------|-------------|
| H | -0.61829500 | -0.54695900 | -3.15619300 |
| H | -2.78245300 | -0.47277500 | -1.91308600 |
| H | -2.90346200 | 0.67346100  | 0.25956900  |
| H | 1.28616600  | 1.58536600  | 0.04324900  |
| H | 1.41225400  | 0.46946300  | -2.14698300 |
| C | -0.83621100 | -1.39534800 | 2.35576400  |
| C | 0.83853000  | -0.14934200 | 3.75311600  |
| C | 0.62040200  | -1.42299800 | 2.92559100  |
| H | -1.41688200 | -2.22959400 | 2.76237500  |
| H | 1.89896800  | -0.03799200 | 4.00139400  |
| B | -0.88450200 | 0.98066400  | 2.62711200  |
| O | -1.57215800 | -0.21354200 | 2.67968300  |
| O | 0.44359400  | 1.02257300  | 3.04132700  |
| H | -0.81742500 | -1.49676500 | 1.26642000  |
| H | 0.27531000  | -0.21245800 | 4.69634800  |
| C | 0.81058900  | -2.65288000 | 3.82521400  |
| H | 0.08827400  | -2.66198700 | 4.65052300  |
| H | 0.67694900  | -3.57257800 | 3.24379200  |
| H | 1.81935100  | -2.67626900 | 4.25609500  |
| C | 1.64463400  | -1.46373000 | 1.78468200  |
| H | 2.66605100  | -1.44898700 | 2.18765700  |
| H | 1.52344200  | -2.37143100 | 1.19024900  |
| H | 1.52423300  | -0.61012000 | 1.11528400  |

### im8d

SCF Energy (a.u.) = -3183.162135

Thermal correction to Gibbs free energy (a.u.) = 1.118357

Charge = 0, Multiplicity = 1

|   |             |            |             |
|---|-------------|------------|-------------|
| C | 2.33302900  | 4.26324100 | -0.87048200 |
| C | 1.05205600  | 4.20125800 | -1.36173500 |
| C | -0.08756700 | 4.45413500 | -0.54077600 |
| C | 0.08892300  | 4.87822000 | 0.82961200  |
| C | 1.44937600  | 4.94099700 | 1.31299200  |
| C | 2.50776600  | 4.65714300 | 0.49527800  |

|   |             |             |             |
|---|-------------|-------------|-------------|
| H | 0.88390100  | 3.91615300  | -2.39584600 |
| H | -1.04625800 | 4.59696000  | -1.03125100 |
| H | 1.61789600  | 5.27201000  | 2.33475700  |
| H | 3.51795000  | 4.75525000  | 0.88704700  |
| C | -1.03034600 | 4.95003000  | 1.68922200  |
| C | -2.42835300 | 5.31334600  | 1.20764800  |
| H | -0.82071300 | 5.14168500  | 2.73876400  |
| H | -2.92532100 | 5.89614200  | 1.99460900  |
| H | -2.36560700 | 5.97801000  | 0.33594500  |
| C | 4.51856100  | 2.91864700  | -1.18130200 |
| C | 3.55045400  | 4.00784000  | -1.73068300 |
| H | 3.23292400  | 3.75244400  | -2.74710400 |
| H | 4.11806400  | 4.94453500  | -1.80630200 |
| H | 4.42327900  | 2.91763800  | -0.08999500 |
| C | 4.21232800  | 1.49655500  | -1.64398600 |
| C | 3.96824600  | 0.47840900  | -0.72143800 |
| C | 4.28065800  | 1.13906400  | -2.99805200 |
| C | 3.82277400  | -0.85398900 | -1.11979100 |
| H | 3.89407900  | 0.72170000  | 0.33573100  |
| C | 4.14137200  | -0.18611600 | -3.39516200 |
| H | 4.47824000  | 1.90013100  | -3.74780000 |
| C | 3.92594600  | -1.21766900 | -2.46449000 |
| H | 3.63994800  | -1.60256200 | -0.36290200 |
| H | 4.21600900  | -0.43354000 | -4.45213500 |
| C | 8.71165900  | 3.64620100  | -2.03874300 |
| C | 7.73755500  | 4.06486400  | -2.94502000 |
| C | 6.38490400  | 3.85222600  | -2.67243800 |
| C | 5.98266500  | 3.21736200  | -1.49133300 |
| C | 6.97077100  | 2.79809800  | -0.59195400 |
| C | 8.32233100  | 3.01051700  | -0.85791200 |
| H | 9.76402600  | 3.81482200  | -2.24892700 |
| H | 8.02838600  | 4.56119000  | -3.86696500 |
| H | 5.64020000  | 4.18849600  | -3.38784500 |
| H | 6.67259900  | 2.29339800  | 0.32405600  |

|    |              |             |             |
|----|--------------|-------------|-------------|
| H  | 9.07143400   | 2.68153400  | -0.14277100 |
| C  | 3.48564200   | -3.84635600 | -2.11499700 |
| C  | 3.89306300   | -2.64124600 | -3.00437900 |
| H  | 3.24153000   | -2.66423100 | -3.88669200 |
| H  | 4.89823600   | -2.85418300 | -3.39194200 |
| C  | 4.25514500   | -3.91388200 | -0.79193600 |
| C  | 5.64957300   | -3.76947300 | -0.79115400 |
| C  | 3.61538800   | -4.11402400 | 0.43532600  |
| C  | 6.38504800   | -3.79560700 | 0.39214500  |
| H  | 6.17905400   | -3.61637700 | -1.72675200 |
| C  | 4.33121500   | -4.14208600 | 1.63423800  |
| H  | 2.54008800   | -4.23345700 | 0.46603400  |
| C  | 5.70888100   | -3.97569700 | 1.59473700  |
| H  | 7.46182200   | -3.67168500 | 0.37599600  |
| H  | 3.81741500   | -4.28796900 | 2.57795600  |
| Br | 6.72451000   | -3.99556600 | 3.26921500  |
| C  | -0.78183100  | -4.49904900 | -1.66960500 |
| C  | -0.30534700  | -3.21149400 | -1.91242000 |
| C  | 1.06734900   | -2.98363500 | -2.05104900 |
| C  | 1.98278900   | -4.03561700 | -1.95713400 |
| C  | 1.48813300   | -5.32753500 | -1.71867400 |
| C  | 0.12230100   | -5.56084000 | -1.57023900 |
| H  | -1.84816300  | -4.67817200 | -1.56066900 |
| H  | -0.98844600  | -2.37279000 | -1.99811200 |
| H  | 1.41014300   | -1.97241100 | -2.22983400 |
| H  | 2.18711100   | -6.15787900 | -1.64591500 |
| H  | -0.23627400  | -6.57014300 | -1.38737700 |
| H  | 3.82356300   | -4.72063900 | -2.69091100 |
| C  | -7.97303100  | -0.57739500 | 0.55610600  |
| C  | -9.21760300  | -0.06341800 | 0.16394100  |
| C  | -10.22181900 | -0.89307300 | -0.31985900 |
| C  | -10.01883700 | -2.27979700 | -0.43291500 |
| C  | -8.77131100  | -2.78993500 | -0.03938900 |
| C  | -7.76718700  | -1.95665600 | 0.44567400  |

|   |              |             |             |
|---|--------------|-------------|-------------|
| H | -9.39809300  | 1.00657700  | 0.24207500  |
| H | -11.17412000 | -0.46013400 | -0.61079100 |
| H | -8.58842000  | -3.85889300 | -0.11902900 |
| H | -6.80617600  | -2.37753400 | 0.72613800  |
| C | -11.04250800 | -3.20530600 | -0.93772700 |
| C | -12.28128400 | -2.90477600 | -1.34750900 |
| H | -10.72937000 | -4.24882000 | -0.97176800 |
| H | -12.95439100 | -3.67808500 | -1.70409200 |
| H | -12.67190000 | -1.89090500 | -1.34473700 |
| C | -6.02289400  | 0.86507500  | -0.18398400 |
| C | -6.87322800  | 0.34886200  | 1.01100600  |
| H | -7.29771800  | 1.21545800  | 1.53102300  |
| H | -6.22190200  | -0.16757500 | 1.72412500  |
| H | -6.73170800  | 1.28338300  | -0.90871100 |
| C | -5.07977600  | 1.99213200  | 0.20641500  |
| C | -4.86868800  | 3.04814100  | -0.68917300 |
| C | -4.38992900  | 2.02237400  | 1.42390800  |
| C | -4.00582000  | 4.09714100  | -0.38091700 |
| H | -5.38308200  | 3.04119300  | -1.64717100 |
| C | -3.52935800  | 3.07521800  | 1.73577100  |
| H | -4.51483600  | 1.22057100  | 2.14428700  |
| C | -3.32473800  | 4.13545400  | 0.84137700  |
| H | -3.86302200  | 4.90320500  | -1.09695000 |
| H | -3.01218300  | 3.07307100  | 2.68883600  |
| C | -4.18722900  | -2.55189100 | -2.12124400 |
| C | -5.15602500  | -1.79957200 | -2.78441100 |
| C | -5.72120900  | -0.68592400 | -2.16053500 |
| C | -5.32294700  | -0.29745900 | -0.87737200 |
| C | -4.33258200  | -1.04691800 | -0.22928800 |
| C | -3.77935400  | -2.17070400 | -0.84165800 |
| H | -3.74512500  | -3.42089900 | -2.60057900 |
| H | -5.48116400  | -2.08255700 | -3.78165300 |
| H | -6.49711300  | -0.11948500 | -2.66880800 |
| H | -3.97764800  | -0.74051900 | 0.74985800  |

|    |             |             |             |
|----|-------------|-------------|-------------|
| H  | -3.01706600 | -2.74514100 | -0.32588800 |
| Ni | -0.71977200 | 2.94403200  | 0.83503000  |
| O  | -0.67073100 | 1.86777700  | 2.80361300  |
| C  | 0.04936800  | 2.55517100  | 3.85282000  |
| C  | -0.91634400 | 3.03445500  | 4.92144500  |
| H  | 0.56508200  | 3.38769600  | 3.37457700  |
| H  | 0.79581400  | 1.87731800  | 4.27068700  |
| H  | -0.37311900 | 3.57352200  | 5.70619300  |
| H  | -1.66543900 | 3.70852000  | 4.49463600  |
| H  | -1.43332100 | 2.18639600  | 5.38333000  |
| C  | -0.60745400 | 0.04136400  | -2.88579400 |
| C  | -1.80718500 | 0.36488300  | -2.24680600 |
| C  | -1.79013300 | 1.12592500  | -1.07349500 |
| C  | -0.58988300 | 1.58655100  | -0.50269100 |
| C  | 0.59922900  | 1.20318400  | -1.13761300 |
| C  | 0.60078900  | 0.45150500  | -2.31588000 |
| H  | -0.61281400 | -0.52743000 | -3.81292400 |
| H  | -2.75712000 | 0.03837200  | -2.66211400 |
| H  | -2.73622200 | 1.37595400  | -0.61035500 |
| H  | 1.55181100  | 1.54365700  | -0.74715800 |
| H  | 1.54420600  | 0.22010500  | -2.80047000 |
| C  | -1.22345100 | -1.47958700 | 1.49543700  |
| C  | 0.18530800  | -1.60950200 | 3.52410200  |
| C  | 0.10453400  | -2.02317100 | 2.04995700  |
| H  | -2.06049000 | -2.09730900 | 1.84598900  |
| H  | 1.12632200  | -1.94447400 | 3.97207300  |
| B  | -0.66929100 | 0.48285100  | 2.78472200  |
| O  | -1.48647900 | -0.12980200 | 1.89348900  |
| O  | 0.14265000  | -0.18618200 | 3.65889000  |
| H  | -1.21803100 | -1.48572500 | 0.40289000  |
| H  | -0.64310400 | -2.05060000 | 4.09599900  |
| C  | 0.10926000  | -3.55331200 | 1.94896600  |
| H  | -0.71326600 | -3.99688400 | 2.52355000  |
| H  | 0.00898800  | -3.87606100 | 0.90842200  |

|   |            |             |            |
|---|------------|-------------|------------|
| H | 1.04861400 | -3.96172700 | 2.34017500 |
| C | 1.29191300 | -1.43411400 | 1.27115600 |
| H | 2.24107300 | -1.74972600 | 1.71934700 |
| H | 1.26870100 | -1.77792500 | 0.23583300 |
| H | 1.27263900 | -0.34187100 | 1.24056500 |

**im9d**

SCF Energy (a.u.) = -2968.740283

Thermal correction to Gibbs free energy (a.u.) = 1.076770

Charge = 0, Multiplicity = 1

|   |             |             |             |
|---|-------------|-------------|-------------|
| C | 1.23510500  | 1.32080800  | -2.44953500 |
| C | 0.78882800  | 0.64802000  | -1.30291900 |
| C | -0.21473800 | -0.30025300 | -1.39057200 |
| C | -0.79522400 | -0.64948700 | -2.62010400 |
| C | -0.38446000 | 0.05791000  | -3.75493900 |
| C | 0.61397400  | 1.03158700  | -3.66771600 |
| H | 1.23485700  | 0.87494400  | -0.34156500 |
| H | -0.55407000 | -0.81364000 | -0.49901600 |
| H | -0.82306800 | -0.18244100 | -4.72075900 |
| H | 0.93151500  | 1.55710700  | -4.56614600 |
| C | -1.71437900 | -1.81118400 | -2.71228200 |
| C | -1.15688000 | -3.16706800 | -2.26057100 |
| H | -2.23589400 | -1.86759800 | -3.66862900 |
| H | -1.74152100 | -3.55193700 | -1.35053900 |
| H | -1.38225300 | -3.93047900 | -3.01320200 |
| C | 1.75178500  | 3.77113800  | -1.99011300 |
| C | 2.31388000  | 2.36535400  | -2.34089100 |
| H | 3.02959800  | 2.06164800  | -1.57158000 |
| H | 2.86332200  | 2.44325100  | -3.28673900 |
| H | 1.01601200  | 4.01665100  | -2.76690200 |
| C | 1.00581700  | 3.73869500  | -0.66322000 |
| C | -0.37163500 | 3.49425900  | -0.62550100 |
| C | 1.68028800  | 3.87613300  | 0.55336800  |
| C | -1.05476600 | 3.40198300  | 0.58535800  |

|    |             |             |             |
|----|-------------|-------------|-------------|
| H  | -0.91770800 | 3.35324900  | -1.55406700 |
| C  | 0.99745400  | 3.77498400  | 1.76389500  |
| H  | 2.74713900  | 4.07462500  | 0.55220400  |
| C  | -0.38386700 | 3.54753500  | 1.80742200  |
| H  | -2.11922200 | 3.20468900  | 0.56899300  |
| H  | 1.54520600  | 3.89115700  | 2.69635500  |
| C  | 4.69507100  | 6.95890000  | -1.97604500 |
| C  | 5.11399000  | 5.63510600  | -1.85615000 |
| C  | 4.18100700  | 4.59439600  | -1.87315200 |
| C  | 2.81376000  | 4.86105200  | -2.00769300 |
| C  | 2.40608200  | 6.19740300  | -2.12627200 |
| C  | 3.33239400  | 7.23714500  | -2.11282500 |
| H  | 5.42081900  | 7.76728100  | -1.96518000 |
| H  | 6.17122700  | 5.40563900  | -1.75115200 |
| H  | 4.52836900  | 3.57159700  | -1.77868300 |
| H  | 1.34544200  | 6.41774300  | -2.22179900 |
| H  | 2.99273500  | 8.26486500  | -2.20950500 |
| C  | -1.79108800 | 2.19864300  | 3.57548700  |
| C  | -1.08482600 | 3.51809900  | 3.14975200  |
| H  | -0.33332900 | 3.72068100  | 3.92026300  |
| H  | -1.80600500 | 4.34167800  | 3.22161100  |
| C  | -3.15805600 | 1.92962000  | 2.94674800  |
| C  | -3.91123500 | 2.91166900  | 2.29398300  |
| C  | -3.74645400 | 0.66779200  | 3.11887900  |
| C  | -5.18277500 | 2.64172400  | 1.78234800  |
| H  | -3.51190200 | 3.90992600  | 2.15773600  |
| C  | -5.02444300 | 0.38451400  | 2.64157800  |
| H  | -3.19532900 | -0.11181700 | 3.63532800  |
| C  | -5.72053000 | 1.37514600  | 1.95825300  |
| H  | -5.73416800 | 3.40701600  | 1.24899400  |
| H  | -5.46267700 | -0.59426800 | 2.79419400  |
| Br | -7.48138700 | 0.96987400  | 1.21865100  |
| C  | 0.99725700  | -1.10930400 | 3.30691700  |
| C  | 0.24805400  | -0.73916400 | 2.18716500  |

|   |             |             |             |
|---|-------------|-------------|-------------|
| C | -0.65540100 | 0.32054600  | 2.26213800  |
| C | -0.83424700 | 1.02093500  | 3.46343800  |
| C | -0.07505700 | 0.64222100  | 4.57598800  |
| C | 0.83831700  | -0.41117100 | 4.50323600  |
| H | 1.70050000  | -1.93547100 | 3.24396600  |
| H | 0.37932000  | -1.27402300 | 1.25301300  |
| H | -1.22799000 | 0.60185200  | 1.38566900  |
| H | -0.20469900 | 1.17791200  | 5.51384700  |
| H | 1.41429100  | -0.68969100 | 5.38129500  |
| H | -1.99116700 | 2.33024900  | 4.64901700  |
| C | 6.31782900  | -3.01159400 | 1.01311500  |
| C | 7.32335300  | -3.71889900 | 0.33859900  |
| C | 8.66808000  | -3.44078200 | 0.55183800  |
| C | 9.06229000  | -2.43647000 | 1.45359300  |
| C | 8.05177100  | -1.73085000 | 2.12626100  |
| C | 6.70547500  | -2.01144900 | 1.91088900  |
| H | 7.04282100  | -4.50056000 | -0.36417100 |
| H | 9.41986200  | -4.01071400 | 0.01437100  |
| H | 8.33037700  | -0.94731100 | 2.82679800  |
| H | 5.94460800  | -1.43667700 | 2.43111500  |
| C | 10.46762900 | -2.09848300 | 1.71874800  |
| C | 11.55620400 | -2.66499800 | 1.18324300  |
| H | 10.60935800 | -1.29083600 | 2.43684400  |
| H | 12.55171600 | -2.32907200 | 1.45582000  |
| H | 11.50291400 | -3.47580500 | 0.46194900  |
| C | 4.35316400  | -2.42787900 | -0.48153800 |
| C | 4.86333300  | -3.27578400 | 0.71659000  |
| H | 4.70803500  | -4.33568800 | 0.48260500  |
| H | 4.26050100  | -3.04721900 | 1.60228500  |
| H | 5.03293100  | -2.62558000 | -1.31935500 |
| C | 2.95072600  | -2.80101000 | -0.93352900 |
| C | 2.60207900  | -2.62645700 | -2.28062800 |
| C | 1.95915000  | -3.24695500 | -0.05515500 |
| C | 1.30012900  | -2.82437600 | -2.72061200 |

|    |             |             |             |
|----|-------------|-------------|-------------|
| H  | 3.35955600  | -2.28971200 | -2.98389300 |
| C  | 0.64537600  | -3.43123500 | -0.49460200 |
| H  | 2.19376200  | -3.42911400 | 0.98912900  |
| C  | 0.28867900  | -3.18662700 | -1.82086200 |
| H  | 1.04732900  | -2.62553900 | -3.75740600 |
| H  | -0.12012700 | -3.72390800 | 0.22009100  |
| C  | 4.74888600  | 1.75744000  | 0.58191800  |
| C  | 5.62865700  | 1.17913100  | -0.33409700 |
| C  | 5.48166400  | -0.16117400 | -0.69958900 |
| C  | 4.45769500  | -0.94167900 | -0.15594200 |
| C  | 3.57561600  | -0.34726800 | 0.75413600  |
| C  | 3.71590000  | 0.98832100  | 1.12498000  |
| H  | 4.86250800  | 2.80035500  | 0.86286100  |
| H  | 6.43613800  | 1.76802400  | -0.76096500 |
| H  | 6.18315500  | -0.61184200 | -1.39660800 |
| H  | 2.76301700  | -0.92843400 | 1.17221400  |
| H  | 3.00720800  | 1.42791500  | 1.82020300  |
| Ni | -2.82229500 | -2.16665900 | -1.21730900 |
| C  | -5.18265800 | 1.81661700  | -2.21362100 |
| C  | -4.08755900 | 1.84774600  | -1.34862800 |
| C  | -3.37558700 | 0.68008500  | -1.06577300 |
| C  | -3.73256000 | -0.55370500 | -1.63396300 |
| C  | -4.82413200 | -0.55989400 | -2.51822500 |
| C  | -5.54722400 | 0.60424400  | -2.79965200 |
| H  | -5.73863300 | 2.72422500  | -2.43309900 |
| H  | -3.78467500 | 2.78690600  | -0.89253900 |
| H  | -2.51659800 | 0.74573000  | -0.40399600 |
| H  | -5.12215400 | -1.48852600 | -2.99886300 |
| H  | -6.39190700 | 0.56228700  | -3.48418300 |
| C  | -5.31757700 | -4.02575600 | -1.61700700 |
| C  | -4.20000400 | -4.75238100 | -1.74348000 |
| C  | -3.39589800 | -5.41404200 | -0.64839600 |
| C  | -3.30119800 | -4.67378900 | 0.71007200  |
| C  | -3.09764300 | -3.16168500 | 0.69418600  |

|   |             |             |             |
|---|-------------|-------------|-------------|
| C | -4.07592800 | -2.20444900 | 0.58061000  |
| C | -5.55234200 | -2.38017700 | 0.32722300  |
| C | -6.02651000 | -3.69547900 | -0.33070300 |
| H | -5.75448000 | -3.61004100 | -2.52268900 |
| H | -3.81631500 | -4.90792300 | -2.75134000 |
| H | -2.37936600 | -5.57095900 | -1.02826700 |
| H | -3.78711900 | -6.42446200 | -0.45683000 |
| H | -4.18822000 | -4.89849800 | 1.30907600  |
| H | -2.46051500 | -5.11472000 | 1.25854600  |
| H | -2.15181200 | -2.81811100 | 1.11644200  |
| H | -3.81703600 | -1.20229600 | 0.90683500  |
| H | -5.88072700 | -1.53249100 | -0.28204200 |
| H | -6.07650000 | -2.27237100 | 1.28886000  |
| H | -5.93670600 | -4.52504800 | 0.37528300  |
| H | -7.09863800 | -3.58715600 | -0.53296700 |

#### TS5d

SCF Energy (a.u.) = -2968.722566

Thermal correction to Gibbs free energy (a.u.) = 1.077622

Charge = 0, Multiplicity = 1

|   |             |             |            |
|---|-------------|-------------|------------|
| C | -1.11825200 | 1.10241400  | 2.34623600 |
| C | -0.62108200 | 0.52986800  | 1.16689200 |
| C | 0.37698700  | -0.43300400 | 1.21300600 |
| C | 0.89786100  | -0.87845000 | 2.43434000 |
| C | 0.44631600  | -0.26714900 | 3.60637000 |
| C | -0.54799600 | 0.71184300  | 3.56116400 |
| H | -1.03879300 | 0.83448100  | 0.21377500 |
| H | 0.74550000  | -0.89071600 | 0.30169000 |
| H | 0.84384300  | -0.58992200 | 4.56610900 |
| H | -0.90598700 | 1.15765600  | 4.48669300 |
| C | 1.79928600  | -2.07269900 | 2.49818100 |
| C | 1.03182100  | -3.43742600 | 2.12953200 |
| H | 2.14520400  | -2.21044400 | 3.51992000 |
| H | 1.52801000  | -4.05469500 | 1.31914900 |

|   |             |             |             |
|---|-------------|-------------|-------------|
| H | 1.12331100  | -4.07658800 | 3.01235800  |
| C | -1.67275100 | 3.57619300  | 2.09902000  |
| C | -2.21502100 | 2.13417400  | 2.29388000  |
| H | -2.89889300 | 1.89061300  | 1.47487000  |
| H | -2.79755900 | 2.10783200  | 3.22238600  |
| H | -0.94169300 | 3.75247200  | 2.89850800  |
| C | -0.93382800 | 3.69097000  | 0.77409900  |
| C | 0.46269300  | 3.65274900  | 0.71386800  |
| C | -1.64264300 | 3.76694600  | -0.42778500 |
| C | 1.13339000  | 3.68489100  | -0.50904900 |
| H | 1.03442700  | 3.58563700  | 1.63584200  |
| C | -0.97589600 | 3.76959000  | -1.64941000 |
| H | -2.72510900 | 3.81639500  | -0.40346800 |
| C | 0.42195000  | 3.72871600  | -1.71647700 |
| H | 2.21761800  | 3.66171600  | -0.51927500 |
| H | -1.54961200 | 3.81180300  | -2.57242600 |
| C | -4.66857400 | 6.70049900  | 2.38947100  |
| C | -5.06230800 | 5.39237300  | 2.11323300  |
| C | -4.11215100 | 4.37087400  | 2.03131500  |
| C | -2.75265800 | 4.64237100  | 2.22136700  |
| C | -2.36947800 | 5.96237900  | 2.49708100  |
| C | -3.31359500 | 6.98261500  | 2.58272600  |
| H | -5.40790200 | 7.49377700  | 2.45552300  |
| H | -6.11338300 | 5.16013000  | 1.96215300  |
| H | -4.43996900 | 3.36061200  | 1.81352200  |
| H | -1.31464600 | 6.18710000  | 2.63691700  |
| H | -2.99369900 | 7.99801600  | 2.80064800  |
| C | 1.96738500  | 2.50817300  | -3.44243000 |
| C | 1.10062800  | 3.74975900  | -3.06739200 |
| H | 0.32896800  | 3.83634400  | -3.83995000 |
| H | 1.71823700  | 4.65046100  | -3.16154400 |
| C | 3.28463400  | 2.41226900  | -2.66877400 |
| C | 4.05960000  | 3.56112100  | -2.44489100 |
| C | 3.80760000  | 1.18581300  | -2.24572300 |

|    |              |             |             |
|----|--------------|-------------|-------------|
| C  | 5.29401500   | 3.50002200  | -1.80015500 |
| H  | 3.70508600   | 4.53233900  | -2.77395400 |
| C  | 5.04069900   | 1.09844100  | -1.59504600 |
| H  | 3.25117800   | 0.27442000  | -2.42580800 |
| C  | 5.76602900   | 2.26146200  | -1.37954300 |
| H  | 5.87423300   | 4.40053200  | -1.63346800 |
| H  | 5.41710500   | 0.14142600  | -1.25977600 |
| Br | 7.49633700   | 2.15832200  | -0.46973000 |
| C  | -0.51149200  | -1.05228200 | -3.52988500 |
| C  | -0.12228300  | -0.50950800 | -2.30333300 |
| C  | 0.68351400   | 0.62939600  | -2.25715100 |
| C  | 1.12422200   | 1.24220900  | -3.44108400 |
| C  | 0.72848100   | 0.68329800  | -4.66211900 |
| C  | -0.08382200  | -0.45097800 | -4.71291700 |
| H  | -1.13990300  | -1.93841600 | -3.55924600 |
| H  | -0.45078300  | -0.97798800 | -1.38212500 |
| H  | 0.97355100   | 1.03990300  | -1.29697200 |
| H  | 1.06264100   | 1.14457100  | -5.58867700 |
| H  | -0.37505400  | -0.86416800 | -5.67454400 |
| H  | 2.25657800   | 2.68161400  | -4.48898300 |
| C  | -6.48189700  | -2.72663700 | -0.94580600 |
| C  | -7.50776900  | -3.29002000 | -0.17328800 |
| C  | -8.83516000  | -2.92329200 | -0.35909800 |
| C  | -9.19090200  | -1.97149500 | -1.33123100 |
| C  | -8.16037300  | -1.41090000 | -2.10268000 |
| C  | -6.83147700  | -1.77986500 | -1.91408600 |
| H  | -7.25711100  | -4.02857200 | 0.58519700  |
| H  | -9.60384200  | -3.38255100 | 0.25497300  |
| H  | -8.40890700  | -0.67078900 | -2.85949500 |
| H  | -6.05250100  | -1.31496800 | -2.51174800 |
| C  | -10.57635100 | -1.54426100 | -1.57098300 |
| C  | -11.67955800 | -1.96870100 | -0.94210000 |
| H  | -10.68797600 | -0.79547500 | -2.35514000 |
| H  | -12.65742600 | -1.57801800 | -1.20538900 |

|    |              |             |             |
|----|--------------|-------------|-------------|
| H  | -11.65610800 | -2.71290500 | -0.15081900 |
| C  | -4.42533800  | -2.19240400 | 0.44380100  |
| C  | -5.04018800  | -3.07712800 | -0.67922500 |
| H  | -4.95070200  | -4.12723700 | -0.37722300 |
| H  | -4.45524700  | -2.95230100 | -1.59668000 |
| H  | -5.08274300  | -2.29348200 | 1.31577100  |
| C  | -3.03910300  | -2.64565300 | 0.86593800  |
| C  | -2.66669400  | -2.54839800 | 2.21346100  |
| C  | -2.08747500  | -3.12347400 | -0.04130600 |
| C  | -1.38128900  | -2.87043400 | 2.63242800  |
| H  | -3.39329200  | -2.19252500 | 2.93966000  |
| C  | -0.79017200  | -3.42422500 | 0.37481600  |
| H  | -2.34551900  | -3.25226600 | -1.08824200 |
| C  | -0.40735100  | -3.27308100 | 1.70994200  |
| H  | -1.11412600  | -2.75433100 | 3.67839700  |
| H  | -0.05338500  | -3.74636300 | -0.35414300 |
| C  | -4.66669300  | 1.92061700  | -0.89992400 |
| C  | -5.55947500  | 1.43785600  | 0.05734800  |
| C  | -5.45021400  | 0.12417400  | 0.51807500  |
| C  | -4.45565000  | -0.72708800 | 0.02692900  |
| C  | -3.55687800  | -0.22637700 | -0.92319200 |
| C  | -3.65728100  | 1.08454500  | -1.38490100 |
| H  | -4.75580100  | 2.94084800  | -1.26169500 |
| H  | -6.34930800  | 2.07927400  | 0.43891200  |
| H  | -6.16360900  | -0.25479900 | 1.24480600  |
| H  | -2.76882200  | -0.86354100 | -1.30769100 |
| H  | -2.93844200  | 1.45098500  | -2.11126800 |
| Ni | 2.59687400   | -2.76395500 | 0.79961600  |
| C  | 5.90876000   | -0.06883700 | 2.47158700  |
| C  | 4.85575400   | 0.53134500  | 1.77625600  |
| C  | 3.67375400   | -0.16746900 | 1.53842100  |
| C  | 3.52571700   | -1.49861400 | 1.96633100  |
| C  | 4.56785100   | -2.06798300 | 2.72322500  |
| C  | 5.75388500   | -1.37155700 | 2.95247000  |

|   |            |             |             |
|---|------------|-------------|-------------|
| H | 6.82944100 | 0.47945200  | 2.64691300  |
| H | 4.96030800 | 1.54590400  | 1.40444800  |
| H | 2.87205100 | 0.31624200  | 0.99109800  |
| H | 4.45291400 | -3.07400300 | 3.11730700  |
| H | 6.55540400 | -1.84482200 | 3.51461700  |
| C | 5.11205200 | -4.62479600 | 0.62450600  |
| C | 4.00833200 | -5.37711800 | 0.72719400  |
| C | 3.01777200 | -5.75632700 | -0.34867400 |
| C | 2.80255400 | -4.75953200 | -1.50900100 |
| C | 2.59480500 | -3.29540100 | -1.12633300 |
| C | 3.58540900 | -2.33330100 | -0.85753400 |
| C | 5.09064900 | -2.51087600 | -0.82225300 |
| C | 5.63690500 | -3.94142100 | -0.60923900 |
| H | 5.68520600 | -4.45132500 | 1.53277600  |
| H | 3.78691000 | -5.79680800 | 1.70931100  |
| H | 2.04807500 | -5.91869400 | 0.14137700  |
| H | 3.29160700 | -6.73557100 | -0.77219200 |
| H | 3.62172900 | -4.84605700 | -2.23006500 |
| H | 1.90873600 | -5.09455200 | -2.05011600 |
| H | 1.65735200 | -2.87777500 | -1.49913100 |
| H | 3.29589900 | -1.29911100 | -1.03873200 |
| H | 5.49365700 | -1.85953900 | -0.03746200 |
| H | 5.50869800 | -2.13960300 | -1.77189200 |
| H | 5.44062200 | -4.54751000 | -1.49633600 |
| H | 6.72834000 | -3.86543300 | -0.53159500 |

**im10d**

SCF Energy (a.u.) = -2968.767920

Thermal correction to Gibbs free energy (a.u.) = 1.081280

Charge = 0, Multiplicity = 1

|   |             |             |             |
|---|-------------|-------------|-------------|
| C | 1.44868100  | 1.39424300  | -2.42078700 |
| C | 0.73294400  | 0.80219100  | -1.36989500 |
| C | -0.33640400 | -0.04465100 | -1.62683200 |
| C | -0.71621700 | -0.34749500 | -2.94112800 |

|   |             |             |             |
|---|-------------|-------------|-------------|
| C | -0.03698700 | 0.27989400  | -3.98567300 |
| C | 1.03113600  | 1.14206100  | -3.72932200 |
| H | 1.03034900  | 1.00496200  | -0.34771500 |
| H | -0.87474700 | -0.51238900 | -0.80959500 |
| H | -0.31979300 | 0.06260200  | -5.01350000 |
| H | 1.56135900  | 1.60549100  | -4.55856000 |
| C | -1.73141800 | -1.43388800 | -3.22216800 |
| C | -1.14792700 | -2.87864300 | -2.88780700 |
| H | -1.91017100 | -1.42315900 | -4.30608200 |
| H | -1.80992000 | -3.36480500 | -2.15620800 |
| H | -1.19427300 | -3.48706300 | -3.79847500 |
| C | 2.15793200  | 3.78128200  | -1.90427800 |
| C | 2.60785000  | 2.31365600  | -2.13791300 |
| H | 3.14917600  | 1.95599900  | -1.25747700 |
| H | 3.30914800  | 2.29816200  | -2.98045200 |
| H | 1.56259000  | 4.07280500  | -2.77946100 |
| C | 1.24780600  | 3.87381800  | -0.68847800 |
| C | -0.14315200 | 3.89780300  | -0.82751800 |
| C | 1.77969700  | 3.86836600  | 0.60461900  |
| C | -0.98045000 | 3.92084700  | 0.28811500  |
| H | -0.57821100 | 3.88592700  | -1.82340200 |
| C | 0.94440100  | 3.87750600  | 1.71770000  |
| H | 2.85629200  | 3.86055500  | 0.73668600  |
| C | -0.44982700 | 3.91120500  | 1.58457000  |
| H | -2.05485500 | 3.93628900  | 0.13993800  |
| H | 1.38027200  | 3.86602700  | 2.71387700  |
| C | 5.39192000  | 6.65204800  | -1.55183300 |
| C | 5.65929100  | 5.29258100  | -1.40253600 |
| C | 4.63234100  | 4.35241400  | -1.52626400 |
| C | 3.32143900  | 4.75782300  | -1.79794400 |
| C | 3.06507200  | 6.12868400  | -1.94413300 |
| C | 4.08590700  | 7.06816100  | -1.82526000 |
| H | 6.19087400  | 7.38221500  | -1.45781700 |
| H | 6.67092200  | 4.95615600  | -1.19046500 |

|    |             |             |             |
|----|-------------|-------------|-------------|
| H  | 4.86155400  | 3.30031500  | -1.40347600 |
| H  | 2.04760500  | 6.45632900  | -2.14443100 |
| H  | 3.86433800  | 8.12521600  | -1.94550300 |
| C  | -2.12005300 | 2.65686400  | 3.15967100  |
| C  | -1.30901900 | 3.94588600  | 2.82903300  |
| H  | -0.64917100 | 4.11618500  | 3.68619600  |
| H  | -1.98983300 | 4.80436400  | 2.80673100  |
| C  | -3.42682900 | 2.46631000  | 2.38972600  |
| C  | -4.09212300 | 3.51745300  | 1.74761600  |
| C  | -4.07109300 | 1.22054600  | 2.43407800  |
| C  | -5.35224200 | 3.34419000  | 1.16892100  |
| H  | -3.64345900 | 4.50245000  | 1.69452800  |
| C  | -5.33064600 | 1.02428700  | 1.86985500  |
| H  | -3.58119600 | 0.38307800  | 2.91954200  |
| C  | -5.95724000 | 2.09748400  | 1.24738300  |
| H  | -5.84924700 | 4.17242200  | 0.67668000  |
| H  | -5.80811000 | 0.05299000  | 1.91583000  |
| Br | -7.73422300 | 1.84777700  | 0.46460000  |
| C  | 0.60807400  | -0.70897000 | 3.13859600  |
| C  | -0.00665300 | -0.30570500 | 1.95111600  |
| C  | -0.90270600 | 0.76314300  | 1.94624400  |
| C  | -1.20297000 | 1.44387100  | 3.13409100  |
| C  | -0.58055000 | 1.03045500  | 4.31722100  |
| C  | 0.32099100  | -0.03517300 | 4.32510300  |
| H  | 1.30592200  | -1.54170500 | 3.13628000  |
| H  | 0.21938100  | -0.82481100 | 1.02603000  |
| H  | -1.37003800 | 1.06955100  | 1.01645000  |
| H  | -0.80583900 | 1.55138800  | 5.24526000  |
| H  | 0.78974800  | -0.34082600 | 5.25628300  |
| H  | -2.42987500 | 2.78737900  | 4.20697500  |
| C  | 6.04803700  | -3.12289300 | 0.93012600  |
| C  | 7.08769100  | -3.73831900 | 0.21802600  |
| C  | 8.41846700  | -3.52786400 | 0.55815100  |
| C  | 8.76411300  | -2.68713700 | 1.63111200  |

|   |             |             |             |
|---|-------------|-------------|-------------|
| C | 7.71978800  | -2.07412400 | 2.34174300  |
| C | 6.38762100  | -2.28648800 | 1.99843900  |
| H | 6.84494300  | -4.39282700 | -0.61639100 |
| H | 9.19735600  | -4.02334300 | -0.01345700 |
| H | 7.96068800  | -1.41723900 | 3.17408900  |
| H | 5.60074600  | -1.78270000 | 2.55272300  |
| C | 10.15273600 | -2.42616700 | 2.03485800  |
| C | 11.26787300 | -2.92059200 | 1.48278900  |
| H | 10.25603800 | -1.74878300 | 2.88253700  |
| H | 12.24702300 | -2.65427400 | 1.86819400  |
| H | 11.25311700 | -3.60211000 | 0.63672700  |
| C | 4.20768700  | -2.28155000 | -0.60661500 |
| C | 4.61449500  | -3.29918800 | 0.49937800  |
| H | 4.45309000  | -4.31122700 | 0.11010700  |
| H | 3.95208300  | -3.17440300 | 1.36265600  |
| H | 4.93615000  | -2.39538800 | -1.41851400 |
| C | 2.83287900  | -2.56315000 | -1.18809200 |
| C | 2.61688500  | -2.37503900 | -2.55987200 |
| C | 1.74653400  | -2.97576700 | -0.40899200 |
| C | 1.35838500  | -2.54975100 | -3.12443200 |
| H | 3.44877600  | -2.06918300 | -3.18966200 |
| C | 0.47782900  | -3.12293400 | -0.97173900 |
| H | 1.87483100  | -3.17142700 | 0.65170300  |
| C | 0.25437000  | -2.88490300 | -2.33012800 |
| H | 1.22095500  | -2.37227800 | -4.18698500 |
| H | -0.36196600 | -3.38756100 | -0.33985900 |
| C | 4.72313100  | 1.67717100  | 1.08358200  |
| C | 5.66695300  | 1.16186400  | 0.19380200  |
| C | 5.47585100  | -0.09557500 | -0.38266500 |
| C | 4.34499900  | -0.85927200 | -0.07633800 |
| C | 3.40036000  | -0.32519100 | 0.80731900  |
| C | 3.58202800  | 0.92956300  | 1.38604400  |
| H | 4.87347200  | 2.65583700  | 1.53020000  |
| H | 6.55883300  | 1.73445800  | -0.04635000 |

|    |             |             |             |
|----|-------------|-------------|-------------|
| H  | 6.22698000  | -0.50176900 | -1.05466500 |
| H  | 2.50903600  | -0.89231900 | 1.04243600  |
| H  | 2.82531100  | 1.32052500  | 2.05928900  |
| Ni | -3.44148100 | -2.74154800 | -0.75596800 |
| C  | -5.72544800 | -0.68709600 | -1.65028800 |
| C  | -4.76792900 | 0.33999600  | -1.66335000 |
| C  | -3.47928700 | 0.08771600  | -2.11438500 |
| C  | -3.09287600 | -1.19363900 | -2.56852400 |
| C  | -4.08948900 | -2.22058600 | -2.63533100 |
| C  | -5.39904700 | -1.94402100 | -2.15045000 |
| H  | -6.72635000 | -0.49033500 | -1.27953300 |
| H  | -5.02959100 | 1.32889400  | -1.30261000 |
| H  | -2.74701500 | 0.88702800  | -2.11679000 |
| H  | -3.92757600 | -3.10615300 | -3.24838300 |
| H  | -6.15920700 | -2.71717900 | -2.21704000 |
| C  | -4.80797900 | -4.77597800 | -0.08406600 |
| C  | -3.56816300 | -5.21390100 | -0.40898400 |
| C  | -2.37808700 | -5.34539000 | 0.51595300  |
| C  | -2.20937200 | -4.21342600 | 1.56716000  |
| C  | -2.53974200 | -2.81344100 | 1.06361900  |
| C  | -3.80420500 | -2.20535100 | 1.10392300  |
| C  | -5.09960100 | -2.83355100 | 1.57975100  |
| C  | -5.26312800 | -4.35264900 | 1.29249400  |
| H  | -5.56237600 | -4.76524000 | -0.86848400 |
| H  | -3.41068500 | -5.56214200 | -1.42958800 |
| H  | -1.47975800 | -5.37422300 | -0.11154700 |
| H  | -2.40756300 | -6.31541400 | 1.03618300  |
| H  | -2.80292800 | -4.44314500 | 2.45804800  |
| H  | -1.16504600 | -4.23008700 | 1.90346600  |
| H  | -1.69364300 | -2.13181900 | 1.02081700  |
| H  | -3.82625800 | -1.11693700 | 1.06701100  |
| H  | -5.92273200 | -2.29614000 | 1.09221000  |
| H  | -5.23039500 | -2.67813800 | 2.66378700  |
| H  | -4.72698500 | -4.92962000 | 2.04984700  |

H            -6.32288900   -4.60783300   1.41184100

### P3

SCF Energy (a.u.) = -2485.673045

Thermal correction to Gibbs free energy (a.u.) = 0.906279

Charge = 0, Multiplicity = 1

|   |             |             |             |
|---|-------------|-------------|-------------|
| C | 0.27628500  | 0.78830800  | -2.36037000 |
| C | -0.16231100 | 0.17062500  | -1.18091600 |
| C | -0.90777200 | -1.00112200 | -1.22222100 |
| C | -1.20344100 | -1.62434700 | -2.44101400 |
| C | -0.79979700 | -0.98984500 | -3.61719200 |
| C | -0.07848000 | 0.20454600  | -3.57890600 |
| H | 0.10828300  | 0.60686000  | -0.22672200 |
| H | -1.21744900 | -1.46856900 | -0.29374900 |
| H | -1.02189000 | -1.45369900 | -4.57572800 |
| H | 0.24432400  | 0.66864200  | -4.50818900 |
| C | -1.84969800 | -2.99589000 | -2.49676700 |
| C | -1.25282300 | -3.98335900 | -1.43563500 |
| H | -1.61155100 | -3.41007500 | -3.48519100 |
| H | -1.80751300 | -3.87053700 | -0.49765900 |
| H | -1.45323000 | -5.00595700 | -1.77935500 |
| C | 0.28451400  | 3.33122000  | -2.06745000 |
| C | 1.11223000  | 2.04116500  | -2.30586800 |
| H | 1.85433100  | 1.93896400  | -1.50851800 |
| H | 1.66470900  | 2.15566900  | -3.24567300 |
| H | -0.47158600 | 3.37883700  | -2.86203600 |
| C | -0.45806800 | 3.26560200  | -0.74087600 |
| C | -1.83368400 | 3.02150600  | -0.69025100 |
| C | 0.23479300  | 3.39225200  | 0.46810100  |
| C | -2.50115800 | 2.90122400  | 0.52962200  |
| H | -2.38897500 | 2.91272300  | -1.61828900 |
| C | -0.42544600 | 3.25000400  | 1.68501300  |
| H | 1.29993300  | 3.60058900  | 0.45189800  |
| C | -1.80334600 | 3.00172200  | 1.73977200  |

|    |             |             |             |
|----|-------------|-------------|-------------|
| H  | -3.57082800 | 2.71530600  | 0.53842600  |
| H  | 0.13475200  | 3.33391900  | 2.61309200  |
| C  | 2.57250900  | 7.01611200  | -2.25298300 |
| C  | 3.24049200  | 5.79682200  | -2.16137100 |
| C  | 2.52134900  | 4.59876400  | -2.11402400 |
| C  | 1.12291900  | 4.60186700  | -2.15403200 |
| C  | 0.46305300  | 5.83609400  | -2.24462600 |
| C  | 1.17549000  | 7.03106800  | -2.29611400 |
| H  | 3.13167800  | 7.94671400  | -2.29161200 |
| H  | 4.32659100  | 5.77142300  | -2.12887100 |
| H  | 3.06213100  | 3.66178900  | -2.04465300 |
| H  | -0.62407500 | 5.85225700  | -2.26378900 |
| H  | 0.64235400  | 7.97515600  | -2.36889700 |
| C  | -2.95446000 | 1.39296400  | 3.44624500  |
| C  | -2.48853300 | 2.84034400  | 3.07560400  |
| H  | -1.80082900 | 3.16166100  | 3.86536400  |
| H  | -3.35522400 | 3.50823800  | 3.13226300  |
| C  | -4.17719200 | 0.92769300  | 2.65011700  |
| C  | -5.31561000 | 1.74898000  | 2.61139700  |
| C  | -4.25762200 | -0.32058300 | 2.02340900  |
| C  | -6.48448500 | 1.35612400  | 1.96343600  |
| H  | -5.30379800 | 2.71527000  | 3.10692900  |
| C  | -5.41978100 | -0.73970000 | 1.36870700  |
| H  | -3.41055800 | -0.99483500 | 2.04875400  |
| C  | -6.51729700 | 0.10885900  | 1.34800200  |
| H  | -7.35290200 | 2.00490600  | 1.94821500  |
| H  | -5.45493700 | -1.70743600 | 0.88353800  |
| Br | -8.16671500 | -0.46359100 | 0.45724600  |
| C  | 0.43079000  | -1.31181600 | 3.51417800  |
| C  | -0.07101200 | -0.85439900 | 2.29403600  |
| C  | -1.16056400 | 0.01440400  | 2.26423500  |
| C  | -1.78229900 | 0.43013600  | 3.45104200  |
| C  | -1.26887600 | -0.03732600 | 4.66604600  |
| C  | -0.16921600 | -0.89730100 | 4.70310000  |

|   |             |             |             |
|---|-------------|-------------|-------------|
| H | 1.28051700  | -1.98918700 | 3.53618700  |
| H | 0.38232500  | -1.17750400 | 1.36428600  |
| H | -1.53763700 | 0.36628300  | 1.31201400  |
| H | -1.73754300 | 0.27551600  | 5.59632500  |
| H | 0.21043000  | -1.24691300 | 5.65913800  |
| H | -3.29737200 | 1.47273500  | 4.48727900  |
| C | 6.35072600  | -2.33237900 | 1.06808200  |
| C | 7.40834800  | -2.93593200 | 0.37252200  |
| C | 8.69505600  | -2.41344900 | 0.42059500  |
| C | 8.97622400  | -1.25774600 | 1.17059200  |
| C | 7.91411900  | -0.65694500 | 1.86519300  |
| C | 6.62600300  | -1.18248000 | 1.81544000  |
| H | 7.21528800  | -3.83129400 | -0.21451600 |
| H | 9.49025800  | -2.90930800 | -0.12774500 |
| H | 8.10502400  | 0.23894500  | 2.45110200  |
| H | 5.82029600  | -0.68671800 | 2.34918500  |
| C | 10.31596700 | -0.66029500 | 1.25786800  |
| C | 11.44068300 | -1.09476000 | 0.67565100  |
| H | 10.36988800 | 0.23791900  | 1.87298400  |
| H | 12.37949900 | -0.56723600 | 0.81180800  |
| H | 11.47385200 | -1.98159200 | 0.04880800  |
| C | 4.20229300  | -2.26333100 | -0.27606500 |
| C | 4.94731300  | -2.87015900 | 0.94519600  |
| H | 4.96461400  | -3.96034800 | 0.83124800  |
| H | 4.38546900  | -2.64980500 | 1.85928300  |
| H | 4.84056700  | -2.43587000 | -1.15096400 |
| C | 2.85911200  | -2.91781000 | -0.55262000 |
| C | 2.42788700  | -3.06796200 | -1.87698400 |
| C | 1.97830200  | -3.29941400 | 0.46450200  |
| C | 1.14029400  | -3.50215900 | -2.17305400 |
| H | 3.10063600  | -2.79765400 | -2.68730000 |
| C | 0.67685400  | -3.70598600 | 0.16687700  |
| H | 2.28553200  | -3.24356700 | 1.50459700  |
| C | 0.21953500  | -3.77228700 | -1.15204900 |

|   |             |             |             |
|---|-------------|-------------|-------------|
| H | 0.82779700  | -3.55828000 | -3.21127200 |
| H | -0.01068100 | -3.92190400 | 0.98129400  |
| C | 3.88463700  | 2.03172100  | 0.27258000  |
| C | 4.74810800  | 1.50632900  | -0.68960600 |
| C | 4.83067500  | 0.12493600  | -0.88121000 |
| C | 4.05751500  | -0.75241900 | -0.11581700 |
| C | 3.19013000  | -0.21199800 | 0.84195500  |
| C | 3.09923800  | 1.16428000  | 1.03712900  |
| H | 3.81995000  | 3.10609000  | 0.41968900  |
| H | 5.36535100  | 2.17051200  | -1.28869600 |
| H | 5.51861900  | -0.27763100 | -1.61991400 |
| H | 2.57637100  | -0.87082700 | 1.44394500  |
| H | 2.40713900  | 1.55387000  | 1.77779500  |
| C | -6.18107200 | -3.00493100 | -2.17716500 |
| C | -5.46612100 | -1.84189200 | -1.89443200 |
| C | -4.07295200 | -1.82720400 | -1.99099100 |
| C | -3.37127200 | -2.97110100 | -2.38622000 |
| C | -4.10192200 | -4.13165900 | -2.68129700 |
| C | -5.49141600 | -4.15350000 | -2.57338100 |
| H | -7.26410100 | -3.01305600 | -2.09457400 |
| H | -5.99311200 | -0.94157100 | -1.59651100 |
| H | -3.53035400 | -0.91518300 | -1.76744800 |
| H | -3.57529800 | -5.02714500 | -3.00365800 |
| H | -6.03632300 | -5.06451800 | -2.80594900 |

**im1f**

SCF Energy (a.u.) = -1887.167088

Thermal correction to Gibbs free energy (a.u.) = 0.662331

Charge = 0, Multiplicity = 1

|   |              |            |             |
|---|--------------|------------|-------------|
| C | -7.37713400  | 1.00259500 | -0.90887000 |
| C | -8.20937800  | 0.57072500 | -1.95196000 |
| C | -9.58227700  | 0.44878200 | -1.77605600 |
| C | -10.18114100 | 0.75622100 | -0.54124500 |
| C | -9.34408300  | 1.18864100 | 0.49960300  |

|   |              |             |             |
|---|--------------|-------------|-------------|
| C | -7.96866600  | 1.30885300  | 0.32062100  |
| H | -7.76915900  | 0.32745800  | -2.91664800 |
| H | -10.19639900 | 0.11414300  | -2.60656800 |
| H | -9.78218300  | 1.43002300  | 1.46505800  |
| H | -7.34234700  | 1.62796500  | 1.14889500  |
| C | -11.62610100 | 0.64610900  | -0.29752500 |
| C | -12.57134600 | 0.26428300  | -1.16554700 |
| H | -11.93431400 | 0.91168800  | 0.71367300  |
| H | -13.61496400 | 0.21961800  | -0.87049500 |
| H | -12.34933100 | -0.01487900 | -2.19185100 |
| C | -5.21071600  | -0.31906000 | -0.83716000 |
| C | -5.88225400  | 1.05925000  | -1.09372500 |
| H | -5.63725000  | 1.37828700  | -2.11389100 |
| H | -5.45537400  | 1.80000600  | -0.40916000 |
| H | -5.73276700  | -1.04521200 | -1.47276700 |
| C | -3.73916400  | -0.35527400 | -1.21178400 |
| C | -3.15405000  | -1.58294900 | -1.55065700 |
| C | -2.91457500  | 0.77260900  | -1.16116800 |
| C | -1.78806600  | -1.68517700 | -1.79488000 |
| H | -3.77958100  | -2.47104600 | -1.60244500 |
| C | -1.54379800  | 0.66709000  | -1.39560800 |
| H | -3.33213100  | 1.74381600  | -0.91595100 |
| C | -0.95572200  | -0.56274100 | -1.69723300 |
| H | -1.35598000  | -2.65270600 | -2.04145600 |
| H | -0.91529900  | 1.54902500  | -1.30518900 |
| C | -5.92156300  | -1.44658400 | 3.28868200  |
| C | -6.72450400  | -1.95832000 | 2.26926100  |
| C | -6.47596700  | -1.60942700 | 0.94099500  |
| C | -5.42328000  | -0.75026000 | 0.60946100  |
| C | -4.61786200  | -0.24648700 | 1.63902400  |
| C | -4.86745200  | -0.58801700 | 2.96782300  |
| H | -6.11316100  | -1.71495800 | 4.32383400  |
| H | -7.54814100  | -2.62627700 | 2.50582000  |
| H | -7.11695900  | -1.99335200 | 0.15196500  |

|    |             |             |             |
|----|-------------|-------------|-------------|
| H  | -3.78061700 | 0.40171900  | 1.39852500  |
| H  | -4.23656100 | -0.18333600 | 3.75522000  |
| C  | 1.13749100  | -1.29645700 | -0.47801200 |
| C  | 0.54239000  | -0.70093500 | -1.78409000 |
| H  | 0.82359000  | -1.34762800 | -2.62415400 |
| H  | 0.99447300  | 0.28159500  | -1.96207200 |
| H  | 0.72674400  | -2.31138000 | -0.38025900 |
| C  | 2.65440400  | -1.40264700 | -0.49020900 |
| C  | 3.28193800  | -1.96212400 | 0.66954200  |
| C  | 3.44333500  | -1.00093400 | -1.54457900 |
| C  | 4.64403400  | -2.03167000 | 0.78714700  |
| H  | 2.65358200  | -2.32445200 | 1.47852100  |
| C  | 4.87925300  | -1.03639300 | -1.48817400 |
| H  | 2.99130200  | -0.65725500 | -2.46947300 |
| C  | 5.45573400  | -1.45793800 | -0.23934500 |
| H  | 5.11312900  | -2.46710800 | 1.66319700  |
| H  | 5.44480200  | -1.06828900 | -2.41579900 |
| Br | 7.38428900  | -2.05038400 | -0.29043800 |
| C  | -0.32915500 | 1.03949200  | 2.86785000  |
| C  | -0.97533400 | -0.14104200 | 2.49810000  |
| C  | -0.48689500 | -0.90444800 | 1.43714500  |
| C  | 0.65244900  | -0.50469000 | 0.73126500  |
| C  | 1.30012400  | 0.67425300  | 1.11814600  |
| C  | 0.81329000  | 1.44442500  | 2.17368900  |
| H  | -0.70787600 | 1.63583900  | 3.69332700  |
| H  | -1.86196100 | -0.47270000 | 3.03032500  |
| H  | -1.01040800 | -1.80829800 | 1.13949100  |
| H  | 2.20074900  | 0.97480300  | 0.59352500  |
| H  | 1.32807900  | 2.35880800  | 2.45817800  |
| Ni | 5.57065400  | 0.48014000  | -0.38191500 |
| C  | 6.33601500  | 2.21900500  | -1.34428000 |
| C  | 4.96262100  | 2.27155600  | -1.36525700 |
| C  | 4.08866700  | 2.97087900  | -0.34843300 |
| C  | 4.55940800  | 2.81690700  | 1.12756700  |

|   |            |            |             |
|---|------------|------------|-------------|
| C | 5.18860500 | 1.47117400 | 1.44535000  |
| C | 6.53244100 | 1.17763600 | 1.37472400  |
| C | 7.63304800 | 2.08113100 | 0.86290800  |
| C | 7.22860000 | 2.94972900 | -0.35763400 |
| H | 6.83517600 | 1.77732000 | -2.20681300 |
| H | 4.45044600 | 1.90487600 | -2.25208100 |
| H | 3.07891200 | 2.55893800 | -0.44597100 |
| H | 3.99975900 | 4.04239900 | -0.58359100 |
| H | 5.25862400 | 3.61881400 | 1.37963700  |
| H | 3.68994400 | 2.95896400 | 1.77909800  |
| H | 4.54365600 | 0.74992500 | 1.94480300  |
| H | 6.87167900 | 0.25913700 | 1.84864400  |
| H | 8.47118500 | 1.43650700 | 0.57386800  |
| H | 8.01202500 | 2.73525000 | 1.66311800  |
| H | 6.73494500 | 3.86602500 | -0.02275700 |
| H | 8.14136200 | 3.26884000 | -0.87321400 |

### TS1f

SCF Energy (a.u.) = -1887.163810

Thermal correction to Gibbs free energy (a.u.) = 0.662948

Charge = 0, Multiplicity = 1

|   |              |             |             |
|---|--------------|-------------|-------------|
| C | -7.58387200  | -0.09206900 | -1.25598500 |
| C | -8.47252500  | -1.15995800 | -1.44858700 |
| C | -9.82606200  | -1.03277000 | -1.16147100 |
| C | -10.34780900 | 0.17605400  | -0.66703400 |
| C | -9.45458300  | 1.24238500  | -0.47699000 |
| C | -8.09870300  | 1.11157200  | -0.76457900 |
| H | -8.09240900  | -2.10506600 | -1.83053200 |
| H | -10.48552100 | -1.87958700 | -1.32544300 |
| H | -9.83253200  | 2.18695400  | -0.09328400 |
| H | -7.42671400  | 1.94710200  | -0.58998700 |
| C | -11.76880600 | 0.36802200  | -0.34551500 |
| C | -12.75890200 | -0.52504600 | -0.46745100 |
| H | -12.01530300 | 1.35970300  | 0.03376000  |

|   |              |             |             |
|---|--------------|-------------|-------------|
| H | -13.77815600 | -0.26903800 | -0.19585300 |
| H | -12.59890200 | -1.53372100 | -0.83824900 |
| C | -5.38203600  | -0.88154800 | -0.27066200 |
| C | -6.10722100  | -0.26922400 | -1.50147000 |
| H | -5.94146500  | -0.92703900 | -2.36311100 |
| H | -5.65549000  | 0.69979500  | -1.73933500 |
| H | -5.92451600  | -1.79943600 | -0.01154800 |
| C | -3.93702000  | -1.26197200 | -0.54320100 |
| C | -3.33431400  | -2.24811000 | 0.24990800  |
| C | -3.14761100  | -0.61470700 | -1.49812100 |
| C | -1.98191900  | -2.54724200 | 0.12014600  |
| H | -3.93341500  | -2.76842200 | 0.99354800  |
| C | -1.78961000  | -0.90877900 | -1.62117900 |
| H | -3.58066600  | 0.14501100  | -2.14066900 |
| C | -1.18111300  | -1.86259500 | -0.80323500 |
| H | -1.53413700  | -3.30464400 | 0.76005900  |
| H | -1.18538500  | -0.35890300 | -2.33770000 |
| C | -5.78195800  | 1.85867600  | 3.06556500  |
| C | -6.63991500  | 0.76550900  | 2.94406600  |
| C | -6.49136900  | -0.12551400 | 1.88026000  |
| C | -5.48526400  | 0.05737200  | 0.92602700  |
| C | -4.62372800  | 1.15404400  | 1.05967900  |
| C | -4.77364100  | 2.04966900  | 2.11792500  |
| H | -5.89575100  | 2.55506600  | 3.89163000  |
| H | -7.42883500  | 0.60646500  | 3.67400600  |
| H | -7.17514500  | -0.96376500 | 1.77722000  |
| H | -3.82134400  | 1.29824100  | 0.34232700  |
| H | -4.10102800  | 2.89941200  | 2.20359900  |
| C | 0.96224100   | -1.30679200 | 0.39382900  |
| C | 0.31564300   | -2.04369300 | -0.81075800 |
| H | 0.58888800   | -3.10490800 | -0.75993600 |
| H | 0.72597700   | -1.64385600 | -1.74434600 |
| H | 0.53663700   | -1.75781800 | 1.29952900  |
| C | 2.47216300   | -1.43935700 | 0.47259100  |

|    |             |             |             |
|----|-------------|-------------|-------------|
| C  | 3.09793300  | -1.14032400 | 1.71309800  |
| C  | 3.27042300  | -1.79062500 | -0.60469900 |
| C  | 4.46848200  | -1.09934300 | 1.85306800  |
| H  | 2.46998600  | -0.89897300 | 2.56786100  |
| C  | 4.68316100  | -1.76802000 | -0.51255400 |
| H  | 2.82225300  | -2.12443600 | -1.53523600 |
| C  | 5.25097100  | -1.28393000 | 0.69186400  |
| H  | 4.93554200  | -0.83404000 | 2.79520700  |
| H  | 5.28944300  | -2.23405400 | -1.27987400 |
| Br | 7.37080600  | -1.79600700 | 0.90243100  |
| C  | -0.30685700 | 2.83886600  | 0.28994600  |
| C  | -0.92756600 | 1.93443000  | 1.15221400  |
| C  | -0.50105800 | 0.60648000  | 1.19937900  |
| C  | 0.55268000  | 0.16302000  | 0.39411400  |
| C  | 1.17530000  | 1.07984600  | -0.46205300 |
| C  | 0.74623700  | 2.40566100  | -0.51941400 |
| H  | -0.63828700 | 3.87266600  | 0.24899800  |
| H  | -1.74740600 | 2.25510300  | 1.78831100  |
| H  | -1.00920600 | -0.09938800 | 1.85021400  |
| H  | 2.00445700  | 0.75004900  | -1.08176800 |
| H  | 1.23350100  | 3.10173600  | -1.19731600 |
| Ni | 5.99463800  | 0.03952700  | -0.37432000 |
| C  | 7.22724700  | 1.04802100  | -1.78530700 |
| C  | 5.97217700  | 0.85829400  | -2.32097700 |
| C  | 4.82153100  | 1.84366400  | -2.28984700 |
| C  | 4.69537300  | 2.64648600  | -0.96712900 |
| C  | 5.01436600  | 1.82450300  | 0.26875100  |
| C  | 6.25305300  | 1.73518700  | 0.87242700  |
| C  | 7.54006100  | 2.37223600  | 0.39122500  |
| C  | 7.73303600  | 2.33069700  | -1.14783200 |
| H  | 7.98008200  | 0.29177200  | -2.00478900 |
| H  | 5.82523400  | -0.00835000 | -2.96363100 |
| H  | 3.89969500  | 1.26969700  | -2.44055000 |
| H  | 4.88748100  | 2.54370600  | -3.13710800 |

|   |            |            |             |
|---|------------|------------|-------------|
| H | 5.33430200 | 3.53297500 | -1.00350500 |
| H | 3.66754100 | 3.01535400 | -0.88432400 |
| H | 4.15508500 | 1.44268100 | 0.81463500  |
| H | 6.29330900 | 1.31073300 | 1.87387100  |
| H | 8.36706300 | 1.82910900 | 0.86198300  |
| H | 7.61986100 | 3.41449900 | 0.73747600  |
| H | 7.24401000 | 3.19027700 | -1.61406600 |
| H | 8.80149000 | 2.43639200 | -1.36637200 |

### im2f

SCF Energy (a.u.) = -1887.200889

Thermal correction to Gibbs free energy (a.u.) = 0.662682

Charge = 0, Multiplicity = 1

|   |             |             |             |
|---|-------------|-------------|-------------|
| C | 8.16510200  | -0.51689200 | 1.10028800  |
| C | 8.92633100  | -1.69115400 | 1.00548100  |
| C | 10.26791800 | -1.65414300 | 0.64575500  |
| C | 10.90570400 | -0.43255200 | 0.36484200  |
| C | 10.14005500 | 0.74016400  | 0.46225700  |
| C | 8.79566200  | 0.69971400  | 0.82177700  |
| H | 8.45494500  | -2.64827300 | 1.21830500  |
| H | 10.82723100 | -2.58279000 | 0.58499500  |
| H | 10.60904100 | 1.69737800  | 0.24748100  |
| H | 8.22187800  | 1.62087100  | 0.87071800  |
| C | 12.32016500 | -0.33270700 | -0.02075100 |
| C | 13.19933500 | -1.33318900 | -0.15825300 |
| H | 12.66491300 | 0.68371700  | -0.21084100 |
| H | 14.22609400 | -1.13777600 | -0.45116500 |
| H | 12.93781500 | -2.37373200 | 0.01319300  |
| C | 5.83252300  | -0.84496700 | 0.15217100  |
| C | 6.69334500  | -0.58047200 | 1.41928500  |
| H | 6.49584500  | -1.37961400 | 2.14381200  |
| H | 6.37619900  | 0.36180500  | 1.87870200  |
| H | 6.24568700  | -1.74213400 | -0.32571100 |
| C | 4.37039500  | -1.11877400 | 0.45892200  |

|   |             |             |             |
|---|-------------|-------------|-------------|
| C | 3.61254600  | -1.86271300 | -0.45580900 |
| C | 3.71725700  | -0.59232600 | 1.57716100  |
| C | 2.24415400  | -2.04064200 | -0.27853100 |
| H | 4.10343400  | -2.28676300 | -1.32871600 |
| C | 2.34360900  | -0.76307200 | 1.74888100  |
| H | 4.27147700  | -0.02121000 | 2.31499800  |
| C | 1.58227700  | -1.47126900 | 0.81714400  |
| H | 1.67535000  | -2.60812000 | -1.01199000 |
| H | 1.84922700  | -0.30416300 | 2.60081400  |
| C | 6.37485200  | 2.46528200  | -2.59545300 |
| C | 7.10905100  | 1.28972700  | -2.75345100 |
| C | 6.91307300  | 0.21975100  | -1.87921300 |
| C | 5.98195100  | 0.30401400  | -0.83876000 |
| C | 5.24393800  | 1.48576400  | -0.69193600 |
| C | 5.44179100  | 2.55886700  | -1.56022900 |
| H | 6.52558100  | 3.30051700  | -3.27371200 |
| H | 7.83809200  | 1.20441300  | -3.55457500 |
| H | 7.50164400  | -0.68656900 | -1.99318100 |
| H | 4.49784200  | 1.56003100  | 0.09348500  |
| H | 4.86460600  | 3.47070900  | -1.42908200 |
| C | -0.55685500 | -0.48273400 | -0.07664900 |
| C | 0.07808200  | -1.50058000 | 0.91116500  |
| H | -0.31388700 | -2.49940600 | 0.68345000  |
| H | -0.22803100 | -1.25381300 | 1.93357300  |
| H | -0.23383600 | -0.78594100 | -1.08091100 |
| C | -2.07828100 | -0.48334000 | -0.07313000 |
| C | -2.74917600 | 0.14456900  | -1.13294200 |
| C | -2.84898400 | -1.05482500 | 0.94192500  |
| C | -4.14031700 | 0.20336900  | -1.17821900 |
| H | -2.16717800 | 0.59476700  | -1.93439900 |
| C | -4.24848700 | -0.99244400 | 0.90764000  |
| H | -2.37161300 | -1.56428500 | 1.77312400  |
| C | -4.90315100 | -0.35888500 | -0.14831000 |
| H | -4.62814800 | 0.66976400  | -2.03045500 |

|    |             |             |             |
|----|-------------|-------------|-------------|
| H  | -4.81625000 | -1.46420300 | 1.70653500  |
| Br | -6.87029100 | -2.09095100 | -1.54919300 |
| C  | 1.17491500  | 3.41106300  | 0.71220800  |
| C  | 1.65118000  | 2.62879200  | -0.34059600 |
| C  | 1.07268600  | 1.38738700  | -0.60650000 |
| C  | 0.01041600  | 0.90963900  | 0.16840300  |
| C  | -0.46553500 | 1.70503900  | 1.21739100  |
| C  | 0.11316400  | 2.94430100  | 1.49078300  |
| H  | 1.62372300  | 4.37791100  | 0.92300800  |
| H  | 2.47440600  | 2.97805300  | -0.95721500 |
| H  | 1.46672000  | 0.77080000  | -1.40935900 |
| H  | -1.29937800 | 1.34973000  | 1.81722300  |
| H  | -0.26748300 | 3.54869200  | 2.31005200  |
| Ni | -6.78137700 | -0.23534600 | -0.12739300 |
| C  | -9.14412300 | 0.29144000  | -0.42420700 |
| C  | -9.00445200 | -0.57996200 | 0.60602800  |
| C  | -8.84722700 | -0.26062700 | 2.07463900  |
| C  | -8.00689500 | 1.00229400  | 2.37451900  |
| C  | -6.78172800 | 1.14379700  | 1.48755100  |
| C  | -6.71671200 | 1.80687500  | 0.27547200  |
| C  | -7.84335300 | 2.46447400  | -0.48738000 |
| C  | -9.22762000 | 1.79572200  | -0.32578600 |
| H  | -9.25027500 | -0.13608000 | -1.41868400 |
| H  | -9.05135200 | -1.63770700 | 0.36095300  |
| H  | -8.36334400 | -1.12360900 | 2.54584400  |
| H  | -9.83363800 | -0.16930000 | 2.55213400  |
| H  | -8.62544500 | 1.90003700  | 2.29809600  |
| H  | -7.67329800 | 0.95252800  | 3.41632100  |
| H  | -5.82963200 | 0.90766400  | 1.95506800  |
| H  | -5.72390400 | 2.06287800  | -0.08563200 |
| H  | -7.56780400 | 2.45798200  | -1.54889400 |
| H  | -7.90652800 | 3.52476300  | -0.19884700 |
| H  | -9.69009600 | 2.09402400  | 0.61744600  |
| H  | -9.88339400 | 2.16675700  | -1.12072500 |

**im3f**

SCF Energy (a.u.) = -1897.567666

Thermal correction to Gibbs free energy (a.u.) = 0.601278

Charge = 0, Multiplicity = 1

|   |             |             |             |
|---|-------------|-------------|-------------|
| C | 7.67223400  | -0.48048100 | -1.18857400 |
| C | 8.35941000  | 0.54322000  | -1.85717700 |
| C | 9.66095100  | 0.88437000  | -1.51039600 |
| C | 10.33130900 | 0.21017600  | -0.47405200 |
| C | 9.63981700  | -0.81459300 | 0.19131100  |
| C | 8.33528200  | -1.15328900 | -0.15761200 |
| H | 7.86174400  | 1.07894600  | -2.66275500 |
| H | 10.16340000 | 1.68031100  | -2.05163100 |
| H | 10.13506500 | -1.34964500 | 0.99798900  |
| H | 7.81703000  | -1.93757800 | 0.38684100  |
| C | 11.70607100 | 0.52805300  | -0.06370200 |
| C | 12.51520700 | 1.46088800  | -0.58125700 |
| H | 12.08333300 | -0.08047400 | 0.75813600  |
| H | 13.51829800 | 1.60729500  | -0.19322500 |
| H | 12.21771000 | 2.10810300  | -1.40171000 |
| C | 5.24841700  | 0.14769500  | -0.77528100 |
| C | 6.23577800  | -0.78796800 | -1.52647200 |
| H | 6.06690100  | -0.67576300 | -2.60425600 |
| H | 6.01203200  | -1.82850200 | -1.26784300 |
| H | 5.56723400  | 1.17604600  | -0.98738100 |
| C | 3.80701200  | 0.00744000  | -1.23326600 |
| C | 2.92066800  | 1.07099900  | -1.01146200 |
| C | 3.29526300  | -1.16965100 | -1.78614600 |
| C | 1.56455100  | 0.94636100  | -1.29295300 |
| H | 3.30095500  | 1.99735500  | -0.58708600 |
| C | 1.93299300  | -1.29768100 | -2.06020100 |
| H | 3.95146300  | -2.01106300 | -1.98327900 |
| C | 1.04550700  | -0.25267300 | -1.80017700 |
| H | 0.89366300  | 1.77748500  | -1.08677800 |

|    |             |             |             |
|----|-------------|-------------|-------------|
| H  | 1.54928800  | -2.23987000 | -2.44218000 |
| C  | 5.68908700  | -0.50578300 | 3.48821100  |
| C  | 6.34344400  | 0.55796600  | 2.86677200  |
| C  | 6.18057400  | 0.77601400  | 1.49796400  |
| C  | 5.36233300  | -0.05959800 | 0.73094000  |
| C  | 4.70451100  | -1.12223200 | 1.36435000  |
| C  | 4.86950000  | -1.34581800 | 2.73073500  |
| H  | 5.81400500  | -0.67843200 | 4.55351200  |
| H  | 6.98452100  | 1.21770400  | 3.44496900  |
| H  | 6.70786800  | 1.59347300  | 1.01364800  |
| H  | 4.04663000  | -1.76682700 | 0.78889200  |
| H  | 4.35550500  | -2.17704400 | 3.20680700  |
| C  | -1.06790700 | -0.68164300 | -0.50963500 |
| C  | -0.44357200 | -0.45310000 | -1.91350000 |
| H  | -0.92370200 | 0.42212600  | -2.37039400 |
| H  | -0.65554000 | -1.31457500 | -2.55626500 |
| H  | -0.79233800 | 0.19496500  | 0.08936500  |
| C  | -2.58647800 | -0.73709800 | -0.51623100 |
| C  | -3.25896900 | -0.50689800 | 0.69280100  |
| C  | -3.34900400 | -0.98422600 | -1.65991800 |
| C  | -4.64835900 | -0.45498900 | 0.75109800  |
| H  | -2.67931900 | -0.34980700 | 1.59906300  |
| C  | -4.75079100 | -0.93360700 | -1.62041300 |
| H  | -2.86359700 | -1.19369800 | -2.60809100 |
| C  | -5.38316800 | -0.61499600 | -0.42502600 |
| H  | -5.14481200 | -0.25426800 | 1.69455400  |
| H  | -5.32146300 | -1.11335600 | -2.52705300 |
| Br | -7.94952400 | -2.02834300 | 0.56943800  |
| C  | 0.82583800  | -4.11947000 | 1.32130000  |
| C  | 1.26303600  | -2.82895100 | 1.62327100  |
| C  | 0.63436100  | -1.72487700 | 1.04765500  |
| C  | -0.44030700 | -1.89212500 | 0.16659100  |
| C  | -0.87595100 | -3.18935400 | -0.12575700 |
| C  | -0.24668100 | -4.29611100 | 0.44453200  |

|    |             |             |             |
|----|-------------|-------------|-------------|
| H  | 1.31255900  | -4.98130400 | 1.76936700  |
| H  | 2.09183900  | -2.67576700 | 2.30865200  |
| H  | 0.99533100  | -0.72386200 | 1.26644400  |
| H  | -1.72101900 | -3.33118200 | -0.79414200 |
| H  | -0.59900000 | -5.29677600 | 0.20948100  |
| Ni | -7.17040300 | -0.12929500 | -0.37506600 |
| C  | -2.90499800 | 2.97350100  | 0.54053600  |
| C  | -3.14032800 | 2.60066600  | -0.78010000 |
| C  | -4.44344200 | 2.32975900  | -1.17748800 |
| C  | -5.50851200 | 2.40902500  | -0.26615300 |
| C  | -5.23984500 | 2.83506600  | 1.04352600  |
| C  | -3.93994900 | 3.11710700  | 1.45845300  |
| H  | -2.32058300 | 2.50604300  | -1.48218800 |
| H  | -4.62261800 | 2.02127400  | -2.20018600 |
| H  | -6.05433700 | 2.91010600  | 1.75932800  |
| H  | -3.73762200 | 3.42022700  | 2.47913100  |
| C  | -6.86977700 | 1.98440600  | -0.61688800 |
| C  | -7.25582400 | 1.33470400  | -1.77870300 |
| H  | -7.65216100 | 2.34521800  | 0.05258300  |
| H  | -8.30898100 | 1.29581400  | -2.05476400 |
| H  | -6.55167700 | 1.11453600  | -2.57419500 |
| Br | -1.06367800 | 3.26468000  | 1.11768900  |

### TS2f

SCF Energy (a.u.) = -1897.551216

Thermal correction to Gibbs free energy (a.u.) = 0.601040

Charge = 0, Multiplicity = 1

|   |             |             |             |
|---|-------------|-------------|-------------|
| C | 9.07384400  | -0.60052100 | 0.28195500  |
| C | 9.97667100  | -1.00717000 | -0.71136500 |
| C | 11.25398400 | -0.46596300 | -0.79035900 |
| C | 11.68158000 | 0.51009900  | 0.12747800  |
| C | 10.77482800 | 0.91270100  | 1.12080700  |
| C | 9.49526300  | 0.36940100  | 1.19676200  |
| H | 9.66898300  | -1.76145100 | -1.43248800 |

|   |             |             |             |
|---|-------------|-------------|-------------|
| H | 11.92777300 | -0.80679900 | -1.57055400 |
| H | 11.08035400 | 1.66751400  | 1.84133100  |
| H | 8.80760600  | 0.71323300  | 1.96429500  |
| C | 13.01901100 | 1.11797500  | 0.09183400  |
| C | 14.00832500 | 0.85842700  | -0.77221000 |
| H | 13.19717600 | 1.86158900  | 0.86855300  |
| H | 14.96084100 | 1.37405800  | -0.70144200 |
| H | 13.91339700 | 0.13153300  | -1.57416200 |
| C | 6.72537800  | -0.35653800 | -0.64719600 |
| C | 7.66715500  | -1.14166000 | 0.30800500  |
| H | 7.66000700  | -2.19718200 | 0.01056500  |
| H | 7.27169000  | -1.08763600 | 1.32793100  |
| H | 7.20658400  | -0.35846900 | -1.63323500 |
| C | 5.35355400  | -0.98924700 | -0.80439500 |
| C | 4.61833900  | -0.73464600 | -1.97017800 |
| C | 4.75050800  | -1.75511700 | 0.19772500  |
| C | 3.31369700  | -1.19657300 | -2.11197300 |
| H | 5.07260800  | -0.14741200 | -2.76475800 |
| C | 3.43911200  | -2.20938200 | 0.05926800  |
| H | 5.29219200  | -1.98574400 | 1.10923200  |
| C | 2.69468100  | -1.92223400 | -1.08626600 |
| H | 2.75896000  | -0.97178300 | -3.02063900 |
| H | 2.97516400  | -2.76215600 | 0.87152200  |
| C | 6.52342100  | 3.76017500  | 0.69796100  |
| C | 7.37717900  | 3.39993400  | -0.34471800 |
| C | 7.42048000  | 2.07740100  | -0.78823900 |
| C | 6.61238500  | 1.09736400  | -0.20281300 |
| C | 5.75309200  | 1.46934000  | 0.83919800  |
| C | 5.71212800  | 2.78870300  | 1.28893400  |
| H | 6.48868600  | 4.78837200  | 1.04702500  |
| H | 8.01436500  | 4.14596000  | -0.81153100 |
| H | 8.10284800  | 1.79642600  | -1.58589500 |
| H | 5.10092300  | 0.72726600  | 1.28986400  |
| H | 5.04498600  | 3.05934700  | 2.10342900  |

|    |             |             |             |
|----|-------------|-------------|-------------|
| C  | 0.36027700  | -1.00275800 | -0.86406600 |
| C  | 1.22662100  | -2.25850800 | -1.15702800 |
| H  | 0.96268900  | -2.64836500 | -2.14811900 |
| H  | 0.99150500  | -3.03824800 | -0.42399300 |
| H  | 0.59384200  | -0.27433200 | -1.65217000 |
| C  | -1.13984900 | -1.25466800 | -0.91702300 |
| C  | -2.00435900 | -0.15461300 | -0.77636200 |
| C  | -1.70216700 | -2.52231300 | -1.09355100 |
| C  | -3.38521900 | -0.30937100 | -0.80754600 |
| H  | -1.57857400 | 0.83426000  | -0.62737100 |
| C  | -3.08996100 | -2.69897800 | -1.12418900 |
| H  | -1.06577200 | -3.39180200 | -1.21569200 |
| C  | -3.93378300 | -1.59854400 | -0.93380200 |
| H  | -4.03296300 | 0.55585700  | -0.69827500 |
| H  | -3.50334400 | -3.69276700 | -1.27302100 |
| Br | -6.63818000 | -2.42167100 | 1.97400600  |
| C  | 1.67268300  | 0.69842200  | 2.89541900  |
| C  | 2.10495300  | 1.24592200  | 1.68693500  |
| C  | 1.65720100  | 0.71189300  | 0.47839100  |
| C  | 0.77308900  | -0.37146400 | 0.45903300  |
| C  | 0.33959200  | -0.91075500 | 1.67601600  |
| C  | 0.78709300  | -0.38183700 | 2.88636600  |
| H  | 2.01876700  | 1.11209700  | 3.83845400  |
| H  | 2.79297400  | 2.08605400  | 1.67757900  |
| H  | 2.01944700  | 1.12325800  | -0.45947300 |
| H  | -0.35640200 | -1.74567300 | 1.67472400  |
| H  | 0.44034800  | -0.81032500 | 3.82257500  |
| Ni | -5.49039700 | -1.92066200 | 0.05163200  |
| C  | -8.45384600 | 2.43461200  | -0.49800200 |
| C  | -7.31420700 | 2.31578200  | -1.28769200 |
| C  | -6.79953700 | 1.04558800  | -1.53688000 |
| C  | -7.40970400 | -0.10283900 | -1.00574800 |
| C  | -8.55965900 | 0.05869800  | -0.21412900 |
| C  | -9.08743600 | 1.31934300  | 0.04440100  |

|    |             |             |             |
|----|-------------|-------------|-------------|
| H  | -6.83831000 | 3.19512800  | -1.70614200 |
| H  | -5.91720800 | 0.96013800  | -2.16263600 |
| H  | -9.02401800 | -0.81676200 | 0.22877600  |
| H  | -9.97013800 | 1.43115800  | 0.66310300  |
| C  | -6.89176600 | -1.46500200 | -1.23433700 |
| C  | -5.73646900 | -1.75903400 | -2.01645200 |
| H  | -7.61078600 | -2.26574700 | -1.07324100 |
| H  | -5.63585800 | -2.76207800 | -2.42114400 |
| H  | -5.30909500 | -0.99094900 | -2.65017800 |
| Br | -9.18296600 | 4.21020500  | -0.14595700 |

#### im4f

SCF Energy (a.u.) = -1897.586131

Thermal correction to Gibbs free energy (a.u.) = 0.605207

Charge = 0, Multiplicity = 1

|   |             |             |             |
|---|-------------|-------------|-------------|
| C | 8.37369300  | -0.18917700 | 0.81235600  |
| C | 9.42792600  | -0.90861700 | 0.23085900  |
| C | 10.69732100 | -0.35668100 | 0.10974500  |
| C | 10.96411200 | 0.94559500  | 0.56889600  |
| C | 9.90594100  | 1.66118500  | 1.15132700  |
| C | 8.63481300  | 1.10592700  | 1.27029500  |
| H | 9.24605800  | -1.91832300 | -0.13117000 |
| H | 11.49059700 | -0.94363400 | -0.34310600 |
| H | 10.08569500 | 2.67094800  | 1.51230500  |
| H | 7.82975800  | 1.68914200  | 1.70832100  |
| C | 12.28547700 | 1.58047600  | 0.46683400  |
| C | 13.40417300 | 1.05377500  | -0.04678900 |
| H | 12.32981100 | 2.59536400  | 0.86185600  |
| H | 14.32902000 | 1.62149900  | -0.06967000 |
| H | 13.44611800 | 0.04937100  | -0.45903000 |
| C | 6.20292300  | -0.53879200 | -0.45396800 |
| C | 6.98531700  | -0.77363900 | 0.86818600  |
| H | 7.03478600  | -1.85327900 | 1.05422800  |
| H | 6.43061800  | -0.32455000 | 1.69896000  |

|   |             |             |             |
|---|-------------|-------------|-------------|
| H | 6.83703000  | -0.91780000 | -1.26527300 |
| C | 4.87996100  | -1.28211100 | -0.51884800 |
| C | 4.33078600  | -1.57989900 | -1.77359800 |
| C | 4.13814500  | -1.61467500 | 0.61840500  |
| C | 3.06838000  | -2.15332900 | -1.88725100 |
| H | 4.89566500  | -1.33556300 | -2.67010300 |
| C | 2.86830500  | -2.18024800 | 0.50392700  |
| H | 4.53477900  | -1.41230100 | 1.60784900  |
| C | 2.30679400  | -2.44006500 | -0.74734000 |
| H | 2.65771600  | -2.35963000 | -2.87357700 |
| H | 2.29003100  | -2.38484600 | 1.40073200  |
| C | 5.74251100  | 3.73202300  | -1.04063300 |
| C | 6.76027700  | 3.03627400  | -1.69329100 |
| C | 6.88890600  | 1.65768700  | -1.51824400 |
| C | 6.00453200  | 0.95348900  | -0.69472500 |
| C | 4.98106400  | 1.65905100  | -0.04860700 |
| C | 4.85383200  | 3.03751400  | -0.21654800 |
| H | 5.64073300  | 4.80549100  | -1.17311200 |
| H | 7.45871400  | 3.56536700  | -2.33573900 |
| H | 7.69629900  | 1.12274700  | -2.01099800 |
| H | 4.27023100  | 1.12570800  | 0.57549100  |
| H | 4.05865100  | 3.57136500  | 0.29757900  |
| C | -0.03996300 | -1.67101700 | -1.22676900 |
| C | 0.86945400  | -2.87836100 | -0.87053500 |
| H | 0.76249800  | -3.64843100 | -1.64515700 |
| H | 0.53402700  | -3.31440700 | 0.07711900  |
| H | 0.29564300  | -1.30277400 | -2.20542900 |
| C | -1.51698800 | -2.01730500 | -1.35108700 |
| C | -2.40925700 | -1.00292600 | -1.70093600 |
| C | -2.03688500 | -3.29782300 | -1.07228200 |
| C | -3.79893700 | -1.21808700 | -1.70016200 |
| H | -2.02691000 | -0.01320000 | -1.93177300 |
| C | -3.40482100 | -3.53090300 | -1.06298800 |
| H | -1.36637300 | -4.11110100 | -0.82094500 |

|    |             |             |             |
|----|-------------|-------------|-------------|
| C  | -4.32183900 | -2.49327900 | -1.34881900 |
| H  | -4.46117800 | -0.42663900 | -2.03552000 |
| H  | -3.78700500 | -4.51442200 | -0.80462600 |
| Br | -4.13712400 | -0.93733300 | 2.67068600  |
| C  | 0.59146300  | 1.51315200  | 1.64174400  |
| C  | 1.23529700  | 1.54407100  | 0.40370900  |
| C  | 1.01622900  | 0.52582100  | -0.52502300 |
| C  | 0.15492800  | -0.53513900 | -0.22859100 |
| C  | -0.48331900 | -0.56064900 | 1.01762100  |
| C  | -0.27138900 | 0.45777700  | 1.94623200  |
| H  | 0.75445900  | 2.30948900  | 2.36246400  |
| H  | 1.90689400  | 2.35977200  | 0.15247300  |
| H  | 1.53594100  | 0.54461600  | -1.47884000 |
| H  | -1.16592900 | -1.36817400 | 1.26759600  |
| H  | -0.79437200 | 0.42730200  | 2.89724700  |
| Ni | -4.29073800 | -1.36009500 | 0.42340600  |
| C  | -8.11868500 | 2.00646300  | -0.37289500 |
| C  | -7.70052300 | 1.35123600  | -1.52502500 |
| C  | -7.05824700 | 0.11933700  | -1.40268300 |
| C  | -6.82715200 | -0.46742800 | -0.14588900 |
| C  | -7.27109500 | 0.23192700  | 0.99495000  |
| C  | -7.91385200 | 1.45955300  | 0.89242200  |
| H  | -7.87515100 | 1.78618800  | -2.50252200 |
| H  | -6.75127600 | -0.38783300 | -2.31141300 |
| H  | -7.07699400 | -0.18851400 | 1.97657800  |
| H  | -8.24323900 | 1.98454100  | 1.78163900  |
| C  | -6.12845900 | -1.75877300 | 0.03857900  |
| C  | -5.82600900 | -2.66378900 | -1.16068400 |
| H  | -6.46569100 | -2.29542200 | 0.92611100  |
| H  | -6.05213900 | -3.70704800 | -0.92460100 |
| H  | -6.38621200 | -2.40066900 | -2.06413200 |
| Br | -9.01800500 | 3.73346400  | -0.53264200 |

SCF Energy (a.u.) = -2038.628845

Thermal correction to Gibbs free energy (a.u.) = 0.669341

Charge = 0, Multiplicity = 1

|   |             |             |             |
|---|-------------|-------------|-------------|
| C | 8.28357000  | -0.19014000 | 0.80008300  |
| C | 9.33955100  | -0.89685900 | 0.20628700  |
| C | 10.60516700 | -0.33612700 | 0.08601600  |
| C | 10.86624800 | 0.96257700  | 0.55836500  |
| C | 9.80636800  | 1.66542500  | 1.15307600  |
| C | 8.53903800  | 1.10137300  | 1.27119800  |
| H | 9.16206600  | -1.90353500 | -0.16619700 |
| H | 11.39995500 | -0.91335000 | -0.37658600 |
| H | 9.98169500  | 2.67223800  | 1.52433600  |
| H | 7.73242200  | 1.67499100  | 1.71892000  |
| C | 12.18339300 | 1.60639200  | 0.45771200  |
| C | 13.30273900 | 1.09234500  | -0.06719400 |
| H | 12.22360400 | 2.61687600  | 0.86429500  |
| H | 14.22412000 | 1.66576600  | -0.08773100 |
| H | 13.34860200 | 0.09313400  | -0.49145900 |
| C | 6.10880800  | -0.53690100 | -0.46019600 |
| C | 6.89889200  | -0.78336400 | 0.85521900  |
| H | 6.95550800  | -1.86490700 | 1.02770400  |
| H | 6.34556500  | -0.34777700 | 1.69407800  |
| H | 6.74123500  | -0.90201800 | -1.27913100 |
| C | 4.78976200  | -1.28685800 | -0.52806900 |
| C | 4.23635100  | -1.57222100 | -1.78392300 |
| C | 4.05455100  | -1.63649100 | 0.60828400  |
| C | 2.97608400  | -2.14999700 | -1.89891600 |
| H | 4.79604700  | -1.31441700 | -2.67990800 |
| C | 2.78657100  | -2.20605700 | 0.49229900  |
| H | 4.45467800  | -1.44400500 | 1.59833600  |
| C | 2.22030300  | -2.45344100 | -0.75931300 |
| H | 2.56183200  | -2.34620700 | -2.88574400 |
| H | 2.21291900  | -2.42397400 | 1.38905000  |
| C | 5.61718100  | 3.73744600  | -0.99391800 |

|   |             |             |             |
|---|-------------|-------------|-------------|
| C | 6.63588600  | 3.05622800  | -1.66026100 |
| C | 6.77490100  | 1.67660700  | -1.50192200 |
| C | 5.90009400  | 0.95698000  | -0.68161500 |
| C | 4.87592600  | 1.64820300  | -0.02119900 |
| C | 4.73817300  | 3.02753800  | -0.17257100 |
| H | 5.50705000  | 4.81155300  | -1.11384200 |
| H | 7.32683100  | 3.59742200  | -2.30072400 |
| H | 7.58282700  | 1.15284600  | -2.00567600 |
| H | 4.17276900  | 1.10265300  | 0.60111200  |
| H | 3.94214700  | 3.55013500  | 0.35174700  |
| C | -0.13835800 | -1.69656200 | -1.21901400 |
| C | 0.78538500  | -2.89872600 | -0.88175000 |
| H | 0.68027800  | -3.65951300 | -1.66571500 |
| H | 0.45758900  | -3.34983800 | 0.06150600  |
| H | 0.19814200  | -1.30409200 | -2.18778800 |
| C | -1.60986000 | -2.06287200 | -1.35190000 |
| C | -2.51336200 | -1.06034500 | -1.70260400 |
| C | -2.11851000 | -3.34361500 | -1.05737400 |
| C | -3.90298300 | -1.27894600 | -1.66423800 |
| H | -2.14112600 | -0.07156800 | -1.95452200 |
| C | -3.48568000 | -3.57929000 | -1.01548500 |
| H | -1.44039100 | -4.15373200 | -0.81520600 |
| C | -4.41213800 | -2.54534800 | -1.27549500 |
| H | -4.57610800 | -0.49410300 | -1.99459800 |
| H | -3.85851900 | -4.56303800 | -0.74340700 |
| C | 0.40968000  | 1.45684100  | 1.70614000  |
| C | 1.11629900  | 1.48106800  | 0.50259300  |
| C | 0.92670000  | 0.47158600  | -0.44186300 |
| C | 0.03316200  | -0.57645800 | -0.19675400 |
| C | -0.66647600 | -0.59549900 | 1.01654700  |
| C | -0.48547800 | 0.41547700  | 1.95981100  |
| H | 0.54760300  | 2.24859400  | 2.43713700  |
| H | 1.81165200  | 2.28751400  | 0.28859600  |
| H | 1.49205500  | 0.48878400  | -1.36927300 |

|    |             |             |             |
|----|-------------|-------------|-------------|
| H  | -1.38044200 | -1.38744800 | 1.22502300  |
| H  | -1.06205500 | 0.39312500  | 2.87958800  |
| Ni | -4.33216500 | -1.31874700 | 0.47733800  |
| C  | -8.24623100 | 1.96032100  | -0.34661000 |
| C  | -7.85280700 | 1.26495000  | -1.48189300 |
| C  | -7.18683600 | 0.04733600  | -1.32940800 |
| C  | -6.90692000 | -0.48568300 | -0.05986500 |
| C  | -7.32880900 | 0.25476300  | 1.06274900  |
| C  | -7.99264700 | 1.46832000  | 0.93236100  |
| H  | -8.06257600 | 1.65655800  | -2.47090100 |
| H  | -6.89475000 | -0.48860300 | -2.22670400 |
| H  | -7.10382200 | -0.12457700 | 2.05470600  |
| H  | -8.30418800 | 2.02389000  | 1.80958400  |
| C  | -6.17064500 | -1.75534700 | 0.15887200  |
| C  | -5.90561100 | -2.70674300 | -1.01813300 |
| H  | -6.50634900 | -2.26742800 | 1.06347300  |
| H  | -6.11831900 | -3.74157000 | -0.73479800 |
| H  | -6.50283200 | -2.48388100 | -1.90965500 |
| Br | -9.18312500 | 3.66778100  | -0.54619500 |
| O  | -4.21588800 | -0.75649100 | 2.14588400  |
| C  | -4.59620300 | -1.48628400 | 3.27979000  |
| C  | -3.96848800 | -0.85839700 | 4.52293800  |
| H  | -4.28933500 | -2.54585400 | 3.21398900  |
| H  | -5.69620100 | -1.48363700 | 3.39583200  |
| H  | -4.26841400 | -1.39553700 | 5.43126400  |
| H  | -2.87534300 | -0.88457700 | 4.44754800  |
| H  | -4.27773600 | 0.18838200  | 4.61288500  |

**im6f**

SCF Energy (a.u.) = -2642.358953

Thermal correction to Gibbs free energy (a.u.) = 0.905384

Charge = 0, Multiplicity = 1

|   |              |             |             |
|---|--------------|-------------|-------------|
| C | -9.21019500  | -0.09194400 | -0.64126800 |
| C | -10.27701600 | -0.85958400 | -0.15161800 |

|   |              |             |             |
|---|--------------|-------------|-------------|
| C | -11.50284900 | -0.28013800 | 0.15208800  |
| C | -11.71136300 | 1.09960800  | -0.02320300 |
| C | -10.64092900 | 1.86352100  | -0.51476000 |
| C | -9.41347900  | 1.28029500  | -0.81718800 |
| H | -10.13989100 | -1.92926900 | -0.00809700 |
| H | -12.30768500 | -0.90550900 | 0.52627400  |
| H | -10.77580000 | 2.93301700  | -0.65705100 |
| H | -8.59647200  | 1.89852100  | -1.17831400 |
| C | -12.98476800 | 1.76665400  | 0.28174000  |
| C | -14.10636800 | 1.20482800  | 0.74979600  |
| H | -12.98674200 | 2.84079900  | 0.09675000  |
| H | -14.99252300 | 1.80209200  | 0.94001200  |
| H | -14.18867100 | 0.14192200  | 0.95950400  |
| C | -7.00415500  | -0.79400500 | 0.39742100  |
| C | -7.86458600  | -0.72239300 | -0.89473800 |
| H | -7.98896000  | -1.73981200 | -1.28467900 |
| H | -7.32573900  | -0.14571300 | -1.65414500 |
| H | -7.61863700  | -1.29410000 | 1.15650100  |
| C | -5.72707200  | -1.59991200 | 0.23490800  |
| C | -5.13843600  | -2.17345700 | 1.37047800  |
| C | -5.05933700  | -1.72808500 | -0.98642500 |
| C | -3.90689300  | -2.81579900 | 1.29416100  |
| H | -5.64607200  | -2.09105700 | 2.32863400  |
| C | -3.81941200  | -2.36284300 | -1.06022400 |
| H | -5.48932800  | -1.30947400 | -1.89049900 |
| C | -3.21524900  | -2.89787300 | 0.07871600  |
| H | -3.46270900  | -3.23704400 | 2.19365300  |
| H | -3.29539800  | -2.40633300 | -2.01120200 |
| C | -6.24730300  | 3.24434800  | 1.78224800  |
| C | -7.27031000  | 2.48451800  | 2.34959300  |
| C | -7.49485700  | 1.17749700  | 1.91470600  |
| C | -6.70233900  | 0.60886600  | 0.91249200  |
| C | -5.67356400  | 1.37731700  | 0.35216500  |
| C | -5.45034400  | 2.68544000  | 0.78036500  |

|    |             |             |             |
|----|-------------|-------------|-------------|
| H  | -6.07035800 | 4.26231000  | 2.11784600  |
| H  | -7.89801400 | 2.90854900  | 3.12848400  |
| H  | -8.30613300 | 0.59612100  | 2.34445400  |
| H  | -5.03357900 | 0.94444800  | -0.41092500 |
| H  | -4.65159700 | 3.27059300  | 0.33167700  |
| C  | -0.80725900 | -2.35736200 | 0.58476900  |
| C  | -1.80061200 | -3.41569200 | 0.03058500  |
| H  | -1.69964100 | -4.33695900 | 0.61846600  |
| H  | -1.53385200 | -3.65468100 | -1.00477000 |
| H  | -1.10907600 | -2.15616900 | 1.62052100  |
| C  | 0.63986700  | -2.82264300 | 0.61576800  |
| C  | 1.56344300  | -2.06327500 | 1.32872400  |
| C  | 1.10574800  | -3.95177200 | -0.08841600 |
| C  | 2.93924100  | -2.35831400 | 1.29547800  |
| H  | 1.23234000  | -1.20028800 | 1.89444500  |
| C  | 2.45703900  | -4.25958200 | -0.13466700 |
| H  | 0.40662900  | -4.58220800 | -0.62658100 |
| C  | 3.40967400  | -3.45491100 | 0.52887200  |
| H  | 3.61068400  | -1.78558300 | 1.92567800  |
| H  | 2.80040400  | -5.11787000 | -0.70596800 |
| C  | -1.28196000 | 1.32919800  | -1.64337000 |
| C  | -1.96540700 | 1.13928700  | -0.44095300 |
| C  | -1.79341100 | -0.04065200 | 0.28353200  |
| C  | -0.93743600 | -1.04510600 | -0.18106800 |
| C  | -0.25415600 | -0.84407600 | -1.38582800 |
| C  | -0.42357900 | 0.33355500  | -2.11212700 |
| H  | -1.40267200 | 2.25281900  | -2.20197600 |
| H  | -2.62864600 | 1.90907500  | -0.05742600 |
| H  | -2.34524300 | -0.19100200 | 1.20691600  |
| H  | 0.43191300  | -1.60220700 | -1.75186100 |
| H  | 0.13213500  | 0.48031400  | -3.03235200 |
| Ni | 3.62685500  | -1.65703000 | -0.65994600 |
| C  | 7.48788200  | 0.70592500  | 1.72053200  |
| C  | 6.96226200  | -0.34297000 | 2.46481000  |

|    |             |             |             |
|----|-------------|-------------|-------------|
| C  | 6.28391100  | -1.36553500 | 1.80048500  |
| C  | 6.12521300  | -1.35652200 | 0.40404300  |
| C  | 6.68427600  | -0.27807300 | -0.30837400 |
| C  | 7.36051100  | 0.75125000  | 0.33414400  |
| H  | 7.07304600  | -0.36594600 | 3.54307600  |
| H  | 5.87476100  | -2.17575100 | 2.39473200  |
| H  | 6.53542900  | -0.23333700 | -1.38163000 |
| H  | 7.75861300  | 1.58592100  | -0.23057900 |
| C  | 5.36822800  | -2.38677300 | -0.34802500 |
| C  | 4.90632200  | -3.66799000 | 0.35541100  |
| H  | 5.08051400  | -4.54161700 | -0.27930200 |
| H  | 5.40958900  | -3.85573900 | 1.31103500  |
| Br | 8.40838200  | 2.16462700  | 2.64339300  |
| O  | 3.87234700  | -0.72853000 | -2.16820100 |
| C  | 3.98202800  | -1.41242600 | -3.38742700 |
| C  | 2.70193300  | -2.14734300 | -3.78994100 |
| H  | 4.82212400  | -2.13151800 | -3.37001100 |
| H  | 4.23117200  | -0.67543300 | -4.17158800 |
| H  | 2.80796700  | -2.63337900 | -4.76879600 |
| H  | 2.45313600  | -2.91512900 | -3.04639200 |
| H  | 1.86353800  | -1.44272800 | -3.84038200 |
| H  | 5.78736000  | -2.55765100 | -1.34159700 |
| C  | 1.98760700  | 0.99099300  | 3.27277700  |
| C  | 3.34293400  | 0.93379000  | 2.93316300  |
| C  | 3.74333500  | 1.19805700  | 1.62303900  |
| C  | 2.80163600  | 1.50278600  | 0.62523700  |
| C  | 1.44281300  | 1.53773700  | 0.98051700  |
| C  | 1.03739200  | 1.29685500  | 2.29332500  |
| H  | 1.67385500  | 0.79987500  | 4.29617500  |
| H  | 4.08757400  | 0.69713400  | 3.68895300  |
| H  | 4.79521100  | 1.17213500  | 1.36407000  |
| H  | 0.70235900  | 1.75626800  | 0.21920400  |
| H  | -0.01855900 | 1.33540000  | 2.54789200  |
| C  | 2.68997100  | 2.15236300  | -3.15205100 |

|   |            |            |             |
|---|------------|------------|-------------|
| C | 5.04680500 | 2.17946400 | -2.40840400 |
| C | 4.02240000 | 2.90429300 | -3.29494600 |
| H | 2.76905600 | 1.15799500 | -3.60552100 |
| H | 5.98492400 | 2.74596500 | -2.37002400 |
| B | 3.25965600 | 1.82516100 | -0.83381100 |
| O | 2.29881000 | 1.98699300 | -1.79479200 |
| O | 4.59222600 | 2.02441000 | -1.06848000 |
| H | 1.88694100 | 2.70226300 | -3.65779200 |
| H | 5.24933700 | 1.18090500 | -2.80903300 |
| C | 4.48367700 | 2.84522200 | -4.75535500 |
| H | 4.60530900 | 1.80943100 | -5.09425200 |
| H | 3.75732400 | 3.33449100 | -5.41525800 |
| H | 5.44458700 | 3.35779000 | -4.88246700 |
| C | 3.86242100 | 4.36473900 | -2.84448900 |
| H | 4.81375400 | 4.90249700 | -2.93208000 |
| H | 3.12206100 | 4.88249300 | -3.46578800 |
| H | 3.53415300 | 4.43030800 | -1.80338000 |

### TS3f

SCF Energy (a.u.) = -2642.353372

Thermal correction to Gibbs free energy (a.u.) = 0.906902

Charge = 0, Multiplicity = 1

|   |             |             |             |
|---|-------------|-------------|-------------|
| C | 9.31537700  | 0.09250700  | 0.56311700  |
| C | 10.38018600 | -0.78389900 | 0.30772900  |
| C | 11.59534900 | -0.31949300 | -0.18051600 |
| C | 11.79472100 | 1.04936300  | -0.43427100 |
| C | 10.72639400 | 1.92278100  | -0.17571800 |
| C | 9.50961300  | 1.45436500  | 0.31243000  |
| H | 10.25000600 | -1.84738900 | 0.49662800  |
| H | 12.39892600 | -1.02623400 | -0.36395400 |
| H | 10.85429300 | 2.98568200  | -0.36580600 |
| H | 8.69350600  | 2.15019300  | 0.48547800  |
| C | 13.05657000 | 1.59702500  | -0.95128000 |
| C | 14.17489900 | 0.92362500  | -1.24889200 |

|   |             |             |             |
|---|-------------|-------------|-------------|
| H | 13.05205300 | 2.67676100  | -1.10012900 |
| H | 15.05216000 | 1.43824400  | -1.62804200 |
| H | 14.26319800 | -0.15259600 | -1.12858000 |
| C | 7.09978500  | -0.90071900 | -0.17303200 |
| C | 7.97979800  | -0.43602000 | 1.02053000  |
| H | 8.11961100  | -1.28596600 | 1.69931500  |
| H | 7.44791100  | 0.34250600  | 1.57784000  |
| H | 7.70631300  | -1.60670300 | -0.75408900 |
| C | 5.83177500  | -1.62214400 | 0.24936300  |
| C | 5.22631400  | -2.51078500 | -0.64989600 |
| C | 5.18731800  | -1.37806400 | 1.46551800  |
| C | 4.00015400  | -3.10077200 | -0.36096600 |
| H | 5.71590200  | -2.71956500 | -1.59818100 |
| C | 3.95305200  | -1.96221200 | 1.75038600  |
| H | 5.63076200  | -0.70690900 | 2.19376500  |
| C | 3.33138600  | -2.81456600 | 0.83621100  |
| H | 3.54211800  | -3.77245500 | -1.08407300 |
| H | 3.44682300  | -1.71803700 | 2.68037400  |
| C | 6.29079500  | 2.52172800  | -2.70891200 |
| C | 7.31199800  | 1.62886800  | -3.03411700 |
| C | 7.55293800  | 0.51696700  | -2.22578900 |
| C | 6.77874300  | 0.27746100  | -1.08593800 |
| C | 5.75114700  | 1.17596600  | -0.77025800 |
| C | 5.51190400  | 2.29111000  | -1.57253200 |
| H | 6.10125300  | 3.38884700  | -3.33530300 |
| H | 7.92560200  | 1.79803400  | -3.91465700 |
| H | 8.36304500  | -0.16465000 | -2.47068700 |
| H | 5.12436800  | 0.99329500  | 0.09755800  |
| H | 4.71485300  | 2.98235400  | -1.31065100 |
| C | 0.92210700  | -2.43071500 | 0.23116100  |
| C | 1.91785400  | -3.28786900 | 1.06143700  |
| H | 1.80046700  | -4.34097100 | 0.77613100  |
| H | 1.67250200  | -3.20602100 | 2.12568300  |
| H | 1.21266900  | -2.54625200 | -0.82008300 |

|    |             |             |             |
|----|-------------|-------------|-------------|
| C  | -0.52687200 | -2.87395100 | 0.34580900  |
| C  | -1.41261200 | -2.53255500 | -0.67094500 |
| C  | -1.03024400 | -3.57769600 | 1.46022000  |
| C  | -2.79135200 | -2.80858400 | -0.57299200 |
| H  | -1.04917700 | -2.01203800 | -1.54846800 |
| C  | -2.38023200 | -3.86788100 | 1.57341300  |
| H  | -0.35800000 | -3.89096300 | 2.25170400  |
| C  | -3.29626700 | -3.47158000 | 0.57337900  |
| H  | -3.43238800 | -2.60252100 | -1.42456200 |
| H  | -2.75247200 | -4.39875100 | 2.44548900  |
| C  | 1.46617400  | 1.74854600  | 1.24221100  |
| C  | 2.06155500  | 1.21544800  | 0.09753700  |
| C  | 1.86829400  | -0.12641200 | -0.23115800 |
| C  | 1.07543300  | -0.95252000 | 0.57260700  |
| C  | 0.48298500  | -0.40921400 | 1.71732700  |
| C  | 0.67607200  | 0.93090100  | 2.05181500  |
| H  | 1.60546200  | 2.79565900  | 1.49477800  |
| H  | 2.67425900  | 1.84003800  | -0.54578400 |
| H  | 2.35417100  | -0.54114200 | -1.10978400 |
| H  | -0.15196400 | -1.02934400 | 2.34203900  |
| H  | 0.19007500  | 1.34160000  | 2.93083300  |
| Ni | -3.62915800 | -1.32280800 | 0.81144100  |
| C  | -7.67842000 | -0.12217900 | -1.89909400 |
| C  | -7.05605000 | -1.29884700 | -2.29839200 |
| C  | -6.30666600 | -2.01384500 | -1.36409100 |
| C  | -6.16927000 | -1.56976200 | -0.03798100 |
| C  | -6.82598100 | -0.37618100 | 0.32402800  |
| C  | -7.57620200 | 0.35019300  | -0.59231600 |
| H  | -7.14722900 | -1.65351400 | -3.31887000 |
| H  | -5.81496300 | -2.92421500 | -1.69125300 |
| H  | -6.68426700 | 0.01386100  | 1.32549900  |
| H  | -8.05067400 | 1.27991400  | -0.30130600 |
| C  | -5.30792800 | -2.23693300 | 0.96318700  |
| C  | -4.79567100 | -3.66160600 | 0.73941600  |

|    |             |             |             |
|----|-------------|-------------|-------------|
| H  | -5.00028900 | -4.29608200 | 1.60718500  |
| H  | -5.23652000 | -4.15249700 | -0.13462100 |
| Br | -8.70981400 | 0.90305500  | -3.20750600 |
| O  | -4.05834800 | 0.11516800  | 1.83479800  |
| C  | -4.03783700 | -0.00792000 | 3.23680300  |
| C  | -2.65262800 | -0.32291500 | 3.79780700  |
| H  | -4.75181800 | -0.78609300 | 3.55980800  |
| H  | -4.40112200 | 0.93689000  | 3.66708600  |
| H  | -2.66270600 | -0.35092600 | 4.89528300  |
| H  | -2.30917300 | -1.29830800 | 3.43088800  |
| H  | -1.94135000 | 0.43759900  | 3.46402600  |
| H  | -5.64293800 | -2.05369200 | 1.98503700  |
| C  | -2.08638100 | 0.02312500  | -2.99560600 |
| C  | -3.45104700 | 0.04506800  | -2.69605900 |
| C  | -3.88971600 | 0.58676600  | -1.48630800 |
| C  | -2.98039100 | 1.09342700  | -0.53722600 |
| C  | -1.61121700 | 1.04663100  | -0.85344400 |
| C  | -1.16776100 | 0.52873400  | -2.07145400 |
| H  | -1.74198100 | -0.37520400 | -3.94725200 |
| H  | -4.17677800 | -0.33542300 | -3.41027100 |
| H  | -4.95151300 | 0.65115500  | -1.28259600 |
| H  | -0.89317300 | 1.44332100  | -0.14535900 |
| H  | -0.10461500 | 0.52102900  | -2.29539900 |
| C  | -2.87547600 | 3.27839800  | 2.62168600  |
| C  | -5.17958100 | 3.24937500  | 1.72553400  |
| C  | -4.05625000 | 4.17717000  | 2.21795400  |
| H  | -3.12373300 | 2.73868200  | 3.54768800  |
| H  | -6.02442000 | 3.84294600  | 1.35490400  |
| B  | -3.49438300 | 1.82589500  | 0.77008200  |
| O  | -2.51733500 | 2.34701200  | 1.61514300  |
| O  | -4.74855600 | 2.41436100  | 0.66809000  |
| H  | -1.98977100 | 3.89243900  | 2.82998000  |
| H  | -5.54754400 | 2.63278200  | 2.56044200  |
| C  | -4.53622400 | 4.96779400  | 3.43927700  |

|   |             |            |            |
|---|-------------|------------|------------|
| H | -4.86158000 | 4.30068700 | 4.24701300 |
| H | -3.73619900 | 5.60700200 | 3.83193100 |
| H | -5.38029100 | 5.61672100 | 3.17721100 |
| C | -3.63333500 | 5.13384000 | 1.09255100 |
| H | -4.47849500 | 5.75630200 | 0.77560800 |
| H | -2.83124100 | 5.79946900 | 1.43337200 |
| H | -3.27268300 | 4.58428000 | 0.21932600 |

**im7f**

SCF Energy (a.u.) = -2642.355767

Thermal correction to Gibbs free energy (a.u.) = 0.908019

Charge = 0, Multiplicity = 1

|   |              |             |             |
|---|--------------|-------------|-------------|
| C | -9.25154500  | -0.09104600 | -0.45472200 |
| C | -10.29234600 | -0.96934400 | -0.11934900 |
| C | -11.50133500 | -0.49851600 | 0.37798700  |
| C | -11.71841700 | 0.87896400  | 0.56066500  |
| C | -10.67418300 | 1.75414500  | 0.22206100  |
| C | -9.46350800  | 1.27934000  | -0.27502100 |
| H | -10.14807600 | -2.03947400 | -0.25219900 |
| H | -12.28622700 | -1.20711100 | 0.62439300  |
| H | -10.81604800 | 2.82379000  | 0.35613200  |
| H | -8.66563500  | 1.97781200  | -0.51093700 |
| C | -12.97470900 | 1.43373500  | 1.08359600  |
| C | -14.07135900 | 0.75954300  | 1.45173500  |
| H | -12.98581000 | 2.52008000  | 1.17151900  |
| H | -14.94666600 | 1.27995600  | 1.82747800  |
| H | -14.14319200 | -0.32309400 | 1.39460800  |
| C | -6.99813700  | -1.00450400 | 0.26993700  |
| C | -7.92009400  | -0.62214600 | -0.92107000 |
| H | -8.06387000  | -1.51102200 | -1.54714200 |
| H | -7.41831000  | 0.13255000  | -1.53611700 |
| H | -7.57514500  | -1.68603300 | 0.90757500  |
| C | -5.72988700  | -1.72780400 | -0.14863400 |
| C | -5.07525900  | -2.54215200 | 0.78594100  |

|   |             |             |             |
|---|-------------|-------------|-------------|
| C | -5.13152800 | -1.55180100 | -1.39950500 |
| C | -3.84597300 | -3.12419200 | 0.49470700  |
| H | -5.52840900 | -2.69699500 | 1.76225300  |
| C | -3.89399300 | -2.12767100 | -1.68739100 |
| H | -5.61347500 | -0.93912300 | -2.15428700 |
| C | -3.22338100 | -2.90408400 | -0.74082200 |
| H | -3.34886200 | -3.73635300 | 1.24438400  |
| H | -3.42387800 | -1.93468000 | -2.64787600 |
| C | -6.17169900 | 2.56676500  | 2.58534200  |
| C | -7.17296800 | 1.68227500  | 2.98661700  |
| C | -7.41947800 | 0.52333700  | 2.24917500  |
| C | -6.67077900 | 0.22824400  | 1.10531500  |
| C | -5.66325600 | 1.11923100  | 0.71274800  |
| C | -5.41847300 | 2.28084500  | 1.44425600  |
| H | -5.97762300 | 3.47014300  | 3.15667300  |
| H | -7.76654200 | 1.89428900  | 3.87160900  |
| H | -8.21420500 | -0.15263100 | 2.55302400  |
| H | -5.05624600 | 0.89485000  | -0.15937700 |
| H | -4.63685400 | 2.96501300  | 1.12385900  |
| C | -0.80643900 | -2.41591100 | -0.25286300 |
| C | -1.80648500 | -3.35926600 | -0.98038400 |
| H | -1.65055000 | -4.38336000 | -0.61848300 |
| H | -1.59992000 | -3.35551200 | -2.05577000 |
| H | -1.06461900 | -2.45102700 | 0.81206600  |
| C | 0.64518100  | -2.84152400 | -0.37593200 |
| C | 1.53151900  | -2.53398700 | 0.65010700  |
| C | 1.15259900  | -3.48895400 | -1.52222500 |
| C | 2.91468100  | -2.78509400 | 0.53065500  |
| H | 1.16712800  | -2.05818900 | 1.55239200  |
| C | 2.50555700  | -3.75062700 | -1.65931800 |
| H | 0.47852300  | -3.77870600 | -2.32131500 |
| C | 3.41975900  | -3.39008300 | -0.64728300 |
| H | 3.55542900  | -2.62678900 | 1.39293300  |
| H | 2.87940600  | -4.23622600 | -2.55665900 |

|    |             |             |             |
|----|-------------|-------------|-------------|
| C  | -1.43527000 | 1.67235400  | -1.55148600 |
| C  | -2.01250000 | 1.20814900  | -0.36779600 |
| C  | -1.79710800 | -0.10560700 | 0.04734900  |
| C  | -0.99664300 | -0.97187500 | -0.70650100 |
| C  | -0.42422700 | -0.49748300 | -1.89112800 |
| C  | -0.64162700 | 0.81398500  | -2.31254500 |
| H  | -1.59009300 | 2.69901900  | -1.87047900 |
| H  | -2.62597200 | 1.86675400  | 0.23996100  |
| H  | -2.26794400 | -0.46721100 | 0.95706500  |
| H  | 0.22303500  | -1.14294200 | -2.47718600 |
| H  | -0.16653400 | 1.17201600  | -3.21952400 |
| Ni | 3.75591200  | -1.14492300 | -0.69684700 |
| C  | 7.80865000  | -0.08295300 | 1.88302300  |
| C  | 7.15891200  | -1.25226700 | 2.26194900  |
| C  | 6.40520900  | -1.94071200 | 1.31303500  |
| C  | 6.28805200  | -1.47846800 | -0.01035100 |
| C  | 6.97641200  | -0.29628300 | -0.35279100 |
| C  | 7.73139400  | 0.40443900  | 0.57989500  |
| H  | 7.23245700  | -1.62032200 | 3.27904700  |
| H  | 5.89082600  | -2.84376400 | 1.62469200  |
| H  | 6.87110300  | 0.10355300  | -1.35522100 |
| H  | 8.23441800  | 1.32319600  | 0.30202600  |
| C  | 5.40331000  | -2.10820800 | -1.01228300 |
| C  | 4.91753600  | -3.54666100 | -0.83507400 |
| H  | 5.12663600  | -4.14799700 | -1.72514100 |
| H  | 5.37777300  | -4.05683000 | 0.01743500  |
| Br | 8.84961800  | 0.90185700  | 3.21134100  |
| O  | 4.18591700  | 0.35222800  | -1.74133000 |
| C  | 4.34761000  | 0.30669700  | -3.15423400 |
| C  | 3.18554800  | -0.38331800 | -3.85831900 |
| H  | 5.29180900  | -0.21038500 | -3.37386300 |
| H  | 4.45667800  | 1.33715100  | -3.50807100 |
| H  | 3.34056000  | -0.39534500 | -4.94446500 |
| H  | 3.09033400  | -1.41933200 | -3.51094300 |

|   |            |             |             |
|---|------------|-------------|-------------|
| H | 2.25708800 | 0.14391600  | -3.62839900 |
| H | 5.69653700 | -1.87811600 | -2.03671600 |
| C | 2.15113400 | 0.13863100  | 2.93777600  |
| C | 3.51050900 | 0.18974600  | 2.61928300  |
| C | 3.91360400 | 0.62843100  | 1.35416700  |
| C | 2.97549500 | 1.00265800  | 0.36457700  |
| C | 1.61269600 | 0.92847200  | 0.71231500  |
| C | 1.20332300 | 0.51648700  | 1.98190200  |
| H | 1.83350400 | -0.18053000 | 3.92772400  |
| H | 4.25877700 | -0.08554300 | 3.35834800  |
| H | 4.97276400 | 0.73026800  | 1.14292100  |
| H | 0.87657100 | 1.22453800  | -0.02510900 |
| H | 0.14341500 | 0.48884900  | 2.22167700  |
| C | 2.26353000 | 3.10028200  | -2.67227000 |
| C | 4.42098700 | 3.78297800  | -1.71575400 |
| C | 2.99746000 | 4.27996900  | -2.01831000 |
| H | 2.70624100 | 2.91754100  | -3.66967500 |
| H | 4.99168700 | 4.56963900  | -1.20241500 |
| B | 3.44579500 | 1.60954600  | -1.07340100 |
| O | 2.30165700 | 1.93159600  | -1.89250800 |
| O | 4.43119500 | 2.64011600  | -0.89671200 |
| H | 1.20683500 | 3.35939700  | -2.83658300 |
| H | 4.93690800 | 3.58805800  | -2.67516300 |
| C | 3.05446700 | 5.45816800  | -2.99528800 |
| H | 3.56586000 | 5.18406700  | -3.92647800 |
| H | 2.04565800 | 5.80244200  | -3.25465300 |
| H | 3.59130200 | 6.30674200  | -2.55432200 |
| C | 2.28754800 | 4.69356100  | -0.72079300 |
| H | 2.82141200 | 5.51864100  | -0.23390300 |
| H | 1.26450100 | 5.02948300  | -0.93171000 |
| H | 2.23380600 | 3.86112400  | -0.01547600 |

**TS4f**

SCF Energy (a.u.) = -2642.331521

Thermal correction to Gibbs free energy (a.u.) = 0.908937

Charge = 0, Multiplicity = 1

|   |             |             |             |
|---|-------------|-------------|-------------|
| C | 9.22799000  | -0.30506400 | 0.32664700  |
| C | 10.25261000 | -0.96848800 | -0.36407800 |
| C | 11.43844400 | -0.32195200 | -0.69043000 |
| C | 11.64767100 | 1.02290000  | -0.33615500 |
| C | 10.61960200 | 1.68226800  | 0.35619800  |
| C | 9.43206900  | 1.03216500  | 0.68073800  |
| H | 10.11421800 | -2.00944600 | -0.64845800 |
| H | 12.21141100 | -0.86745600 | -1.22316500 |
| H | 10.75564700 | 2.72320700  | 0.63940000  |
| H | 8.64543700  | 1.57222200  | 1.20008700  |
| C | 12.87984900 | 1.75738800  | -0.65515900 |
| C | 13.95945800 | 1.29554800  | -1.29846100 |
| H | 12.88702600 | 2.79386800  | -0.31800300 |
| H | 14.81744200 | 1.93526700  | -1.47956400 |
| H | 14.03391900 | 0.27572700  | -1.66579100 |
| C | 6.94342200  | -0.90753000 | -0.59915800 |
| C | 7.91861100  | -0.99725200 | 0.60733100  |
| H | 8.08976600  | -2.05603600 | 0.83620600  |
| H | 7.44568800  | -0.54592500 | 1.48615500  |
| H | 7.48917100  | -1.28562900 | -1.47274700 |
| C | 5.69200900  | -1.75284200 | -0.43604600 |
| C | 4.99321900  | -2.15588400 | -1.58254000 |
| C | 5.15092200  | -2.07867700 | 0.81081600  |
| C | 3.77587300  | -2.82168000 | -1.48488600 |
| H | 5.40182400  | -1.91868600 | -2.56200400 |
| C | 3.92531500  | -2.73808600 | 0.90790300  |
| H | 5.66896600  | -1.79684600 | 1.72166800  |
| C | 3.20910700  | -3.10049800 | -0.23425300 |
| H | 3.24332400  | -3.10561800 | -2.39014700 |
| H | 3.50031800  | -2.93633300 | 1.88821400  |
| C | 6.03714700  | 3.26887500  | -1.33145500 |
| C | 7.00914800  | 2.61495700  | -2.08865300 |

|   |             |             |             |
|---|-------------|-------------|-------------|
| C | 7.28039000  | 1.26466100  | -1.86315300 |
| C | 6.58552500  | 0.54682200  | -0.88443200 |
| C | 5.60596600  | 1.20966100  | -0.13335000 |
| C | 5.33743000  | 2.56046500  | -0.35177500 |
| H | 5.82461100  | 4.32032300  | -1.50322700 |
| H | 7.56113300  | 3.15513200  | -2.85283700 |
| H | 8.05337200  | 0.76451600  | -2.44037300 |
| H | 5.03925300  | 0.66250300  | 0.61417500  |
| H | 4.57975500  | 3.06238000  | 0.24466900  |
| C | 0.78036100  | -2.48693500 | -0.41318100 |
| C | 1.79989600  | -3.62570100 | -0.12724900 |
| H | 1.62079200  | -4.44211900 | -0.83766000 |
| H | 1.63519100  | -4.02520300 | 0.87892100  |
| H | 0.98615300  | -2.13576700 | -1.43120800 |
| C | -0.67303000 | -2.92840500 | -0.37587000 |
| C | -1.60645100 | -2.26947100 | -1.17893400 |
| C | -1.14335300 | -3.93013600 | 0.48620000  |
| C | -2.97397500 | -2.56151100 | -1.09797800 |
| H | -1.27492000 | -1.49008600 | -1.85714500 |
| C | -2.50170400 | -4.22380300 | 0.57991700  |
| H | -0.44521600 | -4.48357400 | 1.10650300  |
| C | -3.44595900 | -3.53840100 | -0.19441800 |
| H | -3.65753700 | -2.07201700 | -1.78726900 |
| H | -2.84075100 | -4.98767500 | 1.27503700  |
| C | 1.49984500  | 0.89073800  | 2.21278300  |
| C | 1.99123800  | 0.89252400  | 0.90634000  |
| C | 1.75707300  | -0.19847600 | 0.06894700  |
| C | 1.02276600  | -1.30201800 | 0.51628500  |
| C | 0.54959000  | -1.30154200 | 1.83317300  |
| C | 0.78335700  | -0.21469100 | 2.67583000  |
| H | 1.67191700  | 1.74252900  | 2.86450500  |
| H | 2.55299000  | 1.74270300  | 0.53096600  |
| H | 2.15601600  | -0.19683600 | -0.94123000 |
| H | -0.03434200 | -2.14220400 | 2.19401800  |

|    |             |             |             |
|----|-------------|-------------|-------------|
| H  | 0.38996300  | -0.22396700 | 3.68811000  |
| Ni | -4.10995900 | -1.01036100 | 0.49361100  |
| C  | -7.63758200 | 0.40600200  | -1.79834700 |
| C  | -6.99631100 | -0.64676500 | -2.43982000 |
| C  | -6.34957000 | -1.61272300 | -1.67070700 |
| C  | -6.33132000 | -1.55083100 | -0.25788700 |
| C  | -7.02667300 | -0.47087700 | 0.34624400  |
| C  | -7.66979900 | 0.50160600  | -0.40743700 |
| H  | -6.98894600 | -0.71197800 | -3.52204200 |
| H  | -5.84736400 | -2.42543600 | -2.18467500 |
| H  | -7.01481600 | -0.38105800 | 1.42737300  |
| H  | -8.17037800 | 1.33071900  | 0.07891800  |
| C  | -5.49159400 | -2.42194900 | 0.58102400  |
| C  | -4.93393300 | -3.73167500 | 0.01691300  |
| H  | -5.09540600 | -4.55159700 | 0.72460000  |
| H  | -5.42817100 | -4.03016000 | -0.91660800 |
| Br | -8.51006500 | 1.79002700  | -2.87134700 |
| O  | -4.43308600 | -0.20729900 | 2.21779800  |
| C  | -4.14013000 | -0.90464800 | 3.44281100  |
| C  | -2.84231200 | -1.69288700 | 3.38861300  |
| H  | -4.99423500 | -1.56619700 | 3.61746300  |
| H  | -4.10950300 | -0.15743100 | 4.24175900  |
| H  | -2.69049400 | -2.22702200 | 4.33507800  |
| H  | -2.87169100 | -2.42716500 | 2.57695100  |
| H  | -2.00279700 | -1.01761400 | 3.21829600  |
| H  | -5.85487800 | -2.50839500 | 1.60603000  |
| C  | -1.89252700 | 1.85561100  | -2.34249700 |
| C  | -3.28677300 | 1.76950400  | -2.27716800 |
| C  | -3.89459600 | 1.19431700  | -1.15895200 |
| C  | -3.13543900 | 0.65675100  | -0.09470500 |
| C  | -1.73689800 | 0.76919800  | -0.18689800 |
| C  | -1.11778700 | 1.36594200  | -1.28819900 |
| H  | -1.41460600 | 2.31766200  | -3.20289200 |
| H  | -3.89738900 | 2.16602100  | -3.08505800 |

|   |             |            |             |
|---|-------------|------------|-------------|
| H | -4.98039400 | 1.17739100 | -1.10639600 |
| H | -1.12225300 | 0.38479200 | 0.61904100  |
| H | -0.03491200 | 1.44413000 | -1.32154700 |
| C | -1.96701800 | 2.55197900 | 2.60002700  |
| C | -4.33676600 | 3.32457100 | 2.38621100  |
| C | -2.87266600 | 3.74024500 | 2.17203500  |
| H | -1.59281300 | 2.71461900 | 3.61804600  |
| H | -5.00568400 | 4.10832700 | 2.01434600  |
| B | -3.78198600 | 1.06469300 | 1.90611400  |
| O | -2.61310700 | 1.28263500 | 2.62501600  |
| O | -4.66865800 | 2.12545200 | 1.69894000  |
| H | -1.09785300 | 2.48383500 | 1.93386700  |
| H | -4.53132200 | 3.20226100 | 3.46393500  |
| C | -2.55667500 | 4.95431400 | 3.05832400  |
| H | -2.74736300 | 4.73981900 | 4.11693000  |
| H | -1.50379800 | 5.24472100 | 2.95813000  |
| H | -3.16590100 | 5.81936200 | 2.77094300  |
| C | -2.64914900 | 4.11478000 | 0.69820700  |
| H | -3.25624800 | 4.98914700 | 0.43310400  |
| H | -1.59773500 | 4.36726100 | 0.51807800  |
| H | -2.92122700 | 3.30007000 | 0.02823400  |

**im8f**

SCF Energy (a.u.) = -2642.364127

Thermal correction to Gibbs free energy (a.u.) = 0.907914

Charge = 0, Multiplicity = 1

|   |             |             |             |
|---|-------------|-------------|-------------|
| C | 9.48178400  | 0.60457800  | 0.93232000  |
| C | 10.56771500 | -0.23060200 | 1.23316800  |
| C | 11.86289500 | 0.10778500  | 0.86084300  |
| C | 12.12493800 | 1.30352400  | 0.16836100  |
| C | 11.03496700 | 2.13680100  | -0.12933800 |
| C | 9.73817200  | 1.79434800  | 0.24392300  |
| H | 10.38995900 | -1.16084600 | 1.76858000  |
| H | 12.67988900 | -0.56150000 | 1.11280500  |

|   |             |             |             |
|---|-------------|-------------|-------------|
| H | 11.21058800 | 3.06578700  | -0.66639500 |
| H | 8.91085600  | 2.44852800  | -0.01631700 |
| C | 13.47266500 | 1.71253600  | -0.25086100 |
| C | 14.62203000 | 1.05540800  | -0.05111100 |
| H | 13.51016500 | 2.66285000  | -0.78335600 |
| H | 15.56441100 | 1.45732200  | -0.40968800 |
| H | 14.67254100 | 0.10385700  | 0.47092300  |
| C | 7.45752400  | -0.73935600 | 0.19400800  |
| C | 8.07511300  | 0.18792800  | 1.27798200  |
| H | 8.06216600  | -0.34450600 | 2.23667300  |
| H | 7.44570200  | 1.07728300  | 1.39008500  |
| H | 8.16591900  | -1.56438200 | 0.04661800  |
| C | 6.12501900  | -1.34443300 | 0.60109000  |
| C | 5.70357200  | -2.53171100 | -0.01308400 |
| C | 5.25579700  | -0.73060100 | 1.50740800  |
| C | 4.44316100  | -3.06315100 | 0.23955800  |
| H | 6.36798500  | -3.02851800 | -0.71621000 |
| C | 3.98885300  | -1.25968600 | 1.75392600  |
| H | 5.55046600  | 0.18265300  | 2.01395200  |
| C | 3.55420400  | -2.41941500 | 1.10998100  |
| H | 4.13322400  | -3.97597700 | -0.26486500 |
| H | 3.31379700  | -0.73960500 | 2.42775900  |
| C | 7.23041200  | 1.47197800  | -3.52823500 |
| C | 8.30182000  | 0.61299500  | -3.28219100 |
| C | 8.35622500  | -0.11391900 | -2.09228400 |
| C | 7.34394400  | 0.00153400  | -1.13357700 |
| C | 6.26730400  | 0.85946200  | -1.39277400 |
| C | 6.21367600  | 1.59217700  | -2.57819800 |
| H | 7.18567300  | 2.04076600  | -4.45281500 |
| H | 9.09893500  | 0.51031100  | -4.01336500 |
| H | 9.20295200  | -0.76579500 | -1.89494300 |
| H | 5.45755300  | 0.94117000  | -0.67413900 |
| H | 5.37386900  | 2.25763900  | -2.76065000 |
| C | 1.30981800  | -2.47602100 | -0.03075700 |

|    |             |             |             |
|----|-------------|-------------|-------------|
| C  | 2.12415800  | -2.88285300 | 1.22976100  |
| H  | 2.08140300  | -3.97231100 | 1.34557100  |
| H  | 1.65818300  | -2.44240700 | 2.11886300  |
| H  | 1.74131400  | -3.04278900 | -0.86760100 |
| C  | -0.16960500 | -2.84360800 | 0.03977000  |
| C  | -1.04231300 | -2.34003800 | -0.93525200 |
| C  | -0.70578300 | -3.70060300 | 1.00722100  |
| C  | -2.39031200 | -2.68664700 | -0.94953300 |
| H  | -0.66180200 | -1.66093500 | -1.69188600 |
| C  | -2.06148900 | -4.04200600 | 0.99732500  |
| H  | -0.07056100 | -4.11590600 | 1.78240400  |
| C  | -2.93019000 | -3.54847900 | 0.01992200  |
| H  | -3.01864200 | -2.29100500 | -1.74022100 |
| H  | -2.44593900 | -4.71758800 | 1.75847100  |
| C  | 2.05975100  | 1.71202500  | -0.85141500 |
| C  | 2.60104400  | 0.72517500  | -1.67552100 |
| C  | 2.33637900  | -0.62157000 | -1.42055600 |
| C  | 1.52950700  | -1.00360100 | -0.34561800 |
| C  | 0.99042200  | -0.00506300 | 0.47469900  |
| C  | 1.25113700  | 1.34131700  | 0.22653200  |
| H  | 2.26236600  | 2.76133400  | -1.04701000 |
| H  | 3.23545000  | 0.99667200  | -2.51380100 |
| H  | 2.77881200  | -1.38607300 | -2.05307900 |
| H  | 0.36584900  | -0.28418100 | 1.31590300  |
| H  | 0.81601400  | 2.10111000  | 0.86965700  |
| Ni | -4.55048000 | -0.94792200 | 0.13781000  |
| C  | -7.69506800 | -0.23921400 | -1.83907600 |
| C  | -6.60547300 | -0.84728300 | -2.40971200 |
| C  | -5.84207700 | -1.75719700 | -1.64216500 |
| C  | -6.22525700 | -2.10096600 | -0.29857600 |
| C  | -7.36567400 | -1.40505100 | 0.24031300  |
| C  | -8.08677000 | -0.50805800 | -0.50824000 |
| H  | -6.31113800 | -0.62554700 | -3.42868400 |
| H  | -5.07539300 | -2.33145000 | -2.14968400 |

|    |             |             |             |
|----|-------------|-------------|-------------|
| H  | -7.65731900 | -1.61219500 | 1.26569400  |
| H  | -8.94600000 | -0.00150500 | -0.08332200 |
| C  | -5.33742600 | -2.84023000 | 0.53627500  |
| C  | -4.40401700 | -3.92353800 | 0.00084900  |
| H  | -4.54081000 | -4.83637000 | 0.59364200  |
| H  | -4.68714100 | -4.18629600 | -1.02657600 |
| Br | -8.73081100 | 1.06271800  | -2.86792200 |
| O  | -4.24315400 | -0.49097300 | 2.20440900  |
| C  | -3.27939900 | -1.21897600 | 2.99723700  |
| C  | -1.86374800 | -0.85449300 | 2.60140000  |
| H  | -3.48131300 | -2.27399800 | 2.80446600  |
| H  | -3.47160100 | -1.00011600 | 4.05117900  |
| H  | -1.14738800 | -1.44909500 | 3.17904700  |
| H  | -1.70772000 | -1.06986400 | 1.54352300  |
| H  | -1.67693800 | 0.20712700  | 2.78480400  |
| H  | -5.65905300 | -2.97053300 | 1.56829500  |
| C  | -2.90853700 | 3.10291200  | -1.77821400 |
| C  | -4.28432700 | 2.86594800  | -1.70319200 |
| C  | -4.76245300 | 1.68521300  | -1.12945700 |
| C  | -3.89858800 | 0.69881900  | -0.61725200 |
| C  | -2.51911500 | 0.97027700  | -0.69877000 |
| C  | -2.02558900 | 2.14996500  | -1.27023100 |
| H  | -2.53171100 | 4.01860800  | -2.22764400 |
| H  | -4.98540600 | 3.60088200  | -2.09492000 |
| H  | -5.83756500 | 1.52719000  | -1.08741400 |
| H  | -1.79801800 | 0.25042400  | -0.31928100 |
| H  | -0.95134800 | 2.31214500  | -1.32094400 |
| C  | -4.33165000 | 2.73662500  | 3.93028300  |
| C  | -5.94441700 | 2.74043200  | 2.05165100  |
| C  | -4.79565300 | 3.53096700  | 2.70198800  |
| H  | -5.13965100 | 2.66423800  | 4.67135000  |
| H  | -6.14267000 | 3.11535200  | 1.04296000  |
| B  | -4.60581300 | 0.79787600  | 2.57136000  |
| O  | -3.91197400 | 1.41420800  | 3.57325900  |

|   |             |            |            |
|---|-------------|------------|------------|
| O | -5.66344500 | 1.34386000 | 1.92428000 |
| H | -3.47511100 | 3.22366200 | 4.40668900 |
| H | -6.86084600 | 2.84160300 | 2.64705000 |
| C | -5.32418000 | 4.89849200 | 3.15298800 |
| H | -6.12838300 | 4.79958700 | 3.89214800 |
| H | -4.52203000 | 5.49638800 | 3.60042000 |
| H | -5.71755900 | 5.46009600 | 2.29816900 |
| C | -3.62873800 | 3.71307400 | 1.71724000 |
| H | -3.94018600 | 4.31591200 | 0.86005100 |
| H | -2.79200700 | 4.22244800 | 2.21037500 |
| H | -3.26227000 | 2.76531400 | 1.31589800 |

**im9f**

SCF Energy (a.u.) = -2427.933853

Thermal correction to Gibbs free energy (a.u.) = 0.868540

Charge = 0, Multiplicity = 1

|   |             |             |             |
|---|-------------|-------------|-------------|
| C | 8.54058900  | -0.83847800 | 1.24474900  |
| C | 9.64694200  | -1.53769800 | 0.74038200  |
| C | 10.93256300 | -1.01924800 | 0.83541700  |
| C | 11.16406100 | 0.22767800  | 1.44332700  |
| C | 10.05376900 | 0.92315000  | 1.94787200  |
| C | 8.76667800  | 0.40156400  | 1.85006400  |
| H | 9.49286000  | -2.50443500 | 0.26574800  |
| H | 11.76590500 | -1.58929000 | 0.43600800  |
| H | 10.20563000 | 1.89080400  | 2.42000300  |
| H | 7.92318900  | 0.97007800  | 2.23142200  |
| C | 12.50034100 | 0.82542100  | 1.57132900  |
| C | 13.66586600 | 0.30997300  | 1.16062400  |
| H | 12.51339400 | 1.79969900  | 2.05991100  |
| H | 14.59720400 | 0.84729400  | 1.30934200  |
| H | 13.74085300 | -0.65500500 | 0.66694800  |
| C | 6.54745400  | -1.00862500 | -0.31893600 |
| C | 7.14505900  | -1.37951000 | 1.06706100  |
| H | 7.14683300  | -2.47210400 | 1.16168900  |

|   |             |             |             |
|---|-------------|-------------|-------------|
| H | 6.49494800  | -0.98478400 | 1.85520700  |
| H | 7.27401300  | -1.33857400 | -1.07228100 |
| C | 5.22782700  | -1.69933300 | -0.61666400 |
| C | 4.82639500  | -1.84508300 | -1.95171600 |
| C | 4.34712800  | -2.12182300 | 0.38299100  |
| C | 3.57219900  | -2.35324700 | -2.27348100 |
| H | 5.50034400  | -1.52844300 | -2.74436700 |
| C | 3.08647200  | -2.62418900 | 0.05939100  |
| H | 4.62628500  | -2.03816900 | 1.42828900  |
| C | 2.66969200  | -2.72733100 | -1.26918300 |
| H | 3.27619600  | -2.43547600 | -3.31716000 |
| H | 2.40035100  | -2.90056500 | 0.85533500  |
| C | 6.26068500  | 3.30989500  | -0.58047200 |
| C | 7.35254400  | 2.64068600  | -1.13373900 |
| C | 7.42713100  | 1.24882700  | -1.06625000 |
| C | 6.41509900  | 0.50469500  | -0.45065100 |
| C | 5.31812400  | 1.18437900  | 0.09495200  |
| C | 5.24410300  | 2.57561500  | 0.03455700  |
| H | 6.19962700  | 4.39347000  | -0.63046300 |
| H | 8.14972600  | 3.20036100  | -1.61527400 |
| H | 8.28921400  | 0.73268900  | -1.48011000 |
| H | 4.50916400  | 0.62251600  | 0.55220000  |
| H | 4.38880200  | 3.08786300  | 0.46757500  |
| C | 0.45109100  | -1.77413000 | -1.94206000 |
| C | 1.23955900  | -3.06853100 | -1.60518200 |
| H | 1.17742100  | -3.74844200 | -2.46347300 |
| H | 0.77389900  | -3.57582700 | -0.75419800 |
| H | 0.93031500  | -1.33517500 | -2.82542200 |
| C | -1.01922600 | -1.97566400 | -2.25614600 |
| C | -1.65561300 | -1.05778900 | -3.10188600 |
| C | -1.81326900 | -2.91647700 | -1.59405700 |
| C | -3.04222000 | -0.99678200 | -3.17082400 |
| H | -1.05639400 | -0.33617200 | -3.65218600 |
| C | -3.20533700 | -2.84605300 | -1.65433100 |

|    |             |             |             |
|----|-------------|-------------|-------------|
| H  | -1.35953600 | -3.67578500 | -0.96490000 |
| C  | -3.84049000 | -1.83700100 | -2.38092700 |
| H  | -3.51422100 | -0.23029700 | -3.78017700 |
| H  | -3.79638900 | -3.54215700 | -1.07122100 |
| C  | 0.87570000  | 1.10932300  | 1.27998400  |
| C  | 1.54969500  | 1.29539000  | 0.07237200  |
| C  | 1.40540800  | 0.36773900  | -0.96154200 |
| C  | 0.58178600  | -0.75165500 | -0.81322200 |
| C  | -0.09574700 | -0.92706500 | 0.40126600  |
| C  | 0.05323100  | -0.00968000 | 1.44082500  |
| H  | 0.98512300  | 1.82995800  | 2.08537700  |
| H  | 2.19026600  | 2.16041900  | -0.07086400 |
| H  | 1.95166500  | 0.50865000  | -1.88982300 |
| H  | -0.75938200 | -1.77661400 | 0.52766200  |
| H  | -0.48033600 | -0.16433500 | 2.37537400  |
| Ni | -5.90577800 | -0.27922200 | 0.61677100  |
| C  | -2.93644700 | 3.00342800  | -0.97984200 |
| C  | -2.51879700 | 1.74441600  | -0.55785100 |
| C  | -3.38912300 | 0.66881700  | -0.70726200 |
| C  | -4.67706900 | 0.81699400  | -1.27120200 |
| C  | -5.03103200 | 2.10566400  | -1.71549300 |
| C  | -4.17922200 | 3.20249400  | -1.57023800 |
| H  | -1.53623500 | 1.59479900  | -0.12666700 |
| H  | -3.05995900 | -0.30951300 | -0.38840000 |
| H  | -5.99331400 | 2.25492300  | -2.19892100 |
| H  | -4.47775500 | 4.18542000  | -1.91755200 |
| C  | -5.65538900 | -0.31933000 | -1.32763300 |
| C  | -5.31113700 | -1.54380200 | -2.22550200 |
| H  | -5.83657500 | -2.42565700 | -1.84746900 |
| H  | -5.73021300 | -1.33238500 | -3.22059400 |
| Br | -1.72872500 | 4.53156300  | -0.75124200 |
| H  | -6.61844100 | 0.06036800  | -1.69121800 |
| C  | -3.89872300 | -4.41525000 | 1.65520800  |
| C  | -3.16018700 | -3.24388900 | 1.83256400  |

|   |             |             |             |
|---|-------------|-------------|-------------|
| C | -3.69966300 | -2.00853200 | 1.46384400  |
| C | -4.97977300 | -1.90099100 | 0.89566900  |
| C | -5.70598800 | -3.09364700 | 0.72851100  |
| C | -5.18143500 | -4.33348900 | 1.10822500  |
| H | -3.48230600 | -5.37761700 | 1.93999600  |
| H | -2.15897200 | -3.28977900 | 2.25639600  |
| H | -3.08944900 | -1.11975300 | 1.60863600  |
| H | -6.69887500 | -3.06230300 | 0.28298000  |
| H | -5.77123100 | -5.23656600 | 0.96692100  |
| C | -6.11975300 | -0.08119500 | 2.96319800  |
| C | -5.26306100 | 0.84319700  | 2.44292200  |
| C | -5.54003400 | 2.28376400  | 2.07625800  |
| C | -6.96144300 | 2.56710500  | 1.53534900  |
| C | -7.41578000 | 1.54541600  | 0.51592900  |
| C | -8.03067000 | 0.34561400  | 0.73638000  |
| C | -8.47697700 | -0.25008200 | 2.05388900  |
| C | -7.58794100 | 0.10291300  | 3.26750900  |
| H | -5.69438900 | -1.04025200 | 3.24326900  |
| H | -4.21190400 | 0.56618100  | 2.40084800  |
| H | -4.81192100 | 2.57470300  | 1.31195600  |
| H | -5.34323200 | 2.92787500  | 2.94674500  |
| H | -7.67822300 | 2.64110100  | 2.35666600  |
| H | -6.94590100 | 3.55108400  | 1.05485700  |
| H | -7.31162100 | 1.84974000  | -0.51864600 |
| H | -8.40802200 | -0.17916600 | -0.14011700 |
| H | -8.49614400 | -1.33999200 | 1.93864000  |
| H | -9.51491900 | 0.05500900  | 2.25729800  |
| H | -7.79206900 | 1.12023400  | 3.60762300  |
| H | -7.86202400 | -0.55844500 | 4.09649700  |

### TS5f

SCF Energy (a.u.) = -2427.907304

Thermal correction to Gibbs free energy (a.u.) = 0.866620

Charge = 0, Multiplicity = 1

|   |              |             |             |
|---|--------------|-------------|-------------|
| C | -8.51124900  | -0.76765400 | -1.36730100 |
| C | -9.63477200  | -1.48692300 | -0.93427000 |
| C | -10.90875800 | -0.93467000 | -0.98613000 |
| C | -11.11063900 | 0.36779400  | -1.47685100 |
| C | -9.98314000  | 1.08330000  | -1.91021200 |
| C | -8.70778000  | 0.52769300  | -1.85585100 |
| H | -9.50376600  | -2.49665000 | -0.55100400 |
| H | -11.75621700 | -1.52150500 | -0.64505800 |
| H | -10.11206400 | 2.09340200  | -2.29147900 |
| H | -7.85047600  | 1.11107000  | -2.17966100 |
| C | -12.43349700 | 1.00294100  | -1.55465500 |
| C | -13.61160500 | 0.47687600  | -1.19678500 |
| H | -12.42366200 | 2.01770700  | -1.95240600 |
| H | -14.53083200 | 1.04494900  | -1.29931800 |
| H | -13.70919200 | -0.52720900 | -0.79329800 |
| C | -6.52988700  | -1.12564800 | 0.17993200  |
| C | -7.12825200  | -1.35261100 | -1.23630000 |
| H | -7.15229800  | -2.43125400 | -1.43305200 |
| H | -6.46623600  | -0.89960100 | -1.98206800 |
| H | -7.26495800  | -1.51219200 | 0.89719500  |
| C | -5.22377700  | -1.86518600 | 0.41366300  |
| C | -4.82774000  | -2.14141900 | 1.72968100  |
| C | -4.34934200  | -2.21045300 | -0.62048800 |
| C | -3.58358300  | -2.69979400 | 2.00352100  |
| H | -5.49740700  | -1.88744300 | 2.54802500  |
| C | -3.09850600  | -2.76320200 | -0.34447200 |
| H | -4.62517500  | -2.02669400 | -1.65370800 |
| C | -2.68605500  | -2.99504300 | 0.96895700  |
| H | -3.29162800  | -2.88356600 | 3.03535000  |
| H | -2.41675900  | -2.97840200 | -1.16275200 |
| C | -6.16909500  | 3.14313800  | 0.84819300  |
| C | -7.27203200  | 2.44318900  | 1.33778200  |
| C | -7.37020000  | 1.06538700  | 1.13937200  |
| C | -6.37095300  | 0.36572500  | 0.45468300  |

|    |             |             |             |
|----|-------------|-------------|-------------|
| C  | -5.26264000 | 1.07521500  | -0.02616800 |
| C  | -5.16519200 | 2.45317300  | 0.16484900  |
| H  | -6.08993400 | 4.21603400  | 0.99964600  |
| H  | -8.05968800 | 2.96831100  | 1.87106100  |
| H  | -8.24111400 | 0.52717300  | 1.50361000  |
| H  | -4.46362300 | 0.54578000  | -0.53652000 |
| H  | -4.30189800 | 2.98959900  | -0.22030700 |
| C  | -0.46415700 | -2.14224200 | 1.74531500  |
| C  | -1.26100200 | -3.38674600 | 1.27186300  |
| H  | -1.20905800 | -4.15449200 | 2.05343900  |
| H  | -0.79855200 | -3.80638300 | 0.37254000  |
| H  | -0.93811400 | -1.80003800 | 2.67300000  |
| C  | 1.00755500  | -2.37644800 | 2.03173800  |
| C  | 1.65209100  | -1.51827800 | 2.93195300  |
| C  | 1.79379700  | -3.28292000 | 1.31318500  |
| C  | 3.03845900  | -1.46354900 | 2.99551600  |
| H  | 1.05880200  | -0.83050400 | 3.52944300  |
| C  | 3.18809100  | -3.22609400 | 1.37768900  |
| H  | 1.32782200  | -4.01060300 | 0.65556300  |
| C  | 3.83049200  | -2.25518100 | 2.15104600  |
| H  | 3.51516200  | -0.73535700 | 3.64615800  |
| H  | 3.78116300  | -3.89957300 | 0.76931000  |
| C  | -0.86792100 | 1.08927900  | -1.13000900 |
| C  | -1.51631700 | 1.15697000  | 0.10376400  |
| C  | -1.37981200 | 0.11691700  | 1.02576000  |
| C  | -0.59004000 | -0.99943900 | 0.73755500  |
| C  | 0.06063000  | -1.05600700 | -0.50244800 |
| C  | -0.07956900 | -0.02536700 | -1.43133400 |
| H  | -0.97032600 | 1.89770300  | -1.84810800 |
| H  | -2.13103900 | 2.01604300  | 0.35432400  |
| H  | -1.90605600 | 0.16753200  | 1.97458500  |
| H  | 0.69068100  | -1.90881300 | -0.73812100 |
| H  | 0.43270600  | -0.08806700 | -2.38794000 |
| Ni | 5.38547400  | 0.27050500  | -0.74145200 |

|    |            |             |             |
|----|------------|-------------|-------------|
| C  | 2.84686100 | 2.59333700  | 1.45184500  |
| C  | 2.44806200 | 1.45013400  | 0.77958800  |
| C  | 3.34423400 | 0.37809200  | 0.68337500  |
| C  | 4.64678700 | 0.45418900  | 1.24537500  |
| C  | 4.99384500 | 1.64259200  | 1.93177800  |
| C  | 4.10770200 | 2.70542900  | 2.04594300  |
| H  | 1.45665400 | 1.36708500  | 0.35236300  |
| H  | 2.99208500 | -0.54794700 | 0.24803600  |
| H  | 5.98064200 | 1.72037600  | 2.38151600  |
| H  | 4.38837300 | 3.60641600  | 2.57975000  |
| C  | 5.60427300 | -0.67861300 | 1.11465700  |
| C  | 5.29479200 | -1.94052900 | 1.99248200  |
| H  | 5.85038400 | -2.79837900 | 1.60568800  |
| H  | 5.71260900 | -1.70381000 | 2.98110600  |
| Br | 1.59658500 | 4.09527100  | 1.59563100  |
| H  | 6.61733100 | -0.35883500 | 1.37100200  |
| C  | 6.54360700 | -4.07850400 | -1.84603800 |
| C  | 5.20190400 | -3.69258500 | -1.75459300 |
| C  | 4.85039400 | -2.48281400 | -1.15790100 |
| C  | 5.83131300 | -1.60043400 | -0.65466200 |
| C  | 7.17408100 | -2.02333700 | -0.72872900 |
| C  | 7.52709100 | -3.23404700 | -1.32794900 |
| H  | 6.81471900 | -5.02332200 | -2.30803800 |
| H  | 4.42284500 | -4.33703500 | -2.15647800 |
| H  | 3.80264200 | -2.20314700 | -1.11202900 |
| H  | 7.95576500 | -1.38898900 | -0.31780000 |
| H  | 8.57512500 | -3.51899400 | -1.38512500 |
| C  | 5.34966300 | 0.32661100  | -2.86415400 |
| C  | 4.33315700 | 1.09795300  | -2.32845100 |
| C  | 4.30349900 | 2.60112200  | -2.14723400 |
| C  | 5.67211300 | 3.27139800  | -1.86982400 |
| C  | 6.49342800 | 2.53663700  | -0.83811900 |
| C  | 7.39139800 | 1.54827600  | -1.07457200 |
| C  | 7.80340400 | 0.99438200  | -2.42110400 |

|   |            |             |             |
|---|------------|-------------|-------------|
| C | 6.65652300 | 0.83663400  | -3.44912300 |
| H | 5.09794500 | -0.69735400 | -3.12224500 |
| H | 3.35552800 | 0.62520200  | -2.23398200 |
| H | 3.63307100 | 2.82081300  | -1.30801700 |
| H | 3.84673000 | 3.07427600  | -3.03155300 |
| H | 6.23616800 | 3.37673500  | -2.79955300 |
| H | 5.48149000 | 4.28998000  | -1.51269600 |
| H | 6.36708500 | 2.86920500  | 0.18669000  |
| H | 7.97031800 | 1.18543600  | -0.22484600 |
| H | 8.25123500 | 0.01054500  | -2.25393400 |
| H | 8.59411800 | 1.62303700  | -2.85924700 |
| H | 6.48667400 | 1.78249100  | -3.97158500 |
| H | 6.99005900 | 0.12874900  | -4.21590600 |

### **im10f**

SCF Energy (a.u.) = -2427.969605

Thermal correction to Gibbs free energy (a.u.) = 0.871181

Charge = 0, Multiplicity = 1

|   |             |             |             |
|---|-------------|-------------|-------------|
| C | 8.30534800  | -0.40810100 | 1.43304600  |
| C | 9.46251300  | -1.12880700 | 1.10322800  |
| C | 10.70727800 | -0.51309200 | 1.05742800  |
| C | 10.84476800 | 0.85730300  | 1.34221900  |
| C | 9.68387100  | 1.57410300  | 1.67313200  |
| C | 8.43786600  | 0.95459700  | 1.71695200  |
| H | 9.38132300  | -2.19029100 | 0.87899400  |
| H | 11.58217500 | -1.10253700 | 0.80049300  |
| H | 9.76283600  | 2.63568300  | 1.89472300  |
| H | 7.55313500  | 1.53765300  | 1.95663300  |
| C | 12.13421500 | 1.56129300  | 1.30881400  |
| C | 13.33679800 | 1.04488100  | 1.02618400  |
| H | 12.07401200 | 2.62372500  | 1.54476000  |
| H | 14.22647400 | 1.66669700  | 1.03109100  |
| H | 13.48419400 | -0.00363300 | 0.78242700  |
| C | 6.34454700  | -1.09859100 | -0.02432700 |

|   |             |             |             |
|---|-------------|-------------|-------------|
| C | 6.95321400  | -1.07361400 | 1.40519500  |
| H | 7.03162100  | -2.10621000 | 1.76640700  |
| H | 6.26906900  | -0.54385700 | 2.07682000  |
| H | 7.09824700  | -1.55461900 | -0.67883300 |
| C | 5.07595900  | -1.92719600 | -0.13216000 |
| C | 4.67884200  | -2.39360900 | -1.39313900 |
| C | 4.23151700  | -2.17268800 | 0.95383900  |
| C | 3.45947600  | -3.03866600 | -1.56916000 |
| H | 5.32554000  | -2.21839400 | -2.24967800 |
| C | 3.00492400  | -2.81338500 | 0.77507900  |
| H | 4.50969700  | -1.84028000 | 1.94854100  |
| C | 2.58840500  | -3.23397200 | -0.48915100 |
| H | 3.16404100  | -3.36918700 | -2.56269700 |
| H | 2.34348300  | -2.94866000 | 1.62642900  |
| C | 5.76190100  | 2.98905600  | -1.34759800 |
| C | 6.90561300  | 2.28301300  | -1.72124100 |
| C | 7.07623500  | 0.96032600  | -1.31056200 |
| C | 6.10995300  | 0.32230600  | -0.52564200 |
| C | 4.96076600  | 1.03634000  | -0.16136400 |
| C | 4.79059100  | 2.36009400  | -0.56547900 |
| H | 5.62584700  | 4.01902400  | -1.66534300 |
| H | 7.66837100  | 2.76099100  | -2.32975700 |
| H | 7.97784400  | 0.42019200  | -1.58658900 |
| H | 4.18691400  | 0.54987800  | 0.42501000  |
| H | 3.89556500  | 2.90149900  | -0.27036800 |
| C | 0.32733000  | -2.57710400 | -1.32880000 |
| C | 1.17823900  | -3.71997000 | -0.71611900 |
| H | 1.15084800  | -4.58113500 | -1.39486100 |
| H | 0.74330300  | -4.04207500 | 0.23581800  |
| H | 0.78509700  | -2.32746000 | -2.29328200 |
| C | -1.13310700 | -2.90557700 | -1.57936500 |
| C | -1.81477000 | -2.16895000 | -2.55614300 |
| C | -1.87698000 | -3.77685900 | -0.77700500 |
| C | -3.20089500 | -2.19008300 | -2.62952200 |

|    |             |             |             |
|----|-------------|-------------|-------------|
| H  | -1.25447700 | -1.50916600 | -3.21359400 |
| C  | -3.27234100 | -3.79593500 | -0.85238200 |
| H  | -1.37920100 | -4.41609500 | -0.05399500 |
| C  | -3.95831500 | -2.93704100 | -1.71666300 |
| H  | -3.70552200 | -1.54604100 | -3.34286900 |
| H  | -3.83413100 | -4.44673000 | -0.18708200 |
| C  | 0.56664000  | 0.99534100  | 1.12995800  |
| C  | 1.17643200  | 0.96080400  | -0.12464800 |
| C  | 1.09812400  | -0.19080600 | -0.91111400 |
| C  | 0.40186900  | -1.31781300 | -0.46608200 |
| C  | -0.21152200 | -1.27157500 | 0.79276700  |
| C  | -0.12434600 | -0.13024800 | 1.58877900  |
| H  | 0.62357000  | 1.88980200  | 1.74346300  |
| H  | 1.71221500  | 1.82773600  | -0.49877300 |
| H  | 1.59152300  | -0.21519600 | -1.87834800 |
| H  | -0.77209300 | -2.13182000 | 1.14730700  |
| H  | -0.60098000 | -0.11571000 | 2.56527900  |
| Ni | -4.94990000 | 0.89037700  | 0.69310500  |
| C  | -2.98085300 | 1.57783000  | -2.06823200 |
| C  | -2.64578400 | 0.81744300  | -0.98088600 |
| C  | -3.59495000 | -0.10462700 | -0.44194000 |
| C  | -4.89539000 | -0.20014600 | -1.05595800 |
| C  | -5.13809800 | 0.55431700  | -2.24611600 |
| C  | -4.21731500 | 1.44667200  | -2.74531700 |
| H  | -1.65926200 | 0.87906400  | -0.53892300 |
| H  | -3.19261800 | -0.90866100 | 0.16184100  |
| H  | -6.08697300 | 0.42101800  | -2.76253100 |
| H  | -4.42428200 | 2.03455600  | -3.63213300 |
| C  | -5.80867900 | -1.38913000 | -0.75912400 |
| C  | -5.43834800 | -2.67867700 | -1.59216600 |
| H  | -5.95485200 | -3.53570700 | -1.14520800 |
| H  | -5.86095600 | -2.53228300 | -2.59302200 |
| Br | -1.67364100 | 2.87108500  | -2.76692400 |
| H  | -6.80655300 | -1.10429800 | -1.11304700 |

|   |             |             |             |
|---|-------------|-------------|-------------|
| C | -6.37201700 | -1.95949500 | 3.51962000  |
| C | -5.20009100 | -2.41840400 | 2.91365200  |
| C | -4.99639000 | -2.24343900 | 1.54558400  |
| C | -5.96085300 | -1.60840200 | 0.74350900  |
| C | -7.13335100 | -1.15550900 | 1.37072100  |
| C | -7.33964700 | -1.32632200 | 2.74102200  |
| H | -6.52964300 | -2.09868900 | 4.58531600  |
| H | -4.43834000 | -2.91556900 | 3.50821400  |
| H | -4.08133800 | -2.60754500 | 1.09869500  |
| H | -7.89533100 | -0.66699700 | 0.77015800  |
| H | -8.26019100 | -0.97052600 | 3.19501600  |
| C | -4.70122400 | 1.26735800  | 2.74661000  |
| C | -3.57170300 | 1.69617000  | 2.08049600  |
| C | -3.33697500 | 3.09044400  | 1.54256700  |
| C | -4.60891200 | 3.76972400  | 0.96109100  |
| C | -5.54151000 | 2.80897400  | 0.23798200  |
| C | -6.63268800 | 2.17612600  | 0.81128800  |
| C | -7.02828600 | 2.26291900  | 2.26962500  |
| C | -5.82595200 | 2.16019500  | 3.24661100  |
| H | -4.68387400 | 0.25719400  | 3.15322000  |
| H | -2.71238700 | 1.03179500  | 2.04470200  |
| H | -2.58896300 | 3.01126000  | 0.74610300  |
| H | -2.89984000 | 3.74424000  | 2.31327500  |
| H | -5.15395100 | 4.28619000  | 1.75674400  |
| H | -4.28859700 | 4.54560600  | 0.25693000  |
| H | -5.47506000 | 2.82046200  | -0.84744200 |
| H | -7.38052800 | 1.75620500  | 0.13961000  |
| H | -7.71854100 | 1.43929700  | 2.47753800  |
| H | -7.58612400 | 3.18937800  | 2.47875400  |
| H | -5.43276500 | 3.15790400  | 3.46244800  |
| H | -6.18658400 | 1.76502300  | 4.20345100  |

**im10f**

SCF Energy (a.u.) = -1944.859109

Thermal correction to Gibbs free energy (a.u.) = 0.695950

Charge = 0, Multiplicity = 1

|   |             |             |             |
|---|-------------|-------------|-------------|
| C | 7.48567000  | -1.04328500 | 0.95001400  |
| C | 8.49388700  | -1.79326100 | 0.32686200  |
| C | 9.81523600  | -1.36359700 | 0.32412000  |
| C | 10.18293700 | -0.15863200 | 0.94931200  |
| C | 9.17050900  | 0.58781200  | 1.57284200  |
| C | 7.84716100  | 0.15529900  | 1.57274300  |
| H | 8.23380700  | -2.72909600 | -0.16322800 |
| H | 10.57015900 | -1.97094600 | -0.16589200 |
| H | 9.42832900  | 1.52455300  | 2.06102800  |
| H | 7.08062400  | 0.76235200  | 2.04608800  |
| C | 11.56301000 | 0.34538500  | 0.97744600  |
| C | 12.65044600 | -0.22880500 | 0.44777500  |
| H | 11.68497100 | 1.29705000  | 1.49465300  |
| H | 13.62577300 | 0.24032900  | 0.53051600  |
| H | 12.61612700 | -1.17675600 | -0.08207000 |
| C | 5.36039000  | -1.02747100 | -0.43791600 |
| C | 6.04634400  | -1.48527200 | 0.87938100  |
| H | 5.98138500  | -2.57828300 | 0.94150700  |
| H | 5.49428600  | -1.07656400 | 1.73250900  |
| H | 5.99618800  | -1.37760400 | -1.26089400 |
| C | 3.97635900  | -1.61942500 | -0.64065800 |
| C | 3.45802300  | -1.70010100 | -1.94055000 |
| C | 3.15384600  | -2.01146500 | 0.41925300  |
| C | 2.15065500  | -2.11732500 | -2.16806600 |
| H | 4.08463700  | -1.40597600 | -2.77929500 |
| C | 1.84016100  | -2.42155800 | 0.19088600  |
| H | 3.52273300  | -1.97587100 | 1.43912000  |
| C | 1.31128000  | -2.46142100 | -1.10045300 |
| H | 1.76593400  | -2.15234100 | -3.18515500 |
| H | 1.20394500  | -2.67471500 | 1.03463300  |
| C | 5.34598600  | 3.30692300  | -0.54907600 |
| C | 6.33644000  | 2.58747000  | -1.21792800 |

|   |             |             |             |
|---|-------------|-------------|-------------|
| C | 6.32220100  | 1.19217600  | -1.19702700 |
| C | 5.32072400  | 0.49487600  | -0.51336100 |
| C | 4.32591800  | 1.22540200  | 0.14976300  |
| C | 4.34103900  | 2.61972700  | 0.13562100  |
| H | 5.35452800  | 4.39321300  | -0.56253200 |
| H | 7.12389300  | 3.11034200  | -1.75371300 |
| H | 7.10712900  | 0.63555800  | -1.70190200 |
| H | 3.52591300  | 0.70153600  | 0.66443000  |
| H | 3.56533800  | 3.17195900  | 0.65999800  |
| C | -0.90639300 | -1.37656000 | -1.56194600 |
| C | -0.15811600 | -2.71493500 | -1.32452400 |
| H | -0.32188200 | -3.36930400 | -2.18981100 |
| H | -0.58109400 | -3.21859600 | -0.44854000 |
| H | -0.46818900 | -0.92675600 | -2.46199400 |
| C | -2.40260400 | -1.51505900 | -1.78861000 |
| C | -3.10464100 | -0.38777300 | -2.23797500 |
| C | -3.13657900 | -2.66041400 | -1.47114700 |
| C | -4.49116500 | -0.37433500 | -2.27418100 |
| H | -2.55194900 | 0.50888200  | -2.50664100 |
| C | -4.53492400 | -2.64611800 | -1.51147800 |
| H | -2.62943000 | -3.56906400 | -1.16334800 |
| C | -5.23592900 | -1.48684500 | -1.85224900 |
| H | -5.00785700 | 0.53035700  | -2.57979000 |
| H | -5.08539900 | -3.54120500 | -1.23350000 |
| C | -0.13235800 | 1.33651300  | 1.73443300  |
| C | 0.55662800  | 1.47905200  | 0.52942200  |
| C | 0.29960900  | 0.60978800  | -0.53195000 |
| C | -0.65227000 | -0.40706800 | -0.41075800 |
| C | -1.34014100 | -0.54178500 | 0.80175000  |
| C | -1.08011000 | 0.31817300  | 1.86866500  |
| H | 0.06473500  | 2.01245900  | 2.56159000  |
| H | 1.29533600  | 2.26597600  | 0.40900100  |
| H | 0.85690500  | 0.71198800  | -1.45876500 |
| H | -2.09326700 | -1.31852000 | 0.90346300  |

|    |             |             |             |
|----|-------------|-------------|-------------|
| H  | -1.62031000 | 0.19670800  | 2.80410100  |
| C  | -4.86141400 | 2.92984800  | 0.06905600  |
| C  | -4.41892800 | 1.76289700  | 0.67990600  |
| C  | -5.20831600 | 0.61796700  | 0.58229500  |
| C  | -6.41719500 | 0.62069700  | -0.12373000 |
| C  | -6.83656400 | 1.82181200  | -0.70709100 |
| C  | -6.06819700 | 2.98432600  | -0.61926900 |
| H  | -3.46745100 | 1.73046100  | 1.19771800  |
| H  | -4.85386500 | -0.29313500 | 1.04817200  |
| H  | -7.77460800 | 1.85106800  | -1.25672400 |
| H  | -6.40309000 | 3.90688600  | -1.07969800 |
| C  | -7.21991900 | -0.64883000 | -0.37811400 |
| C  | -6.73182700 | -1.37277300 | -1.69285100 |
| H  | -7.20437300 | -2.36026600 | -1.72720700 |
| H  | -7.13365700 | -0.79299900 | -2.53210400 |
| Br | -3.74865900 | 4.53928500  | 0.17619500  |
| H  | -8.24230000 | -0.32691500 | -0.60762800 |
| C  | -7.67303500 | -3.15986200 | 3.13634700  |
| C  | -6.46888700 | -3.17512000 | 2.43240400  |
| C  | -6.30232500 | -2.38011900 | 1.29758400  |
| C  | -7.33803900 | -1.55260100 | 0.83943900  |
| C  | -8.54153200 | -1.54965600 | 1.55779400  |
| C  | -8.71213900 | -2.34108900 | 2.69320900  |
| H  | -7.80071000 | -3.77943300 | 4.01943800  |
| H  | -5.65116800 | -3.80858600 | 2.76574500  |
| H  | -5.36044800 | -2.41284900 | 0.76515600  |
| H  | -9.35706200 | -0.91399700 | 1.22097000  |
| H  | -9.65695200 | -2.31837400 | 3.22928300  |

**im3e**

SCF Energy (a.u.) = -2438.367508

Thermal correction to Gibbs free energy (a.u.) = 0.812479

Charge = 0, Multiplicity = 1

|   |             |             |             |
|---|-------------|-------------|-------------|
| C | 8.10890400  | -1.99413300 | 0.65823100  |
| C | 9.04182500  | -2.83834500 | 0.03887400  |
| C | 10.32888200 | -2.40197400 | -0.25093200 |
| C | 10.73568300 | -1.09440900 | 0.06848000  |
| C | 9.79806800  | -0.25291600 | 0.68827600  |
| C | 8.50924200  | -0.69261400 | 0.97762600  |
| H | 8.75031400  | -3.85468800 | -0.21737400 |
| H | 11.02610500 | -3.08419500 | -0.72774900 |
| H | 10.08732700 | 0.76357400  | 0.94391400  |
| H | 7.79985500  | -0.01463800 | 1.44338100  |
| C | 12.08224400 | -0.57820100 | -0.21411600 |
| C | 13.10128100 | -1.23185700 | -0.78597900 |
| H | 12.24033700 | 0.45748400  | 0.08652200  |
| H | 14.05762900 | -0.74410600 | -0.94629200 |
| H | 13.02766900 | -2.26538000 | -1.11300800 |
| C | 5.78926000  | -2.20060700 | -0.33118400 |
| C | 6.69511000  | -2.46008900 | 0.90021900  |
| H | 6.68222200  | -3.53375000 | 1.12288800  |
| H | 6.27928500  | -1.94295900 | 1.77182200  |
| H | 6.29076400  | -2.65500200 | -1.19483000 |
| C | 4.40037200  | -2.80998000 | -0.22487100 |
| C | 3.66574100  | -3.00502500 | -1.40396300 |
| C | 3.76948900  | -3.07591500 | 0.99282100  |
| C | 2.32776600  | -3.37669600 | -1.36085500 |
| H | 4.14441500  | -2.81933900 | -2.36255300 |
| C | 2.42078100  | -3.43815100 | 1.03508800  |
| H | 4.31119900  | -2.95904500 | 1.92593800  |
| C | 1.66976200  | -3.55448000 | -0.13519700 |
| H | 1.76946200  | -3.48463700 | -2.28842600 |
| H | 1.93307800  | -3.57211400 | 1.99683600  |
| C | 5.46320600  | 2.05658000  | -1.10662600 |
| C | 6.24148000  | 1.24946900  | -1.93605200 |
| C | 6.34410400  | -0.12112600 | -1.68671700 |
| C | 5.66852300  | -0.70588100 | -0.61245500 |

|    |             |             |             |
|----|-------------|-------------|-------------|
| C  | 4.89370100  | 0.11389600  | 0.21910600  |
| C  | 4.79367400  | 1.48356400  | -0.02179100 |
| H  | 5.37148100  | 3.12135400  | -1.29874800 |
| H  | 6.77181900  | 1.68452500  | -2.77867100 |
| H  | 6.96297300  | -0.74356800 | -2.32774000 |
| H  | 4.35402400  | -0.32998500 | 1.05057100  |
| H  | 4.19434300  | 2.11161700  | 0.63201700  |
| C  | -0.48717300 | -2.29058400 | -0.41841100 |
| C  | 0.16738600  | -3.66932900 | -0.09866000 |
| H  | -0.18901600 | -4.39734300 | -0.83796400 |
| H  | -0.16146100 | -4.01181000 | 0.88820100  |
| H  | -0.03618300 | -1.95211000 | -1.35996700 |
| C  | -1.98699400 | -2.36416000 | -0.64354200 |
| C  | -2.60093700 | -1.36802500 | -1.40978300 |
| C  | -2.80934800 | -3.32177600 | -0.04076500 |
| C  | -3.98950300 | -1.29020800 | -1.52340100 |
| H  | -1.98583100 | -0.61425500 | -1.89757400 |
| C  | -4.20424600 | -3.25507100 | -0.14221800 |
| H  | -2.37403200 | -4.11703400 | 0.55638200  |
| C  | -4.79939900 | -2.21622400 | -0.86786600 |
| H  | -4.41728500 | -0.47305100 | -2.08671000 |
| H  | -4.80804100 | -3.99018300 | 0.37666100  |
| Br | -7.16304200 | -2.38138800 | 1.42534800  |
| C  | 0.56117400  | 0.63113800  | 2.62613100  |
| C  | 1.45828500  | 0.32053100  | 1.60321600  |
| C  | 1.11054300  | -0.59600800 | 0.61170600  |
| C  | -0.13440600 | -1.24610200 | 0.64365000  |
| C  | -1.02073600 | -0.93218100 | 1.68091600  |
| C  | -0.68365500 | 0.00611800  | 2.65774600  |
| H  | 0.82505500  | 1.36710200  | 3.38018600  |
| H  | 2.42440500  | 0.81225700  | 1.56222800  |
| H  | 1.81405900  | -0.81042500 | -0.18665800 |
| H  | -1.99759200 | -1.40057200 | 1.71472600  |
| H  | -1.40796900 | 0.25943800  | 3.42507800  |

|    |             |             |             |
|----|-------------|-------------|-------------|
| Ni | -6.65748300 | -2.09494000 | -0.79695500 |
| C  | -5.01754100 | 2.70824700  | -1.33050400 |
| C  | -5.00315100 | 2.12897600  | -2.60743400 |
| C  | -5.85454700 | 1.07513100  | -2.92388700 |
| C  | -6.74440100 | 0.57554900  | -1.95893000 |
| C  | -6.86832800 | 1.25790000  | -0.73627100 |
| C  | -6.01179100 | 2.30655400  | -0.42660000 |
| H  | -4.27385700 | 2.46861300  | -3.33853700 |
| H  | -5.79931500 | 0.60264600  | -3.90035500 |
| H  | -7.56695900 | 0.89213500  | 0.01098100  |
| H  | -6.05935500 | 2.76503200  | 0.55537500  |
| C  | -7.42571400 | -0.71309200 | -2.12008000 |
| C  | -6.96922300 | -1.81352800 | -2.83260100 |
| H  | -8.42858500 | -0.77156300 | -1.68355500 |
| H  | -7.64798500 | -2.62431800 | -3.08720800 |
| H  | -6.03198300 | -1.78299300 | -3.37759300 |
| C  | -2.76533800 | 2.67640300  | -0.24423400 |
| C  | -3.87174500 | 3.57844800  | -0.88956500 |
| H  | -3.44060400 | 4.10254600  | -1.74953300 |
| H  | -4.19942300 | 4.33235900  | -0.16590800 |
| H  | -2.68553000 | 1.78901500  | -0.88240300 |
| C  | -1.39342200 | 3.32562800  | -0.23731200 |
| C  | -1.19904900 | 4.70712800  | -0.13024600 |
| C  | -0.26784700 | 2.49897500  | -0.32981400 |
| C  | 0.08602900  | 5.25696800  | -0.11610400 |
| H  | -2.05177300 | 5.37578000  | -0.05961000 |
| C  | 1.02232100  | 3.02464400  | -0.33118200 |
| H  | -0.39590000 | 1.42227500  | -0.38293800 |
| C  | 1.17607300  | 4.40165300  | -0.22056600 |
| H  | 0.22827000  | 6.32819900  | -0.02928900 |
| H  | 1.88211300  | 2.37090900  | -0.41332700 |
| Br | 2.98834800  | 5.15436400  | -0.20216000 |
| C  | -4.12354400 | 1.30524700  | 3.63812500  |
| C  | -4.28363200 | 0.50020900  | 2.50907400  |

|   |             |             |            |
|---|-------------|-------------|------------|
| C | -3.81294800 | 0.93910500  | 1.27129500 |
| C | -3.19267100 | 2.18629000  | 1.13490500 |
| C | -3.03061700 | 2.98267200  | 2.27444500 |
| C | -3.49028800 | 2.54544200  | 3.51724000 |
| H | -4.48678000 | 0.96933600  | 4.60539800 |
| H | -4.77672200 | -0.46532800 | 2.57985500 |
| H | -3.93284600 | 0.30267500  | 0.40371400 |
| H | -2.52920800 | 3.94300000  | 2.19335000 |
| H | -3.35240800 | 3.17403300  | 4.39292400 |

### TS2e

SCF Energy (a.u.) = -2438.354735

Thermal correction to Gibbs free energy (a.u.) = 0.805805

Charge = 0, Multiplicity = 1

|   |             |             |             |
|---|-------------|-------------|-------------|
| C | 9.45924800  | -0.13822700 | 0.87357200  |
| C | 10.58322800 | -0.73952600 | 0.28851900  |
| C | 11.77656900 | -0.04404500 | 0.13731100  |
| C | 11.89355300 | 1.28955600  | 0.56838300  |
| C | 10.76623700 | 1.88651600  | 1.15472900  |
| C | 9.57151700  | 1.18745600  | 1.30384300  |
| H | 10.51725800 | -1.77064000 | -0.05218800 |
| H | 12.62759800 | -0.54221900 | -0.31703500 |
| H | 10.83009800 | 2.91741600  | 1.49445100  |
| H | 8.70911500  | 1.68019400  | 1.74389800  |
| C | 13.12886100 | 2.07397700  | 0.43344800  |
| C | 14.29359000 | 1.67421400  | -0.09218300 |
| H | 13.05917900 | 3.09361100  | 0.81224600  |
| H | 15.14442300 | 2.34649900  | -0.13997400 |
| H | 14.44722100 | 0.67503500  | -0.49037700 |
| C | 7.32954400  | -0.76944800 | -0.35353200 |
| C | 8.15067200  | -0.88126200 | 0.96153800  |
| H | 8.32951700  | -1.94327400 | 1.16834500  |
| H | 7.55706600  | -0.48291900 | 1.79129900  |
| H | 7.99414100  | -1.08825600 | -1.16624900 |

|   |             |             |             |
|---|-------------|-------------|-------------|
| C | 6.10467800  | -1.66693200 | -0.38314000 |
| C | 5.59320500  | -2.07695400 | -1.62194100 |
| C | 5.41006600  | -2.04262900 | 0.77050800  |
| C | 4.40859900  | -2.80179500 | -1.70568300 |
| H | 6.12351700  | -1.80228100 | -2.53073200 |
| C | 4.21723800  | -2.76047900 | 0.68542900  |
| H | 5.78211900  | -1.75735600 | 1.74911600  |
| C | 3.68801500  | -3.13360100 | -0.55132500 |
| H | 4.02419600  | -3.09385500 | -2.68081300 |
| H | 3.67028000  | -3.00005200 | 1.59321300  |
| C | 6.36450900  | 3.40498700  | -1.01896200 |
| C | 7.44964700  | 2.81904600  | -1.67093900 |
| C | 7.74058100  | 1.46898200  | -1.47015900 |
| C | 6.95361100  | 0.68358800  | -0.62146400 |
| C | 5.86143000  | 1.27842900  | 0.02342900  |
| C | 5.57212400  | 2.62888700  | -0.16992200 |
| H | 6.13663500  | 4.45626100  | -1.17109500 |
| H | 8.07454000  | 3.41226100  | -2.33281000 |
| H | 8.59986900  | 1.02183100  | -1.96259100 |
| H | 5.22433900  | 0.67924700  | 0.66698900  |
| H | 4.72575600  | 3.07685200  | 0.34454100  |
| C | 1.26624300  | -2.67378400 | -1.06201300 |
| C | 2.31295600  | -3.74415000 | -0.64964300 |
| H | 2.29960900  | -4.55675300 | -1.38671600 |
| H | 2.02680900  | -4.17322400 | 0.31721400  |
| H | 1.55296800  | -2.32602800 | -2.06377400 |
| C | -0.16161100 | -3.19457800 | -1.14341800 |
| C | -1.17557700 | -2.28119500 | -1.48343200 |
| C | -0.52592500 | -4.51170500 | -0.85075600 |
| C | -2.51374700 | -2.64760200 | -1.46926700 |
| H | -0.90411500 | -1.25453800 | -1.71478100 |
| C | -1.87109000 | -4.90511600 | -0.83985500 |
| H | 0.23186000  | -5.24932600 | -0.61012600 |
| C | -2.86804900 | -3.95014500 | -1.07630800 |

|    |             |             |             |
|----|-------------|-------------|-------------|
| H  | -3.28363700 | -1.91868200 | -1.69651600 |
| H  | -2.13222800 | -5.93117900 | -0.59564700 |
| Br | -5.14004800 | -4.11045500 | 2.28280500  |
| C  | 1.53833600  | 0.73287700  | 1.60415600  |
| C  | 2.16486800  | 0.76393300  | 0.35778800  |
| C  | 2.06270200  | -0.32886000 | -0.50411600 |
| C  | 1.33698900  | -1.46535200 | -0.13482700 |
| C  | 0.71454300  | -1.48905400 | 1.11983600  |
| C  | 0.81188700  | -0.39844300 | 1.98326000  |
| H  | 1.61048300  | 1.58457100  | 2.27462800  |
| H  | 2.73443100  | 1.63553900  | 0.04929200  |
| H  | 2.56976600  | -0.30683700 | -1.46449300 |
| H  | 0.13942500  | -2.36245700 | 1.41627200  |
| H  | 0.31354100  | -0.42903400 | 2.94801600  |
| Ni | -4.27914600 | -4.08144200 | 0.14782800  |
| C  | -6.54068100 | 0.21606200  | -1.34136300 |
| C  | -5.93966600 | -0.43770500 | -2.42297100 |
| C  | -5.74004500 | -1.81545600 | -2.40264500 |
| C  | -6.14229500 | -2.58329600 | -1.29614800 |
| C  | -6.84146000 | -1.93785500 | -0.26154100 |
| C  | -7.02942100 | -0.56304400 | -0.28527800 |
| H  | -5.58987700 | 0.14165100  | -3.27436700 |
| H  | -5.25668700 | -2.29130800 | -3.25068600 |
| H  | -7.15165700 | -2.51283000 | 0.60483700  |
| H  | -7.50425400 | -0.07577400 | 0.56058700  |
| C  | -5.76078100 | -4.00105500 | -1.12454000 |
| C  | -4.68984900 | -4.60362500 | -1.85866900 |
| H  | -6.48971900 | -4.65169500 | -0.64442900 |
| H  | -4.62605500 | -5.68842800 | -1.87994800 |
| H  | -4.33403700 | -4.13173300 | -2.76693000 |
| C  | -5.09759400 | 2.21745500  | -0.83861200 |
| C  | -6.51912200 | 1.71897300  | -1.23482000 |
| H  | -6.80874100 | 2.18531500  | -2.18435000 |
| H  | -7.24011900 | 2.04334900  | -0.47665900 |

|    |             |             |             |
|----|-------------|-------------|-------------|
| H  | -4.44661000 | 2.00435400  | -1.69783900 |
| C  | -5.02233000 | 3.71802200  | -0.58018000 |
| C  | -6.09940000 | 4.58669700  | -0.77700800 |
| C  | -3.80691800 | 4.26220600  | -0.13726100 |
| C  | -5.97817400 | 5.96038600  | -0.54311900 |
| H  | -7.05646200 | 4.20806000  | -1.11802200 |
| C  | -3.66174400 | 5.62636900  | 0.09824500  |
| H  | -2.96319400 | 3.60099900  | 0.03853800  |
| C  | -4.75832300 | 6.45903600  | -0.10952000 |
| H  | -6.82344100 | 6.62138400  | -0.69724200 |
| H  | -2.71648700 | 6.03153000  | 0.44102800  |
| Br | -4.57333700 | 8.38004200  | 0.22364000  |
| C  | -3.71939300 | -0.25587500 | 2.43548700  |
| C  | -3.14022700 | -0.37949900 | 1.17290300  |
| C  | -3.56059600 | 0.44930100  | 0.13134200  |
| C  | -4.55765500 | 1.40820600  | 0.33193400  |
| C  | -5.10910600 | 1.54660200  | 1.61127700  |
| C  | -4.69808100 | 0.71715600  | 2.65384600  |
| H  | -3.41643700 | -0.91758300 | 3.24067900  |
| H  | -2.36857700 | -1.12080700 | 0.99360800  |
| H  | -3.12098700 | 0.34039000  | -0.85682700 |
| H  | -5.87009900 | 2.30310100  | 1.78657800  |
| H  | -5.14613000 | 0.82467600  | 3.63770700  |

#### im4e

SCF Energy (a.u.) = -2438.393983

Thermal correction to Gibbs free energy (a.u.) = 0.811022

Charge = 0, Multiplicity = 1

|   |             |            |             |
|---|-------------|------------|-------------|
| C | 9.05480700  | 0.66004200 | 0.64137800  |
| C | 10.21764500 | 0.43600000 | -0.11012700 |
| C | 11.25941700 | 1.35540800 | -0.11826100 |
| C | 11.17852400 | 2.54337300 | 0.63015200  |
| C | 10.01320400 | 2.76236300 | 1.38188100  |
| C | 8.97055400  | 1.83981200 | 1.38718500  |

|   |             |             |             |
|---|-------------|-------------|-------------|
| H | 10.30367200 | -0.47625200 | -0.69667400 |
| H | 12.14641600 | 1.14765500  | -0.70897000 |
| H | 9.92508500  | 3.67422700  | 1.96752200  |
| H | 8.07228200  | 2.04366400  | 1.96311000  |
| C | 12.24751900 | 3.55131200  | 0.65887300  |
| C | 13.42025000 | 3.51268400  | 0.01396300  |
| H | 12.03325500 | 4.41814200  | 1.28392900  |
| H | 14.13735100 | 4.32175100  | 0.11065200  |
| H | 13.71199000 | 2.68555800  | -0.62734400 |
| C | 6.97649600  | -0.03729200 | -0.63651500 |
| C | 7.90330200  | -0.31087300 | 0.58057100  |
| H | 8.27694200  | -1.33930400 | 0.50702600  |
| H | 7.31588300  | -0.24238800 | 1.50243500  |
| H | 7.62093000  | -0.02138100 | -1.52444300 |
| C | 5.92224700  | -1.10922800 | -0.85197100 |
| C | 5.37449200  | -1.27358000 | -2.13168400 |
| C | 5.40783400  | -1.88941500 | 0.18762300  |
| C | 4.32184200  | -2.15531900 | -2.35452900 |
| H | 5.76667900  | -0.68166900 | -2.95530600 |
| C | 4.34587100  | -2.76622600 | -0.03409700 |
| H | 5.81509000  | -1.80170500 | 1.18949700  |
| C | 3.77394000  | -2.89772200 | -1.30067900 |
| H | 3.90235200  | -2.25104800 | -3.35396000 |
| H | 3.93027500  | -3.32572200 | 0.79945800  |
| C | 5.25913000  | 3.91937500  | -0.19694600 |
| C | 6.37481200  | 3.72120400  | -1.01051200 |
| C | 6.90877100  | 2.44120100  | -1.16588800 |
| C | 6.33740600  | 1.34176500  | -0.51699200 |
| C | 5.21259800  | 1.54870400  | 0.29222900  |
| C | 4.68079000  | 2.82753900  | 0.45463800  |
| H | 4.84224900  | 4.91478700  | -0.07200000 |
| H | 6.83456600  | 4.56254200  | -1.52165200 |
| H | 7.79112900  | 2.29432700  | -1.78290500 |
| H | 4.74041300  | 0.70378100  | 0.78454000  |

|    |             |             |             |
|----|-------------|-------------|-------------|
| H  | 3.81246800  | 2.97240800  | 1.09231500  |
| C  | 1.28283100  | -2.74287300 | -1.55095400 |
| C  | 2.50770900  | -3.69349300 | -1.49479000 |
| H  | 2.54785700  | -4.28065400 | -2.42115600 |
| H  | 2.38389300  | -4.39649500 | -0.66376800 |
| H  | 1.43097800  | -2.08816600 | -2.41952600 |
| C  | -0.05628000 | -3.44214200 | -1.72496700 |
| C  | -1.18858000 | -2.64905700 | -1.90917500 |
| C  | -0.22736600 | -4.83685000 | -1.61937200 |
| C  | -2.47972900 | -3.20150800 | -1.89591700 |
| H  | -1.07472000 | -1.57387500 | -2.01415900 |
| C  | -1.49487700 | -5.40388500 | -1.60281200 |
| H  | 0.63646800  | -5.48121600 | -1.50323500 |
| C  | -2.65500200 | -4.60093700 | -1.70736600 |
| H  | -3.33357000 | -2.56298700 | -2.08856000 |
| H  | -1.60780100 | -6.47650400 | -1.47304600 |
| Br | -2.48817800 | -3.84853600 | 2.50205800  |
| C  | 1.22449800  | -0.22451200 | 1.97482400  |
| C  | 1.69563700  | 0.27776500  | 0.76101200  |
| C  | 1.70197800  | -0.53101900 | -0.37633300 |
| C  | 1.23522200  | -1.84773600 | -0.31676100 |
| C  | 0.76031400  | -2.34252800 | 0.90438400  |
| C  | 0.75494200  | -1.53831300 | 2.04359200  |
| H  | 1.21293900  | 0.40643000  | 2.85901800  |
| H  | 2.05857000  | 1.29887200  | 0.69190000  |
| H  | 2.09295900  | -0.14272200 | -1.31259700 |
| H  | 0.37231000  | -3.35485300 | 0.97209800  |
| H  | 0.36378500  | -1.93973000 | 2.97343800  |
| Ni | -2.77739700 | -3.76754700 | 0.22153700  |
| C  | -6.54173900 | -0.69064700 | -0.21807500 |
| C  | -6.33034200 | -1.36831800 | -1.42354600 |
| C  | -5.74450600 | -2.63067800 | -1.44108400 |
| C  | -5.34793000 | -3.26249900 | -0.24705000 |
| C  | -5.66904000 | -2.62048500 | 0.96692600  |

|    |             |             |             |
|----|-------------|-------------|-------------|
| C  | -6.24954400 | -1.36089700 | 0.97681600  |
| H  | -6.58822500 | -0.88461100 | -2.36325400 |
| H  | -5.57497800 | -3.11395800 | -2.39812900 |
| H  | -5.37611000 | -3.08842800 | 1.90128600  |
| H  | -6.41331400 | -0.85702100 | 1.92450300  |
| C  | -4.51178900 | -4.48035300 | -0.20347000 |
| C  | -4.05962700 | -5.16572100 | -1.49582000 |
| H  | -4.74474900 | -5.15536400 | 0.62038500  |
| H  | -4.00040400 | -6.24806600 | -1.35614200 |
| H  | -4.71529500 | -4.97742200 | -2.35342300 |
| C  | -5.61863300 | 1.62051800  | -0.52886700 |
| C  | -6.88772000 | 0.77482100  | -0.21160000 |
| H  | -7.66285600 | 1.00153400  | -0.95381700 |
| H  | -7.27684100 | 1.06135900  | 0.77158100  |
| H  | -5.33594700 | 1.37332500  | -1.56139500 |
| C  | -5.84984900 | 3.12565200  | -0.47439500 |
| C  | -7.09049500 | 3.70414500  | -0.19334600 |
| C  | -4.76505300 | 3.97915900  | -0.72777100 |
| C  | -7.25596700 | 5.09296100  | -0.16588600 |
| H  | -7.95428600 | 3.08100300  | 0.00957500  |
| C  | -4.90637500 | 5.36364000  | -0.70978900 |
| H  | -3.78839100 | 3.54802900  | -0.92928400 |
| C  | -6.15932400 | 5.90154900  | -0.42654000 |
| H  | -8.22403100 | 5.52737700  | 0.05612900  |
| H  | -4.05869900 | 6.00984800  | -0.90737900 |
| Br | -6.37506800 | 7.84796600  | -0.39154000 |
| C  | -2.45759700 | 0.20258800  | 2.06569400  |
| C  | -2.44150400 | -0.11804500 | 0.70831700  |
| C  | -3.44030900 | 0.37237300  | -0.13425400 |
| C  | -4.46211600 | 1.18927100  | 0.36287700  |
| C  | -4.45199100 | 1.52765800  | 1.72072400  |
| C  | -3.46067300 | 1.03337000  | 2.56802900  |
| H  | -1.69230100 | -0.19796400 | 2.72041000  |
| H  | -1.65191000 | -0.75227200 | 0.31866600  |

|   |             |            |             |
|---|-------------|------------|-------------|
| H | -3.44476400 | 0.09979100 | -1.18712900 |
| H | -5.22960000 | 2.17735000 | 2.11469700  |
| H | -3.47301600 | 1.29467400 | 3.62265500  |

**im5e**

SCF Energy (a.u.) = -2579.435872

Thermal correction to Gibbs free energy (a.u.) = 0.875102

Charge = 0, Multiplicity = 1

|   |             |             |             |
|---|-------------|-------------|-------------|
| C | 9.04275800  | 0.76665900  | 0.63819500  |
| C | 10.20856000 | 0.58117600  | -0.11918800 |
| C | 11.23155500 | 1.52143700  | -0.11039700 |
| C | 11.12805900 | 2.69235800  | 0.66170600  |
| C | 9.95972400  | 2.87291800  | 1.41895600  |
| C | 8.93593900  | 1.92955100  | 1.40730100  |
| H | 10.31187700 | -0.31723200 | -0.72402200 |
| H | 12.12139700 | 1.34361800  | -0.70657800 |
| H | 9.85417600  | 3.77107300  | 2.02262900  |
| H | 8.03465500  | 2.10379900  | 1.98821100  |
| C | 12.17670100 | 3.72074700  | 0.70942600  |
| C | 13.35046300 | 3.71696200  | 0.06524800  |
| H | 11.94478600 | 4.57180500  | 1.34967300  |
| H | 14.05115700 | 4.53837200  | 0.17699600  |
| H | 13.65918900 | 2.90727700  | -0.59020500 |
| C | 6.97469400  | 0.05316700  | -0.64814100 |
| C | 7.91123200  | -0.22624900 | 0.56019500  |
| H | 8.30570300  | -1.24500700 | 0.46416100  |
| H | 7.32559500  | -0.18910700 | 1.48499900  |
| H | 7.61544900  | 0.10064600  | -1.53758700 |
| C | 5.94205600  | -1.03584100 | -0.88204600 |
| C | 5.39469400  | -1.18750000 | -2.16354400 |
| C | 5.44598700  | -1.84561300 | 0.14372200  |
| C | 4.35999500  | -2.08662000 | -2.40091200 |
| H | 5.77263200  | -0.57232500 | -2.97671600 |
| C | 4.40167200  | -2.73962600 | -0.09255000 |

|   |             |             |             |
|---|-------------|-------------|-------------|
| H | 5.85354300  | -1.76808500 | 1.14633800  |
| C | 3.82959900  | -2.85971200 | -1.36017200 |
| H | 3.94024800  | -2.17232300 | -3.40109800 |
| H | 3.99929600  | -3.32307900 | 0.73112800  |
| C | 5.17698800  | 3.96324900  | -0.12134500 |
| C | 6.29342700  | 3.80520400  | -0.94259100 |
| C | 6.85345000  | 2.54013200  | -1.12611000 |
| C | 6.30771700  | 1.41592200  | -0.49800700 |
| C | 5.18214700  | 1.58272100  | 0.31939100  |
| C | 4.62421900  | 2.84645700  | 0.50983300  |
| H | 4.73960800  | 4.94684100  | 0.02513200  |
| H | 6.73335700  | 4.66626300  | -1.43808800 |
| H | 7.73614800  | 2.42446700  | -1.74925000 |
| H | 4.72987500  | 0.71807300  | 0.79593500  |
| H | 3.75531400  | 2.96010800  | 1.15302900  |
| C | 1.33018600  | -2.76526400 | -1.60333400 |
| C | 2.58233300  | -3.68123500 | -1.56714800 |
| H | 2.63567500  | -4.24918300 | -2.50475300 |
| H | 2.47820000  | -4.40355400 | -0.75003400 |
| H | 1.45816000  | -2.08887700 | -2.45841800 |
| C | 0.01288400  | -3.50439600 | -1.78340500 |
| C | -1.14760100 | -2.74573100 | -1.92418400 |
| C | -0.11357400 | -4.90535800 | -1.69811200 |
| C | -2.42182000 | -3.33602700 | -1.85875300 |
| H | -1.07062400 | -1.66619100 | -2.01971700 |
| C | -1.36333300 | -5.50786200 | -1.63626700 |
| H | 0.77219200  | -5.52651700 | -1.62764100 |
| C | -2.54816400 | -4.73721900 | -1.66479300 |
| H | -3.30281300 | -2.72206100 | -2.00752800 |
| H | -1.43999900 | -6.58560000 | -1.52021400 |
| C | 1.16601900  | -0.30897700 | 1.96722000  |
| C | 1.69273500  | 0.20673700  | 0.78211500  |
| C | 1.73642700  | -0.58301000 | -0.36761500 |
| C | 1.25502900  | -1.89610300 | -0.35021900 |

|    |             |             |             |
|----|-------------|-------------|-------------|
| C  | 0.72862700  | -2.40485600 | 0.84407800  |
| C  | 0.68096500  | -1.61834000 | 1.99446600  |
| H  | 1.12124500  | 0.30933700  | 2.85931100  |
| H  | 2.06601600  | 1.22575500  | 0.74367200  |
| H  | 2.16477500  | -0.18118500 | -1.28143900 |
| H  | 0.32469200  | -3.41255600 | 0.87971500  |
| H  | 0.23873200  | -2.02800700 | 2.89720800  |
| Ni | -2.59728100 | -3.84978600 | 0.27548800  |
| C  | -6.58948400 | -0.94826600 | -0.09979900 |
| C  | -6.37432700 | -1.64265700 | -1.29234400 |
| C  | -5.71468300 | -2.87136400 | -1.29829500 |
| C  | -5.23950800 | -3.44563400 | -0.10664900 |
| C  | -5.55816700 | -2.78984900 | 1.09906400  |
| C  | -6.21460400 | -1.56923500 | 1.09987100  |
| H  | -6.68558800 | -1.19878700 | -2.23595000 |
| H  | -5.54429500 | -3.36520700 | -2.25002600 |
| H  | -5.19694700 | -3.20877500 | 2.03295400  |
| H  | -6.37431700 | -1.04954400 | 2.04014600  |
| C  | -4.32712800 | -4.61571800 | -0.05827700 |
| C  | -3.92071200 | -5.33028500 | -1.35575700 |
| H  | -4.53239100 | -5.28697700 | 0.77853400  |
| H  | -3.82049200 | -6.40594100 | -1.18630800 |
| H  | -4.62766000 | -5.19398300 | -2.18295500 |
| C  | -5.79717100 | 1.40205900  | -0.48102400 |
| C  | -7.01177300 | 0.49759000  | -0.11401000 |
| H  | -7.81619000 | 0.67003700  | -0.83973400 |
| H  | -7.39025300 | 0.78537500  | 0.87330800  |
| H  | -5.52901800 | 1.14773000  | -1.51564100 |
| C  | -6.10341000 | 2.89410200  | -0.45097600 |
| C  | -7.36264000 | 3.41504500  | -0.14115100 |
| C  | -5.07312500 | 3.79629000  | -0.75800900 |
| C  | -7.59889500 | 4.79392700  | -0.13705300 |
| H  | -8.18562500 | 2.75269400  | 0.10285100  |
| C  | -5.28494200 | 5.17189800  | -0.76394500 |

|    |             |             |             |
|----|-------------|-------------|-------------|
| H  | -4.08259700 | 3.41086900  | -0.98316300 |
| C  | -6.55430800 | 5.65113900  | -0.45038200 |
| H  | -8.58057700 | 5.18336100  | 0.10757900  |
| H  | -4.47867500 | 5.85598200  | -1.00305500 |
| Br | -6.86912800 | 7.58519200  | -0.44811000 |
| C  | -2.51379400 | 0.18156700  | 2.06010000  |
| C  | -2.53209500 | -0.19188300 | 0.71641000  |
| C  | -3.56861500 | 0.24050200  | -0.11130900 |
| C  | -4.59724700 | 1.04803400  | 0.38723400  |
| C  | -4.55393000 | 1.43923500  | 1.73007000  |
| C  | -3.52229000 | 1.00551400  | 2.56259000  |
| H  | -1.71723600 | -0.17377900 | 2.70391200  |
| H  | -1.74228100 | -0.82636100 | 0.32759000  |
| H  | -3.60204700 | -0.07798300 | -1.15038000 |
| H  | -5.33782900 | 2.08096200  | 2.12458800  |
| H  | -3.50862200 | 1.30876100  | 3.60616800  |
| O  | -2.43207100 | -3.60697700 | 2.02101200  |
| C  | -2.61500200 | -4.57732500 | 3.01233700  |
| C  | -2.15119200 | -4.02349600 | 4.35878600  |
| H  | -2.06053600 | -5.50791900 | 2.79093600  |
| H  | -3.68153200 | -4.85921500 | 3.09338800  |
| H  | -2.30442000 | -4.75378300 | 5.16311800  |
| H  | -1.08494800 | -3.77198900 | 4.31696900  |
| H  | -2.70609900 | -3.11022800 | 4.59940700  |

**im6e**

SCF Energy (a.u.) = -3183.160338

Thermal correction to Gibbs free energy (a.u.) = 1.110250

Charge = 0, Multiplicity = 1

|   |             |            |            |
|---|-------------|------------|------------|
| C | 11.14387200 | 1.00028000 | 0.88212000 |
| C | 12.32112600 | 0.85721900 | 0.13319300 |
| C | 13.39951700 | 1.71465100 | 0.31354000 |
| C | 13.34269800 | 2.75616900 | 1.25695600 |
| C | 12.16283900 | 2.89445200 | 2.00515200 |

|   |             |             |             |
|---|-------------|-------------|-------------|
| C | 11.08352100 | 2.03449700  | 1.82126800  |
| H | 12.38891300 | 0.05855800  | -0.60243500 |
| H | 14.29624900 | 1.57259300  | -0.28194100 |
| H | 12.09272600 | 3.69339300  | 2.73937100  |
| H | 10.17540000 | 2.17638800  | 2.40037000  |
| C | 14.45070500 | 3.69286500  | 1.49000900  |
| C | 15.64308700 | 3.71121900  | 0.88120300  |
| H | 14.25036400 | 4.44799700  | 2.25007200  |
| H | 16.38898800 | 4.45718400  | 1.13686800  |
| H | 15.92310800 | 2.99419200  | 0.11441300  |
| C | 9.08363600  | 0.62890500  | -0.55448300 |
| C | 9.95634600  | 0.10915300  | 0.62217000  |
| H | 10.28974300 | -0.90765500 | 0.38220200  |
| H | 9.34024700  | 0.04569700  | 1.52548100  |
| H | 9.75870300  | 0.76637800  | -1.40856400 |
| C | 7.99611500  | -0.34283300 | -0.97878100 |
| C | 7.48927400  | -0.26670800 | -2.28324600 |
| C | 7.41432600  | -1.26283200 | -0.10178900 |
| C | 6.41222200  | -1.05144300 | -2.68253100 |
| H | 7.93361600  | 0.43682600  | -2.98349500 |
| C | 6.32910700  | -2.04333900 | -0.50039200 |
| H | 7.78778200  | -1.36241000 | 0.91220200  |
| C | 5.79708400  | -1.93546000 | -1.78666600 |
| H | 6.02516500  | -0.95893800 | -3.69513400 |
| H | 5.86368600  | -2.71723600 | 0.21343000  |
| C | 7.52378800  | 4.52922700  | 0.51993600  |
| C | 8.66581000  | 4.42023900  | -0.27382200 |
| C | 9.14841800  | 3.16185400  | -0.63565000 |
| C | 8.49934700  | 1.99586100  | -0.21593100 |
| C | 7.34801100  | 2.11481400  | 0.57330800  |
| C | 6.86739200  | 3.37091200  | 0.94225600  |
| H | 7.14663900  | 5.50726400  | 0.80559300  |
| H | 9.18576600  | 5.31356100  | -0.60874700 |
| H | 10.05069900 | 3.08079600  | -1.23577100 |

|    |             |             |             |
|----|-------------|-------------|-------------|
| H  | 6.81452000  | 1.22240300  | 0.88620400  |
| H  | 5.97698000  | 3.44483100  | 1.56133100  |
| C  | 3.32664100  | -1.62173700 | -2.10647700 |
| C  | 4.50770700  | -2.62805000 | -2.15045200 |
| H  | 4.56397200  | -3.06470200 | -3.15509400 |
| H  | 4.31441800  | -3.44735700 | -1.44904500 |
| H  | 3.53584600  | -0.86876700 | -2.87844400 |
| C  | 1.96771400  | -2.22894800 | -2.43052000 |
| C  | 0.85260600  | -1.37868200 | -2.45610200 |
| C  | 1.75989300  | -3.58069700 | -2.70937300 |
| C  | -0.41763400 | -1.85899600 | -2.74707300 |
| H  | 0.98249700  | -0.32574200 | -2.22929900 |
| C  | 0.48025300  | -4.06440600 | -3.00614800 |
| H  | 2.59127400  | -4.27768200 | -2.69642000 |
| C  | -0.62953400 | -3.21935400 | -3.03273200 |
| H  | -1.24417900 | -1.15582900 | -2.76109400 |
| H  | 0.34729300  | -5.12286600 | -3.21593300 |
| C  | 3.40009900  | 0.43358000  | 1.70789600  |
| C  | 3.77835200  | 1.10214500  | 0.54258800  |
| C  | 3.73476600  | 0.44210200  | -0.68751100 |
| C  | 3.30984400  | -0.88661300 | -0.77346900 |
| C  | 2.93103100  | -1.54808400 | 0.40071300  |
| C  | 2.97807700  | -0.89684900 | 1.63212600  |
| H  | 3.43157200  | 0.94325400  | 2.66675400  |
| H  | 4.11557400  | 2.13351900  | 0.58525500  |
| H  | 4.05613700  | 0.95871400  | -1.58764600 |
| H  | 2.59099000  | -2.57669500 | 0.34790300  |
| H  | 2.67879500  | -1.42653800 | 2.53248200  |
| Ni | -2.47956000 | -2.49425800 | -0.78729900 |
| C  | -6.01695700 | -0.53173700 | -1.97120900 |
| C  | -4.90819500 | -0.38525000 | -2.80212200 |
| C  | -3.95976900 | -1.40389200 | -2.93895200 |
| C  | -4.09858800 | -2.62732200 | -2.24414100 |
| C  | -5.23988900 | -2.76513600 | -1.40228800 |

|    |              |             |             |
|----|--------------|-------------|-------------|
| C  | -6.16718800  | -1.74958400 | -1.27195700 |
| H  | -4.78021800  | 0.53736600  | -3.36376400 |
| H  | -3.13138200  | -1.26369200 | -3.62403400 |
| H  | -5.35917500  | -3.68781600 | -0.84198400 |
| H  | -7.02076200  | -1.88362300 | -0.61526600 |
| C  | -3.02906500  | -3.62836500 | -2.20483000 |
| C  | -2.01687800  | -3.75147900 | -3.35099000 |
| H  | -3.33498600  | -4.58360300 | -1.78054900 |
| H  | -1.92648900  | -4.80752000 | -3.62668500 |
| H  | -2.40087000  | -3.24052800 | -4.24468100 |
| C  | -6.82433200  | 1.42733900  | -0.54049900 |
| C  | -7.02017900  | 0.58605700  | -1.82831000 |
| H  | -6.94063300  | 1.25516100  | -2.69268000 |
| H  | -8.03514400  | 0.17190000  | -1.83755400 |
| H  | -5.76364300  | 1.70574100  | -0.50122100 |
| C  | -7.62995800  | 2.72068000  | -0.53876900 |
| C  | -8.76231500  | 2.91781300  | -1.33447000 |
| C  | -7.24306200  | 3.75032300  | 0.33004200  |
| C  | -9.49399900  | 4.10748100  | -1.27283200 |
| H  | -9.09175000  | 2.14481800  | -2.02063700 |
| C  | -7.95441600  | 4.94496300  | 0.40692900  |
| H  | -6.37286100  | 3.60944000  | 0.96600800  |
| C  | -9.07652100  | 5.10420600  | -0.40163100 |
| H  | -10.36983400 | 4.24845100  | -1.89592200 |
| H  | -7.64195200  | 5.73395900  | 1.08144400  |
| Br | -10.08877200 | 6.77799600  | -0.30837200 |
| C  | -7.67404300  | -0.90671300 | 3.00966400  |
| C  | -6.39087900  | -0.41150800 | 2.78725500  |
| C  | -6.12196700  | 0.34768900  | 1.64661700  |
| C  | -7.12583200  | 0.62116300  | 0.71604800  |
| C  | -8.41820100  | 0.13348700  | 0.95645900  |
| C  | -8.69041100  | -0.62949100 | 2.08959000  |
| H  | -7.88626700  | -1.49945100 | 3.89524100  |
| H  | -5.59022200  | -0.62179800 | 3.48659900  |

|   |             |             |             |
|---|-------------|-------------|-------------|
| H | -5.11607100 | 0.71777200  | 1.47672600  |
| H | -9.21760900 | 0.36091000  | 0.25593800  |
| H | -9.69668100 | -1.00229700 | 2.26017400  |
| O | -2.15096600 | -3.80695800 | 0.44298500  |
| C | -1.04246300 | -4.65593900 | 0.32416000  |
| C | 0.29072000  | -3.94900500 | 0.55779600  |
| H | -1.02295900 | -5.14283200 | -0.66613800 |
| H | -1.15804800 | -5.46712100 | 1.06533000  |
| H | 1.13251700  | -4.64515300 | 0.44331600  |
| H | 0.41260900  | -3.14000700 | -0.16665500 |
| H | 0.31897900  | -3.51568500 | 1.56222200  |
| C | -0.97824200 | 1.18406700  | -0.66615500 |
| C | -0.11070400 | 0.53922300  | 0.22756900  |
| C | -0.58999000 | -0.47628800 | 1.04555900  |
| C | -1.94515100 | -0.87142600 | 1.01160100  |
| C | -2.80347600 | -0.21046600 | 0.10215500  |
| C | -2.31660600 | 0.80790500  | -0.73359800 |
| H | -0.60354400 | 1.97806400  | -1.30726500 |
| H | 0.93529700  | 0.82443800  | 0.27635300  |
| H | 0.08321100  | -0.97818100 | 1.73090800  |
| H | -3.86069700 | -0.45963100 | 0.08953500  |
| H | -2.99259700 | 1.29956600  | -1.42665300 |
| C | -2.09436300 | -3.61928500 | 3.68814100  |
| C | -4.33208300 | -3.35841100 | 2.65779700  |
| C | -3.60162100 | -3.58301900 | 3.99194600  |
| H | -1.85308900 | -4.51847100 | 3.10807000  |
| H | -5.40382800 | -3.20461900 | 2.82398400  |
| B | -2.48971200 | -1.98886200 | 1.98003700  |
| O | -1.65439900 | -2.48119300 | 2.95165900  |
| O | -3.84554500 | -2.21023800 | 1.97115000  |
| H | -1.51828000 | -3.64580500 | 4.62010600  |
| H | -4.19248900 | -4.22490800 | 2.00092200  |
| C | -4.03166600 | -4.93004000 | 4.58325000  |
| H | -3.82184200 | -5.75454100 | 3.89178200  |

|   |             |             |            |
|---|-------------|-------------|------------|
| H | -3.50351400 | -5.13256000 | 5.52264100 |
| H | -5.10671900 | -4.93525400 | 4.79923600 |
| C | -3.91447100 | -2.44578000 | 4.97621800 |
| H | -4.99157800 | -2.38856400 | 5.17396300 |
| H | -3.40487200 | -2.60978300 | 5.93305500 |
| H | -3.58669300 | -1.47873800 | 4.58412600 |

### TS3e

SCF Energy (a.u.) = -3183.160845

Thermal correction to Gibbs free energy (a.u.) = 1.112268

Charge = 0, Multiplicity = 1

|   |             |             |             |
|---|-------------|-------------|-------------|
| C | 11.14982900 | 0.99882700  | 0.89314400  |
| C | 12.33003100 | 0.84475000  | 0.15107400  |
| C | 13.40963700 | 1.70162800  | 0.32670000  |
| C | 13.35111300 | 2.75368400  | 1.25824400  |
| C | 12.16835300 | 2.90288800  | 1.99973100  |
| C | 11.08781400 | 2.04346500  | 1.82057200  |
| H | 12.39918000 | 0.03782300  | -0.57534900 |
| H | 14.30869500 | 1.55083600  | -0.26309800 |
| H | 12.09690200 | 3.71005400  | 2.72476800  |
| H | 10.17750100 | 2.19385400  | 2.39405600  |
| C | 14.46022500 | 3.69045900  | 1.48566000  |
| C | 15.65459900 | 3.70046300  | 0.88057400  |
| H | 14.25887900 | 4.45353300  | 2.23748100  |
| H | 16.40115900 | 4.44745000  | 1.13128500  |
| H | 15.93563500 | 2.97539300  | 0.12175800  |
| C | 9.09536300  | 0.61668600  | -0.54872800 |
| C | 9.96127300  | 0.10778400  | 0.63762200  |
| H | 10.29322900 | -0.91243600 | 0.41046100  |
| H | 9.34083600  | 0.05585500  | 1.53869900  |
| H | 9.77472000  | 0.74303100  | -1.40113100 |
| C | 8.00717000  | -0.35672800 | -0.96741800 |
| C | 7.50500800  | -0.29172100 | -2.27429900 |
| C | 7.42013400  | -1.26696400 | -0.08378400 |

|   |             |             |             |
|---|-------------|-------------|-------------|
| C | 6.42722800  | -1.07734000 | -2.66975700 |
| H | 7.95350300  | 0.40406600  | -2.97962000 |
| C | 6.33416800  | -2.04838500 | -0.47864900 |
| H | 7.78988900  | -1.35787200 | 0.93237200  |
| C | 5.80666000  | -1.95112400 | -1.76760900 |
| H | 6.04375900  | -0.99334900 | -3.68446700 |
| H | 5.86455500  | -2.71423800 | 0.23995400  |
| C | 7.54033400  | 4.53244700  | 0.47530500  |
| C | 8.68584400  | 4.41192100  | -0.31172900 |
| C | 9.16699400  | 3.14844100  | -0.65739100 |
| C | 8.51297300  | 1.98875100  | -0.22800400 |
| C | 7.35816200  | 2.11921000  | 0.55431800  |
| C | 6.87899000  | 3.38047900  | 0.90714100  |
| H | 7.16430000  | 5.51449600  | 0.74839400  |
| H | 9.20964700  | 5.30021700  | -0.65394500 |
| H | 10.07193400 | 3.05855600  | -1.25222700 |
| H | 6.82086600  | 1.23164200  | 0.87441600  |
| H | 5.98582300  | 3.46340500  | 1.52107600  |
| C | 3.33877100  | -1.63174400 | -2.09793000 |
| C | 4.51614300  | -2.64278700 | -2.12921500 |
| H | 4.57430800  | -3.08833400 | -3.12982800 |
| H | 4.31761800  | -3.45530500 | -1.42136400 |
| H | 3.55355200  | -0.88636500 | -2.87572500 |
| C | 1.97846800  | -2.23617000 | -2.42162800 |
| C | 0.86563700  | -1.38300200 | -2.44970000 |
| C | 1.76733800  | -3.58779600 | -2.69869500 |
| C | -0.40519800 | -1.86026500 | -2.74265300 |
| H | 0.99748600  | -0.33026600 | -2.22303800 |
| C | 0.48682600  | -4.06844000 | -2.99701500 |
| H | 2.59679300  | -4.28703000 | -2.68322600 |
| C | -0.62043500 | -3.22027100 | -3.02731400 |
| H | -1.22936000 | -1.15424900 | -2.75789800 |
| H | 0.35144600  | -5.12682200 | -3.20580900 |
| C | 3.40303500  | 0.45815200  | 1.69772300  |

|    |             |             |             |
|----|-------------|-------------|-------------|
| C  | 3.78457300  | 1.11595600  | 0.52741300  |
| C  | 3.74451300  | 0.44462600  | -0.69669400 |
| C  | 3.31975400  | -0.88477100 | -0.77158900 |
| C  | 2.93779400  | -1.53547400 | 0.40758800  |
| C  | 2.98136400  | -0.87296900 | 1.63307500  |
| H  | 3.43162700  | 0.97665500  | 2.65191200  |
| H  | 4.12151800  | 2.14774100  | 0.56152900  |
| H  | 4.06820900  | 0.95299100  | -1.60068800 |
| H  | 2.59800300  | -2.56460100 | 0.36333700  |
| H  | 2.67947000  | -1.39424200 | 2.53745000  |
| Ni | -2.50178000 | -2.45164800 | -0.81288900 |
| C  | -6.01505100 | -0.53619100 | -1.97700100 |
| C  | -4.89606300 | -0.38118200 | -2.79055800 |
| C  | -3.94610600 | -1.40011900 | -2.92708800 |
| C  | -4.09843300 | -2.63351900 | -2.25131300 |
| C  | -5.25037100 | -2.77849000 | -1.42354400 |
| C  | -6.17591600 | -1.76252300 | -1.29294900 |
| H  | -4.75941800 | 0.54743800  | -3.34000600 |
| H  | -3.11314500 | -1.25569400 | -3.60554100 |
| H  | -5.37822700 | -3.70742600 | -0.87567800 |
| H  | -7.03760300 | -1.90138600 | -0.64790800 |
| C  | -3.02475900 | -3.62715600 | -2.20849200 |
| C  | -2.00854900 | -3.74799200 | -3.35086800 |
| H  | -3.31884500 | -4.58025600 | -1.77146500 |
| H  | -1.92034300 | -4.80305800 | -3.63136200 |
| H  | -2.38865200 | -3.23169100 | -4.24300600 |
| C  | -6.83357200 | 1.41493100  | -0.54198500 |
| C  | -7.02008600 | 0.58009600  | -1.83516000 |
| H  | -6.93534700 | 1.25363800  | -2.69559300 |
| H  | -8.03445700 | 0.16486200  | -1.85344500 |
| H  | -5.77403000 | 1.69671500  | -0.49600900 |
| C  | -7.64354100 | 2.70560100  | -0.53741000 |
| C  | -8.77107400 | 2.90432400  | -1.33950500 |
| C  | -7.26578600 | 3.73081900  | 0.34063600  |

|    |              |             |             |
|----|--------------|-------------|-------------|
| C  | -9.50690200  | 4.09131100  | -1.27521700 |
| H  | -9.09348900  | 2.13478900  | -2.03285200 |
| C  | -7.98138900  | 4.92271900  | 0.42032000  |
| H  | -6.39955200  | 3.58849900  | 0.98166900  |
| C  | -9.09846700  | 5.08369400  | -0.39484500 |
| H  | -10.37894200 | 4.23355300  | -1.90331900 |
| H  | -7.67600600  | 5.70830200  | 1.10201800  |
| Br | -10.11655900 | 6.75372800  | -0.29777700 |
| C  | -7.69215500  | -0.93798800 | 2.99344500  |
| C  | -6.41034200  | -0.43508400 | 2.78075800  |
| C  | -6.13872900  | 0.32976400  | 1.64457900  |
| C  | -7.13832200  | 0.60115400  | 0.70883600  |
| C  | -8.42946000  | 0.10550600  | 0.93937500  |
| C  | -8.70437100  | -0.66303100 | 2.06811200  |
| H  | -7.90658800  | -1.53516300 | 3.87549300  |
| H  | -5.61246900  | -0.64335200 | 3.48385100  |
| H  | -5.13398400  | 0.70649000  | 1.48291200  |
| H  | -9.22587200  | 0.33131200  | 0.23489900  |
| H  | -9.70962200  | -1.04189700 | 2.23122500  |
| O  | -2.15761300  | -3.73280500 | 0.45415400  |
| C  | -1.06264600  | -4.60201500 | 0.34535700  |
| C  | 0.28394100   | -3.91668100 | 0.56357500  |
| H  | -1.05702000  | -5.10112200 | -0.63851300 |
| H  | -1.18990600  | -5.40095400 | 1.09738700  |
| H  | 1.11152400   | -4.62879200 | 0.44476700  |
| H  | 0.41366600   | -3.11420300 | -0.16641600 |
| H  | 0.32947800   | -3.47972400 | 1.56550000  |
| C  | -0.99201300  | 1.20201700  | -0.66424500 |
| C  | -0.11612600  | 0.55037000  | 0.21718100  |
| C  | -0.58654900  | -0.47305700 | 1.02973400  |
| C  | -1.94106600  | -0.87207700 | 1.00333800  |
| C  | -2.80859000  | -0.20180700 | 0.10964200  |
| C  | -2.33019700  | 0.82571300  | -0.72148100 |
| H  | -0.62397700  | 2.00237000  | -1.30127300 |

|   |             |             |             |
|---|-------------|-------------|-------------|
| H | 0.92968500  | 0.83759300  | 0.26078000  |
| H | 0.09310700  | -0.97821200 | 1.70609100  |
| H | -3.86650100 | -0.44885300 | 0.10742900  |
| H | -3.01380800 | 1.32461200  | -1.40187300 |
| C | -2.07886400 | -3.60780000 | 3.69777900  |
| C | -4.32021500 | -3.35027300 | 2.67355300  |
| C | -3.58506700 | -3.56368500 | 4.00735000  |
| H | -1.84295200 | -4.51783600 | 3.13166800  |
| H | -5.39178700 | -3.19767900 | 2.84253100  |
| B | -2.47502200 | -2.00716900 | 1.96144600  |
| O | -1.63827100 | -2.48184800 | 2.94492300  |
| O | -3.83732700 | -2.20683700 | 1.97885900  |
| H | -1.49954700 | -3.62410200 | 4.62813300  |
| H | -4.18312400 | -4.22314300 | 2.02392300  |
| C | -4.01685700 | -4.90243400 | 4.61562800  |
| H | -3.81374100 | -5.73542000 | 3.93226700  |
| H | -3.48459000 | -5.09684100 | 5.55445700  |
| H | -5.09081500 | -4.90139000 | 4.83717300  |
| C | -3.89015300 | -2.41420500 | 4.97960900  |
| H | -4.96594400 | -2.35328400 | 5.18368000  |
| H | -3.37476700 | -2.56704100 | 5.93523900  |
| H | -3.56368800 | -1.45296500 | 4.57266600  |

**im7e**

SCF Energy (a.u.) = -3183.164238

Thermal correction to Gibbs free energy (a.u.) = 1.113090

Charge = 0, Multiplicity = 1

|   |             |            |             |
|---|-------------|------------|-------------|
| C | 11.19267200 | 1.01099800 | 0.84205500  |
| C | 12.36289600 | 0.88432400 | 0.07931500  |
| C | 13.43901900 | 1.74432600 | 0.26104000  |
| C | 13.38684200 | 2.77200500 | 1.21977200  |
| C | 12.21412100 | 2.89367100 | 1.98194800  |
| C | 11.13705300 | 2.03121300 | 1.79666500  |
| H | 12.42698400 | 0.09661000 | -0.66836100 |

|   |             |             |             |
|---|-------------|-------------|-------------|
| H | 14.33035000 | 1.61509100  | -0.34536900 |
| H | 12.14772100 | 3.68162000  | 2.72827600  |
| H | 10.23422500 | 2.16042300  | 2.38689700  |
| C | 14.49253800 | 3.71095800  | 1.45476000  |
| C | 15.67771500 | 3.74523600  | 0.83272800  |
| H | 14.29692400 | 4.45320200  | 2.22861400  |
| H | 16.42256800 | 4.49118700  | 1.09146200  |
| H | 15.95266300 | 3.04177800  | 0.05166800  |
| C | 9.12079400  | 0.65205900  | -0.57988900 |
| C | 10.00637200 | 0.11857300  | 0.58075600  |
| H | 10.34157700 | -0.89330300 | 0.32301900  |
| H | 9.39914700  | 0.03966600  | 1.48885600  |
| H | 9.78710700  | 0.80361000  | -1.43845800 |
| C | 8.03156400  | -0.31626700 | -1.00768500 |
| C | 7.50850400  | -0.21867200 | -2.30432300 |
| C | 7.46355600  | -1.25361900 | -0.14013300 |
| C | 6.42892800  | -0.99950500 | -2.70413400 |
| H | 7.94192900  | 0.49873700  | -2.99725400 |
| C | 6.37563700  | -2.03032000 | -0.53900100 |
| H | 7.84973800  | -1.36984400 | 0.86725900  |
| C | 5.82751200  | -1.90095600 | -1.81640000 |
| H | 6.02906600  | -0.89012300 | -3.71008800 |
| H | 5.92101100  | -2.71785500 | 0.16871600  |
| C | 7.55959500  | 4.53172500  | 0.56442100  |
| C | 8.69244200  | 4.43768800  | -0.24426000 |
| C | 9.17535700  | 3.18608600  | -0.62849800 |
| C | 8.53560600  | 2.01224100  | -0.21654400 |
| C | 7.39336200  | 2.11620900  | 0.58786200  |
| C | 6.91255100  | 3.36543800  | 0.97917900  |
| H | 7.18231400  | 5.50440800  | 0.86759600  |
| H | 9.20508800  | 5.33737400  | -0.57335000 |
| H | 10.07082500 | 3.11640700  | -1.24015200 |
| H | 6.86703700  | 1.21768400  | 0.89541800  |
| H | 6.02948100  | 3.42779500  | 1.60988800  |

|    |             |             |             |
|----|-------------|-------------|-------------|
| C  | 3.35387100  | -1.58463100 | -2.09758800 |
| C  | 4.53472400  | -2.58905300 | -2.17712700 |
| H  | 4.58017800  | -3.00458500 | -3.19127300 |
| H  | 4.35125700  | -3.42319000 | -1.49051100 |
| H  | 3.55291800  | -0.81720900 | -2.85791600 |
| C  | 1.99103800  | -2.18420500 | -2.42063000 |
| C  | 0.87100200  | -1.34071600 | -2.38685000 |
| C  | 1.78576400  | -3.52210100 | -2.76385000 |
| C  | -0.39819800 | -1.81213300 | -2.69762500 |
| H  | 0.99319300  | -0.30193200 | -2.09865900 |
| C  | 0.50547400  | -3.99891700 | -3.06920100 |
| H  | 2.62104400  | -4.21365100 | -2.79576100 |
| C  | -0.60768500 | -3.15801300 | -3.04933700 |
| H  | -1.22366000 | -1.10636100 | -2.67498700 |
| H  | 0.37669500  | -5.04671600 | -3.32977700 |
| C  | 3.47298400  | 0.40230400  | 1.75041700  |
| C  | 3.82740900  | 1.09433800  | 0.59143600  |
| C  | 3.76868000  | 0.45614400  | -0.64930500 |
| C  | 3.35297500  | -0.87416600 | -0.75153000 |
| C  | 2.99965400  | -1.55962200 | 0.41650800  |
| C  | 3.06056000  | -0.92995700 | 1.65837700  |
| H  | 3.51469300  | 0.89530200  | 2.71746200  |
| H  | 4.15706800  | 2.12749500  | 0.64706800  |
| H  | 4.07076800  | 0.99121800  | -1.54532100 |
| H  | 2.66992300  | -2.59113200 | 0.35132200  |
| H  | 2.77828900  | -1.47655800 | 2.55394900  |
| Ni | -2.55450400 | -2.29745200 | -0.92961400 |
| C  | -6.00266300 | -0.48100800 | -2.00797200 |
| C  | -4.85404000 | -0.29822200 | -2.76856600 |
| C  | -3.90949000 | -1.32451500 | -2.92360200 |
| C  | -4.10803300 | -2.59246000 | -2.31756300 |
| C  | -5.28243700 | -2.75551600 | -1.52102300 |
| C  | -6.19692500 | -1.73412500 | -1.37791500 |
| H  | -4.68829900 | 0.65184100  | -3.27037200 |

|    |              |             |             |
|----|--------------|-------------|-------------|
| H  | -3.07035400  | -1.16964800 | -3.59203300 |
| H  | -5.43701000  | -3.70330500 | -1.01434300 |
| H  | -7.07814900  | -1.88569300 | -0.76322600 |
| C  | -3.02698000  | -3.57137600 | -2.27186200 |
| C  | -1.99437000  | -3.67725800 | -3.39987500 |
| H  | -3.29754900  | -4.52264000 | -1.81410200 |
| H  | -1.90625900  | -4.72763000 | -3.69805200 |
| H  | -2.36151100  | -3.14380100 | -4.28696900 |
| C  | -6.86902900  | 1.44971200  | -0.56525700 |
| C  | -7.01879200  | 0.62641200  | -1.86997600 |
| H  | -6.92691300  | 1.30884400  | -2.72271400 |
| H  | -8.02677300  | 0.19772900  | -1.90997300 |
| H  | -5.82542400  | 1.78704400  | -0.52112200 |
| C  | -7.74722100  | 2.69494100  | -0.53570000 |
| C  | -8.84286600  | 2.88423800  | -1.38242500 |
| C  | -7.46351300  | 3.68760700  | 0.41308900  |
| C  | -9.63846100  | 4.03090800  | -1.29418500 |
| H  | -9.09489500  | 2.13983600  | -2.13002400 |
| C  | -8.23928400  | 4.83880500  | 0.51746500  |
| H  | -6.62485000  | 3.54978300  | 1.09059700  |
| C  | -9.32216100  | 4.99204300  | -0.34450300 |
| H  | -10.48542400 | 4.16574400  | -1.95725900 |
| H  | -8.00664600  | 5.59910400  | 1.25428500  |
| Br | -10.42430300 | 6.60522800  | -0.21280600 |
| C  | -7.53644200  | -1.07291200 | 2.88914800  |
| C  | -6.28430000  | -0.50219500 | 2.67023800  |
| C  | -6.08321000  | 0.33175800  | 1.56885700  |
| C  | -7.11687200  | 0.59356500  | 0.66867700  |
| C  | -8.37884700  | 0.03172100  | 0.90745000  |
| C  | -8.58701800  | -0.79815500 | 2.00715500  |
| H  | -7.69759000  | -1.72508800 | 3.74302800  |
| H  | -5.45317200  | -0.71641400 | 3.33109700  |
| H  | -5.10403300  | 0.76883700  | 1.40392300  |
| H  | -9.20245400  | 0.25129800  | 0.23252400  |

|   |             |             |             |
|---|-------------|-------------|-------------|
| H | -9.56971800 | -1.22884400 | 2.17941500  |
| O | -2.14018600 | -3.47207200 | 0.51971500  |
| C | -1.10352500 | -4.44697200 | 0.45642700  |
| C | 0.30479400  | -3.87395700 | 0.50637500  |
| H | -1.24845900 | -5.00006900 | -0.47909700 |
| H | -1.25443500 | -5.15240200 | 1.28273300  |
| H | 1.03826400  | -4.66941900 | 0.32392100  |
| H | 0.43162700  | -3.11009800 | -0.26265700 |
| H | 0.49636000  | -3.42783600 | 1.48399400  |
| C | -1.02773400 | 1.30457000  | -0.39843600 |
| C | -0.10545400 | 0.57980800  | 0.37568400  |
| C | -0.51135500 | -0.55572300 | 1.06481500  |
| C | -1.84893700 | -1.00800600 | 1.03173400  |
| C | -2.76640900 | -0.24669900 | 0.26790500  |
| C | -2.35429900 | 0.89509200  | -0.44925500 |
| H | -0.70537500 | 2.18867500  | -0.94273100 |
| H | 0.93086500  | 0.90112300  | 0.42953000  |
| H | 0.21057700  | -1.10619700 | 1.65677400  |
| H | -3.81955400 | -0.51442000 | 0.29512700  |
| H | -3.08295500 | 1.45607600  | -1.02900100 |
| C | -1.98975500 | -3.78871800 | 3.69951500  |
| C | -4.23484800 | -3.44726600 | 2.71489700  |
| C | -3.47981700 | -3.60670200 | 4.04850800  |
| H | -1.85661100 | -4.78728800 | 3.24811900  |
| H | -5.30217500 | -3.26772400 | 2.89938200  |
| B | -2.31579600 | -2.39888900 | 1.73120300  |
| O | -1.49161300 | -2.78598000 | 2.83692100  |
| O | -3.73441000 | -2.36158900 | 1.97011100  |
| H | -1.38531000 | -3.76886700 | 4.61643200  |
| H | -4.15016600 | -4.38291800 | 2.13520900  |
| C | -3.98745100 | -4.84750900 | 4.78889100  |
| H | -3.88346500 | -5.75093700 | 4.17514600  |
| H | -3.43007700 | -5.00761600 | 5.72017100  |
| H | -5.04720200 | -4.73982200 | 5.05108200  |

|   |             |             |            |
|---|-------------|-------------|------------|
| C | -3.66712000 | -2.35336000 | 4.91442800 |
| H | -4.72903100 | -2.18909800 | 5.13786600 |
| H | -3.13654100 | -2.45661900 | 5.86896100 |
| H | -3.28024400 | -1.46868300 | 4.40268200 |

#### TS4e

SCF Energy (a.u.) = -3183.136846

Thermal correction to Gibbs free energy (a.u.) = 1.112203

Charge = 0, Multiplicity = 1

|   |             |             |             |
|---|-------------|-------------|-------------|
| C | 10.96984800 | 1.37516000  | -0.53353500 |
| C | 11.76990800 | 1.90066800  | -1.55864500 |
| C | 12.75157700 | 2.84770700  | -1.29382000 |
| C | 12.97322300 | 3.30968100  | 0.01589000  |
| C | 12.17051200 | 2.77997100  | 1.03868800  |
| C | 11.18701800 | 1.83189800  | 0.77014100  |
| H | 11.61748800 | 1.55830300  | -2.58000000 |
| H | 13.35444100 | 3.23051400  | -2.11166500 |
| H | 12.32040100 | 3.12247300  | 2.05971400  |
| H | 10.56782400 | 1.45275400  | 1.57823000  |
| C | 13.99561200 | 4.30932000  | 0.35494100  |
| C | 14.85041800 | 4.91454800  | -0.47914000 |
| H | 14.03970600 | 4.56830600  | 1.41276800  |
| H | 15.56677300 | 5.64294800  | -0.11248000 |
| H | 14.87337300 | 4.71260400  | -1.54647400 |
| C | 8.55281800  | 1.13310100  | -1.26701100 |
| C | 9.86005700  | 0.40458600  | -0.84782100 |
| H | 10.15975000 | -0.26476800 | -1.66313000 |
| H | 9.65867200  | -0.21981600 | 0.02919800  |
| H | 8.82140200  | 1.81464900  | -2.08379100 |
| C | 7.47354500  | 0.19805100  | -1.78418300 |
| C | 6.49952300  | 0.70309500  | -2.65679900 |
| C | 7.35410600  | -1.13013200 | -1.36502400 |
| C | 5.42299700  | -0.07924800 | -3.06187100 |
| H | 6.57943600  | 1.73152600  | -3.00107100 |

|   |             |             |             |
|---|-------------|-------------|-------------|
| C | 6.26821900  | -1.91028000 | -1.76285300 |
| H | 8.09621800  | -1.56229100 | -0.70160200 |
| C | 5.27686500  | -1.39360200 | -2.59904100 |
| H | 4.67038300  | 0.34201100  | -3.72504200 |
| H | 6.17066600  | -2.92469600 | -1.38532100 |
| C | 7.19382000  | 3.55728500  | 2.06123800  |
| C | 7.91196100  | 4.13556000  | 1.01456000  |
| C | 8.32758300  | 3.35412500  | -0.06457900 |
| C | 8.03067100  | 1.98857600  | -0.11816100 |
| C | 7.30372500  | 1.41739200  | 0.93454800  |
| C | 6.89264400  | 2.19393400  | 2.01734500  |
| H | 6.87014800  | 4.16236800  | 2.90344100  |
| H | 8.15397300  | 5.19449200  | 1.03780200  |
| H | 8.90536100  | 3.80398000  | -0.86746200 |
| H | 7.04448500  | 0.36343500  | 0.89909000  |
| H | 6.33560000  | 1.73392800  | 2.82969200  |
| C | 2.84614800  | -1.67034700 | -1.97200000 |
| C | 4.01518500  | -2.17021700 | -2.87360400 |
| H | 3.70682400  | -2.06953900 | -3.92136600 |
| H | 4.19299100  | -3.23433700 | -2.68698000 |
| H | 2.70713300  | -0.60857800 | -2.20606800 |
| C | 1.53121300  | -2.36906500 | -2.26674400 |
| C | 0.34072800  | -1.64262100 | -2.27460800 |
| C | 1.45342700  | -3.75589500 | -2.48142000 |
| C | -0.90062900 | -2.27789700 | -2.44072300 |
| H | 0.36390900  | -0.56936100 | -2.11423900 |
| C | 0.22965100  | -4.39951400 | -2.62749800 |
| H | 2.36239200  | -4.34880800 | -2.51555600 |
| C | -0.97333600 | -3.68052100 | -2.59450000 |
| H | -1.79935100 | -1.67027800 | -2.52173000 |
| H | 0.19820000  | -5.47819800 | -2.75737400 |
| C | 3.96709600  | -1.81475300 | 2.22282300  |
| C | 4.17606800  | -0.65982100 | 1.46671000  |
| C | 3.81276500  | -0.62947900 | 0.12103100  |

|    |              |             |             |
|----|--------------|-------------|-------------|
| C  | 3.22661800   | -1.74280900 | -0.49471300 |
| C  | 3.03850100   | -2.90008300 | 0.26841200  |
| C  | 3.40403000   | -2.93773900 | 1.61526500  |
| H  | 4.24056600   | -1.83974100 | 3.27387900  |
| H  | 4.61511200   | 0.22392400  | 1.92021700  |
| H  | 3.98953200   | 0.27004800  | -0.46094200 |
| H  | 2.57227500   | -3.77155000 | -0.17779800 |
| H  | 3.23349700   | -3.84259700 | 2.19186000  |
| Ni | -1.85243700  | -2.76430700 | -0.27609400 |
| C  | -6.39727600  | -1.35257200 | -1.12615800 |
| C  | -5.59856600  | -1.42795600 | -2.27293500 |
| C  | -4.49938100  | -2.28046300 | -2.33629300 |
| C  | -4.15649500  | -3.11847800 | -1.25309800 |
| C  | -4.94870300  | -3.00474700 | -0.08529600 |
| C  | -6.03519100  | -2.14181500 | -0.02549200 |
| H  | -5.85283300  | -0.82274400 | -3.14107900 |
| H  | -3.92050500  | -2.31426500 | -3.25405400 |
| H  | -4.68676900  | -3.60221100 | 0.78203100  |
| H  | -6.61797600  | -2.07824200 | 0.88944400  |
| C  | -2.98995400  | -4.03003800 | -1.25527700 |
| C  | -2.31544200  | -4.38118100 | -2.58550500 |
| H  | -3.15061100  | -4.90232600 | -0.61896100 |
| H  | -2.15586100  | -5.46198000 | -2.66128500 |
| H  | -2.91881200  | -4.09736700 | -3.45735500 |
| C  | -7.25833400  | 1.02925500  | -0.79931400 |
| C  | -7.60734600  | -0.45154600 | -1.08850400 |
| H  | -8.13073900  | -0.50154600 | -2.05169800 |
| H  | -8.30518800  | -0.81115900 | -0.32370200 |
| H  | -6.50159500  | 1.32401000  | -1.53798000 |
| C  | -8.43650200  | 1.98060200  | -0.96107200 |
| C  | -9.76478200  | 1.55368900  | -1.04229100 |
| C  | -8.18111900  | 3.35904800  | -1.00280200 |
| C  | -10.81569800 | 2.46860600  | -1.16514900 |
| H  | -10.00306100 | 0.49608700  | -1.01298700 |

|    |              |             |             |
|----|--------------|-------------|-------------|
| C  | -9.20970600  | 4.28862100  | -1.12782800 |
| H  | -7.15537400  | 3.70994600  | -0.92402300 |
| C  | -10.51987900 | 3.82349300  | -1.20717700 |
| H  | -11.84159300 | 2.12378900  | -1.22726800 |
| H  | -8.99673700  | 5.35102900  | -1.16104300 |
| Br | -11.98109400 | 5.11701600  | -1.38254700 |
| C  | -5.42916100  | 1.38231900  | 3.10717600  |
| C  | -4.64504100  | 1.45273100  | 1.95656800  |
| C  | -5.24513900  | 1.35453300  | 0.70098800  |
| C  | -6.62443200  | 1.17744000  | 0.57538300  |
| C  | -7.40303300  | 1.10189400  | 1.73729400  |
| C  | -6.81053600  | 1.20280500  | 2.99478500  |
| H  | -4.96873400  | 1.47136400  | 4.08728700  |
| H  | -3.57078700  | 1.57333500  | 2.02811000  |
| H  | -4.63518700  | 1.40417000  | -0.19635600 |
| H  | -8.47987700  | 0.98031600  | 1.65363200  |
| H  | -7.42764700  | 1.14889400  | 3.88760000  |
| O  | -2.10964800  | -3.55468900 | 1.46593100  |
| C  | -1.43375000  | -4.79664100 | 1.75087900  |
| C  | -0.01640900  | -4.85966600 | 1.20297000  |
| H  | -2.05927100  | -5.57568500 | 1.30564600  |
| H  | -1.43587800  | -4.92271400 | 2.83732100  |
| H  | 0.41962800   | -5.84246200 | 1.42310300  |
| H  | -0.01400100  | -4.71737800 | 0.11687500  |
| H  | 0.60331100   | -4.08604600 | 1.65900900  |
| C  | -0.25544200  | 1.57483800  | 0.06263100  |
| C  | 0.63236600   | 0.61524500  | 0.55279500  |
| C  | 0.18923300   | -0.68860200 | 0.79639200  |
| C  | -1.14803000  | -1.06763100 | 0.58986200  |
| C  | -2.03170700  | -0.06394400 | 0.13209900  |
| C  | -1.59456400  | 1.23140900  | -0.15278600 |
| H  | 0.08740600   | 2.58748400  | -0.13495800 |
| H  | 1.66958000   | 0.87566600  | 0.73828500  |
| H  | 0.90045300   | -1.42285300 | 1.16068300  |

|   |             |             |             |
|---|-------------|-------------|-------------|
| H | -3.08485000 | -0.30395100 | 0.00868700  |
| H | -2.29468600 | 1.97950900  | -0.51909300 |
| C | -0.34751900 | -1.51457900 | 4.01996300  |
| C | -2.83652600 | -1.25638700 | 4.04175800  |
| C | -1.51319000 | -0.56541600 | 4.41089500  |
| H | -0.01812000 | -2.08289200 | 4.89819900  |
| H | -3.67856700 | -0.58160100 | 4.22282600  |
| B | -1.78522000 | -2.34771100 | 2.21785300  |
| O | -0.66827600 | -2.48442400 | 3.02856800  |
| O | -2.89211700 | -1.63216800 | 2.67301100  |
| H | 0.50877000  | -0.92774700 | 3.66273000  |
| H | -2.97560600 | -2.14498300 | 4.67836600  |
| C | -1.47753100 | -0.32405000 | 5.92723200  |
| H | -1.60146200 | -1.25949300 | 6.48601800  |
| H | -0.52303100 | 0.12437100  | 6.22822900  |
| H | -2.27556700 | 0.36295200  | 6.23315800  |
| C | -1.39689000 | 0.78113800  | 3.68050500  |
| H | -2.20196500 | 1.45632200  | 3.99532600  |
| H | -0.44262800 | 1.26680600  | 3.91541500  |
| H | -1.45446500 | 0.65819600  | 2.59950200  |

**im8e**

SCF Energy (a.u.) = -3183.156751

Thermal correction to Gibbs free energy (a.u.) = 1.108274

Charge = 0, Multiplicity = 1

|   |             |            |             |
|---|-------------|------------|-------------|
| C | 11.01088100 | 1.38252200 | -0.30365800 |
| C | 11.84726700 | 1.91405400 | -1.29621800 |
| C | 12.82868500 | 2.84821900 | -0.98831200 |
| C | 13.01374700 | 3.29052900 | 0.33383600  |
| C | 12.17510100 | 2.75460800 | 1.32401800  |
| C | 11.19181400 | 1.81964800 | 1.01218400  |
| H | 11.72327600 | 1.58703700 | -2.32640400 |
| H | 13.45996000 | 3.23640800 | -1.78184600 |
| H | 12.29612900 | 3.08220700 | 2.35374300  |

|   |             |             |             |
|---|-------------|-------------|-------------|
| H | 10.54389500 | 1.43598300  | 1.79521900  |
| C | 14.03380200 | 4.27614300  | 0.71785700  |
| C | 14.91887600 | 4.88534500  | -0.08106100 |
| H | 14.04765400 | 4.52011000  | 1.78009600  |
| H | 15.62975600 | 5.60224000  | 0.31757300  |
| H | 14.97269600 | 4.69815600  | -1.14997500 |
| C | 8.61746500  | 1.17148600  | -1.12356600 |
| C | 9.90264700  | 0.42698500  | -0.66532200 |
| H | 10.22426700 | -0.23841300 | -1.47554900 |
| H | 9.66404700  | -0.20261300 | 0.19854400  |
| H | 8.92107500  | 1.85733700  | -1.92449300 |
| C | 7.54987900  | 0.24970000  | -1.68725800 |
| C | 6.59831000  | 0.77566200  | -2.57187100 |
| C | 7.41930700  | -1.08776000 | -1.30233300 |
| C | 5.53275100  | 0.00365700  | -3.02301000 |
| H | 6.68602800  | 1.81234700  | -2.88845300 |
| C | 6.34559900  | -1.85852800 | -1.74833100 |
| H | 8.14307600  | -1.53570000 | -0.62921300 |
| C | 5.37615100  | -1.32194300 | -2.59771900 |
| H | 4.79672400  | 0.44159800  | -3.69392100 |
| H | 6.23914000  | -2.88146900 | -1.39766000 |
| C | 7.17502400  | 3.57848200  | 2.18157900  |
| C | 7.95527200  | 4.15327500  | 1.17818200  |
| C | 8.39669300  | 3.37805800  | 0.10504100  |
| C | 8.06466300  | 2.02227400  | 0.01436600  |
| C | 7.27419900  | 1.45511600  | 1.02238400  |
| C | 6.83704100  | 2.22572700  | 2.09929500  |
| H | 6.83067900  | 4.17873400  | 3.01910500  |
| H | 8.22521000  | 5.20442000  | 1.23064000  |
| H | 9.02191100  | 3.82439700  | -0.66353200 |
| H | 6.98368800  | 0.41099300  | 0.95552600  |
| H | 6.22956600  | 1.76869100  | 2.87629200  |
| C | 2.93815500  | -1.59723000 | -2.03298100 |
| C | 4.11983000  | -2.09018700 | -2.92022700 |

|    |             |             |             |
|----|-------------|-------------|-------------|
| H  | 3.83526700  | -1.96963700 | -3.97257200 |
| H  | 4.28851000  | -3.15872600 | -2.74977000 |
| H  | 2.79126800  | -0.53914400 | -2.27729100 |
| C  | 1.62834300  | -2.30314400 | -2.33729300 |
| C  | 0.45239100  | -1.56490000 | -2.41085500 |
| C  | 1.54050900  | -3.69621000 | -2.53082300 |
| C  | -0.79122500 | -2.17986200 | -2.65068400 |
| H  | 0.48228100  | -0.49132900 | -2.25627500 |
| C  | 0.31978900  | -4.32127300 | -2.74933900 |
| H  | 2.44144100  | -4.30224200 | -2.51251900 |
| C  | -0.87333500 | -3.58093700 | -2.82379700 |
| H  | -1.65903500 | -1.55128300 | -2.83185600 |
| H  | 0.28018700  | -5.39940700 | -2.88285700 |
| C  | 4.16021000  | -1.70547700 | 2.12761700  |
| C  | 4.12062300  | -0.49879900 | 1.42788500  |
| C  | 3.70343700  | -0.47519400 | 0.09730400  |
| C  | 3.32197500  | -1.64957000 | -0.55908000 |
| C  | 3.37605400  | -2.85559300 | 0.14839400  |
| C  | 3.78713600  | -2.88551700 | 1.48110700  |
| H  | 4.47885000  | -1.72748200 | 3.16599200  |
| H  | 4.41037100  | 0.42869400  | 1.91286800  |
| H  | 3.68306100  | 0.46678500  | -0.44213100 |
| H  | 3.08372000  | -3.78037600 | -0.33795200 |
| H  | 3.81313300  | -3.83164200 | 2.01491100  |
| Ni | -1.84847100 | -2.66042600 | -0.64568400 |
| C  | -6.21933800 | -1.23958100 | -1.18516100 |
| C  | -5.38943500 | -1.17963500 | -2.31237400 |
| C  | -4.34046900 | -2.07622400 | -2.49066300 |
| C  | -4.07307000 | -3.10034200 | -1.54779500 |
| C  | -4.90978500 | -3.13235000 | -0.40440300 |
| C  | -5.94645100 | -2.22660100 | -0.22927000 |
| H  | -5.58094700 | -0.42976700 | -3.07768800 |
| H  | -3.74045700 | -2.00287900 | -3.39231100 |
| H  | -4.72295200 | -3.88627400 | 0.35239000  |

|    |              |             |             |
|----|--------------|-------------|-------------|
| H  | -6.56516500  | -2.28858300 | 0.66269500  |
| C  | -2.93506000  | -4.01825700 | -1.64090300 |
| C  | -2.22514800  | -4.24831000 | -2.97216000 |
| H  | -3.06012000  | -4.92397400 | -1.04630300 |
| H  | -2.08917300  | -5.31725400 | -3.17053400 |
| H  | -2.77482800  | -3.83922500 | -3.83019600 |
| C  | -6.98928600  | 1.15856300  | -0.71906400 |
| C  | -7.39168300  | -0.29961000 | -1.04219500 |
| H  | -7.96359600  | -0.29165800 | -1.97920300 |
| H  | -8.06593400  | -0.67426300 | -0.26362800 |
| H  | -6.19328800  | 1.43162200  | -1.42267400 |
| C  | -8.12243400  | 2.15866000  | -0.91730800 |
| C  | -9.47153800  | 1.79205000  | -0.92488000 |
| C  | -7.80485300  | 3.51644600  | -1.05990300 |
| C  | -10.48242400 | 2.74659800  | -1.07236100 |
| H  | -9.75614800  | 0.75064600  | -0.81877500 |
| C  | -8.79374400  | 4.48521300  | -1.21099200 |
| H  | -6.76181500  | 3.82201200  | -1.04201500 |
| C  | -10.12575100 | 4.08044900  | -1.21395100 |
| H  | -11.52483700 | 2.44896800  | -1.07784100 |
| H  | -8.53301800  | 5.53141100  | -1.32345300 |
| Br | -11.53121900 | 5.42885500  | -1.42538400 |
| C  | -5.38167100  | 1.72461000  | 3.26437900  |
| C  | -4.55513100  | 1.85721700  | 2.14873900  |
| C  | -5.07265600  | 1.64680300  | 0.86929200  |
| C  | -6.41485500  | 1.30778800  | 0.68370500  |
| C  | -7.23133100  | 1.15648000  | 1.81263100  |
| C  | -6.72052300  | 1.36032900  | 3.09305300  |
| H  | -4.98693000  | 1.90288800  | 4.26091100  |
| H  | -3.50683700  | 2.11235600  | 2.26354200  |
| H  | -4.42709100  | 1.75164800  | 0.00329600  |
| H  | -8.28176600  | 0.90823600  | 1.68527600  |
| H  | -7.37038800  | 1.25106400  | 3.95707300  |
| O  | -1.93247300  | -3.76063400 | 1.09045400  |

|   |             |             |             |
|---|-------------|-------------|-------------|
| C | -1.02148100 | -4.87988000 | 1.16246100  |
| C | 0.42645400  | -4.44113600 | 1.07112100  |
| H | -1.29085500 | -5.52288800 | 0.32093200  |
| H | -1.21568300 | -5.41414000 | 2.09640400  |
| H | 1.07887200  | -5.32278900 | 1.06864600  |
| H | 0.60114300  | -3.88291100 | 0.14798400  |
| H | 0.69709000  | -3.80811500 | 1.91927800  |
| C | -0.29081900 | 1.52745900  | 1.07032300  |
| C | 0.50141300  | 0.39704600  | 1.27450100  |
| C | 0.07411700  | -0.85364800 | 0.81396100  |
| C | -1.15376600 | -1.03104900 | 0.15044000  |
| C | -1.93638200 | 0.12891100  | -0.02924500 |
| C | -1.51357500 | 1.38815300  | 0.40864300  |
| H | 0.04112100  | 2.50388100  | 1.41507400  |
| H | 1.45794500  | 0.48359700  | 1.78259600  |
| H | 0.73821200  | -1.69994600 | 0.96264500  |
| H | -2.90189700 | 0.04708700  | -0.52701200 |
| H | -2.13313000 | 2.26559700  | 0.22994000  |
| C | -2.16376300 | -2.75826500 | 4.61865300  |
| C | -3.96531900 | -1.67652500 | 3.30341400  |
| C | -2.89134000 | -1.42768600 | 4.37287900  |
| H | -2.83984100 | -3.47933300 | 5.09821300  |
| H | -4.40333700 | -0.73689900 | 2.96429900  |
| B | -2.34170400 | -3.11171900 | 2.25187800  |
| O | -1.66338600 | -3.34829000 | 3.41128100  |
| O | -3.44384800 | -2.33414000 | 2.14741800  |
| H | -1.30307300 | -2.61030400 | 5.27865800  |
| H | -4.77087900 | -2.30121200 | 3.71427100  |
| C | -3.57509000 | -0.98616600 | 5.67327600  |
| H | -4.26975100 | -1.74859100 | 6.04638000  |
| H | -2.83390600 | -0.78867900 | 6.45630700  |
| H | -4.14319500 | -0.06382300 | 5.51125700  |
| C | -1.90230400 | -0.35174400 | 3.89911600  |
| H | -2.41821200 | 0.60298300  | 3.76208000  |

|   |             |             |            |
|---|-------------|-------------|------------|
| H | -1.10801600 | -0.20685700 | 4.64102800 |
| H | -1.43252300 | -0.60597800 | 2.94754700 |

**im9e**

SCF Energy (a.u.) = -2968.736859

Thermal correction to Gibbs free energy (a.u.) = 1.070439

Charge = 0, Multiplicity = 1

|   |             |             |             |
|---|-------------|-------------|-------------|
| C | 10.97523300 | 1.59376700  | -0.06231000 |
| C | 11.87304000 | 2.06099800  | -1.03335500 |
| C | 12.87673200 | 2.96634000  | -0.71154200 |
| C | 13.02331100 | 3.44316100  | 0.60344500  |
| C | 12.12323700 | 2.97146900  | 1.57212000  |
| C | 11.11777500 | 2.06527500  | 1.24631800  |
| H | 11.77993100 | 1.70609600  | -2.05754600 |
| H | 13.55586100 | 3.30445200  | -1.48828700 |
| H | 12.21385900 | 3.32660900  | 2.59581600  |
| H | 10.42300200 | 1.73147000  | 2.01186600  |
| C | 14.06462400 | 4.40065900  | 1.00135800  |
| C | 15.00592500 | 4.94962200  | 0.22334300  |
| H | 14.04361400 | 4.67750000  | 2.05537900  |
| H | 15.72748300 | 5.65088900  | 0.63047900  |
| H | 15.09714200 | 4.72645700  | -0.83608200 |
| C | 8.61427400  | 1.44786900  | -0.98464300 |
| C | 9.84627600  | 0.67029100  | -0.44260400 |
| H | 10.17623900 | -0.03539800 | -1.21445700 |
| H | 9.54380000  | 0.08135900  | 0.42988900  |
| H | 8.98110200  | 2.09240100  | -1.79335900 |
| C | 7.53613100  | 0.54917100  | -1.56487500 |
| C | 6.64965900  | 1.07820200  | -2.51300300 |
| C | 7.33004300  | -0.76503600 | -1.13565400 |
| C | 5.57107700  | 0.33493900  | -2.98155100 |
| H | 6.79809300  | 2.09598600  | -2.86627400 |
| C | 6.24336300  | -1.50657100 | -1.59953900 |
| H | 8.00327400  | -1.21588500 | -0.41381900 |

|   |             |             |             |
|---|-------------|-------------|-------------|
| C | 5.33579600  | -0.96351500 | -2.51096500 |
| H | 4.88619700  | 0.77591400  | -3.70278900 |
| H | 6.07658200  | -2.50920000 | -1.21530600 |
| C | 7.12607700  | 4.02568800  | 2.16854100  |
| C | 7.97780600  | 4.53168700  | 1.18640700  |
| C | 8.43400800  | 3.70210200  | 0.16118200  |
| C | 8.04598700  | 2.35963200  | 0.09732400  |
| C | 7.18371400  | 1.86203900  | 1.08310200  |
| C | 6.73167600  | 2.68694500  | 2.11265800  |
| H | 6.77095500  | 4.66818000  | 2.96946100  |
| H | 8.29259200  | 5.57109500  | 1.21884200  |
| H | 9.11472800  | 4.09446600  | -0.58943200 |
| H | 6.85067800  | 0.82958300  | 1.03605700  |
| H | 6.06952400  | 2.28267500  | 2.87413600  |
| C | 2.87529400  | -1.08928000 | -2.04436000 |
| C | 4.05775800  | -1.68843900 | -2.85125200 |
| H | 3.82557700  | -1.61600700 | -3.92083800 |
| H | 4.16629900  | -2.75150000 | -2.61221900 |
| H | 2.79157000  | -0.03794000 | -2.34699300 |
| C | 1.53029400  | -1.75002200 | -2.29028000 |
| C | 0.37279300  | -1.04875300 | -1.93192600 |
| C | 1.37896100  | -3.06733400 | -2.73189200 |
| C | -0.87594300 | -1.66148900 | -1.93383900 |
| H | 0.46167300  | -0.01505200 | -1.60375700 |
| C | 0.12102100  | -3.67335700 | -2.75197800 |
| H | 2.24503700  | -3.64529900 | -3.03927800 |
| C | -1.02774200 | -3.00093100 | -2.31980900 |
| H | -1.73630600 | -1.09402400 | -1.60642900 |
| H | 0.03668300  | -4.71078500 | -3.06457000 |
| C | 3.82730800  | -1.11490300 | 2.18881300  |
| C | 3.88898600  | 0.07405300  | 1.46067500  |
| C | 3.57379300  | 0.07954000  | 0.10067100  |
| C | 3.18723000  | -1.09551500 | -0.55055600 |
| C | 3.12665100  | -2.28344700 | 0.18943400  |

|    |              |             |             |
|----|--------------|-------------|-------------|
| C  | 3.44712800   | -2.29620100 | 1.54624800  |
| H  | 4.07357300   | -1.12327300 | 3.24693800  |
| H  | 4.18769400   | 0.99986800  | 1.94368600  |
| H  | 3.64965200   | 1.00310900  | -0.46624600 |
| H  | 2.81356200   | -3.20179500 | -0.29985600 |
| H  | 3.39164000   | -3.22690200 | 2.10427900  |
| Ni | -2.11196600  | -3.18069800 | 0.58237500  |
| C  | -6.50467600  | -0.64235300 | -1.36525100 |
| C  | -5.34985200  | -0.49133200 | -2.13772600 |
| C  | -4.29806100  | -1.40486900 | -2.05828600 |
| C  | -4.34936900  | -2.51252600 | -1.19207100 |
| C  | -5.54327600  | -2.67964500 | -0.46050200 |
| C  | -6.58738900  | -1.76574100 | -0.53312500 |
| H  | -5.26946600  | 0.35325100  | -2.81981000 |
| H  | -3.43680100  | -1.26157500 | -2.70135700 |
| H  | -5.63709800  | -3.54858900 | 0.18829400  |
| H  | -7.47953900  | -1.91788700 | 0.06918900  |
| C  | -3.24893700  | -3.50934900 | -1.02583900 |
| C  | -2.35577000  | -3.73120800 | -2.26870800 |
| H  | -3.72369600  | -4.46410900 | -0.78933600 |
| H  | -2.13067700  | -4.80023700 | -2.32100800 |
| H  | -2.93036900  | -3.49632700 | -3.17925700 |
| C  | -7.21855100  | 1.65199700  | -0.56306000 |
| C  | -7.59792300  | 0.39587400  | -1.38713500 |
| H  | -7.80914700  | 0.70693400  | -2.41802900 |
| H  | -8.52109700  | -0.03628900 | -0.98418600 |
| H  | -6.29319100  | 2.04541100  | -1.00395400 |
| C  | -8.25342800  | 2.76892600  | -0.62235800 |
| C  | -9.52087600  | 2.61425100  | -1.19006600 |
| C  | -7.92611100  | 4.01378500  | -0.06437700 |
| C  | -10.44234800 | 3.66668700  | -1.20771300 |
| H  | -9.81209400  | 1.66811900  | -1.63250000 |
| C  | -8.82488200  | 5.07645700  | -0.07278300 |
| H  | -6.95086300  | 4.14774200  | 0.39632100  |

|    |              |             |             |
|----|--------------|-------------|-------------|
| C  | -10.07823200 | 4.88294100  | -0.64840500 |
| H  | -11.42233900 | 3.53266000  | -1.65137800 |
| H  | -8.55708700  | 6.03319300  | 0.36093700  |
| Br | -11.35738600 | 6.36609000  | -0.66625100 |
| C  | -6.30863200  | 0.53678800  | 3.52353400  |
| C  | -5.28270100  | 0.88684500  | 2.64648200  |
| C  | -5.57913100  | 1.24841800  | 1.33095900  |
| C  | -6.90049000  | 1.28024900  | 0.87821600  |
| C  | -7.92512100  | 0.93252500  | 1.76793000  |
| C  | -7.63322700  | 0.55704100  | 3.07774500  |
| H  | -6.08166200  | 0.25651200  | 4.54848800  |
| H  | -4.24929100  | 0.87581700  | 2.97943400  |
| H  | -4.77446500  | 1.49696500  | 0.64439100  |
| H  | -8.95831700  | 0.96961300  | 1.43259600  |
| H  | -8.43970500  | 0.29024800  | 3.75521800  |
| C  | -0.79734300  | -7.71445800 | 0.57586600  |
| C  | 0.09135900   | -6.74689100 | 0.10475200  |
| C  | -0.29549300  | -5.40496300 | 0.03694500  |
| C  | -1.58021000  | -4.99065400 | 0.42553700  |
| C  | -2.46438300  | -5.98454800 | 0.88139900  |
| C  | -2.07969700  | -7.32610400 | 0.96743400  |
| H  | -0.49708100  | -8.75746800 | 0.63166800  |
| H  | 1.09123100   | -7.03532800 | -0.21355600 |
| H  | 0.41410500   | -4.67894300 | -0.34810500 |
| H  | -3.47639400  | -5.71190100 | 1.17657200  |
| H  | -2.78618000  | -8.06850400 | 1.33257700  |
| C  | -2.52557400  | -0.89113500 | 1.10146000  |
| C  | -3.36369300  | -1.72138400 | 1.78373600  |
| C  | -3.25445800  | -2.21651600 | 3.20593600  |
| C  | -1.81822000  | -2.41967200 | 3.73214700  |
| C  | -0.95155000  | -3.14808500 | 2.73372700  |
| C  | -0.16690300  | -2.55878800 | 1.79571600  |
| C  | 0.01523700   | -1.08172700 | 1.55381200  |
| C  | -1.27452600  | -0.22530100 | 1.63827000  |

|   |             |             |            |
|---|-------------|-------------|------------|
| H | -2.87911000 | -0.55823300 | 0.12937100 |
| H | -4.31808300 | -1.93092000 | 1.31544100 |
| H | -3.78880200 | -3.17271100 | 3.26261700 |
| H | -3.80279400 | -1.52762500 | 3.86652900 |
| H | -1.36868100 | -1.45891900 | 3.99569400 |
| H | -1.86737500 | -3.00274500 | 4.65857500 |
| H | -0.91304500 | -4.23036000 | 2.82047900 |
| H | 0.48708200  | -3.20287900 | 1.21663300 |
| H | 0.45060600  | -0.97103900 | 0.56089500 |
| H | 0.76579400  | -0.68323700 | 2.25082600 |
| H | -1.44937000 | 0.08909800  | 2.67210700 |
| H | -1.10192400 | 0.69647800  | 1.07120100 |

### TS5e

SCF Energy (a.u.) = -2968.704027

Thermal correction to Gibbs free energy (a.u.) = 1.070301

Charge = 0, Multiplicity = 1

|   |             |            |             |
|---|-------------|------------|-------------|
| C | 10.98195000 | 1.44709800 | -0.07358100 |
| C | 11.87056000 | 1.92704600 | -1.04684600 |
| C | 12.87055400 | 2.83641800 | -0.72480300 |
| C | 13.02243200 | 3.30466900 | 0.59264200  |
| C | 12.13163000 | 2.82013600 | 1.56356100  |
| C | 11.12987700 | 1.90993800 | 1.23756400  |
| H | 11.77310800 | 1.57906500 | -2.07301200 |
| H | 13.54256700 | 3.18449300 | -1.50333900 |
| H | 12.22644800 | 3.16847700 | 2.58920500  |
| H | 10.44205300 | 1.56632900 | 2.00503100  |
| C | 14.05993100 | 4.26615800 | 0.99090300  |
| C | 14.99195400 | 4.82779800 | 0.21076900  |
| H | 14.04431500 | 4.53460300 | 2.04718500  |
| H | 15.71145300 | 5.53086000 | 0.61845400  |
| H | 15.07724200 | 4.61372700 | -0.85102700 |
| C | 8.61519900  | 1.29476000 | -0.97843100 |
| C | 9.85597400  | 0.51972200 | -0.45341800 |

|   |             |             |             |
|---|-------------|-------------|-------------|
| H | 10.18432800 | -0.17690300 | -1.23416500 |
| H | 9.56404600  | -0.07889900 | 0.41607500  |
| H | 8.97137600  | 1.94774000  | -1.78513800 |
| C | 7.53609900  | 0.39547900  | -1.55616700 |
| C | 6.63556400  | 0.92977000  | -2.48800300 |
| C | 7.34276200  | -0.92462100 | -1.13930700 |
| C | 5.55627900  | 0.18516700  | -2.95264900 |
| H | 6.77359500  | 1.95246700  | -2.83109100 |
| C | 6.25524600  | -1.66761800 | -1.59897200 |
| H | 8.02661300  | -1.37918000 | -0.42992000 |
| C | 5.33446000  | -1.11992000 | -2.49409200 |
| H | 4.86046600  | 0.63000400  | -3.66096200 |
| H | 6.09812800  | -2.67503700 | -1.22331600 |
| C | 7.13903600  | 3.83871300  | 2.20740600  |
| C | 7.97414300  | 4.35916400  | 1.21861600  |
| C | 8.42668400  | 3.54039100  | 0.18308200  |
| C | 8.05135100  | 2.19459600  | 0.11568300  |
| C | 7.20603100  | 1.68224200  | 1.10855400  |
| C | 6.75762900  | 2.49631600  | 2.14821200  |
| H | 6.78654900  | 4.47279600  | 3.01612100  |
| H | 8.27874600  | 5.40151300  | 1.25373900  |
| H | 9.09467900  | 3.94402500  | -0.57299300 |
| H | 6.88324700  | 0.64660400  | 1.05916400  |
| H | 6.10832900  | 2.08119500  | 2.91488800  |
| C | 2.87923200  | -1.27530500 | -2.00100500 |
| C | 4.05836100  | -1.84947300 | -2.83105500 |
| H | 3.81561600  | -1.76039000 | -3.89720600 |
| H | 4.17717700  | -2.91571400 | -2.61046900 |
| H | 2.78858500  | -0.21756200 | -2.27904000 |
| C | 1.53532700  | -1.93356700 | -2.26557700 |
| C | 0.37945000  | -1.28634000 | -1.81448600 |
| C | 1.38549800  | -3.19036600 | -2.85879900 |
| C | -0.87334800 | -1.88644300 | -1.89987300 |
| H | 0.46652800  | -0.30133000 | -1.36332900 |

|    |             |             |             |
|----|-------------|-------------|-------------|
| C  | 0.12523700  | -3.78204400 | -2.96689700 |
| H  | 2.25120400  | -3.72640500 | -3.23410600 |
| C  | -1.02590100 | -3.15561500 | -2.47576500 |
| H  | -1.73123500 | -1.35542200 | -1.51028900 |
| H  | 0.03835200  | -4.76534700 | -3.42376700 |
| C  | 3.88128800  | -1.39857400 | 2.21521700  |
| C  | 3.96082600  | -0.19805200 | 1.50836500  |
| C  | 3.62702100  | -0.16003300 | 0.15377100  |
| C  | 3.20491100  | -1.31473100 | -0.51207200 |
| C  | 3.12742300  | -2.51450000 | 0.20580900  |
| C  | 3.46451600  | -2.55868700 | 1.55787200  |
| H  | 4.13821600  | -1.43125400 | 3.27026600  |
| H  | 4.28388800  | 0.71228100  | 2.00481900  |
| H  | 3.71487700  | 0.77202100  | -0.39725700 |
| H  | 2.78367600  | -3.41522600 | -0.29569100 |
| H  | 3.38988600  | -3.49616600 | 2.10173200  |
| Ni | -2.35652400 | -2.82378700 | 0.41531900  |
| C  | -6.34551600 | -0.65323400 | -1.33950500 |
| C  | -5.17994900 | -0.51263700 | -2.10027800 |
| C  | -4.19965400 | -1.50188600 | -2.12361900 |
| C  | -4.33075900 | -2.68368500 | -1.36710500 |
| C  | -5.53772500 | -2.84196400 | -0.65281800 |
| C  | -6.50503700 | -1.84448200 | -0.62051300 |
| H  | -5.04176100 | 0.37975600  | -2.70802700 |
| H  | -3.33423800 | -1.35662100 | -2.75926100 |
| H  | -5.71316700 | -3.76578400 | -0.10977800 |
| H  | -7.41118300 | -1.99784000 | -0.03945200 |
| C  | -3.33540200 | -3.81246700 | -1.39616500 |
| C  | -2.36309800 | -3.86077000 | -2.58673200 |
| H  | -3.93328600 | -4.72091300 | -1.45036000 |
| H  | -2.15551300 | -4.91556100 | -2.79260200 |
| H  | -2.89922200 | -3.48460500 | -3.47077200 |
| C  | -6.95281900 | 1.68506200  | -0.53322500 |
| C  | -7.39695800 | 0.42859100  | -1.31768700 |

|    |              |             |             |
|----|--------------|-------------|-------------|
| H  | -7.64323000  | 0.73240700  | -2.34364500 |
| H  | -8.31658800  | 0.02941400  | -0.87489000 |
| H  | -6.01618000  | 2.02856400  | -0.99119600 |
| C  | -7.94052600  | 2.84369900  | -0.61464100 |
| C  | -9.23739000  | 2.71464900  | -1.11903200 |
| C  | -7.53826700  | 4.10015500  | -0.13820000 |
| C  | -10.11494000 | 3.80341200  | -1.15403500 |
| H  | -9.58641600  | 1.76031000  | -1.49758100 |
| C  | -8.39234300  | 5.19887600  | -0.16550900 |
| H  | -6.53915000  | 4.21536900  | 0.27391300  |
| C  | -9.67671500  | 5.03014700  | -0.67669000 |
| H  | -11.11834900 | 3.68918300  | -1.54817100 |
| H  | -8.06664000  | 6.16427100  | 0.20476100  |
| Br | -10.89361200 | 6.56467200  | -0.72118100 |
| C  | -6.06667800  | 0.74203700  | 3.60095000  |
| C  | -5.04139100  | 1.10395700  | 2.72890100  |
| C  | -5.32955000  | 1.40128300  | 1.39540000  |
| C  | -6.64103500  | 1.35276600  | 0.91880000  |
| C  | -7.66609700  | 0.99179500  | 1.80338500  |
| C  | -7.38241400  | 0.68262300  | 3.13169200  |
| H  | -5.84611100  | 0.50970900  | 4.63906100  |
| H  | -4.01350500  | 1.14442800  | 3.07624700  |
| H  | -4.52277600  | 1.66059000  | 0.71554800  |
| H  | -8.69395200  | 0.96976000  | 1.45041300  |
| H  | -8.18848000  | 0.40515100  | 3.80543600  |
| C  | -1.96396500  | -7.06041700 | 1.55717600  |
| C  | -1.07267700  | -6.60647300 | 0.57979600  |
| C  | -1.33106900  | -5.44044600 | -0.13920900 |
| C  | -2.48657100  | -4.67040000 | 0.12430200  |
| C  | -3.41566800  | -5.18419000 | 1.06620000  |
| C  | -3.14094300  | -6.34142600 | 1.79027700  |
| H  | -1.75442400  | -7.96920100 | 2.11372100  |
| H  | -0.15707700  | -7.16016500 | 0.38365600  |
| H  | -0.60288000  | -5.08998700 | -0.86114100 |

|   |             |             |            |
|---|-------------|-------------|------------|
| H | -4.34394800 | -4.65153600 | 1.24826100 |
| H | -3.85419000 | -6.69130800 | 2.53308200 |
| C | -2.38971600 | -0.71987100 | 1.04247200 |
| C | -3.34254700 | -1.52000400 | 1.65256600 |
| C | -3.30527000 | -2.07512000 | 3.06332200 |
| C | -1.91054000 | -2.45956300 | 3.62007300 |
| C | -1.06441000 | -3.21170100 | 2.62401100 |
| C | -0.19436900 | -2.63938800 | 1.76586700 |
| C | 0.11507500  | -1.16758900 | 1.65357900 |
| C | -1.11109200 | -0.20969500 | 1.68339200 |
| H | -2.71124300 | -0.20102400 | 0.14135100 |
| H | -4.33676000 | -1.51642900 | 1.21202600 |
| H | -3.94691600 | -2.96369800 | 3.08460300 |
| H | -3.77454100 | -1.35068700 | 3.74718400 |
| H | -1.38355500 | -1.56312200 | 3.95754300 |
| H | -2.06172700 | -3.07987900 | 4.51145600 |
| H | -1.17338200 | -4.29275100 | 2.60563700 |
| H | 0.37629400  | -3.29367900 | 1.11068000 |
| H | 0.65795000  | -1.02022600 | 0.72026200 |
| H | 0.81583100  | -0.86869400 | 2.44568600 |
| H | -1.32207400 | 0.07820600  | 2.71967300 |
| H | -0.81556300 | 0.71773400  | 1.17797300 |

**im10e**

SCF Energy (a.u.) = -2968.748082

Thermal correction to Gibbs free energy (a.u.) = 1.072292

Charge = 0, Multiplicity = 1

|   |             |            |             |
|---|-------------|------------|-------------|
| C | 10.88539200 | 1.47953000 | -0.31332300 |
| C | 11.69022000 | 2.13844000 | -1.25420600 |
| C | 12.69418800 | 3.01347900 | -0.85790800 |
| C | 12.93442300 | 3.26572200 | 0.50466500  |
| C | 12.12725200 | 2.60265400 | 1.44266400  |
| C | 11.12134400 | 1.72731300 | 1.04248600  |
| H | 11.52355400 | 1.95908000 | -2.31423600 |

|   |             |             |             |
|---|-------------|-------------|-------------|
| H | 13.30018100 | 3.50374600  | -1.61375100 |
| H | 12.29122300 | 2.78232900  | 2.50243500  |
| H | 10.49886800 | 1.24254100  | 1.78926100  |
| C | 13.98025400 | 4.18106300  | 0.98198000  |
| C | 14.83921900 | 4.89282400  | 0.24149900  |
| H | 14.03952800 | 4.27157000  | 2.06657000  |
| H | 15.57374800 | 5.54172700  | 0.70795400  |
| H | 14.84768700 | 4.85940200  | -0.84447100 |
| C | 8.45989700  | 1.40301400  | -1.05693900 |
| C | 9.75222400  | 0.59190600  | -0.76071200 |
| H | 10.03335200 | 0.04536600  | -1.66895500 |
| H | 9.53985600  | -0.15178800 | 0.01481300  |
| H | 8.74047400  | 2.19255000  | -1.76538400 |
| C | 7.35805800  | 0.57818900  | -1.69929900 |
| C | 6.38180700  | 1.23021700  | -2.46512800 |
| C | 7.22080600  | -0.79781200 | -1.49496600 |
| C | 5.28667000  | 0.53870100  | -2.97287800 |
| H | 6.47464300  | 2.29922900  | -2.64195500 |
| C | 6.11756800  | -1.48860000 | -1.99651000 |
| H | 7.96291800  | -1.34120700 | -0.91916500 |
| C | 5.12443500  | -0.83037400 | -2.72414200 |
| H | 4.53303700  | 1.07187500  | -3.54863800 |
| H | 6.00726000  | -2.54842400 | -1.78351200 |
| C | 7.17786000  | 3.33190300  | 2.60845900  |
| C | 7.91783900  | 4.03917100  | 1.66080400  |
| C | 8.30767700  | 3.41917600  | 0.47283000  |
| C | 7.96313900  | 2.08916900  | 0.21068500  |
| C | 7.21344000  | 1.38869100  | 1.16468100  |
| C | 6.82810900  | 2.00341800  | 2.35557300  |
| H | 6.87420400  | 3.81087200  | 3.53510200  |
| H | 8.19695500  | 5.07276400  | 1.84599400  |
| H | 8.90246400  | 3.96681900  | -0.25322500 |
| H | 6.91472600  | 0.36344300  | 0.96762600  |
| H | 6.25271100  | 1.44377400  | 3.08866900  |

|    |             |             |             |
|----|-------------|-------------|-------------|
| C  | 2.70705100  | -1.15945300 | -2.11265800 |
| C  | 3.84588000  | -1.53637600 | -3.09829800 |
| H  | 3.53237500  | -1.27422700 | -4.11648600 |
| H  | 4.00333600  | -2.62026600 | -3.07296500 |
| H  | 2.56371300  | -0.07464300 | -2.20223700 |
| C  | 1.37287200  | -1.82573600 | -2.41003300 |
| C  | 0.25145700  | -1.42038400 | -1.67588500 |
| C  | 1.20712500  | -2.87446700 | -3.31875800 |
| C  | -0.97429500 | -2.06126600 | -1.81160700 |
| H  | 0.34690100  | -0.61151500 | -0.95742500 |
| C  | -0.02916200 | -3.51104500 | -3.46110000 |
| H  | 2.04492600  | -3.22056600 | -3.91506300 |
| C  | -1.14033900 | -3.13109800 | -2.70165000 |
| H  | -1.80069800 | -1.73437800 | -1.18518300 |
| H  | -0.12035400 | -4.33913700 | -4.16092200 |
| C  | 4.01807200  | -1.94913700 | 1.94349500  |
| C  | 4.06438700  | -0.65295600 | 1.42940000  |
| C  | 3.62726400  | -0.39987500 | 0.12849000  |
| C  | 3.13455800  | -1.43272100 | -0.67504200 |
| C  | 3.08853300  | -2.73007500 | -0.14938900 |
| C  | 3.52927200  | -2.98831100 | 1.14815800  |
| H  | 4.35240700  | -2.14874200 | 2.95757800  |
| H  | 4.43853900  | 0.16648100  | 2.03594200  |
| H  | 3.68811500  | 0.60724500  | -0.27388200 |
| H  | 2.68876400  | -3.53746800 | -0.75680700 |
| H  | 3.48276300  | -3.99979000 | 1.54235600  |
| Ni | -2.13462400 | -2.72250000 | 0.71900300  |
| C  | -6.37830500 | -0.86349100 | -1.28065700 |
| C  | -5.17346500 | -0.63953300 | -1.95606700 |
| C  | -4.20764700 | -1.63703000 | -2.06479800 |
| C  | -4.40172300 | -2.90759600 | -1.50415300 |
| C  | -5.63304200 | -3.14224600 | -0.87580700 |
| C  | -6.58966200 | -2.13639700 | -0.74374100 |
| H  | -4.98661000 | 0.32468900  | -2.42286500 |

|    |              |             |             |
|----|--------------|-------------|-------------|
| H  | -3.30150300  | -1.41663500 | -2.61523200 |
| H  | -5.85825700  | -4.13452700 | -0.49546900 |
| H  | -7.52718600  | -2.35294100 | -0.23758500 |
| C  | -3.38532900  | -4.04275800 | -1.62380300 |
| C  | -2.43683300  | -3.90831600 | -2.84565900 |
| H  | -3.98982000  | -4.93343700 | -1.85393400 |
| H  | -2.17043700  | -4.91985800 | -3.17174000 |
| H  | -3.02912000  | -3.48637600 | -3.66822500 |
| C  | -6.95821400  | 1.52073200  | -0.54780100 |
| C  | -7.44247800  | 0.20661700  | -1.19823600 |
| H  | -7.80643300  | 0.43741300  | -2.20883000 |
| H  | -8.29878200  | -0.18449900 | -0.63746500 |
| H  | -6.07062500  | 1.84837900  | -1.10288100 |
| C  | -7.97340100  | 2.65504100  | -0.63710000 |
| C  | -9.31265700  | 2.46422000  | -0.98771200 |
| C  | -7.55043700  | 3.95507600  | -0.32396300 |
| C  | -10.21174700 | 3.53487500  | -1.03111100 |
| H  | -9.67955200  | 1.47450500  | -1.23646700 |
| C  | -8.42566800  | 5.03664600  | -0.36310700 |
| H  | -6.51668000  | 4.11972800  | -0.03137500 |
| C  | -9.75226700  | 4.80614400  | -0.71862400 |
| H  | -11.24800800 | 3.37267600  | -1.30508000 |
| H  | -8.08354100  | 6.03625900  | -0.12050200 |
| Br | -10.99898500 | 6.31568200  | -0.77793500 |
| C  | -5.73487600  | 0.97462600  | 3.57084700  |
| C  | -4.78395000  | 1.24430700  | 2.58797100  |
| C  | -5.17942100  | 1.40629600  | 1.25865100  |
| C  | -6.52514100  | 1.31169300  | 0.89655400  |
| C  | -7.47345900  | 1.03735000  | 1.89082200  |
| C  | -7.08266400  | 0.86460600  | 3.21660800  |
| H  | -5.43055100  | 0.85067500  | 4.60629000  |
| H  | -3.73195500  | 1.31305900  | 2.84566900  |
| H  | -4.43116000  | 1.59877900  | 0.49444900  |
| H  | -8.52610700  | 0.98123100  | 1.62552800  |

|   |             |             |             |
|---|-------------|-------------|-------------|
| H | -7.83024500 | 0.65599300  | 3.97704800  |
| C | -1.70834800 | -6.00017600 | 1.88649400  |
| C | -0.93731800 | -5.85121900 | 0.72265600  |
| C | -1.39827800 | -5.08706200 | -0.34102600 |
| C | -2.65768700 | -4.40707100 | -0.30338800 |
| C | -3.37377900 | -4.49840200 | 0.93571600  |
| C | -2.90910800 | -5.31618000 | 1.98787000  |
| H | -1.35790100 | -6.62584100 | 2.70222400  |
| H | 0.02376200  | -6.35132000 | 0.63793400  |
| H | -0.79252700 | -5.03371900 | -1.23647600 |
| H | -4.37082500 | -4.08552000 | 1.01438800  |
| H | -3.51381900 | -5.40311800 | 2.88660900  |
| C | -2.05968800 | -0.78599600 | 1.26425700  |
| C | -3.09559400 | -1.48691400 | 1.91395400  |
| C | -3.17927700 | -1.90116200 | 3.36865500  |
| C | -1.84887100 | -2.07698200 | 4.13917000  |
| C | -0.87013600 | -2.99585300 | 3.45944300  |
| C | 0.05622600  | -2.64832700 | 2.55473000  |
| C | 0.38954900  | -1.27230300 | 2.03119100  |
| C | -0.76976400 | -0.25862300 | 1.88939000  |
| H | -2.37775400 | -0.22962400 | 0.37967400  |
| H | -4.08114500 | -1.40303700 | 1.45217400  |
| H | -3.74359700 | -2.84173800 | 3.42102600  |
| H | -3.79024600 | -1.16091900 | 3.90830600  |
| H | -1.39610100 | -1.09844600 | 4.31584800  |
| H | -2.09169300 | -2.48007100 | 5.13069600  |
| H | -0.97056500 | -4.05304600 | 3.69213300  |
| H | 0.67687400  | -3.44498100 | 2.14793300  |
| H | 0.84925600  | -1.41115600 | 1.04917600  |
| H | 1.18010300  | -0.82205700 | 2.64987700  |
| H | -0.98380900 | 0.20388400  | 2.86009400  |
| H | -0.39787000 | 0.56113700  | 1.26069100  |

SCF Energy (a.u.) = -1897.569749

Thermal correction to Gibbs free energy (a.u.) = 0.608256

Charge = 0, Multiplicity = 1

|    |             |             |             |
|----|-------------|-------------|-------------|
| Ni | -4.75171300 | 0.81533900  | -0.65307700 |
| C  | -4.07612600 | 0.04661900  | 0.88536800  |
| C  | -2.75236700 | 0.26570800  | 1.25324300  |
| C  | -2.22976900 | -0.39230300 | 2.36637200  |
| C  | -3.02063300 | -1.26409800 | 3.13076300  |
| C  | -4.36618900 | -1.43001000 | 2.76338400  |
| C  | -4.89559000 | -0.79733400 | 1.63678500  |
| H  | -2.12470500 | 0.92957900  | 0.67338900  |
| H  | -1.19329600 | -0.22524900 | 2.64521800  |
| H  | -4.99953000 | -2.09427500 | 3.34704400  |
| H  | -5.92544500 | -0.98162900 | 1.34634900  |
| C  | -2.48052100 | -2.01666000 | 4.27254100  |
| C  | -1.19741000 | -2.35323800 | 4.45084100  |
| H  | -3.21686000 | -2.34825900 | 5.00466600  |
| H  | -0.87879000 | -2.91590600 | 5.32293500  |
| H  | -0.42956700 | -2.10372500 | 3.72400100  |
| Br | -4.62836100 | -0.97457800 | -2.05996500 |
| C  | -0.34471700 | 4.02656700  | -0.07532000 |
| C  | -1.21194900 | 4.00509100  | 1.02675400  |
| C  | -2.54333200 | 3.62523100  | 0.88902800  |
| C  | -3.05278400 | 3.26321500  | -0.36970600 |
| C  | -2.18923300 | 3.30719100  | -1.47836600 |
| C  | -0.85893100 | 3.67562200  | -1.33022700 |
| H  | -0.83445300 | 4.28176600  | 2.00807700  |
| H  | -3.19413600 | 3.61778800  | 1.75742100  |
| H  | -2.56747000 | 3.02617200  | -2.45789000 |
| H  | -0.19832300 | 3.66533700  | -2.19156500 |
| C  | -4.44441900 | 2.85576100  | -0.58183100 |
| C  | -5.39156700 | 2.48180800  | 0.36090300  |
| H  | -4.79939300 | 3.01557800  | -1.60573600 |
| H  | -6.45051800 | 2.50148000  | 0.11181500  |

|   |             |             |             |
|---|-------------|-------------|-------------|
| H | -5.15207100 | 2.43388300  | 1.41750600  |
| C | 1.90493700  | 3.08566300  | 0.62604600  |
| H | 1.53330500  | 2.90530400  | 1.64496400  |
| C | 1.54653100  | 1.85896400  | -0.19407100 |
| C | 0.52433500  | 1.01128200  | 0.23812600  |
| C | 2.15477600  | 1.58710000  | -1.42301600 |
| C | 0.11442200  | -0.07579300 | -0.52589300 |
| H | 0.03659200  | 1.21781100  | 1.18672800  |
| C | 1.76623300  | 0.47911900  | -2.17514400 |
| H | 2.96070700  | 2.22443400  | -1.77584400 |
| C | 0.74798400  | -0.37602500 | -1.73824900 |
| H | -0.67238600 | -0.71867200 | -0.15526200 |
| H | 2.28374000  | 0.25683400  | -3.10493000 |
| C | 6.20878400  | 3.57302900  | 0.94345000  |
| C | 5.41219600  | 4.67919700  | 0.65664000  |
| C | 4.02511900  | 4.54112400  | 0.54506100  |
| C | 3.41262900  | 3.29664400  | 0.72102700  |
| C | 4.22843400  | 2.19066200  | 1.01094200  |
| C | 5.60952700  | 2.32264500  | 1.12038600  |
| H | 7.28689100  | 3.67959900  | 1.02319200  |
| H | 5.86610000  | 5.65591700  | 0.51250100  |
| H | 3.42908900  | 5.41811600  | 0.31576600  |
| H | 3.77181700  | 1.21192900  | 1.12443300  |
| H | 6.21724100  | 1.44696900  | 1.32984600  |
| C | 0.82137000  | -2.94325900 | -1.68397800 |
| C | 0.44568200  | -1.65241700 | -2.48819700 |
| H | -0.60393200 | -1.69878700 | -2.79389500 |
| H | 1.03559300  | -1.66466400 | -3.41070000 |
| C | 2.24814900  | -2.76636700 | -1.17909900 |
| C | 3.32108100  | -3.08271800 | -2.01790800 |
| C | 2.53040900  | -2.14591400 | 0.04599500  |
| C | 4.63865900  | -2.77045400 | -1.67266700 |
| H | 3.12824200  | -3.56691300 | -2.97243500 |
| C | 3.83522200  | -1.82539800 | 0.41408200  |

|    |             |             |             |
|----|-------------|-------------|-------------|
| H  | 1.71931700  | -1.89245500 | 0.71701300  |
| C  | 4.87133400  | -2.13381400 | -0.46028600 |
| H  | 5.45896300  | -3.01435600 | -2.33805700 |
| H  | 4.03651100  | -1.33802800 | 1.36140200  |
| Br | 6.70548500  | -1.64759400 | 0.03413300  |
| C  | -2.03090300 | -4.15324800 | 1.37917900  |
| C  | -2.44788500 | -3.35736800 | 0.31389900  |
| C  | -1.53890400 | -2.96769300 | -0.67038100 |
| C  | -0.19017300 | -3.34603600 | -0.60747600 |
| C  | 0.20585700  | -4.17156800 | 0.45577900  |
| C  | -0.70036100 | -4.56815600 | 1.43953000  |
| H  | -2.72966400 | -4.43611100 | 2.15997400  |
| H  | -3.47419900 | -3.01204100 | 0.24753600  |
| H  | -1.90866000 | -2.33985800 | -1.47238700 |
| H  | 1.23884500  | -4.49835900 | 0.52223400  |
| H  | -0.36091400 | -5.19499500 | 2.25975400  |
| H  | 0.83745100  | -3.75745600 | -2.42268500 |
| C  | 1.12470900  | 4.32418000  | 0.09364900  |
| H  | 1.55238800  | 4.62439400  | -0.86919300 |
| H  | 1.26244600  | 5.16006400  | 0.78934000  |

### TS2g

SCF Energy (a.u.) = -1897.557489

Thermal correction to Gibbs free energy (a.u.) = 0.608388

Charge = 0, Multiplicity = 1

|    |             |             |             |
|----|-------------|-------------|-------------|
| Ni | -3.92317900 | 0.74318100  | -0.69234000 |
| C  | -4.25031800 | 0.23540000  | 1.08166600  |
| C  | -3.07196000 | 0.13171000  | 1.84562900  |
| C  | -2.93775800 | -0.89194600 | 2.77474000  |
| C  | -3.98915000 | -1.79724800 | 3.01414700  |
| C  | -5.18630300 | -1.63201400 | 2.29693400  |
| C  | -5.32687600 | -0.62678000 | 1.34157100  |
| H  | -2.26540400 | 0.84221900  | 1.69425800  |
| H  | -2.01571100 | -0.97926300 | 3.34083400  |

|    |             |             |             |
|----|-------------|-------------|-------------|
| H  | -6.01428900 | -2.31158300 | 2.48317400  |
| H  | -6.25967800 | -0.52360600 | 0.79440600  |
| C  | -3.87823400 | -2.89028600 | 3.98900500  |
| C  | -2.73882500 | -3.42194800 | 4.44940500  |
| H  | -4.82587300 | -3.30783900 | 4.32808200  |
| H  | -2.74980100 | -4.23392700 | 5.16962900  |
| H  | -1.76332500 | -3.08671100 | 4.10899400  |
| Br | -3.38493700 | 0.39746800  | -2.90387200 |
| C  | -0.06797600 | 4.14018700  | 0.27880000  |
| C  | -0.97461500 | 4.01265500  | 1.33771100  |
| C  | -2.27633400 | 3.57494200  | 1.11621000  |
| C  | -2.71990800 | 3.26779100  | -0.18215700 |
| C  | -1.83532700 | 3.48517400  | -1.25309500 |
| C  | -0.53383000 | 3.90931800  | -1.02217500 |
| H  | -0.64391000 | 4.21599200  | 2.35362600  |
| H  | -2.94738000 | 3.47250300  | 1.96345000  |
| H  | -2.15757500 | 3.24130900  | -2.26058100 |
| H  | 0.15506700  | 3.99729500  | -1.85673100 |
| C  | -4.04672300 | 2.68193400  | -0.45077300 |
| C  | -4.87083500 | 2.12685900  | 0.57887100  |
| H  | -4.52010600 | 2.96792100  | -1.38831000 |
| H  | -5.93131400 | 2.00441200  | 0.37457300  |
| H  | -4.65862000 | 2.36874800  | 1.61378800  |
| C  | 2.02578800  | 2.97565700  | 1.03582800  |
| H  | 1.59224900  | 2.78118600  | 2.02736900  |
| C  | 1.57005500  | 1.84686700  | 0.12591800  |
| C  | 0.45949400  | 1.06733100  | 0.46376400  |
| C  | 2.17883500  | 1.62682700  | -1.11242900 |
| C  | -0.03976900 | 0.10265700  | -0.40626700 |
| H  | -0.03057300 | 1.23460500  | 1.41905300  |
| C  | 1.70039000  | 0.63948700  | -1.97018100 |
| H  | 3.04934200  | 2.21282500  | -1.39368600 |
| C  | 0.59125300  | -0.14424700 | -1.63327100 |
| H  | -0.89857000 | -0.48920700 | -0.11157200 |

|    |             |             |             |
|----|-------------|-------------|-------------|
| H  | 2.21422200  | 0.45235400  | -2.90948800 |
| C  | 6.33985600  | 2.98773300  | 1.54499200  |
| C  | 5.66528500  | 4.19204400  | 1.35626700  |
| C  | 4.27801000  | 4.20496700  | 1.18329700  |
| C  | 3.54192800  | 3.01581500  | 1.19879600  |
| C  | 4.23548900  | 1.81004900  | 1.39200100  |
| C  | 5.61698900  | 1.79177100  | 1.56177700  |
| H  | 7.41875000  | 2.97738300  | 1.67154500  |
| H  | 6.21595200  | 5.12866600  | 1.33636100  |
| H  | 3.77820800  | 5.15596900  | 1.03249700  |
| H  | 3.68343000  | 0.87521800  | 1.38067300  |
| H  | 6.12884000  | 0.84251700  | 1.69190300  |
| C  | 0.48036600  | -2.69883700 | -1.87239000 |
| C  | 0.19450400  | -1.30075000 | -2.51765900 |
| H  | -0.85348300 | -1.22542400 | -2.81774100 |
| H  | 0.78241700  | -1.24948400 | -3.44010000 |
| C  | 1.90585100  | -2.68460500 | -1.33726200 |
| C  | 2.96843700  | -2.99314600 | -2.19173300 |
| C  | 2.20898400  | -2.22249200 | -0.04880800 |
| C  | 4.29857300  | -2.82657100 | -1.79706600 |
| H  | 2.75884900  | -3.35391200 | -3.19599200 |
| C  | 3.52648200  | -2.04987500 | 0.36956600  |
| H  | 1.40563400  | -1.97402500 | 0.63362000  |
| C  | 4.55398400  | -2.34639600 | -0.51905200 |
| H  | 5.11155300  | -3.06165400 | -2.47449800 |
| H  | 3.74480800  | -1.68338400 | 1.36627500  |
| Br | 6.40971900  | -2.07037400 | 0.05095400  |
| C  | -2.52405900 | -4.16761100 | 0.91814100  |
| C  | -2.86456500 | -3.21610400 | -0.04232600 |
| C  | -1.90205100 | -2.72845200 | -0.92662700 |
| C  | -0.57241400 | -3.17112200 | -0.86774000 |
| C  | -0.24951700 | -4.14203300 | 0.09182100  |
| C  | -1.21012400 | -4.63183000 | 0.97746300  |
| H  | -3.26743700 | -4.53637900 | 1.61659100  |

|   |             |             |             |
|---|-------------|-------------|-------------|
| H | -3.88165400 | -2.84099900 | -0.10413100 |
| H | -2.20841200 | -1.99121700 | -1.65868200 |
| H | 0.76712300  | -4.51761000 | 0.14979400  |
| H | -0.92859400 | -5.37961200 | 1.71428800  |
| H | 0.45492500  | -3.41762300 | -2.70402600 |
| C | 1.40321600  | 4.32317100  | 0.54959200  |
| H | 1.91739800  | 4.64601200  | -0.36212200 |
| H | 1.56683400  | 5.09262100  | 1.31313800  |

### im4g

SCF Energy (a.u.) = -1897.589746

Thermal correction to Gibbs free energy (a.u.) = 0.612370

Charge = 0, Multiplicity = 1

|    |             |             |             |
|----|-------------|-------------|-------------|
| Ni | -3.81765000 | 0.57672500  | -0.52538700 |
| C  | -5.07177500 | 1.20656000  | 1.03304900  |
| C  | -3.86559500 | 0.76045000  | 1.64391300  |
| C  | -3.80786300 | -0.50327400 | 2.26403200  |
| C  | -4.92641700 | -1.33800700 | 2.31044200  |
| C  | -6.12144800 | -0.88632900 | 1.69504100  |
| C  | -6.19388200 | 0.34250600  | 1.06964300  |
| H  | -3.02020600 | 1.43238300  | 1.74810800  |
| H  | -2.87690000 | -0.81230300 | 2.72709100  |
| H  | -6.99772500 | -1.52840600 | 1.71916700  |
| H  | -7.11979300 | 0.66384200  | 0.60135900  |
| C  | -4.93948500 | -2.63902600 | 2.99282400  |
| C  | -3.94235300 | -3.18712300 | 3.69822700  |
| H  | -5.87878500 | -3.18445500 | 2.91317700  |
| H  | -4.06596500 | -4.15298400 | 4.17745100  |
| H  | -2.97485900 | -2.71054100 | 3.82205900  |
| Br | -3.30482000 | -0.24325000 | -2.60318500 |
| C  | -0.08258600 | 4.06764200  | -0.14515100 |
| C  | -1.02767300 | 4.14331800  | 0.88339700  |
| C  | -2.32442400 | 3.67157800  | 0.70191300  |
| C  | -2.72674600 | 3.10817300  | -0.52398600 |

|   |             |             |             |
|---|-------------|-------------|-------------|
| C | -1.79196000 | 3.10820600  | -1.57882400 |
| C | -0.50185600 | 3.58139600  | -1.39149400 |
| H | -0.73378300 | 4.54190400  | 1.85193400  |
| H | -3.02263100 | 3.73747600  | 1.53039200  |
| H | -2.07650900 | 2.67080000  | -2.53087700 |
| H | 0.21642500  | 3.50910600  | -2.20247900 |
| C | -4.04501000 | 2.47981100  | -0.73597200 |
| C | -5.12687400 | 2.56551400  | 0.33817400  |
| H | -4.41087500 | 2.57648500  | -1.75827200 |
| H | -6.11164700 | 2.69381900  | -0.11858400 |
| H | -4.98181800 | 3.39058200  | 1.04521900  |
| C | 1.99985000  | 3.05611400  | 0.83080200  |
| H | 1.52188300  | 2.98452800  | 1.81826600  |
| C | 1.61152300  | 1.80800000  | 0.05566200  |
| C | 0.50223000  | 1.04626600  | 0.43534200  |
| C | 2.28007800  | 1.46222700  | -1.12220800 |
| C | 0.06292900  | -0.02454500 | -0.33937300 |
| H | -0.04399800 | 1.31631800  | 1.33547800  |
| C | 1.85323700  | 0.38019200  | -1.88603200 |
| H | 3.15059200  | 2.03386300  | -1.43169200 |
| C | 0.74418400  | -0.38631500 | -1.50883400 |
| H | -0.80130000 | -0.59582000 | -0.02022300 |
| H | 2.40718600  | 0.10422900  | -2.77943000 |
| C | 6.28587300  | 3.23498800  | 1.51512300  |
| C | 5.60420700  | 4.38253600  | 1.11606000  |
| C | 4.22574900  | 4.34118300  | 0.88601700  |
| C | 3.50570300  | 3.15399300  | 1.05333400  |
| C | 4.20625200  | 2.00600800  | 1.45743700  |
| C | 5.57890700  | 2.04146800  | 1.68526100  |
| H | 7.35822100  | 3.26533900  | 1.68625500  |
| H | 6.14268800  | 5.31587600  | 0.97522600  |
| H | 3.72035900  | 5.24742500  | 0.56969700  |
| H | 3.66656100  | 1.07008400  | 1.56651100  |
| H | 6.09844500  | 1.13423100  | 1.97973200  |

|    |             |             |             |
|----|-------------|-------------|-------------|
| C  | 0.82585600  | -2.95397600 | -1.56089400 |
| C  | 0.40345900  | -1.63305700 | -2.28767400 |
| H  | -0.65827000 | -1.66238300 | -2.54403900 |
| H  | 0.94878800  | -1.60682000 | -3.23696100 |
| C  | 2.24667300  | -2.78061400 | -1.04259400 |
| C  | 3.33218300  | -3.04224400 | -1.88300900 |
| C  | 2.50429000  | -2.22346500 | 0.21746200  |
| C  | 4.64208700  | -2.74051500 | -1.50083200 |
| H  | 3.15609900  | -3.47475300 | -2.86513400 |
| C  | 3.80080500  | -1.91469600 | 0.62216300  |
| H  | 1.67874300  | -2.00762900 | 0.88525400  |
| C  | 4.85209900  | -2.17158900 | -0.25124800 |
| H  | 5.47426800  | -2.94224200 | -2.16560800 |
| H  | 3.98502000  | -1.47532300 | 1.59592400  |
| Br | 6.67698300  | -1.71290400 | 0.29932600  |
| C  | -1.94509300 | -4.58122000 | 1.37271000  |
| C  | -2.38216000 | -3.61394500 | 0.46884700  |
| C  | -1.49908200 | -3.06856900 | -0.46581000 |
| C  | -0.15584600 | -3.46590300 | -0.50668800 |
| C  | 0.26706700  | -4.44439000 | 0.40649600  |
| C  | -0.61327100 | -4.99698300 | 1.33514900  |
| H  | -2.63700300 | -5.00938300 | 2.09114200  |
| H  | -3.41546800 | -3.28042400 | 0.48296300  |
| H  | -1.88260500 | -2.33266000 | -1.16204500 |
| H  | 1.30076500  | -4.77615000 | 0.38894000  |
| H  | -0.25721000 | -5.75584300 | 2.02691000  |
| H  | 0.85880000  | -3.72407100 | -2.34485300 |
| C  | 1.37718400  | 4.30966800  | 0.13794500  |
| H  | 1.91741800  | 4.50585000  | -0.79472000 |
| H  | 1.50745400  | 5.18307000  | 0.78753000  |

**im5g**

SCF Energy (a.u.) = -2038.634365

Thermal correction to Gibbs free energy (a.u.) = 0.678814

Charge = 0, Multiplicity = 1

|    |             |             |             |
|----|-------------|-------------|-------------|
| Ni | 3.66278400  | 0.57815800  | 0.53896000  |
| C  | 4.90122900  | 1.33541400  | -1.02360200 |
| C  | 3.66900800  | 0.94849800  | -1.61658800 |
| C  | 3.58724800  | -0.23214000 | -2.38135400 |
| C  | 4.70287500  | -1.04439500 | -2.58411500 |
| C  | 5.93015900  | -0.64430500 | -1.99829300 |
| C  | 6.02666700  | 0.50246500  | -1.23498600 |
| H  | 2.81762500  | 1.62058400  | -1.60668200 |
| H  | 2.64139900  | -0.48256500 | -2.85030200 |
| H  | 6.81103400  | -1.26164700 | -2.15443600 |
| H  | 6.97865800  | 0.78567200  | -0.79432600 |
| C  | 4.67259500  | -2.26130200 | -3.40685400 |
| C  | 3.58142100  | -2.89477100 | -3.85339200 |
| H  | 5.65148700  | -2.66915600 | -3.65629200 |
| H  | 3.66532300  | -3.78586700 | -4.46737700 |
| H  | 2.57431900  | -2.57108900 | -3.61009300 |
| C  | -0.04985200 | 4.10393700  | 0.31057300  |
| C  | 0.91738900  | 4.25092100  | -0.68679800 |
| C  | 2.21666300  | 3.78121900  | -0.50272200 |
| C  | 2.59486700  | 3.13651500  | 0.68848600  |
| C  | 1.64157500  | 3.08122000  | 1.72348500  |
| C  | 0.35288200  | 3.55980200  | 1.53914000  |
| H  | 0.64066000  | 4.69700600  | -1.63989800 |
| H  | 2.92997900  | 3.89756700  | -1.31279100 |
| H  | 1.90784200  | 2.58893200  | 2.65423500  |
| H  | -0.37975000 | 3.43770700  | 2.33115500  |
| C  | 3.89901000  | 2.45760300  | 0.87244200  |
| C  | 4.98960700  | 2.61048200  | -0.18879600 |
| H  | 4.26259900  | 2.51706500  | 1.90033300  |
| H  | 5.97612700  | 2.65634100  | 0.28099200  |
| H  | 4.88375800  | 3.51021800  | -0.80867400 |
| C  | -2.07273700 | 3.05585200  | -0.75534900 |
| H  | -1.58898600 | 3.05200300  | -1.74265300 |

|   |             |             |             |
|---|-------------|-------------|-------------|
| C | -1.62003100 | 1.80075100  | -0.02988200 |
| C | -0.48217600 | 1.10343800  | -0.44646800 |
| C | -2.24171700 | 1.40473800  | 1.15792300  |
| C | 0.04410600  | 0.06307700  | 0.31487600  |
| H | 0.02369900  | 1.41106300  | -1.35803900 |
| C | -1.72577100 | 0.35411000  | 1.90988400  |
| H | -3.13584200 | 1.92337200  | 1.49272600  |
| C | -0.57325100 | -0.33076000 | 1.50863100  |
| H | 0.93462200  | -0.45415900 | -0.02510000 |
| H | -2.23462200 | 0.04535000  | 2.81941200  |
| C | -6.36150900 | 3.07661800  | -1.45451900 |
| C | -5.71575600 | 4.25525600  | -1.08625700 |
| C | -4.33830400 | 4.26126400  | -0.84945800 |
| C | -3.58145300 | 3.09153700  | -0.97871900 |
| C | -4.24609500 | 1.91206300  | -1.35182500 |
| C | -5.61860400 | 1.90067800  | -1.58635300 |
| H | -7.43343900 | 3.07041600  | -1.63125200 |
| H | -6.28222800 | 5.17605300  | -0.97522900 |
| H | -3.86091700 | 5.19089600  | -0.55834700 |
| H | -3.68027800 | 0.98883200  | -1.43286400 |
| H | -6.10792800 | 0.96949400  | -1.85723200 |
| C | -0.41175900 | -2.89729600 | 1.62151600  |
| C | -0.09927000 | -1.52204900 | 2.30235100  |
| H | 0.96676400  | -1.43461000 | 2.51843800  |
| H | -0.61790100 | -1.52128900 | 3.26716100  |
| C | -1.82825100 | -2.84231400 | 1.06712300  |
| C | -2.91495300 | -3.11685000 | 1.90190800  |
| C | -2.08966300 | -2.36523200 | -0.22428300 |
| C | -4.23055200 | -2.89749500 | 1.48509400  |
| H | -2.73586800 | -3.48929600 | 2.90786200  |
| C | -3.39175700 | -2.13680300 | -0.66337000 |
| H | -1.26304000 | -2.14597100 | -0.88953700 |
| C | -4.44462900 | -2.39819800 | 0.20670700  |
| H | -5.06412600 | -3.10542200 | 2.14621700  |

|    |             |             |             |
|----|-------------|-------------|-------------|
| H  | -3.57905200 | -1.75292500 | -1.65984600 |
| Br | -6.27864800 | -2.04396700 | -0.39000200 |
| C  | 2.54032300  | -4.46200600 | -1.16258100 |
| C  | 2.87222100  | -3.39487400 | -0.32879400 |
| C  | 1.93060600  | -2.86408800 | 0.55661100  |
| C  | 0.62887200  | -3.38096900 | 0.61221100  |
| C  | 0.30810500  | -4.45377900 | -0.23422000 |
| C  | 1.24941100  | -4.99065600 | -1.11072200 |
| H  | 3.27803900  | -4.87412500 | -1.84348200 |
| H  | 3.87074400  | -2.96764600 | -0.36059500 |
| H  | 2.23807300  | -2.04625600 | 1.19877700  |
| H  | -0.69331500 | -4.87311300 | -0.20368900 |
| H  | 0.97388400  | -5.82510700 | -1.75031200 |
| H  | -0.41075800 | -3.63769300 | 2.43434700  |
| C  | -1.51055600 | 4.30786400  | -0.00237500 |
| H  | -2.08319800 | 4.45187900  | 0.92065800  |
| H  | -1.65545200 | 5.19861400  | -0.62459500 |
| O  | 3.10361700  | -0.11450800 | 2.07534400  |
| C  | 3.81479000  | -0.02287300 | 3.28313800  |
| C  | 3.09053200  | -0.80707300 | 4.37555700  |
| H  | 3.90247400  | 1.03059300  | 3.60429600  |
| H  | 4.84477300  | -0.40825700 | 3.18109700  |
| H  | 3.63374400  | -0.74725400 | 5.32674800  |
| H  | 2.08102800  | -0.40820500 | 4.52320400  |
| H  | 3.00275100  | -1.86210100 | 4.09251300  |

**im6g**

SCF Energy (a.u.) = -2642.347652

Thermal correction to Gibbs free energy (a.u.) = 0.910305

Charge = 0, Multiplicity = 1

|    |            |             |             |
|----|------------|-------------|-------------|
| Ni | 4.01880600 | 0.00029100  | -0.79842700 |
| C  | 3.53113400 | -2.20415200 | -2.91692000 |
| C  | 2.28237700 | -2.64019800 | -3.37801200 |
| C  | 1.64821700 | -3.74575000 | -2.81634200 |

|   |             |             |             |
|---|-------------|-------------|-------------|
| C | 2.25667800  | -4.47155600 | -1.77955400 |
| C | 3.50390300  | -4.02361000 | -1.31135200 |
| C | 4.13243900  | -2.91534700 | -1.86903900 |
| H | 1.79463000  | -2.09704300 | -4.18433700 |
| H | 0.66705800  | -4.03961400 | -3.17707100 |
| H | 3.98953200  | -4.56089200 | -0.49993900 |
| H | 5.08187400  | -2.57670300 | -1.46860400 |
| C | 1.64831100  | -5.66697000 | -1.17844100 |
| C | 0.69892900  | -6.44051500 | -1.72198000 |
| H | 2.04912300  | -5.94671600 | -0.20388700 |
| H | 0.30921300  | -7.30705800 | -1.19730900 |
| H | 0.29486300  | -6.25087000 | -2.71298000 |
| C | 1.24204000  | 2.92436200  | -1.52803000 |
| C | 1.01816300  | 1.55920400  | -1.63351200 |
| C | 2.02777600  | 0.67632100  | -2.06376800 |
| C | 3.31343200  | 1.16312600  | -2.41010900 |
| C | 3.54058200  | 2.56431600  | -2.26774000 |
| C | 2.53392300  | 3.40759700  | -1.85587400 |
| H | 0.05240700  | 1.14488100  | -1.38509100 |
| H | 1.78046100  | -0.36830000 | -2.21117100 |
| H | 4.52356600  | 2.95839200  | -2.51091100 |
| H | 2.72935500  | 4.47497700  | -1.78060700 |
| C | 4.41157700  | 0.23602100  | -2.65852900 |
| C | 4.22997700  | -1.00877500 | -3.53878900 |
| H | 5.22914000  | -1.33185700 | -3.85315700 |
| H | 3.69725700  | -0.72781200 | -4.45867800 |
| C | -1.27390600 | 3.61833900  | -1.40731700 |
| H | -1.29137200 | 3.20257300  | -2.42194300 |
| C | -1.88845700 | 2.57666200  | -0.47943000 |
| C | -2.33086200 | 1.34583300  | -0.96639700 |
| C | -2.02460500 | 2.82066700  | 0.89284100  |
| C | -2.81033400 | 0.35245600  | -0.11142600 |
| H | -2.26862500 | 1.13996500  | -2.03243700 |
| C | -2.51612700 | 1.83721000  | 1.74556600  |

|    |              |             |             |
|----|--------------|-------------|-------------|
| H  | -1.74116400  | 3.78741800  | 1.29954100  |
| C  | -2.88602800  | 0.56892200  | 1.26863000  |
| H  | -3.10694100  | -0.59803900 | -0.53202700 |
| H  | -2.59267000  | 2.04571700  | 2.81036900  |
| C  | -3.88011600  | 7.08844600  | -1.41853200 |
| C  | -2.74688800  | 7.08051100  | -0.60634200 |
| C  | -1.88828700  | 5.97890000  | -0.60585700 |
| C  | -2.14891700  | 4.86742700  | -1.41562400 |
| C  | -3.29229700  | 4.88705500  | -2.22497600 |
| C  | -4.15018600  | 5.98474300  | -2.23087800 |
| H  | -4.54618600  | 7.94646500  | -1.42119300 |
| H  | -2.52538300  | 7.93400900  | 0.02860500  |
| H  | -1.00821900  | 5.99488600  | 0.02966000  |
| H  | -3.51061000  | 4.02641400  | -2.85284200 |
| H  | -5.02834600  | 5.98025100  | -2.87071200 |
| C  | -4.08554400  | -1.73596900 | 1.88664600  |
| C  | -3.25800500  | -0.49082000 | 2.29132500  |
| H  | -2.31853500  | -0.85972300 | 2.72415200  |
| H  | -3.78664600  | -0.00185700 | 3.11903000  |
| C  | -5.54202800  | -1.45032000 | 1.55164200  |
| C  | -6.46587900  | -2.50126600 | 1.65403200  |
| C  | -6.01350200  | -0.19656600 | 1.15038300  |
| C  | -7.81558200  | -2.32115700 | 1.36147000  |
| H  | -6.11931100  | -3.48452800 | 1.96212200  |
| C  | -7.36451100  | 0.00891800  | 0.85467600  |
| H  | -5.33160700  | 0.64004000  | 1.05964000  |
| C  | -8.24488100  | -1.05866600 | 0.96221200  |
| H  | -8.51651300  | -3.14365600 | 1.44671600  |
| H  | -7.71536300  | 0.98719600  | 0.54638800  |
| Br | -10.13917400 | -0.78381100 | 0.54725100  |
| C  | -1.99321400  | -4.19842300 | -1.02653100 |
| C  | -1.43180300  | -3.93605000 | 0.22397800  |
| C  | -2.12117800  | -3.15434300 | 1.15019100  |
| C  | -3.38077900  | -2.61705300 | 0.84790600  |

|   |             |             |             |
|---|-------------|-------------|-------------|
| C | -3.94173000 | -2.90520500 | -0.40200000 |
| C | -3.25184800 | -3.68397900 | -1.33361000 |
| H | -1.45168600 | -4.80908200 | -1.74112100 |
| H | -0.45882700 | -4.34835500 | 0.47317100  |
| H | -1.66929200 | -2.95649200 | 2.11888200  |
| H | -4.91882100 | -2.50783200 | -0.65517400 |
| H | -3.70434400 | -3.88730200 | -2.30044100 |
| H | -4.11177600 | -2.33804000 | 2.80649800  |
| C | 0.20400600  | 3.92695000  | -1.06300300 |
| H | 0.29956900  | 4.05679300  | 0.02417400  |
| H | 0.45771400  | 4.89857700  | -1.50199600 |
| O | 5.60728800  | -0.53009000 | -0.07765900 |
| C | 6.83659100  | -0.00852600 | -0.50072100 |
| C | 7.53453100  | -0.89160000 | -1.53555500 |
| H | 7.49777900  | 0.07020800  | 0.37904200  |
| H | 6.73551500  | 1.01723100  | -0.89665400 |
| H | 8.52340200  | -0.49094600 | -1.79479400 |
| H | 7.66483200  | -1.90455400 | -1.13769900 |
| H | 6.94301700  | -0.96430000 | -2.45333500 |
| H | 5.35913600  | 0.74156500  | -2.85015900 |
| C | 0.55276900  | -0.73596600 | 0.81277500  |
| C | 1.56289400  | -1.66955600 | 0.60468500  |
| C | 2.88597300  | -1.35569600 | 0.95276800  |
| C | 3.22016700  | -0.08514100 | 1.47676300  |
| C | 2.17821200  | 0.85616500  | 1.63409600  |
| C | 0.86123600  | 0.52989100  | 1.32982900  |
| H | -0.47262600 | -0.97926600 | 0.55621900  |
| H | 1.33371200  | -2.64019300 | 0.17739500  |
| H | 3.66189100  | -2.10844600 | 0.86951600  |
| H | 2.42136600  | 1.84277400  | 2.01867500  |
| H | 0.06949900  | 1.25583000  | 1.47405600  |
| C | 6.34264700  | 1.86912700  | 2.59011600  |
| C | 6.58437100  | -0.49642700 | 3.27584600  |
| C | 6.72381400  | 0.95435500  | 3.76517300  |

|   |            |             |            |
|---|------------|-------------|------------|
| H | 7.11108700 | 1.81572900  | 1.80840600 |
| H | 6.74590000 | -1.19396400 | 4.10584700 |
| B | 4.67227300 | 0.21803700  | 2.01110300 |
| O | 5.08473900 | 1.53174000  | 2.01471700 |
| O | 5.29203000 | -0.76136800 | 2.74635800 |
| H | 6.27801700 | 2.91104000  | 2.92524400 |
| H | 7.33695700 | -0.71050100 | 2.50521400 |
| C | 8.17872600 | 1.22234100  | 4.16544200 |
| H | 8.86458900 | 1.03993100  | 3.32946200 |
| H | 8.31040800 | 2.26148900  | 4.48981500 |
| H | 8.48006400 | 0.57455400  | 4.99706600 |
| C | 5.78762300 | 1.20315800  | 4.95834800 |
| H | 6.04126700 | 0.53984300  | 5.79353300 |
| H | 5.87556400 | 2.23833700  | 5.30873700 |
| H | 4.74261700 | 1.02312300  | 4.69152100 |

### TS3g

SCF Energy (a.u.) = -2642.347400

Thermal correction to Gibbs free energy (a.u.) = 0.911355

Charge = 0, Multiplicity = 1

|    |            |             |             |
|----|------------|-------------|-------------|
| Ni | 4.00456300 | 0.04275300  | -0.82141300 |
| C  | 3.53955000 | -2.14146300 | -2.96199000 |
| C  | 2.29151800 | -2.57313300 | -3.42926500 |
| C  | 1.65411500 | -3.68063300 | -2.87522300 |
| C  | 2.25849500 | -4.41289900 | -1.84048700 |
| C  | 3.50529200 | -3.97022700 | -1.36695300 |
| C  | 4.13718100 | -2.86021700 | -1.91738700 |
| H  | 1.80675200 | -2.02460900 | -4.23375500 |
| H  | 0.67364200 | -3.97141400 | -3.24030000 |
| H  | 3.98848100 | -4.51331500 | -0.55799100 |
| H  | 5.08721500 | -2.52762000 | -1.51352800 |
| C  | 1.64791500 | -5.61229300 | -1.24955000 |
| C  | 0.70599800 | -6.38583700 | -1.80578100 |
| H  | 2.04076800 | -5.89551700 | -0.27278400 |

|   |             |             |             |
|---|-------------|-------------|-------------|
| H | 0.31346500  | -7.25577100 | -1.28888400 |
| H | 0.31093200  | -6.19235700 | -2.79967600 |
| C | 1.22007600  | 2.95505600  | -1.52065800 |
| C | 1.00249100  | 1.59000200  | -1.63978400 |
| C | 2.01559500  | 0.71767300  | -2.08458900 |
| C | 3.29896300  | 1.21535600  | -2.42716900 |
| C | 3.51834800  | 2.61644300  | -2.27062700 |
| C | 2.50801400  | 3.44933900  | -1.84806600 |
| H | 0.03955100  | 1.16777700  | -1.39167500 |
| H | 1.77362800  | -0.32655700 | -2.24329300 |
| H | 4.49875500  | 3.01853000  | -2.51096400 |
| H | 2.69725800  | 4.51699300  | -1.76215500 |
| C | 4.40632700  | 0.29933200  | -2.67965100 |
| C | 4.24001200  | -0.94020700 | -3.57043300 |
| H | 5.24381900  | -1.25673200 | -3.87656400 |
| H | 3.71563100  | -0.65525700 | -4.49384800 |
| C | -1.29796600 | 3.63147400  | -1.37487800 |
| H | -1.32213600 | 3.22557100  | -2.39336100 |
| C | -1.89780600 | 2.57722800  | -0.45192100 |
| C | -2.36745800 | 1.36181900  | -0.95151800 |
| C | -1.99981600 | 2.79761600  | 0.92727700  |
| C | -2.84773600 | 0.36165400  | -0.10453600 |
| H | -2.32950100 | 1.17420200  | -2.02208600 |
| C | -2.48770700 | 1.80641700  | 1.77246100  |
| H | -1.69319300 | 3.75236100  | 1.34542500  |
| C | -2.89162500 | 0.55451100  | 1.28029600  |
| H | -3.16988600 | -0.57573300 | -0.53560200 |
| H | -2.53760700 | 1.99611900  | 2.84237200  |
| C | -3.92964000 | 7.08211000  | -1.32690700 |
| C | -2.79186500 | 7.07185100  | -0.52105400 |
| C | -1.92538500 | 5.97666700  | -0.53966100 |
| C | -2.18240300 | 4.87408400  | -1.36262500 |
| C | -3.33020700 | 4.89592700  | -2.16552000 |
| C | -4.19615300 | 5.98726200  | -2.15224400 |

|    |              |             |             |
|----|--------------|-------------|-------------|
| H  | -4.60195600  | 7.93515600  | -1.31458900 |
| H  | -2.57307600  | 7.91855000  | 0.12385100  |
| H  | -1.04203700  | 5.99078400  | 0.09134800  |
| H  | -3.54571600  | 4.04210400  | -2.80357200 |
| H  | -5.07777700  | 5.98470100  | -2.78730300 |
| C  | -4.08609600  | -1.75879300 | 1.87264300  |
| C  | -3.26873400  | -0.51286100 | 2.29338800  |
| H  | -2.33191100  | -0.87907500 | 2.73394200  |
| H  | -3.80792100  | -0.03155000 | 3.11889500  |
| C  | -5.54539000  | -1.47938200 | 1.54463100  |
| C  | -6.46357100  | -2.53542500 | 1.64455300  |
| C  | -6.02457900  | -0.22579300 | 1.15190700  |
| C  | -7.81516800  | -2.36057400 | 1.35726200  |
| H  | -6.11111600  | -3.51852400 | 1.94644000  |
| C  | -7.37749500  | -0.02550300 | 0.86173900  |
| H  | -5.34704600  | 0.61465200  | 1.06360400  |
| C  | -8.25211800  | -1.09818400 | 0.96622400  |
| H  | -8.51166600  | -3.18704400 | 1.44041400  |
| H  | -7.73435800  | 0.95267300  | 0.56010700  |
| Br | -10.14907600 | -0.83064400 | 0.55888700  |
| C  | -1.98486000  | -4.16874100 | -1.07831200 |
| C  | -1.41310800  | -3.90221800 | 0.16664000  |
| C  | -2.10338500  | -3.13531100 | 1.10436900  |
| C  | -3.37595900  | -2.61901700 | 0.81992200  |
| C  | -3.94657500  | -2.91077200 | -0.42470900 |
| C  | -3.25497600  | -3.67346000 | -1.36829800 |
| H  | -1.44211000  | -4.76800200 | -1.80154800 |
| H  | -0.43175800  | -4.30179700 | 0.40315600  |
| H  | -1.64293400  | -2.93475000 | 2.06838500  |
| H  | -4.93329200  | -2.52934100 | -0.66455400 |
| H  | -3.71565400  | -3.87982400 | -2.33062200 |
| H  | -4.10644300  | -2.37437500 | 2.78365600  |
| C  | 0.17988900   | 3.94836000  | -1.04177600 |
| H  | 0.28540200   | 4.07326400  | 0.04497600  |

|   |             |             |             |
|---|-------------|-------------|-------------|
| H | 0.42335500  | 4.92399800  | -1.47769500 |
| O | 5.58610200  | -0.48036900 | -0.06350900 |
| C | 6.82378900  | 0.04049300  | -0.47193400 |
| C | 7.51381600  | -0.82962200 | -1.52149900 |
| H | 7.48026200  | 0.09341300  | 0.41128400  |
| H | 6.72967300  | 1.07426200  | -0.84611200 |
| H | 8.50614600  | -0.43209000 | -1.77161300 |
| H | 7.63562300  | -1.85052100 | -1.14189900 |
| H | 6.92370400  | -0.88020800 | -2.44137800 |
| H | 5.34953000  | 0.81583500  | -2.86437000 |
| C | 0.56896100  | -0.64335400 | 0.86021600  |
| C | 1.53666000  | -1.61317700 | 0.61634600  |
| C | 2.87955800  | -1.35157600 | 0.92717000  |
| C | 3.27938900  | -0.10041900 | 1.45170900  |
| C | 2.27872400  | 0.87764700  | 1.64739300  |
| C | 0.94158500  | 0.60518300  | 1.37684800  |
| H | -0.47171200 | -0.84426600 | 0.62926300  |
| H | 1.25850600  | -2.57075700 | 0.18822100  |
| H | 3.62405500  | -2.13077900 | 0.80949800  |
| H | 2.57195800  | 1.84978600  | 2.03367500  |
| H | 0.18220700  | 1.35951400  | 1.54864800  |
| C | 6.41523700  | 1.77388400  | 2.64990900  |
| C | 6.62539000  | -0.61576900 | 3.25518200  |
| C | 6.74430900  | 0.81503600  | 3.80570600  |
| H | 7.22202900  | 1.75100700  | 1.90531600  |
| H | 6.76003900  | -1.34479100 | 4.06302600  |
| B | 4.76743000  | 0.14525700  | 1.93239100  |
| O | 5.18506400  | 1.46171900  | 2.00857500  |
| O | 5.35340400  | -0.85923400 | 2.67352100  |
| H | 6.33652300  | 2.80252000  | 3.02214900  |
| H | 7.40992500  | -0.79805100 | 2.50717400  |
| C | 8.17952300  | 1.06532700  | 4.28084200  |
| H | 8.90277200  | 0.91114700  | 3.47097700  |
| H | 8.29732600  | 2.09210000  | 4.64743600  |

|   |            |            |            |
|---|------------|------------|------------|
| H | 8.44257300 | 0.38782700 | 5.10177900 |
| C | 5.75507500 | 1.01947400 | 4.96389400 |
| H | 5.96955600 | 0.32314500 | 5.78313800 |
| H | 5.82827100 | 2.03991300 | 5.35838200 |
| H | 4.72360800 | 0.85278700 | 4.64192000 |

**im7g**

SCF Energy (a.u.) = -2642.367163

Thermal correction to Gibbs free energy (a.u.) = 0.910696

Charge = 0, Multiplicity = 1

|    |             |             |             |
|----|-------------|-------------|-------------|
| Ni | 3.89638600  | 0.85575100  | -0.81602000 |
| C  | 2.96034600  | -2.28376600 | -1.42529200 |
| C  | 1.73529500  | -2.87927200 | -1.74904200 |
| C  | 0.97166000  | -3.52864200 | -0.78200200 |
| C  | 1.41547700  | -3.59823100 | 0.54881100  |
| C  | 2.63235600  | -2.97440600 | 0.87406600  |
| C  | 3.40504300  | -2.34422100 | -0.09695500 |
| H  | 1.36726000  | -2.82042200 | -2.77082800 |
| H  | 0.01500200  | -3.96448200 | -1.05505700 |
| H  | 2.99020500  | -3.00481700 | 1.90052900  |
| H  | 4.33610900  | -1.86384600 | 0.19453600  |
| C  | 0.66595200  | -4.31464100 | 1.59151900  |
| C  | -0.14140800 | -5.36579800 | 1.39586900  |
| H  | 0.83005400  | -3.96443600 | 2.61069800  |
| H  | -0.65483700 | -5.84739000 | 2.22256600  |
| H  | -0.28777200 | -5.79920100 | 0.41025700  |
| C  | 0.42263600  | 2.57173500  | -1.29436300 |
| C  | 0.79467800  | 1.48588900  | -0.52533200 |
| C  | 1.77585700  | 0.56956400  | -0.96184400 |
| C  | 2.40998100  | 0.74852100  | -2.23291800 |
| C  | 2.05760200  | 1.91436100  | -2.98178600 |
| C  | 1.07838100  | 2.77177100  | -2.53631200 |
| H  | 0.29498500  | 1.29369400  | 0.41514100  |
| H  | 1.86651300  | -0.36504400 | -0.42335900 |

|   |             |             |             |
|---|-------------|-------------|-------------|
| H | 2.55629200  | 2.09224100  | -3.93067400 |
| H | 0.79406700  | 3.62535700  | -3.14797000 |
| C | 3.60248600  | -0.01942000 | -2.51651500 |
| C | 3.75786800  | -1.53825700 | -2.46915900 |
| H | 4.82591600  | -1.74180000 | -2.32590800 |
| H | 3.49841600  | -1.93313500 | -3.46350400 |
| C | -2.08943200 | 2.77915600  | -1.32150100 |
| H | -2.02027600 | 2.59590000  | -2.40203900 |
| C | -2.24584900 | 1.42943700  | -0.63980000 |
| C | -1.92068200 | 0.24222100  | -1.30473400 |
| C | -2.63801000 | 1.35666400  | 0.70069200  |
| C | -2.01662900 | -0.99090700 | -0.66169900 |
| H | -1.57750800 | 0.28557200  | -2.33508400 |
| C | -2.74810900 | 0.12515200  | 1.33871400  |
| H | -2.89463000 | 2.26730900  | 1.23469100  |
| C | -2.47031400 | -1.06904400 | 0.66171600  |
| H | -1.77249900 | -1.89833200 | -1.20270000 |
| H | -3.10800600 | 0.08162800  | 2.36327600  |
| C | -5.69758600 | 5.07750900  | -0.60605500 |
| C | -4.49032400 | 5.51657300  | -0.06822100 |
| C | -3.31013700 | 4.80297200  | -0.30370600 |
| C | -3.32133900 | 3.64070000  | -1.07859500 |
| C | -4.54405000 | 3.21098200  | -1.61855800 |
| C | -5.72025200 | 3.91842900  | -1.38876800 |
| H | -6.61401900 | 5.63007700  | -0.42076800 |
| H | -4.46019900 | 6.41611300  | 0.54038200  |
| H | -2.38163900 | 5.16206500  | 0.12810400  |
| H | -4.56564100 | 2.30195900  | -2.21517900 |
| H | -6.65511400 | 3.56978800  | -1.81937400 |
| C | -4.14674000 | -3.01055600 | 0.70022800  |
| C | -2.82700300 | -2.38892300 | 1.29044900  |
| H | -2.01661500 | -3.11426900 | 1.17398500  |
| H | -2.98174500 | -2.25184600 | 2.36642000  |
| C | -5.31854000 | -2.05852800 | 0.86872200  |

|    |             |             |             |
|----|-------------|-------------|-------------|
| C  | -6.30737800 | -2.34642400 | 1.81601000  |
| C  | -5.42131800 | -0.84764900 | 0.16257300  |
| C  | -7.36273400 | -1.46720100 | 2.06971400  |
| H  | -6.25360400 | -3.27592300 | 2.37749700  |
| C  | -6.46146900 | 0.04920300  | 0.40206700  |
| H  | -4.67699100 | -0.58277500 | -0.57737700 |
| C  | -7.41765300 | -0.27586700 | 1.35710900  |
| H  | -8.11843000 | -1.70761500 | 2.80873500  |
| H  | -6.50539800 | 0.99043400  | -0.13443000 |
| Br | -8.87676100 | 0.98468100  | 1.70890300  |
| C  | -3.36456400 | -4.61796300 | -3.26746300 |
| C  | -2.64137900 | -5.04843600 | -2.15172500 |
| C  | -2.92518200 | -4.52567700 | -0.89278700 |
| C  | -3.92401400 | -3.55538300 | -0.71085900 |
| C  | -4.66083700 | -3.15863500 | -1.83042400 |
| C  | -4.38051100 | -3.68052300 | -3.09679900 |
| H  | -3.14521500 | -5.01930100 | -4.25268600 |
| H  | -1.86009800 | -5.79623500 | -2.26141900 |
| H  | -2.35823200 | -4.87293200 | -0.03473900 |
| H  | -5.46469500 | -2.44073400 | -1.72265800 |
| H  | -4.96474700 | -3.34883000 | -3.95082300 |
| H  | -4.35556100 | -3.88216100 | 1.33477000  |
| C  | -0.74526400 | 3.43760500  | -0.89591300 |
| H  | -0.74693000 | 3.58592500  | 0.18962000  |
| H  | -0.66640500 | 4.42605100  | -1.36326900 |
| O  | 5.76995100  | 0.62685700  | -0.70468800 |
| C  | 6.63170400  | 1.38855600  | -1.55397100 |
| C  | 7.47737300  | 0.45313800  | -2.40628400 |
| H  | 7.25544000  | 2.02909300  | -0.92365400 |
| H  | 6.02468100  | 2.03892700  | -2.19691300 |
| H  | 8.15798800  | 1.02293900  | -3.05057400 |
| H  | 8.07515700  | -0.20835800 | -1.77034500 |
| H  | 6.83973100  | -0.17211800 | -3.04094000 |
| H  | 4.20966000  | 0.40407300  | -3.32117500 |

|   |             |             |            |
|---|-------------|-------------|------------|
| C | 2.08161000  | 2.87579700  | 2.03450700 |
| C | 2.31501800  | 1.57990500  | 2.51548300 |
| C | 3.45112700  | 0.88374400  | 2.11834100 |
| C | 4.40634200  | 1.46064200  | 1.24762300 |
| C | 4.13160200  | 2.76104500  | 0.76103500 |
| C | 2.98207000  | 3.46289100  | 1.15090300 |
| H | 1.19229400  | 3.41806700  | 2.34565400 |
| H | 1.60317000  | 1.12062900  | 3.19693500 |
| H | 3.64379400  | -0.11786700 | 2.48999900 |
| H | 4.86560200  | 3.25499100  | 0.12769300 |
| H | 2.80086100  | 4.46434300  | 0.77046500 |
| C | 8.19108500  | 0.85017100  | 1.42136500 |
| C | 7.01198100  | -1.31844500 | 1.39229500 |
| C | 8.08953500  | -0.50988900 | 2.13574700 |
| H | 8.64010800  | 0.69098800  | 0.42489200 |
| H | 6.85802300  | -2.28877400 | 1.88307000 |
| B | 5.81623300  | 0.71883900  | 0.89903800 |
| O | 6.94331300  | 1.50598200  | 1.30390600 |
| O | 5.77510200  | -0.64047000 | 1.37440000 |
| H | 8.86503800  | 1.51728100  | 1.97487500 |
| H | 7.35499400  | -1.52051200 | 0.36224800 |
| C | 9.43547600  | -1.23572800 | 2.04850300 |
| H | 9.73418500  | -1.40365200 | 1.00612300 |
| H | 10.22802400 | -0.65451700 | 2.53560200 |
| H | 9.38683000  | -2.21223800 | 2.54559200 |
| C | 7.67873500  | -0.30982100 | 3.60114300 |
| H | 7.56916500  | -1.27612900 | 4.10902700 |
| H | 8.43662600  | 0.27151400  | 4.14035800 |
| H | 6.72692200  | 0.22222100  | 3.66759700 |

#### TS4g

SCF Energy (a.u.) = -2642.336796

Thermal correction to Gibbs free energy (a.u.) = 0.910672

Charge = 0, Multiplicity = 1

|    |             |             |             |
|----|-------------|-------------|-------------|
| Ni | 4.25441400  | 0.92762400  | -0.45561400 |
| C  | 4.38040700  | -0.66627900 | -3.11158400 |
| C  | 3.30801400  | -1.01614300 | -3.94256100 |
| C  | 2.61268200  | -2.20876200 | -3.75950200 |
| C  | 2.97341500  | -3.10258900 | -2.73688700 |
| C  | 4.04182100  | -2.74234200 | -1.89904200 |
| C  | 4.74167700  | -1.55545800 | -2.09090100 |
| H  | 3.00339200  | -0.33401800 | -4.73290500 |
| H  | 1.77250000  | -2.44164100 | -4.40710800 |
| H  | 4.33457200  | -3.39853200 | -1.08435300 |
| H  | 5.56211600  | -1.31355700 | -1.42604200 |
| C  | 2.29809500  | -4.39013100 | -2.52449400 |
| C  | 1.50762400  | -5.03720300 | -3.39157500 |
| H  | 2.50658400  | -4.86145500 | -1.56366200 |
| H  | 1.06115600  | -5.99379500 | -3.13864800 |
| H  | 1.29244100  | -4.64890100 | -4.38356300 |
| C  | 1.29442800  | 3.34902700  | -0.56596800 |
| C  | 1.35869900  | 2.03089900  | -0.96258600 |
| C  | 2.51388600  | 1.49324200  | -1.58785900 |
| C  | 3.65702900  | 2.31595000  | -1.83652600 |
| C  | 3.58196300  | 3.67321700  | -1.37752000 |
| C  | 2.44087500  | 4.16380400  | -0.79480600 |
| H  | 0.53311400  | 1.36015600  | -0.77219900 |
| H  | 2.43391400  | 0.51007500  | -2.03671200 |
| H  | 4.44192200  | 4.31954100  | -1.53304300 |
| H  | 2.40638600  | 5.20769600  | -0.49042000 |
| C  | 4.91281300  | 1.69603700  | -2.17299500 |
| C  | 5.11270400  | 0.65067500  | -3.27560600 |
| H  | 6.18869100  | 0.43957500  | -3.31949300 |
| H  | 4.84974900  | 1.08697200  | -4.25080300 |
| C  | -1.29432700 | 3.62789400  | -0.51461400 |
| H  | -1.13238800 | 3.48237000  | -1.58896400 |
| C  | -1.87485000 | 2.32861500  | 0.03677800  |
| C  | -1.86607100 | 1.15442100  | -0.72031900 |

|    |             |             |             |
|----|-------------|-------------|-------------|
| C  | -2.41358600 | 2.26476900  | 1.32661300  |
| C  | -2.28524200 | -0.06229600 | -0.18461400 |
| H  | -1.48861100 | 1.17869600  | -1.73936600 |
| C  | -2.88200300 | 1.06056100  | 1.84591600  |
| H  | -2.48113800 | 3.16702000  | 1.92715100  |
| C  | -2.79783800 | -0.13499900 | 1.11833400  |
| H  | -2.20402200 | -0.95189200 | -0.79318000 |
| H  | -3.29920000 | 1.04141700  | 2.85011800  |
| C  | -4.27770400 | 6.75258500  | -0.11022700 |
| C  | -3.28273500 | 6.62002900  | 0.85761700  |
| C  | -2.30472500 | 5.63108700  | 0.73103600  |
| C  | -2.30576500 | 4.75673500  | -0.36244300 |
| C  | -3.31297900 | 4.89916400  | -1.32568200 |
| C  | -4.28879800 | 5.88655200  | -1.20595100 |
| H  | -5.03650800 | 7.52384900  | -0.01391000 |
| H  | -3.26323600 | 7.28816100  | 1.71434300  |
| H  | -1.53575200 | 5.54580500  | 1.49304900  |
| H  | -3.32988300 | 4.22185100  | -2.17632900 |
| H  | -5.05695100 | 5.98188600  | -1.96854000 |
| C  | -3.98771700 | -2.51144700 | 1.04368200  |
| C  | -3.16367000 | -1.43483700 | 1.80931000  |
| H  | -2.23295300 | -1.91349400 | 2.14203800  |
| H  | -3.71682600 | -1.19573400 | 2.72477600  |
| C  | -5.41786800 | -2.07314000 | 0.78317200  |
| C  | -6.47336200 | -2.87745900 | 1.22768500  |
| C  | -5.73340900 | -0.88228000 | 0.11180000  |
| C  | -7.80683700 | -2.51908300 | 1.02260400  |
| H  | -6.25348700 | -3.80672500 | 1.74722000  |
| C  | -7.05874800 | -0.50277700 | -0.10273900 |
| H  | -4.94146900 | -0.23852300 | -0.25079600 |
| C  | -8.07739400 | -1.32955600 | 0.35795200  |
| H  | -8.61188400 | -3.15340100 | 1.37557000  |
| H  | -7.28827400 | 0.42189200  | -0.61993100 |
| Br | -9.94138100 | -0.80406400 | 0.06111600  |

|   |             |             |             |
|---|-------------|-------------|-------------|
| C | -1.73103700 | -3.89063700 | -2.40287400 |
| C | -1.19826600 | -3.97542700 | -1.11442600 |
| C | -1.95515700 | -3.56787800 | -0.01917800 |
| C | -3.24755400 | -3.04436900 | -0.18412700 |
| C | -3.78315400 | -2.99928000 | -1.47450700 |
| C | -3.03017500 | -3.41729000 | -2.57557600 |
| H | -1.13159100 | -4.19503900 | -3.25521400 |
| H | -0.18915700 | -4.34986800 | -0.97380100 |
| H | -1.52560100 | -3.63542000 | 0.97720000  |
| H | -4.78540800 | -2.61532700 | -1.62742600 |
| H | -3.46288600 | -3.36065100 | -3.57080000 |
| H | -4.05187200 | -3.35143000 | 1.74896200  |
| C | 0.08944600  | 3.96722200  | 0.11400700  |
| H | 0.08235900  | 3.67743300  | 1.17292100  |
| H | 0.21690000  | 5.05464500  | 0.09134100  |
| O | 5.82407000  | 0.24185400  | 0.38894500  |
| C | 6.97512900  | 1.06597700  | 0.65369200  |
| C | 8.01248800  | 0.83091100  | -0.42891200 |
| H | 7.35401400  | 0.80174100  | 1.64358800  |
| H | 6.65826000  | 2.11403600  | 0.68314900  |
| H | 8.89281400  | 1.45967400  | -0.25173000 |
| H | 8.32780900  | -0.21746900 | -0.43640300 |
| H | 7.60563600  | 1.07525000  | -1.41435900 |
| H | 5.75764800  | 2.38566500  | -2.11377700 |
| C | 0.53245300  | 0.19422700  | 2.17448100  |
| C | 0.93790400  | -0.80722300 | 1.28919400  |
| C | 2.22939700  | -0.78110100 | 0.75927600  |
| C | 3.14686600  | 0.24124200  | 1.07963400  |
| C | 2.70803900  | 1.22958400  | 1.98338500  |
| C | 1.42305400  | 1.21199900  | 2.52703900  |
| H | -0.47291000 | 0.18904500  | 2.57963100  |
| H | 0.24181900  | -1.59087100 | 0.99880600  |
| H | 2.53117900  | -1.55626500 | 0.05870500  |
| H | 3.39138600  | 2.02561900  | 2.27168600  |

|   |            |             |            |
|---|------------|-------------|------------|
| H | 1.11000000 | 1.98744600  | 3.22277100 |
| C | 5.67954300 | -1.08452500 | 3.67914100 |
| C | 4.50567000 | -2.71019000 | 2.17921400 |
| C | 4.62173700 | -2.19850200 | 3.64497500 |
| H | 6.67207900 | -1.51170700 | 3.46757100 |
| H | 3.45058600 | -2.89780700 | 1.93858700 |
| B | 5.13162600 | -0.47068500 | 1.45128800 |
| O | 5.40308900 | -0.03959500 | 2.75170700 |
| O | 5.05069600 | -1.83752600 | 1.19656500 |
| H | 5.71493000 | -0.63165700 | 4.67579100 |
| H | 5.04717900 | -3.65685500 | 2.06832500 |
| C | 5.07966800 | -3.35149600 | 4.55076600 |
| H | 6.05680800 | -3.74164900 | 4.24128600 |
| H | 5.15790600 | -3.02498000 | 5.59465100 |
| H | 4.36114400 | -4.17920200 | 4.51726400 |
| C | 3.27593800 | -1.65576800 | 4.15113700 |
| H | 2.50474300 | -2.43356000 | 4.10535400 |
| H | 3.36408600 | -1.33071800 | 5.19528500 |
| H | 2.93498500 | -0.80677700 | 3.55926500 |

**im8g**

SCF Energy (a.u.) = -2642.362932

Thermal correction to Gibbs free energy (a.u.) = 0.911022

Charge = 0, Multiplicity = 1

|    |            |             |             |
|----|------------|-------------|-------------|
| Ni | 3.57748000 | -0.04392900 | -1.22001100 |
| C  | 4.49164500 | -2.87827900 | -1.79749200 |
| C  | 3.63673300 | -3.96090900 | -2.03990200 |
| C  | 3.01850200 | -4.64090600 | -0.99477800 |
| C  | 3.23723700 | -4.26280500 | 0.34123900  |
| C  | 4.12982700 | -3.20578800 | 0.58085900  |
| C  | 4.74411100 | -2.52482400 | -0.46620300 |
| H  | 3.43512000 | -4.25838200 | -3.06642800 |
| H  | 2.35729700 | -5.47231200 | -1.21987000 |
| H  | 4.32536300 | -2.89047000 | 1.60128400  |

|   |             |             |             |
|---|-------------|-------------|-------------|
| H | 5.42200500  | -1.70834900 | -0.24401400 |
| C | 2.57570900  | -4.91147800 | 1.48151700  |
| C | 1.59129700  | -5.81817000 | 1.44123000  |
| H | 2.93816400  | -4.58763700 | 2.45740400  |
| H | 1.17316000  | -6.23066600 | 2.35412600  |
| H | 1.16307600  | -6.17723000 | 0.50945300  |
| C | 0.68754500  | 1.05003000  | -3.09849700 |
| C | 0.90027900  | -0.24162900 | -2.67374400 |
| C | 2.19898400  | -0.81778900 | -2.64996300 |
| C | 3.32572400  | -0.12097000 | -3.21082200 |
| C | 3.06290000  | 1.21061500  | -3.69863500 |
| C | 1.80593100  | 1.75557200  | -3.63823700 |
| H | 0.08741600  | -0.83430900 | -2.27929500 |
| H | 2.27499800  | -1.87278500 | -2.41807100 |
| H | 3.88487600  | 1.77137000  | -4.13763300 |
| H | 1.64967000  | 2.76675000  | -4.00899700 |
| C | 4.64588000  | -0.58342000 | -2.93305800 |
| C | 5.07371300  | -2.05163400 | -2.92732600 |
| H | 6.16844500  | -2.07064900 | -2.84711900 |
| H | 4.83210400  | -2.53521300 | -3.88533300 |
| C | -1.95538700 | 1.08553800  | -3.05221600 |
| H | -1.97562300 | 0.63260000  | -4.05153700 |
| C | -2.25293200 | -0.01573400 | -2.04116100 |
| C | -3.20591400 | -0.98997900 | -2.36333500 |
| C | -1.66616100 | -0.06470100 | -0.77295000 |
| C | -3.58367600 | -1.96779200 | -1.44406300 |
| H | -3.67415800 | -0.96995800 | -3.34490400 |
| C | -2.02914600 | -1.05449000 | 0.13471100  |
| H | -0.90413400 | 0.64891900  | -0.48326300 |
| C | -3.00840400 | -2.00638100 | -0.16805600 |
| H | -4.34680500 | -2.68874600 | -1.71985800 |
| H | -1.55915400 | -1.05865700 | 1.11119100  |
| C | -5.10566200 | 4.06477700  | -2.86767100 |
| C | -4.30690100 | 3.80899100  | -1.74913100 |

|    |             |             |             |
|----|-------------|-------------|-------------|
| C  | -3.30410300 | 2.84330400  | -1.81054800 |
| C  | -3.07255200 | 2.12392500  | -2.99168400 |
| C  | -3.87365400 | 2.39041100  | -4.10506100 |
| C  | -4.88669800 | 3.35122100  | -4.04545900 |
| H  | -5.89088600 | 4.81401900  | -2.81927700 |
| H  | -4.46391100 | 4.35960600  | -0.82508800 |
| H  | -2.70464600 | 2.63719000  | -0.92883200 |
| H  | -3.70366600 | 1.84009500  | -5.02763300 |
| H  | -5.50217600 | 3.54081500  | -4.92083700 |
| C  | -4.74376000 | -2.40188900 | 1.69859300  |
| C  | -3.48626200 | -2.93531900 | 0.92406900  |
| H  | -3.68232900 | -3.94391900 | 0.54813400  |
| H  | -2.68481500 | -3.03640500 | 1.66330600  |
| C  | -4.54000400 | -0.91615500 | 1.95657400  |
| C  | -3.76932900 | -0.49326400 | 3.04293900  |
| C  | -4.95414000 | 0.04003600  | 1.02131000  |
| C  | -3.37192900 | 0.83956800  | 3.17694500  |
| H  | -3.43979500 | -1.21942300 | 3.78251500  |
| C  | -4.57598000 | 1.37519900  | 1.13472100  |
| H  | -5.54455600 | -0.26720500 | 0.16575300  |
| C  | -3.76987600 | 1.74776500  | 2.20379400  |
| H  | -2.75734000 | 1.15413800  | 4.01276900  |
| H  | -4.87491300 | 2.09305200  | 0.38159600  |
| Br | -3.14450100 | 3.60393400  | 2.31445900  |
| C  | -8.67765700 | -3.29847800 | 0.06738600  |
| C  | -7.55490200 | -3.93172200 | -0.46012000 |
| C  | -6.28152100 | -3.64584800 | 0.03995700  |
| C  | -6.10022200 | -2.71756100 | 1.07049400  |
| C  | -7.24399600 | -2.09548400 | 1.59775500  |
| C  | -8.51548000 | -2.37875800 | 1.10601200  |
| H  | -9.66733000 | -3.51831000 | -0.32273000 |
| H  | -7.66256400 | -4.65294000 | -1.26569100 |
| H  | -5.43127500 | -4.16461200 | -0.38634700 |
| H  | -7.12924600 | -1.37193400 | 2.39956000  |

|   |             |             |             |
|---|-------------|-------------|-------------|
| H | -9.38064800 | -1.87905500 | 1.53317700  |
| H | -4.73058400 | -2.91075900 | 2.67305300  |
| C | -0.60250600 | 1.81654400  | -2.90018800 |
| H | -0.56451100 | 2.28026700  | -1.90450500 |
| H | -0.62098800 | 2.65665900  | -3.60463200 |
| O | 5.10082300  | 0.89615600  | -0.21887000 |
| C | 5.69396500  | 1.99788400  | -0.95338300 |
| C | 7.15821500  | 1.71000200  | -1.22713700 |
| H | 5.56391100  | 2.91244400  | -0.37139700 |
| H | 5.11890100  | 2.08254500  | -1.87562000 |
| H | 7.59407000  | 2.51250600  | -1.83309100 |
| H | 7.71982400  | 1.64500100  | -0.28951100 |
| H | 7.26561600  | 0.76512800  | -1.76887300 |
| H | 5.43569500  | 0.09336200  | -3.25993000 |
| C | 0.23970500  | 1.25122500  | 1.93317600  |
| C | 0.75480100  | -0.04740700 | 1.96399100  |
| C | 1.73334800  | -0.44427200 | 1.04646600  |
| C | 2.23867200  | 0.43463000  | 0.06996400  |
| C | 1.70454600  | 1.73873000  | 0.06547300  |
| C | 0.72275300  | 2.14823200  | 0.97772700  |
| H | -0.53371300 | 1.55862600  | 2.63057400  |
| H | 0.38555000  | -0.75830800 | 2.70200300  |
| H | 2.10755400  | -1.46448800 | 1.09008400  |
| H | 2.04553800  | 2.45196900  | -0.68399000 |
| H | 0.32801200  | 3.16162000  | 0.94098400  |
| C | 5.80003100  | 1.93649200  | 3.22266900  |
| C | 4.68014700  | -0.27156500 | 3.22605100  |
| C | 4.65654900  | 1.13198500  | 3.85496200  |
| H | 6.77211000  | 1.49132800  | 3.47627200  |
| H | 3.74616500  | -0.80081800 | 3.44104300  |
| B | 5.18927100  | 0.88915200  | 1.16742800  |
| O | 5.68030900  | 1.99553300  | 1.79665200  |
| O | 4.82232500  | -0.25044200 | 1.80363700  |
| H | 5.79329200  | 2.96893200  | 3.58503300  |

|   |            |             |            |
|---|------------|-------------|------------|
| H | 5.51352400 | -0.85810100 | 3.63419200 |
| C | 4.89946600 | 1.00611400  | 5.36427300 |
| H | 5.87260800 | 0.54996000  | 5.58290000 |
| H | 4.86893900 | 1.99032700  | 5.84512700 |
| H | 4.12350200 | 0.38747100  | 5.82927200 |
| C | 3.31168900 | 1.82665300  | 3.58953300 |
| H | 2.49418700 | 1.27292900  | 4.05967900 |
| H | 3.31995700 | 2.84216600  | 4.00279300 |
| H | 3.07629500 | 1.89614000  | 2.52536100 |

**im9g**

SCF Energy (a.u.) = -2427.934730

Thermal correction to Gibbs free energy (a.u.) = 0.871929

Charge = 0, Multiplicity = 1

|    |              |             |             |
|----|--------------|-------------|-------------|
| Ni | -3.24754300  | -1.79839500 | -0.13497300 |
| C  | -6.21285400  | 1.24503000  | 0.44774900  |
| C  | -7.28856500  | 1.03904200  | -0.42954900 |
| C  | -8.08520300  | 2.09202100  | -0.86195800 |
| C  | -7.83533200  | 3.40732600  | -0.43217900 |
| C  | -6.75879100  | 3.61092200  | 0.44622400  |
| C  | -5.96328200  | 2.55333700  | 0.87893800  |
| H  | -7.50387500  | 0.02872600  | -0.77284200 |
| H  | -8.91226800  | 1.89160800  | -1.53677100 |
| H  | -6.54571300  | 4.61889600  | 0.79491500  |
| H  | -5.13211900  | 2.74478600  | 1.55047600  |
| C  | -8.64247400  | 4.56002700  | -0.85385300 |
| C  | -9.70086300  | 4.55924100  | -1.67444100 |
| H  | -8.31923400  | 5.51329800  | -0.43526300 |
| H  | -10.22129000 | 5.48080400  | -1.91573800 |
| H  | -10.08800300 | 3.65360500  | -2.13337200 |
| C  | -1.04707800  | 3.00250900  | -0.04194600 |
| C  | -1.60548800  | 2.51051800  | 1.14644100  |
| C  | -2.60445800  | 1.54308400  | 1.13113900  |
| C  | -3.11760900  | 1.04035100  | -0.08015700 |

|   |             |             |             |
|---|-------------|-------------|-------------|
| C | -2.61071300 | 1.60440800  | -1.26231000 |
| C | -1.58381200 | 2.54530400  | -1.24684500 |
| H | -1.22391300 | 2.86163400  | 2.10337400  |
| H | -2.97330900 | 1.15038500  | 2.07180700  |
| H | -3.03393500 | 1.30288500  | -2.21748700 |
| H | -1.18428600 | 2.92045300  | -2.18608700 |
| C | -4.13723600 | -0.05073600 | -0.13677200 |
| C | -5.31574000 | 0.09553600  | 0.84493900  |
| H | -4.95041300 | 0.22927600  | 1.86555000  |
| H | -5.89951500 | -0.83337400 | 0.84586500  |
| C | 1.40542200  | 3.09120600  | 0.50903200  |
| H | 1.14868100  | 2.78440500  | 1.53087500  |
| C | 1.62301200  | 1.80605500  | -0.27964000 |
| C | 1.05615400  | 0.60763100  | 0.16924900  |
| C | 2.38661100  | 1.77975500  | -1.45069400 |
| C | 1.30524900  | -0.59459100 | -0.48570400 |
| H | 0.42257600  | 0.61933600  | 1.04925400  |
| C | 2.65660000  | 0.57234800  | -2.09321600 |
| H | 2.82975900  | 2.69854400  | -1.82367800 |
| C | 2.16468500  | -0.63917700 | -1.59293400 |
| H | 0.88831100  | -1.51305400 | -0.08784900 |
| H | 3.32110900  | 0.56073700  | -2.95335800 |
| C | 5.18483300  | 5.20421600  | 0.76417100  |
| C | 4.97922600  | 4.00288300  | 1.45041200  |
| C | 3.74969200  | 3.35584600  | 1.36591600  |
| C | 2.69876900  | 3.88723000  | 0.60120300  |
| C | 2.91403400  | 5.09198100  | -0.07270100 |
| C | 4.14843500  | 5.74575100  | 0.00739700  |
| H | 6.14337700  | 5.71131200  | 0.82485700  |
| H | 5.77664900  | 3.57612700  | 2.05316900  |
| H | 3.59426200  | 2.41683000  | 1.89269100  |
| H | 2.12025300  | 5.53213300  | -0.66733500 |
| H | 4.29511400  | 6.68082000  | -0.52625900 |
| C | 3.71753200  | -2.62664800 | -1.08370900 |

|    |             |             |             |
|----|-------------|-------------|-------------|
| C  | 2.71112300  | -1.95009500 | -2.09222100 |
| H  | 1.90692400  | -2.66958800 | -2.28431800 |
| H  | 3.24149100  | -1.79586200 | -3.03835300 |
| C  | 4.91954900  | -1.74135400 | -0.80016400 |
| C  | 6.18433100  | -2.15437200 | -1.23659500 |
| C  | 4.82490200  | -0.49231100 | -0.16218700 |
| C  | 7.32127200  | -1.36369500 | -1.05822400 |
| H  | 6.28920500  | -3.11587900 | -1.73312700 |
| C  | 5.94474900  | 0.31873400  | 0.02030300  |
| H  | 3.87113000  | -0.12358500 | 0.18968000  |
| C  | 7.17862900  | -0.13120100 | -0.43288000 |
| H  | 8.29109700  | -1.70223400 | -1.40443300 |
| H  | 5.84110800  | 1.29058000  | 0.48931600  |
| Br | 8.75498800  | 1.00705600  | -0.18728900 |
| C  | 1.33922200  | -4.11161300 | 2.23757200  |
| C  | 1.29185700  | -4.71800500 | 0.97974500  |
| C  | 2.10264700  | -4.24760300 | -0.05191300 |
| C  | 2.97188000  | -3.16194900 | 0.13726500  |
| C  | 3.04774000  | -2.60107700 | 1.41605400  |
| C  | 2.23414500  | -3.06511500 | 2.45244500  |
| H  | 0.69155600  | -4.45375700 | 3.03874100  |
| H  | 0.62053200  | -5.55329000 | 0.80113200  |
| H  | 2.05625600  | -4.72646700 | -1.02769700 |
| H  | 3.73622900  | -1.78876500 | 1.61056300  |
| H  | 2.29839100  | -2.59859000 | 3.43140900  |
| H  | 4.09774200  | -3.50563900 | -1.61972000 |
| C  | 0.18047200  | 3.88101800  | -0.02186900 |
| H  | 0.38481900  | 4.24086200  | -1.03645600 |
| H  | 0.03413800  | 4.76397400  | 0.61398000  |
| H  | -4.56814600 | -0.05882200 | -1.14748500 |
| C  | -1.99072400 | -1.71124500 | 4.39938000  |
| C  | -3.31272600 | -2.02035500 | 4.07395600  |
| C  | -3.73687500 | -1.99651300 | 2.74020700  |
| C  | -2.85673800 | -1.66035200 | 1.70088100  |

|   |             |             |             |
|---|-------------|-------------|-------------|
| C | -1.53032600 | -1.35698300 | 2.05087300  |
| C | -1.09680500 | -1.38141300 | 3.37825900  |
| H | -1.66198500 | -1.72846000 | 5.43515500  |
| H | -4.01913500 | -2.28028500 | 4.85940500  |
| H | -4.77456200 | -2.23701200 | 2.51766600  |
| H | -0.82240700 | -1.08920000 | 1.27397500  |
| H | -0.06086900 | -1.14381900 | 3.60963600  |
| C | -3.99818800 | -2.46097300 | -2.30568300 |
| C | -2.82188100 | -1.78364200 | -2.40784200 |
| C | -1.41953900 | -2.33519900 | -2.50299800 |
| C | -1.18239900 | -3.67575700 | -1.77148300 |
| C | -1.77653000 | -3.70526400 | -0.38251800 |
| C | -3.02342400 | -4.11643200 | -0.02548300 |
| C | -4.14221300 | -4.60114700 | -0.91690100 |
| C | -4.18709100 | -3.96271000 | -2.32411100 |
| H | -4.91227900 | -1.87042000 | -2.31723500 |
| H | -2.87940000 | -0.70735800 | -2.53164200 |
| H | -0.74461700 | -1.57964700 | -2.08488800 |
| H | -1.13423300 | -2.43988600 | -3.56091700 |
| H | -1.55683100 | -4.51033400 | -2.36894900 |
| H | -0.10197800 | -3.82403400 | -1.67976800 |
| H | -1.09893600 | -3.44510000 | 0.42601400  |
| H | -3.22576700 | -4.18816000 | 1.04052000  |
| H | -5.08713700 | -4.38554300 | -0.40304800 |
| H | -4.09744600 | -5.69635900 | -1.01527300 |
| H | -3.44434900 | -4.42800700 | -2.97557100 |
| H | -5.16303000 | -4.18609600 | -2.76920100 |

### TS5g

SCF Energy (a.u.) = -2427.899016

Thermal correction to Gibbs free energy (a.u.) = 0.872955

Charge = 0, Multiplicity = 1

|    |             |             |             |
|----|-------------|-------------|-------------|
| Ni | -3.40271000 | -1.91366200 | -0.80285700 |
| C  | -5.65926200 | 1.87394000  | 0.34690200  |

|   |             |             |             |
|---|-------------|-------------|-------------|
| C | -5.70539600 | 3.13004800  | -0.27709100 |
| C | -5.66694900 | 4.30791400  | 0.45721600  |
| C | -5.58298300 | 4.27840300  | 1.86017900  |
| C | -5.55933300 | 3.01997600  | 2.48277300  |
| C | -5.60135900 | 1.83974400  | 1.74443600  |
| H | -5.74925000 | 3.17896400  | -1.36216400 |
| H | -5.69770800 | 5.25982800  | -0.06408600 |
| H | -5.50330600 | 2.96811200  | 3.56771500  |
| H | -5.56182100 | 0.88618400  | 2.25708700  |
| C | -5.52335300 | 5.48917100  | 2.69029900  |
| C | -5.50856500 | 6.76163800  | 2.27359500  |
| H | -5.48389100 | 5.29926300  | 3.76297000  |
| H | -5.46112200 | 7.58139000  | 2.98357000  |
| H | -5.54169300 | 7.03616400  | 1.22285900  |
| C | -0.92573000 | 2.70573200  | -1.84418300 |
| C | -1.63702900 | 2.85576200  | -0.64840400 |
| C | -2.70982200 | 2.02839000  | -0.32962000 |
| C | -3.14690300 | 1.03036400  | -1.22226100 |
| C | -2.47115000 | 0.93567600  | -2.45105800 |
| C | -1.37618200 | 1.74114900  | -2.75079200 |
| H | -1.32141200 | 3.60657200  | 0.07306200  |
| H | -3.19295700 | 2.14260000  | 0.63036400  |
| H | -2.79632800 | 0.19411500  | -3.17522300 |
| H | -0.84763000 | 1.60166600  | -3.69064900 |
| C | -4.23144100 | 0.05869700  | -0.88716000 |
| C | -5.62708400 | 0.62503400  | -0.50244700 |
| H | -6.21114000 | -0.17019600 | -0.03073400 |
| H | -6.13970400 | 0.85939800  | -1.44553400 |
| C | 1.44830500  | 2.96998400  | -1.05949800 |
| H | 1.03160100  | 3.14842600  | -0.06028300 |
| C | 1.67675700  | 1.46746100  | -1.16881700 |
| C | 0.92610500  | 0.58037000  | -0.38690200 |
| C | 2.62992500  | 0.93348600  | -2.04062200 |
| C | 1.15742800  | -0.79163200 | -0.42792700 |

|    |            |             |             |
|----|------------|-------------|-------------|
| H  | 0.16120800 | 0.97379000  | 0.27452700  |
| C  | 2.87978400 | -0.43742600 | -2.06433800 |
| H  | 3.22389100 | 1.59913500  | -2.65980800 |
| C  | 2.18069300 | -1.31858100 | -1.23154400 |
| H  | 0.58236300 | -1.43885600 | 0.22376500  |
| H  | 3.67737900 | -0.82392900 | -2.69371300 |
| C  | 5.28748900 | 4.98297300  | -1.16928700 |
| C  | 4.90788500 | 4.20818100  | -0.06854400 |
| C  | 3.66207600 | 3.58802500  | -0.05187800 |
| C  | 2.76755500 | 3.72404500  | -1.12535200 |
| C  | 3.15581400 | 4.50575400  | -2.21630500 |
| C  | 4.40716500 | 5.13096000  | -2.23858300 |
| H  | 6.25964400 | 5.46699900  | -1.18791000 |
| H  | 5.58296000 | 4.09223300  | 0.77524600  |
| H  | 3.37110800 | 2.97850100  | 0.80089600  |
| H  | 2.48540700 | 4.63347000  | -3.06000700 |
| H  | 4.69006600 | 5.73354900  | -3.09740200 |
| C  | 3.32558400 | -3.03541500 | 0.31274600  |
| C  | 2.65377300 | -2.74171700 | -1.07836500 |
| H  | 1.83096100 | -3.45059400 | -1.20711100 |
| H  | 3.39243500 | -2.96451600 | -1.85615200 |
| C  | 4.54242800 | -2.15272700 | 0.53377600  |
| C  | 5.81477900 | -2.73576500 | 0.55342900  |
| C  | 4.46127300 | -0.75454300 | 0.65378900  |
| C  | 6.97544800 | -1.96907100 | 0.67780000  |
| H  | 5.90807900 | -3.81521500 | 0.46313500  |
| C  | 5.60634600 | 0.03251700  | 0.77066100  |
| H  | 3.49978800 | -0.25846100 | 0.64510400  |
| C  | 6.84917600 | -0.58932000 | 0.77890300  |
| H  | 7.95175400 | -2.43995500 | 0.68920600  |
| H  | 5.52219200 | 1.11157900  | 0.83258400  |
| Br | 8.46308200 | 0.51233400  | 0.93162900  |
| C  | 0.19000700 | -3.05101400 | 3.32639100  |
| C  | 0.20097000 | -3.98185500 | 2.28507600  |

|   |             |             |             |
|---|-------------|-------------|-------------|
| C | 1.23955100  | -3.97828700 | 1.35722400  |
| C | 2.28262100  | -3.04045700 | 1.43029800  |
| C | 2.28089600  | -2.14297800 | 2.50183400  |
| C | 1.24290300  | -2.14526200 | 3.43789400  |
| H | -0.63098500 | -3.03405500 | 4.03583700  |
| H | -0.60136300 | -4.70917000 | 2.19721100  |
| H | 1.23438700  | -4.70902400 | 0.55204000  |
| H | 3.08820600  | -1.42868200 | 2.60859000  |
| H | 1.25940400  | -1.42786600 | 4.25397900  |
| H | 3.69687900  | -4.06567700 | 0.23286100  |
| C | 0.36825000  | 3.45048300  | -2.06628200 |
| H | 0.71830900  | 3.28339300  | -3.09108300 |
| H | 0.23135500  | 4.53210900  | -1.93877700 |
| H | -4.44621800 | -0.53756600 | -1.80000500 |
| C | -3.20551500 | -1.07229700 | 3.55495900  |
| C | -4.45455300 | -1.46068300 | 3.04828900  |
| C | -4.71546800 | -1.40432500 | 1.68279400  |
| C | -3.72355600 | -0.97514800 | 0.76572500  |
| C | -2.48142100 | -0.55746600 | 1.30013600  |
| C | -2.22282400 | -0.62793900 | 2.67155900  |
| H | -3.01189600 | -1.10979600 | 4.62330200  |
| H | -5.22807800 | -1.81456600 | 3.72647200  |
| H | -5.68679800 | -1.72861100 | 1.31754300  |
| H | -1.71452100 | -0.17996300 | 0.63322800  |
| H | -1.24762200 | -0.32644300 | 3.04414200  |
| C | -2.80058500 | -2.72503200 | -3.12228500 |
| C | -1.67067400 | -2.58148300 | -2.38407900 |
| C | -0.97194100 | -3.63995900 | -1.56154800 |
| C | -1.87534700 | -4.69219500 | -0.87284800 |
| C | -3.10197800 | -4.10792900 | -0.20329500 |
| C | -4.32655800 | -3.90273700 | -0.79749600 |
| C | -4.70949900 | -4.20668100 | -2.23154900 |
| C | -3.60076300 | -3.99561400 | -3.29884200 |
| H | -3.13667500 | -1.86624900 | -3.70026800 |

|   |             |             |             |
|---|-------------|-------------|-------------|
| H | -1.15842000 | -1.62050700 | -2.42400400 |
| H | -0.40681000 | -3.12238300 | -0.78300700 |
| H | -0.22552200 | -4.15927800 | -2.18327100 |
| H | -2.16600200 | -5.46981100 | -1.58409100 |
| H | -1.26794200 | -5.19642100 | -0.11278100 |
| H | -3.04119100 | -3.96400000 | 0.87312200  |
| H | -5.16718300 | -3.68268600 | -0.14116800 |
| H | -5.56466100 | -3.56866400 | -2.48635300 |
| H | -5.07387100 | -5.24289100 | -2.31305000 |
| H | -2.92977600 | -4.85737500 | -3.31350400 |
| H | -4.08444100 | -3.97519500 | -4.28217900 |

**im10g**

SCF Energy (a.u.) = -2427.966602

Thermal correction to Gibbs free energy (a.u.) = 0.872608

Charge = 0, Multiplicity = 1

|    |             |             |             |
|----|-------------|-------------|-------------|
| Ni | -2.91731200 | -1.03802600 | -1.73299600 |
| C  | -5.71599800 | 1.13146600  | 1.77082800  |
| C  | -5.54820900 | 2.30414200  | 2.52429300  |
| C  | -5.22998600 | 2.26154100  | 3.87646800  |
| C  | -5.07030600 | 1.03231600  | 4.53929900  |
| C  | -5.26502600 | -0.13905100 | 3.78967300  |
| C  | -5.58663600 | -0.09527800 | 2.43595500  |
| H  | -5.65707100 | 3.26758800  | 2.03194300  |
| H  | -5.10838900 | 3.19217300  | 4.42255700  |
| H  | -5.16130900 | -1.10415200 | 4.28008800  |
| H  | -5.73762500 | -1.02240100 | 1.89440600  |
| C  | -4.72156200 | 0.92251200  | 5.96227100  |
| C  | -4.45980800 | 1.92078000  | 6.81550600  |
| H  | -4.67398500 | -0.09987100 | 6.33732600  |
| H  | -4.21142000 | 1.71860100  | 7.85265900  |
| H  | -4.48102100 | 2.96639400  | 6.52081600  |
| C  | -1.39376000 | 3.22554000  | -1.19934000 |
| C  | -1.93161200 | 2.98711400  | 0.07174200  |

|   |             |             |             |
|---|-------------|-------------|-------------|
| C | -3.07438900 | 2.21113200  | 0.24538300  |
| C | -3.75416000 | 1.66847000  | -0.85504100 |
| C | -3.24310800 | 1.94749900  | -2.12925600 |
| C | -2.07578900 | 2.69409000  | -2.29750500 |
| H | -1.44677300 | 3.40306300  | 0.95085500  |
| H | -3.43318100 | 2.02524400  | 1.24879200  |
| H | -3.76474100 | 1.56808800  | -3.00118300 |
| H | -1.69276700 | 2.86908700  | -3.30022300 |
| C | -4.95351900 | 0.74348700  | -0.72477800 |
| C | -6.04333200 | 1.20604600  | 0.29715100  |
| H | -6.92622200 | 0.58438500  | 0.10403400  |
| H | -6.32255700 | 2.23487300  | 0.04078500  |
| C | 1.03132600  | 3.63961000  | -0.46324600 |
| H | 0.66872300  | 3.71410500  | 0.56901900  |
| C | 1.43059200  | 2.18782000  | -0.68656300 |
| C | 0.97938300  | 1.17952000  | 0.17255000  |
| C | 2.24510700  | 1.81943300  | -1.76159600 |
| C | 1.31866100  | -0.15509700 | -0.03779300 |
| H | 0.33967100  | 1.43832800  | 1.01106600  |
| C | 2.59773700  | 0.48618300  | -1.96291400 |
| H | 2.62967000  | 2.58533700  | -2.42945300 |
| C | 2.14306400  | -0.52688200 | -1.11003600 |
| H | 0.93712000  | -0.90590100 | 0.64199000  |
| H | 3.24541400  | 0.22556500  | -2.79634900 |
| C | 4.55642600  | 6.16371900  | -0.66369200 |
| C | 4.37548100  | 5.25414700  | 0.38242400  |
| C | 3.23164000  | 4.46289900  | 0.42734900  |
| C | 2.24201200  | 4.56004100  | -0.56254700 |
| C | 2.43418200  | 5.47317700  | -1.60352700 |
| C | 3.58292500  | 6.26920600  | -1.65425600 |
| H | 5.44827700  | 6.78256400  | -0.70306200 |
| H | 5.12703200  | 5.16306200  | 1.16188600  |
| H | 3.09921600  | 3.74706100  | 1.23530000  |
| H | 1.68881800  | 5.57580100  | -2.38498900 |

|    |             |             |             |
|----|-------------|-------------|-------------|
| H  | 3.71163600  | 6.97260500  | -2.47242000 |
| C  | 3.17130400  | -2.80198200 | -0.26039700 |
| C  | 2.51108300  | -1.96416500 | -1.39939200 |
| H  | 1.60609200  | -2.49532900 | -1.71738400 |
| H  | 3.19699000  | -1.98283800 | -2.25380500 |
| C  | 4.52767600  | -2.26208500 | 0.15684700  |
| C  | 5.64856500  | -3.09656800 | 0.07344600  |
| C  | 4.71790200  | -0.94948500 | 0.61633700  |
| C  | 6.92399800  | -2.65363600 | 0.42745400  |
| H  | 5.52725400  | -4.11836900 | -0.27730000 |
| C  | 5.98367200  | -0.48463000 | 0.97485200  |
| H  | 3.87550600  | -0.27412900 | 0.69578300  |
| C  | 7.06999300  | -1.34608300 | 0.87350300  |
| H  | 7.78032300  | -3.31420300 | 0.35401400  |
| H  | 6.11544500  | 0.53317200  | 1.32395200  |
| Br | 8.85089600  | -0.69947600 | 1.37242300  |
| C  | 0.25969300  | -3.54769900 | 2.87878200  |
| C  | 0.08496300  | -4.06229800 | 1.59115200  |
| C  | 1.04724700  | -3.82943700 | 0.61140300  |
| C  | 2.19807800  | -3.07481800 | 0.88628200  |
| C  | 2.37641300  | -2.59181900 | 2.18614500  |
| C  | 1.41282400  | -2.82066100 | 3.17209500  |
| H  | -0.48985500 | -3.72240600 | 3.64523700  |
| H  | -0.79985400 | -4.64433400 | 1.34892300  |
| H  | 0.89690400  | -4.23158800 | -0.38683100 |
| H  | 3.26634500  | -2.02349900 | 2.43160100  |
| H  | 1.56806800  | -2.42704900 | 4.17279200  |
| H  | 3.36306900  | -3.77858400 | -0.72433900 |
| C  | -0.13845700 | 4.04889700  | -1.38876700 |
| H  | 0.18135600  | 3.96557400  | -2.43363400 |
| H  | -0.35973600 | 5.11061100  | -1.21133700 |
| H  | -5.46783100 | 0.76987200  | -1.69506200 |
| C  | -4.18564800 | -3.31373600 | 0.59742500  |
| C  | -5.36899000 | -2.98686300 | -0.12540000 |

|   |             |             |             |
|---|-------------|-------------|-------------|
| C | -5.53490100 | -1.72334800 | -0.63760000 |
| C | -4.52463200 | -0.71235300 | -0.50357800 |
| C | -3.34407600 | -1.03950200 | 0.25599400  |
| C | -3.21835800 | -2.35704200 | 0.79867900  |
| H | -4.06949600 | -4.30863300 | 1.01923300  |
| H | -6.14642200 | -3.73504100 | -0.25525500 |
| H | -6.45505900 | -1.46690300 | -1.16010800 |
| H | -2.72495600 | -0.25612200 | 0.68116000  |
| H | -2.33947500 | -2.58629300 | 1.39537900  |
| C | -0.94439400 | -0.83460000 | -2.45750800 |
| C | -1.04224300 | -1.98711400 | -1.70788000 |
| C | -1.37147700 | -3.36878300 | -2.22667400 |
| C | -2.39681600 | -3.38279300 | -3.39254500 |
| C | -3.50071000 | -2.35145500 | -3.22876200 |
| C | -3.49225500 | -1.08318100 | -3.78031400 |
| C | -2.35510100 | -0.47894100 | -4.57739800 |
| C | -0.95234700 | -0.75923000 | -3.97338400 |
| H | -0.60061000 | 0.05900200  | -1.94273300 |
| H | -0.71921800 | -1.94873900 | -0.67281600 |
| H | -1.79081900 | -3.93486300 | -1.38621900 |
| H | -0.46265800 | -3.90721500 | -2.54157100 |
| H | -1.88303700 | -3.23215400 | -4.34619500 |
| H | -2.84730300 | -4.38072600 | -3.44356300 |
| H | -4.44243100 | -2.72937800 | -2.83905300 |
| H | -4.44226200 | -0.55174100 | -3.82947600 |
| H | -2.50937700 | 0.60502400  | -4.61680200 |
| H | -2.37625700 | -0.82379300 | -5.62304500 |
| H | -0.54340600 | -1.68426600 | -4.39084900 |
| H | -0.26849800 | 0.03866100  | -4.28503200 |

**ima1**

SCF Energy (a.u.) = -1076.873593

Thermal correction to Gibbs free energy (a.u.) = 0.151000

Charge = 0, Multiplicity = 1

|    |             |             |             |
|----|-------------|-------------|-------------|
| C  | -0.69219100 | 1.97865200  | 0.32621900  |
| C  | -1.95750900 | 1.41699700  | 0.36373000  |
| C  | -2.17766800 | 0.15662100  | -0.20526100 |
| C  | -1.13937200 | -0.52425500 | -0.83027600 |
| C  | 0.13895800  | 0.03468400  | -0.85587300 |
| C  | 0.43665200  | 1.31387600  | -0.26507800 |
| H  | -0.53935100 | 2.96277800  | 0.76511000  |
| H  | -2.77788600 | 1.95712900  | 0.82633300  |
| H  | -1.31646600 | -1.48942300 | -1.29593000 |
| H  | 0.93258800  | -0.51509500 | -1.35778100 |
| C  | 1.74965500  | 1.82935000  | -0.16394000 |
| C  | 2.88931900  | 1.22249900  | -0.86445100 |
| Br | -3.96888300 | -0.65813400 | -0.10741300 |
| H  | 2.64675900  | 0.85085600  | -1.87526700 |
| H  | 1.88361700  | 2.82002400  | 0.26221500  |
| K  | 1.66396700  | -0.37084800 | 1.69005500  |
| H  | 3.73543700  | 1.91638900  | -0.94623900 |
| O  | 3.41740400  | 0.00667400  | -0.15035800 |
| C  | 4.44267900  | -0.65310600 | -0.86611500 |
| H  | 5.31511200  | 0.01156300  | -0.98083000 |
| H  | 4.09429000  | -0.90522900 | -1.88161200 |
| C  | 4.83756700  | -1.91803700 | -0.11850900 |
| H  | 5.63484900  | -2.45274500 | -0.64667800 |
| H  | 5.19915200  | -1.67620100 | 0.88793000  |
| H  | 3.97966400  | -2.59632300 | -0.02862500 |

**imb1**

SCF Energy (a.u.) = -1399.327317

Thermal correction to Gibbs free energy (a.u.) = 0.257324

Charge = 0, Multiplicity = 1

|   |            |            |             |
|---|------------|------------|-------------|
| C | 1.29100500 | 0.99459600 | -1.97664200 |
| C | 0.41471400 | 1.96088300 | -1.49303700 |
| C | 0.47899900 | 2.32942800 | -0.14964700 |
| C | 1.45544200 | 1.78520700 | 0.68830700  |

|    |             |             |             |
|----|-------------|-------------|-------------|
| C  | 2.32109600  | 0.81247200  | 0.20666200  |
| C  | 2.25438300  | 0.32376900  | -1.14364500 |
| H  | 1.26116900  | 0.74610500  | -3.03878300 |
| H  | -0.30312400 | 2.42971500  | -2.15944900 |
| H  | 1.54853500  | 2.13280400  | 1.71357100  |
| H  | 3.10831000  | 0.44424300  | 0.85501800  |
| C  | 2.98502300  | -0.80196300 | -1.60588500 |
| C  | 4.04120000  | -1.42292600 | -0.76384200 |
| Br | -0.81367900 | 3.63088700  | 0.57207300  |
| H  | 3.65401700  | -1.69191600 | 0.23854000  |
| H  | 4.40521600  | -2.35703600 | -1.22452100 |
| O  | 5.17105700  | -0.54632800 | -0.55825100 |
| C  | 6.15863800  | -1.11723400 | 0.26776800  |
| H  | 6.54976500  | -2.04967200 | -0.18061400 |
| H  | 5.72855200  | -1.39651000 | 1.24897000  |
| C  | 7.28132000  | -0.10871300 | 0.45406500  |
| H  | 8.07050400  | -0.51732900 | 1.09579300  |
| H  | 7.71954600  | 0.15515500  | -0.51389700 |
| H  | 6.89584700  | 0.80761900  | 0.91302000  |
| C  | 1.22066300  | -2.87178100 | 2.14144600  |
| C  | 0.52080700  | -1.72766400 | 2.12779200  |
| H  | 3.13723700  | -0.86371000 | -2.68561500 |
| H  | 2.23347300  | -2.90000400 | 2.52898000  |
| C  | -0.83460500 | -1.54286600 | 1.57979900  |
| C  | -1.29079000 | -0.23707700 | 1.31980300  |
| C  | -1.67073800 | -2.62124000 | 1.22037900  |
| C  | -2.50212400 | -0.00345500 | 0.66616400  |
| H  | -0.66592400 | 0.60997900  | 1.57582300  |
| C  | -2.88805800 | -2.40478500 | 0.57510000  |
| H  | -1.37434900 | -3.63992600 | 1.45358600  |
| C  | -3.28088000 | -1.09441900 | 0.29007900  |
| H  | -2.81190300 | 1.01285300  | 0.45057100  |
| H  | -3.52530500 | -3.24034200 | 0.30657500  |
| H  | 0.81945600  | -3.81444300 | 1.77569800  |

|    |             |             |             |
|----|-------------|-------------|-------------|
| H  | 1.00131600  | -0.81736400 | 2.47819100  |
| K  | 0.29162900  | -1.76184200 | -1.36274800 |
| Br | -4.96055900 | -0.79425800 | -0.65496500 |

### TSb1

SCF Energy (a.u.) = -1399.321850

Thermal correction to Gibbs free energy (a.u.) = 0.260748

Charge = 0, Multiplicity = 1

|    |             |             |             |
|----|-------------|-------------|-------------|
| C  | -1.68757400 | 0.67296100  | 1.87443400  |
| C  | -1.22015100 | 1.94609900  | 1.57989000  |
| C  | -1.36615900 | 2.45477600  | 0.27915900  |
| C  | -2.00701100 | 1.69779700  | -0.70672300 |
| C  | -2.45766300 | 0.41287800  | -0.41217100 |
| C  | -2.34326500 | -0.16104400 | 0.90348300  |
| H  | -1.58280900 | 0.29933100  | 2.89047000  |
| H  | -0.74959700 | 2.54694600  | 2.35232000  |
| H  | -2.16447100 | 2.11231400  | -1.69853300 |
| H  | -3.01369600 | -0.12533000 | -1.17023800 |
| C  | -2.80740300 | -1.45124500 | 1.22111900  |
| C  | -3.62596900 | -2.22526200 | 0.24667200  |
| Br | -0.67262500 | 4.24287400  | -0.15311100 |
| H  | -3.06189100 | -2.39656600 | -0.69181300 |
| H  | -3.86934700 | -3.22060200 | 0.65355700  |
| O  | -4.84697600 | -1.55019700 | -0.08718100 |
| C  | -5.61537300 | -2.25666200 | -1.03770900 |
| H  | -5.88867700 | -3.25361600 | -0.64758500 |
| H  | -5.02631600 | -2.42717300 | -1.95794700 |
| C  | -6.86306700 | -1.44623600 | -1.34873000 |
| H  | -7.48797500 | -1.96308700 | -2.08577500 |
| H  | -7.45191000 | -1.29014600 | -0.43918500 |
| H  | -6.58928200 | -0.46448300 | -1.74900800 |
| C  | -0.96970500 | -3.08934400 | 1.23045300  |
| C  | -0.11406700 | -3.11573900 | 0.16047600  |
| H  | -2.95096900 | -1.67191600 | 2.27554700  |

|    |             |             |             |
|----|-------------|-------------|-------------|
| H  | -1.80798100 | -3.77271900 | 1.26490700  |
| C  | 1.18673300  | -2.49543400 | 0.09572400  |
| C  | 1.89948700  | -2.44296300 | -1.13439900 |
| C  | 1.83236200  | -1.89956400 | 1.21688200  |
| C  | 3.13426600  | -1.80830000 | -1.25656000 |
| H  | 1.46054500  | -2.91157600 | -2.01200700 |
| C  | 3.06453800  | -1.26006000 | 1.10731100  |
| H  | 1.35737300  | -1.94353700 | 2.19166100  |
| C  | 3.70411600  | -1.19773400 | -0.13531400 |
| H  | 3.64547000  | -1.78555300 | -2.21350100 |
| H  | 3.52769100  | -0.81789600 | 1.98359200  |
| H  | -0.67170900 | -2.67524800 | 2.18754400  |
| H  | -0.43426200 | -3.62879900 | -0.74484600 |
| K  | 0.69288500  | 0.44538100  | -0.37841500 |
| Br | 5.41280400  | -0.26231800 | -0.29848400 |

## imb2

SCF Energy (a.u.) = -1399.353237

Thermal correction to Gibbs free energy (a.u.) = 0.265265

Charge = 0, Multiplicity = 1

|    |             |             |             |
|----|-------------|-------------|-------------|
| C  | -1.55906000 | 0.49134200  | 1.79508000  |
| C  | -1.09817400 | 1.79047400  | 1.56061700  |
| C  | -1.30281800 | 2.35044900  | 0.30095900  |
| C  | -1.97535900 | 1.65504300  | -0.70273100 |
| C  | -2.42499400 | 0.35455900  | -0.44076900 |
| C  | -2.21489600 | -0.25725100 | 0.80476100  |
| H  | -1.39387300 | 0.04916700  | 2.77355800  |
| H  | -0.58892600 | 2.34703100  | 2.33984200  |
| H  | -2.16006900 | 2.11787100  | -1.66676100 |
| H  | -2.97039500 | -0.17056600 | -1.21442500 |
| C  | -2.62996100 | -1.68492100 | 1.11351900  |
| C  | -3.54118600 | -2.30406100 | 0.06178900  |
| Br | -0.60975000 | 4.14550400  | -0.08017000 |
| H  | -3.01696900 | -2.37718900 | -0.90537400 |

|    |             |             |             |
|----|-------------|-------------|-------------|
| H  | -3.79510200 | -3.33120400 | 0.36997700  |
| O  | -4.71634800 | -1.52578600 | -0.07102200 |
| C  | -5.61903100 | -2.04545300 | -1.03050300 |
| H  | -5.92002500 | -3.06908800 | -0.75077300 |
| H  | -5.12617300 | -2.11311400 | -2.01629300 |
| C  | -6.82821900 | -1.12848800 | -1.09720600 |
| H  | -7.55191100 | -1.49948000 | -1.83088400 |
| H  | -7.31864200 | -1.07269600 | -0.12026300 |
| H  | -6.52567700 | -0.11658300 | -1.38598900 |
| C  | -1.37898100 | -2.59850900 | 1.33175500  |
| C  | -0.43970100 | -2.68819100 | 0.16635100  |
| H  | -3.19896600 | -1.66324000 | 2.05438500  |
| H  | -1.77124300 | -3.59052700 | 1.61464100  |
| C  | 0.88847500  | -2.29827200 | 0.17155100  |
| C  | 1.74106000  | -2.49466500 | -0.99640000 |
| C  | 1.56417300  | -1.61811000 | 1.27057000  |
| C  | 3.00239000  | -1.94092200 | -1.11275400 |
| H  | 1.35090600  | -3.09214100 | -1.81791800 |
| C  | 2.83357400  | -1.07299600 | 1.14601600  |
| H  | 1.05952900  | -1.51797000 | 2.22605200  |
| C  | 3.52787800  | -1.15051800 | -0.07125400 |
| H  | 3.58601500  | -2.11014800 | -2.01350800 |
| H  | 3.28473100  | -0.56701000 | 1.99543000  |
| H  | -0.85692300 | -2.23398900 | 2.22255200  |
| H  | -0.78932600 | -3.23951500 | -0.70563800 |
| K  | 1.08163100  | 0.42589800  | -0.81677900 |
| Br | 5.34151600  | -0.39671700 | -0.22582200 |
